# Supplementary material
Source: PubMed Central journal article supplement (PMC2754815)
Supplement: NIHMS109919-supplement-1_si_001.pdf [file NIHMS109919-supplement-1_si_001.pdf]

# How Mitogen-Activated Protein Kinases Recognize and Phosphorylate Their Targets: A QM/MM Study

*Adrian Gustavo Turjanski<sup>1ψ\*</sup>, Gerhard Hummer<sup>2</sup> and J. Silvio Gutkind<sup>1</sup>*

<sup>1</sup>Oral and Pharyngeal Cancer Branch, National Institute of Dental and Craniofacial Research, National Institutes of Health, Bethesda, Maryland.

<sup>ψ</sup>Current Address: Departamento de Química Inorgánica, Analítica y Química Física e INQUIMAE y Departamento de Química Biológica, Facultad de Ciencias Exactas y Naturales, UBA, Buenos Aires, Argentina

<sup>2</sup>Laboratory of Chemical Physics, National Institute of Diabetes and Digestive and Kidney Diseases, National Institutes of Health, Bethesda, Maryland 20892-0520, USA

\* Author to whom correspondence should be addressed at: Departamento de Química Inorgánica, Analítica y Química Física e INQUIMAE y Departamento de Química Biológica, Facultad de Ciencias Exactas y Naturales, UBA, Buenos Aires, Argentina. E-mail: [adrian@qi.fcen.uba.ar](mailto:adrian@qi.fcen.uba.ar)

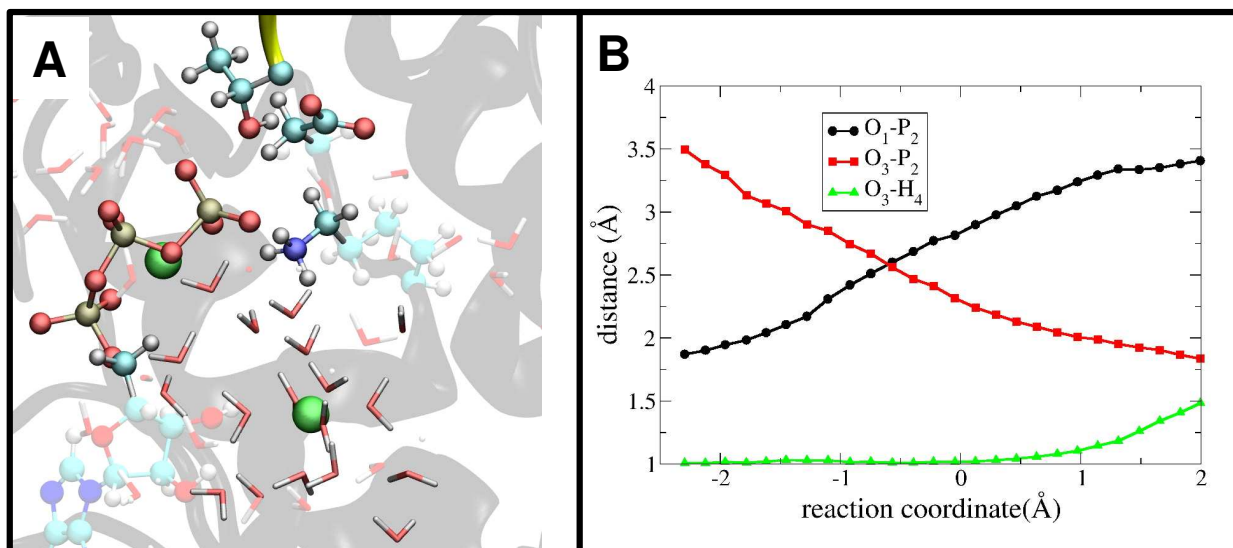

S1 (A) The structure of the system with one Mg in the active site and the second one in the solvent. The quantum subsystem is depicted in ball and stick rendering, the first solvation shell of the second Mg is shown with stick rendering and the rest of the complex is shown as background. (B) The change of relevant bond distances as a function of the reaction coordinate for the system shown in (A).

**Structure of ERK2-pp with ATP, Mg and target peptide used for the QM/MM calculations**

|      |    |     |       |   |    |         |         |        |
|------|----|-----|-------|---|----|---------|---------|--------|
| ATOM | 1  | C   | STO   | A | 1  | 16.228  | 10.123  | 8.941  |
| ATOM | 2  | H   | STO   | A | 2  | 16.929  | 9.617   | 8.232  |
| ATOM | 3  | H   | STO   | A | 3  | 15.590  | 9.327   | 9.393  |
| ATOM | 4  | C   | STO   | A | 4  | 15.389  | 11.101  | 8.076  |
| ATOM | 5  | O   | STO   | A | 5  | 15.733  | 12.343  | 8.095  |
| ATOM | 6  | O   | STO   | A | 6  | 14.449  | 10.590  | 7.368  |
| ATOM | 7  | C   | STO   | A | 7  | 11.654  | 12.463  | 8.518  |
| ATOM | 8  | H   | STO   | A | 8  | 11.689  | 13.277  | 7.757  |
| ATOM | 9  | H   | STO   | A | 9  | 12.522  | 11.788  | 8.336  |
| ATOM | 10 | N   | STO   | A | 10 | 10.403  | 11.675  | 8.302  |
| ATOM | 11 | H   | STO   | A | 11 | 9.532   | 12.114  | 8.658  |
| ATOM | 12 | H   | STO   | A | 12 | 10.293  | 11.536  | 7.275  |
| ATOM | 13 | H   | STO   | A | 13 | 10.449  | 10.656  | 8.635  |
| ATOM | 14 | O   | STO   | A | 14 | 9.045   | 9.272   | 6.420  |
| ATOM | 15 | P   | STO   | A | 15 | 9.667   | 8.250   | 7.371  |
| ATOM | 16 | O   | STO   | A | 16 | 10.377  | 8.950   | 8.609  |
| ATOM | 17 | O   | STO   | A | 17 | 10.518  | 7.075   | 6.805  |
| ATOM | 18 | O   | STO   | A | 18 | 8.395   | 7.469   | 8.361  |
| ATOM | 19 | P   | STO   | A | 19 | 7.794   | 5.895   | 8.095  |
| ATOM | 20 | O   | STO   | A | 20 | 7.228   | 5.820   | 6.687  |
| ATOM | 21 | O   | STO   | A | 21 | 8.939   | 4.916   | 8.490  |
| ATOM | 22 | O   | STO   | A | 22 | 6.673   | 5.793   | 9.299  |
| ATOM | 23 | P   | STO   | A | 23 | 7.143   | 5.832   | 10.969 |
| ATOM | 24 | O   | STO   | A | 24 | 7.231   | 4.450   | 11.591 |
| ATOM | 25 | O   | STO   | A | 25 | 8.336   | 6.833   | 11.131 |
| ATOM | 26 | O   | STO   | A | 26 | 5.816   | 6.575   | 11.549 |
| ATOM | 27 | C   | STO   | A | 27 | 5.189   | 7.588   | 10.736 |
| ATOM | 28 | H   | STO   | A | 28 | 4.726   | 7.117   | 9.833  |
| ATOM | 29 | H   | STO   | A | 29 | 5.912   | 8.374   | 10.402 |
| ATOM | 30 | Mg  | STO   | A | 30 | 9.712   | 7.641   | 10.028 |
| ATOM | 31 | Mg  | STO   | A | 31 | 10.747  | 5.197   | 7.613  |
| ATOM | 32 | C   | STO   | A | 32 | 12.279  | 10.437  | 4.785  |
| ATOM | 33 | H   | STO   | A | 33 | 11.263  | 10.189  | 4.375  |
| ATOM | 34 | C   | STO   | A | 34 | 13.052  | 9.105   | 4.932  |
| ATOM | 35 | H   | STO   | A | 35 | 14.087  | 9.283   | 5.320  |
| ATOM | 36 | H   | STO   | A | 36 | 12.511  | 8.485   | 5.690  |
| ATOM | 37 | H   | STO   | A | 37 | 13.068  | 8.515   | 3.979  |
| ATOM | 38 | O   | STO   | A | 38 | 12.100  | 11.034  | 6.058  |
| ATOM | 39 | H   | STO   | A | 39 | 13.002  | 11.024  | 6.519  |
| ATOM | 40 | H   | STO   | A | 40 | 4.389   | 8.015   | 11.341 |
| ATOM | 41 | H   | STO   | A | 41 | 11.796  | 12.897  | 9.508  |
| ATOM | 42 | H   | STO   | A | 42 | 16.835  | 10.614  | 9.701  |
| ATOM | 43 | H   | STO   | A | 43 | 12.710  | 11.175  | 4.108  |
| ATOM | 44 | N   | NALAA |   | 1  | -17.569 | -11.621 | 12.718 |
| ATOM | 45 | H1  | NALAA |   | 1  | -18.388 | -12.182 | 12.915 |
| ATOM | 46 | H2  | NALAA |   | 1  | -17.676 | -11.171 | 11.816 |
| ATOM | 47 | H3  | NALAA |   | 1  | -17.490 | -10.901 | 13.426 |
| ATOM | 48 | CA  | NALAA |   | 1  | -16.359 | -12.468 | 12.712 |
| ATOM | 49 | HA  | NALAA |   | 1  | -16.263 | -12.942 | 13.687 |
| ATOM | 50 | CB  | NALAA |   | 1  | -16.476 | -13.580 | 11.659 |
| ATOM | 51 | HB1 | NALAA |   | 1  | -15.572 | -14.190 | 11.670 |

|      |     |     |       |   |         |         |        |
|------|-----|-----|-------|---|---------|---------|--------|
| ATOM | 52  | HB2 | NALAA | 1 | -17.333 | -14.217 | 11.886 |
| ATOM | 53  | HB3 | NALAA | 1 | -16.600 | -13.152 | 10.663 |
| ATOM | 54  | C   | NALAA | 1 | -15.107 | -11.623 | 12.471 |
| ATOM | 55  | O   | NALAA | 1 | -15.007 | -10.983 | 11.429 |
| ATOM | 56  | N   | ALA A | 2 | -14.148 | -11.617 | 13.402 |
| ATOM | 57  | H   | ALA A | 2 | -14.261 | -12.196 | 14.227 |
| ATOM | 58  | CA  | ALA A | 2 | -12.872 | -10.914 | 13.243 |
| ATOM | 59  | HA  | ALA A | 2 | -13.067 | -9.945  | 12.778 |
| ATOM | 60  | CB  | ALA A | 2 | -12.267 | -10.657 | 14.631 |
| ATOM | 61  | HB1 | ALA A | 2 | -11.341 | -10.087 | 14.530 |
| ATOM | 62  | HB2 | ALA A | 2 | -12.966 | -10.079 | 15.238 |
| ATOM | 63  | HB3 | ALA A | 2 | -12.050 | -11.604 | 15.124 |
| ATOM | 64  | C   | ALA A | 2 | -11.904 | -11.676 | 12.315 |
| ATOM | 65  | O   | ALA A | 2 | -11.875 | -12.911 | 12.292 |
| ATOM | 66  | N   | GLY A | 3 | -11.090 | -10.928 | 11.565 |
| ATOM | 67  | H   | GLY A | 3 | -11.180 | -9.919  | 11.614 |
| ATOM | 68  | CA  | GLY A | 3 | -10.140 | -11.456 | 10.578 |
| ATOM | 69  | HA2 | GLY A | 3 | -9.195  | -11.674 | 11.076 |
| ATOM | 70  | HA3 | GLY A | 3 | -10.522 | -12.388 | 10.167 |
| ATOM | 71  | C   | GLY A | 3 | -9.853  | -10.444 | 9.459  |
| ATOM | 72  | O   | GLY A | 3 | -9.980  | -9.245  | 9.712  |
| ATOM | 73  | N   | PRO A | 4 | -9.470  | -10.885 | 8.243  |
| ATOM | 74  | CD  | PRO A | 4 | -9.319  | -12.268 | 7.816  |
| ATOM | 75  | HD2 | PRO A | 4 | -10.161 | -12.888 | 8.125  |
| ATOM | 76  | HD3 | PRO A | 4 | -8.385  | -12.664 | 8.215  |
| ATOM | 77  | CG  | PRO A | 4 | -9.238  | -12.224 | 6.292  |
| ATOM | 78  | HG2 | PRO A | 4 | -10.247 | -12.216 | 5.874  |
| ATOM | 79  | HG3 | PRO A | 4 | -8.659  | -13.059 | 5.895  |
| ATOM | 80  | CB  | PRO A | 4 | -8.558  | -10.883 | 6.032  |
| ATOM | 81  | HB2 | PRO A | 4 | -8.808  | -10.491 | 5.045  |
| ATOM | 82  | HB3 | PRO A | 4 | -7.481  | -11.003 | 6.127  |
| ATOM | 83  | CA  | PRO A | 4 | -9.079  | -9.989  | 7.162  |
| ATOM | 84  | HA  | PRO A | 4 | -8.266  | -9.370  | 7.519  |
| ATOM | 85  | C   | PRO A | 4 | -10.231 | -9.091  | 6.704  |
| ATOM | 86  | O   | PRO A | 4 | -11.367 | -9.550  | 6.589  |
| ATOM | 87  | N   | GLU A | 5 | -9.920  | -7.827  | 6.401  |
| ATOM | 88  | H   | GLU A | 5 | -8.968  | -7.509  | 6.568  |
| ATOM | 89  | CA  | GLU A | 5 | -10.848 | -6.840  | 5.831  |
| ATOM | 90  | HA  | GLU A | 5 | -11.346 | -7.319  | 4.988  |
| ATOM | 91  | CB  | GLU A | 5 | -11.954 | -6.433  | 6.825  |
| ATOM | 92  | HB2 | GLU A | 5 | -12.603 | -5.718  | 6.318  |
| ATOM | 93  | HB3 | GLU A | 5 | -12.564 | -7.304  | 7.057  |
| ATOM | 94  | CG  | GLU A | 5 | -11.472 | -5.815  | 8.149  |
| ATOM | 95  | HG2 | GLU A | 5 | -10.850 | -6.538  | 8.679  |
| ATOM | 96  | HG3 | GLU A | 5 | -10.877 | -4.925  | 7.942  |
| ATOM | 97  | CD  | GLU A | 5 | -12.651 | -5.424  | 9.045  |
| ATOM | 98  | OE1 | GLU A | 5 | -12.523 | -5.407  | 10.288 |
| ATOM | 99  | OE2 | GLU A | 5 | -13.742 | -5.100  | 8.519  |
| ATOM | 100 | C   | GLU A | 5 | -10.108 | -5.617  | 5.263  |
| ATOM | 101 | O   | GLU A | 5 | -8.951  | -5.363  | 5.598  |
| ATOM | 102 | N   | MET A | 6 | -10.757 | -4.857  | 4.369  |
| ATOM | 103 | H   | MET A | 6 | -11.716 | -5.072  | 4.148  |
| ATOM | 104 | CA  | MET A | 6 | -10.116 | -3.727  | 3.685  |
| ATOM | 105 | HA  | MET A | 6 | -9.085  | -4.016  | 3.494  |
| ATOM | 106 | CB  | MET A | 6 | -10.759 | -3.460  | 2.315  |
| ATOM | 107 | HB2 | MET A | 6 | -10.790 | -4.387  | 1.741  |
| ATOM | 108 | HB3 | MET A | 6 | -11.777 | -3.097  | 2.449  |

|      |     |         |     |   |   |         |        |        |
|------|-----|---------|-----|---|---|---------|--------|--------|
| ATOM | 109 | CG      | MET | A | 6 | -9.942  | -2.417 | 1.535  |
| ATOM | 110 | HG2     | MET | A | 6 | -9.829  | -1.530 | 2.155  |
| ATOM | 111 | HG3     | MET | A | 6 | -8.948  | -2.819 | 1.336  |
| ATOM | 112 | SD      | MET | A | 6 | -10.675 | -1.864 | -0.023 |
| ATOM | 113 | CE      | MET | A | 6 | -10.342 | -3.301 | -1.071 |
| ATOM | 114 | HE1     | MET | A | 6 | -10.730 | -3.109 | -2.072 |
| ATOM | 115 | HE2     | MET | A | 6 | -9.270  | -3.478 | -1.138 |
| ATOM | 116 | HE3     | MET | A | 6 | -10.836 | -4.184 | -0.670 |
| ATOM | 117 | C       | MET | A | 6 | -10.099 | -2.461 | 4.554  |
| ATOM | 118 | O       | MET | A | 6 | -11.152 | -1.896 | 4.873  |
| ATOM | 119 | N       | VAL | A | 7 | -8.896  | -1.967 | 4.840  |
| ATOM | 120 | H       | VAL | A | 7 | -8.090  | -2.490 | 4.485  |
| ATOM | 121 | CA      | VAL | A | 7 | -8.621  | -0.697 | 5.524  |
| ATOM | 122 | HA      | VAL | A | 7 | -9.561  | -0.234 | 5.814  |
| ATOM | 123 | CB      | VAL | A | 7 | -7.796  | -0.929 | 6.813  |
| ATOM | 124 | HB      | VAL | A | 7 | -6.870  | -1.445 | 6.555  |
| ATOM | 125 | CG1     | VAL | A | 7 | -7.437  | 0.405  | 7.484  |
| ATOM | 126 | HG11VAL | VAL | A | 7 | -8.332  | 1.015  | 7.615  |
| ATOM | 127 | HG12VAL | VAL | A | 7 | -6.988  | 0.223  | 8.460  |
| ATOM | 128 | HG13VAL | VAL | A | 7 | -6.716  | 0.939  | 6.866  |
| ATOM | 129 | CG2     | VAL | A | 7 | -8.564  | -1.799 | 7.825  |
| ATOM | 130 | HG21VAL | VAL | A | 7 | -9.503  | -1.314 | 8.096  |
| ATOM | 131 | HG22VAL | VAL | A | 7 | -8.776  | -2.780 | 7.401  |
| ATOM | 132 | HG23VAL | VAL | A | 7 | -7.962  | -1.939 | 8.725  |
| ATOM | 133 | C       | VAL | A | 7 | -7.895  | 0.236  | 4.545  |
| ATOM | 134 | O       | VAL | A | 7 | -6.818  | -0.097 | 4.052  |
| ATOM | 135 | N       | ARG | A | 8 | -8.511  | 1.386  | 4.223  |
| ATOM | 136 | H       | ARG | A | 8 | -9.422  | 1.558  | 4.640  |
| ATOM | 137 | CA      | ARG | A | 8 | -7.959  | 2.434  | 3.341  |
| ATOM | 138 | HA      | ARG | A | 8 | -8.802  | 3.067  | 3.066  |
| ATOM | 139 | CB      | ARG | A | 8 | -6.966  | 3.307  | 4.147  |
| ATOM | 140 | HB2     | ARG | A | 8 | -7.415  | 3.544  | 5.112  |
| ATOM | 141 | HB3     | ARG | A | 8 | -6.063  | 2.725  | 4.340  |
| ATOM | 142 | CG      | ARG | A | 8 | -6.559  | 4.638  | 3.483  |
| ATOM | 143 | HG2     | ARG | A | 8 | -5.744  | 5.080  | 4.055  |
| ATOM | 144 | HG3     | ARG | A | 8 | -6.164  | 4.438  | 2.494  |
| ATOM | 145 | CD      | ARG | A | 8 | -7.681  | 5.677  | 3.339  |
| ATOM | 146 | HD2     | ARG | A | 8 | -7.399  | 6.381  | 2.553  |
| ATOM | 147 | HD3     | ARG | A | 8 | -8.600  | 5.192  | 3.011  |
| ATOM | 148 | NE      | ARG | A | 8 | -7.931  | 6.417  | 4.592  |
| ATOM | 149 | HE      | ARG | A | 8 | -8.745  | 6.140  | 5.138  |
| ATOM | 150 | CZ      | ARG | A | 8 | -7.285  | 7.508  | 4.993  |
| ATOM | 151 | NH1     | ARG | A | 8 | -6.252  | 7.981  | 4.331  |
| ATOM | 152 | HH11ARG | ARG | A | 8 | -5.914  | 7.500  | 3.520  |
| ATOM | 153 | HH12ARG | ARG | A | 8 | -5.760  | 8.807  | 4.655  |
| ATOM | 154 | NH2     | ARG | A | 8 | -7.663  | 8.141  | 6.081  |
| ATOM | 155 | HH21ARG | ARG | A | 8 | -8.399  | 7.761  | 6.661  |
| ATOM | 156 | HH22ARG | ARG | A | 8 | -7.221  | 9.021  | 6.328  |
| ATOM | 157 | C       | ARG | A | 8 | -7.395  | 1.871  | 2.010  |
| ATOM | 158 | O       | ARG | A | 8 | -6.277  | 2.166  | 1.593  |
| ATOM | 159 | N       | GLY | A | 9 | -8.155  | 0.999  | 1.338  |
| ATOM | 160 | H       | GLY | A | 9 | -9.071  | 0.796  | 1.709  |
| ATOM | 161 | CA      | GLY | A | 9 | -7.799  | 0.467  | 0.009  |
| ATOM | 162 | HA2     | GLY | A | 9 | -8.701  | 0.082  | -0.470 |
| ATOM | 163 | HA3     | GLY | A | 9 | -7.390  | 1.277  | -0.598 |
| ATOM | 164 | C       | GLY | A | 9 | -6.762  | -0.667 | 0.000  |
| ATOM | 165 | O       | GLY | A | 9 | -6.319  | -1.062 | -1.077 |

|      |     |      |     |   |    |        |        |        |
|------|-----|------|-----|---|----|--------|--------|--------|
| ATOM | 166 | N    | GLN | A | 10 | -6.371 | -1.210 | 1.159  |
| ATOM | 167 | H    | GLN | A | 10 | -6.717 | -0.823 | 2.028  |
| ATOM | 168 | CA   | GLN | A | 10 | -5.570 | -2.436 | 1.269  |
| ATOM | 169 | HA   | GLN | A | 10 | -5.512 | -2.927 | 0.297  |
| ATOM | 170 | CB   | GLN | A | 10 | -4.141 | -2.118 | 1.750  |
| ATOM | 171 | HB2  | GLN | A | 10 | -4.189 | -1.580 | 2.698  |
| ATOM | 172 | HB3  | GLN | A | 10 | -3.615 | -3.060 | 1.916  |
| ATOM | 173 | CG   | GLN | A | 10 | -3.345 | -1.282 | 0.732  |
| ATOM | 174 | HG2  | GLN | A | 10 | -3.381 | -1.762 | -0.246 |
| ATOM | 175 | HG3  | GLN | A | 10 | -3.810 | -0.300 | 0.645  |
| ATOM | 176 | CD   | GLN | A | 10 | -1.875 | -1.102 | 1.120  |
| ATOM | 177 | OE1  | GLN | A | 10 | -1.183 | -2.031 | 1.532  |
| ATOM | 178 | NE2  | GLN | A | 10 | -1.343 | 0.098  | 1.017  |
| ATOM | 179 | HE21 | GLN | A | 10 | -0.366 | 0.203  | 1.219  |
| ATOM | 180 | HE22 | GLN | A | 10 | -1.919 | 0.894  | 0.757  |
| ATOM | 181 | C    | GLN | A | 10 | -6.250 | -3.403 | 2.247  |
| ATOM | 182 | O    | GLN | A | 10 | -6.926 | -2.962 | 3.174  |
| ATOM | 183 | N    | VAL | A | 11 | -6.068 | -4.715 | 2.065  |
| ATOM | 184 | H    | VAL | A | 11 | -5.486 | -5.033 | 1.305  |
| ATOM | 185 | CA   | VAL | A | 11 | -6.534 | -5.736 | 3.021  |
| ATOM | 186 | HA   | VAL | A | 11 | -7.504 | -5.429 | 3.408  |
| ATOM | 187 | CB   | VAL | A | 11 | -6.724 | -7.120 | 2.357  |
| ATOM | 188 | HB   | VAL | A | 11 | -5.783 | -7.411 | 1.889  |
| ATOM | 189 | CG1  | VAL | A | 11 | -7.134 | -8.209 | 3.368  |
| ATOM | 190 | HG11 | VAL | A | 11 | -6.337 | -8.378 | 4.092  |
| ATOM | 191 | HG12 | VAL | A | 11 | -8.040 | -7.908 | 3.895  |
| ATOM | 192 | HG13 | VAL | A | 11 | -7.320 | -9.149 | 2.847  |
| ATOM | 193 | CG2  | VAL | A | 11 | -7.803 | -7.035 | 1.263  |
| ATOM | 194 | HG21 | VAL | A | 11 | -8.750 | -6.710 | 1.697  |
| ATOM | 195 | HG22 | VAL | A | 11 | -7.504 | -6.329 | 0.488  |
| ATOM | 196 | HG23 | VAL | A | 11 | -7.939 | -8.013 | 0.800  |
| ATOM | 197 | C    | VAL | A | 11 | -5.545 | -5.822 | 4.185  |
| ATOM | 198 | O    | VAL | A | 11 | -4.337 | -5.925 | 3.964  |
| ATOM | 199 | N    | PHE | A | 12 | -6.069 | -5.783 | 5.411  |
| ATOM | 200 | H    | PHE | A | 12 | -7.079 | -5.692 | 5.492  |
| ATOM | 201 | CA   | PHE | A | 12 | -5.324 | -5.895 | 6.666  |
| ATOM | 202 | HA   | PHE | A | 12 | -4.254 | -5.849 | 6.461  |
| ATOM | 203 | CB   | PHE | A | 12 | -5.718 | -4.704 | 7.565  |
| ATOM | 204 | HB2  | PHE | A | 12 | -6.178 | -3.925 | 6.954  |
| ATOM | 205 | HB3  | PHE | A | 12 | -6.486 | -5.018 | 8.274  |
| ATOM | 206 | CG   | PHE | A | 12 | -4.564 | -4.074 | 8.320  |
| ATOM | 207 | CD1  | PHE | A | 12 | -3.911 | -2.944 | 7.789  |
| ATOM | 208 | HD1  | PHE | A | 12 | -4.230 | -2.526 | 6.844  |
| ATOM | 209 | CE1  | PHE | A | 12 | -2.841 | -2.356 | 8.485  |
| ATOM | 210 | HE1  | PHE | A | 12 | -2.339 | -1.491 | 8.074  |
| ATOM | 211 | CZ   | PHE | A | 12 | -2.431 | -2.877 | 9.724  |
| ATOM | 212 | HZ   | PHE | A | 12 | -1.619 | -2.408 | 10.264 |
| ATOM | 213 | CE2  | PHE | A | 12 | -3.077 | -4.007 | 10.254 |
| ATOM | 214 | HE2  | PHE | A | 12 | -2.756 | -4.418 | 11.200 |
| ATOM | 215 | CD2  | PHE | A | 12 | -4.137 | -4.609 | 9.550  |
| ATOM | 216 | HD2  | PHE | A | 12 | -4.625 | -5.483 | 9.957  |
| ATOM | 217 | C    | PHE | A | 12 | -5.648 | -7.244 | 7.331  |
| ATOM | 218 | O    | PHE | A | 12 | -6.820 | -7.580 | 7.472  |
| ATOM | 219 | N    | ASP | A | 13 | -4.634 | -8.020 | 7.735  |
| ATOM | 220 | H    | ASP | A | 13 | -3.688 | -7.695 | 7.584  |
| ATOM | 221 | CA   | ASP | A | 13 | -4.789 | -9.403 | 8.220  |
| ATOM | 222 | HA   | ASP | A | 13 | -5.788 | -9.531 | 8.638  |

|      |     |      |     |   |    |         |         |        |
|------|-----|------|-----|---|----|---------|---------|--------|
| ATOM | 223 | CB   | ASP | A | 13 | -4.656  | -10.358 | 7.015  |
| ATOM | 224 | HB2  | ASP | A | 13 | -5.379  | -10.054 | 6.257  |
| ATOM | 225 | HB3  | ASP | A | 13 | -3.662  | -10.241 | 6.579  |
| ATOM | 226 | CG   | ASP | A | 13 | -4.875  | -11.849 | 7.318  |
| ATOM | 227 | OD1  | ASP | A | 13 | -5.062  | -12.625 | 6.361  |
| ATOM | 228 | OD2  | ASP | A | 13 | -4.751  | -12.295 | 8.486  |
| ATOM | 229 | C    | ASP | A | 13 | -3.754  | -9.707  | 9.319  |
| ATOM | 230 | O    | ASP | A | 13 | -2.555  | -9.755  | 9.047  |
| ATOM | 231 | N    | VAL | A | 14 | -4.226  | -9.923  | 10.554 |
| ATOM | 232 | H    | VAL | A | 14 | -5.233  | -9.921  | 10.659 |
| ATOM | 233 | CA   | VAL | A | 14 | -3.382  | -10.017 | 11.771 |
| ATOM | 234 | HA   | VAL | A | 14 | -2.409  | -10.398 | 11.463 |
| ATOM | 235 | CB   | VAL | A | 14 | -3.160  | -8.624  | 12.417 |
| ATOM | 236 | HB   | VAL | A | 14 | -2.610  | -8.763  | 13.348 |
| ATOM | 237 | CG1  | VAL | A | 14 | -2.309  | -7.688  | 11.545 |
| ATOM | 238 | HG11 | VAL | A | 14 | -2.843  | -7.411  | 10.637 |
| ATOM | 239 | HG12 | VAL | A | 14 | -2.079  | -6.781  | 12.104 |
| ATOM | 240 | HG13 | VAL | A | 14 | -1.374  | -8.182  | 11.279 |
| ATOM | 241 | CG2  | VAL | A | 14 | -4.487  | -7.924  | 12.759 |
| ATOM | 242 | HG21 | VAL | A | 14 | -4.282  | -7.023  | 13.337 |
| ATOM | 243 | HG22 | VAL | A | 14 | -5.020  | -7.646  | 11.849 |
| ATOM | 244 | HG23 | VAL | A | 14 | -5.118  | -8.584  | 13.351 |
| ATOM | 245 | C    | VAL | A | 14 | -3.895  | -10.993 | 12.854 |
| ATOM | 246 | O    | VAL | A | 14 | -3.191  | -11.240 | 13.835 |
| ATOM | 247 | N    | GLY | A | 15 | -5.093  | -11.571 | 12.690 |
| ATOM | 248 | H    | GLY | A | 15 | -5.606  | -11.399 | 11.832 |
| ATOM | 249 | CA   | GLY | A | 15 | -5.698  | -12.523 | 13.628 |
| ATOM | 250 | HA2  | GLY | A | 15 | -6.204  | -13.287 | 13.039 |
| ATOM | 251 | HA3  | GLY | A | 15 | -4.924  | -12.994 | 14.231 |
| ATOM | 252 | C    | GLY | A | 15 | -6.725  | -11.903 | 14.592 |
| ATOM | 253 | O    | GLY | A | 15 | -6.636  | -10.713 | 14.898 |
| ATOM | 254 | N    | PRO | A | 16 | -7.666  | -12.710 | 15.132 |
| ATOM | 255 | CD   | PRO | A | 16 | -7.738  | -14.156 | 14.964 |
| ATOM | 256 | HD2  | PRO | A | 16 | -6.774  | -14.631 | 15.144 |
| ATOM | 257 | HD3  | PRO | A | 16 | -8.086  | -14.384 | 13.957 |
| ATOM | 258 | CG   | PRO | A | 16 | -8.757  | -14.643 | 15.989 |
| ATOM | 259 | HG2  | PRO | A | 16 | -8.260  | -14.777 | 16.952 |
| ATOM | 260 | HG3  | PRO | A | 16 | -9.250  | -15.561 | 15.667 |
| ATOM | 261 | CB   | PRO | A | 16 | -9.728  | -13.469 | 16.074 |
| ATOM | 262 | HB2  | PRO | A | 16 | -10.276 | -13.472 | 17.018 |
| ATOM | 263 | HB3  | PRO | A | 16 | -10.421 | -13.505 | 15.230 |
| ATOM | 264 | CA   | PRO | A | 16 | -8.806  | -12.248 | 15.934 |
| ATOM | 265 | HA   | PRO | A | 16 | -9.331  | -11.470 | 15.381 |
| ATOM | 266 | C    | PRO | A | 16 | -8.433  | -11.666 | 17.309 |
| ATOM | 267 | O    | PRO | A | 16 | -9.285  | -11.054 | 17.949 |
| ATOM | 268 | N    | ARG | A | 17 | -7.173  | -11.805 | 17.751 |
| ATOM | 269 | H    | ARG | A | 17 | -6.534  | -12.346 | 17.192 |
| ATOM | 270 | CA   | ARG | A | 17 | -6.620  | -11.097 | 18.917 |
| ATOM | 271 | HA   | ARG | A | 17 | -7.162  | -11.403 | 19.813 |
| ATOM | 272 | CB   | ARG | A | 17 | -5.142  | -11.506 | 19.074 |
| ATOM | 273 | HB2  | ARG | A | 17 | -5.106  | -12.575 | 19.290 |
| ATOM | 274 | HB3  | ARG | A | 17 | -4.613  | -11.323 | 18.135 |
| ATOM | 275 | CG   | ARG | A | 17 | -4.403  | -10.766 | 20.201 |
| ATOM | 276 | HG2  | ARG | A | 17 | -4.341  | -9.702  | 19.973 |
| ATOM | 277 | HG3  | ARG | A | 17 | -4.931  | -10.894 | 21.144 |
| ATOM | 278 | CD   | ARG | A | 17 | -2.985  | -11.319 | 20.333 |
| ATOM | 279 | HD2  | ARG | A | 17 | -3.037  | -12.345 | 20.704 |

|      |     |      |     |   |    |         |         |        |
|------|-----|------|-----|---|----|---------|---------|--------|
| ATOM | 280 | HD3  | ARG | A | 17 | -2.523  | -11.324 | 19.342 |
| ATOM | 281 | NE   | ARG | A | 17 | -2.179  | -10.497 | 21.246 |
| ATOM | 282 | HE   | ARG | A | 17 | -2.669  | -9.788  | 21.791 |
| ATOM | 283 | CZ   | ARG | A | 17 | -0.853  | -10.527 | 21.317 |
| ATOM | 284 | NH1  | ARG | A | 17 | -0.133  | -11.356 | 20.598 |
| ATOM | 285 | HH11 | ARG | A | 17 | -0.576  | -12.019 | 19.992 |
| ATOM | 286 | HH12 | ARG | A | 17 | 0.877   | -11.257 | 20.550 |
| ATOM | 287 | NH2  | ARG | A | 17 | -0.216  | -9.706  | 22.113 |
| ATOM | 288 | HH21 | ARG | A | 17 | -0.745  | -8.965  | 22.569 |
| ATOM | 289 | HH22 | ARG | A | 17 | 0.789   | -9.688  | 22.113 |
| ATOM | 290 | C    | ARG | A | 17 | -6.757  | -9.572  | 18.782 |
| ATOM | 291 | O    | ARG | A | 17 | -6.908  | -8.884  | 19.793 |
| ATOM | 292 | N    | TYR | A | 18 | -6.704  | -9.038  | 17.560 |
| ATOM | 293 | H    | TYR | A | 18 | -6.657  | -9.658  | 16.760 |
| ATOM | 294 | CA   | TYR | A | 18 | -6.756  | -7.602  | 17.287 |
| ATOM | 295 | HA   | TYR | A | 18 | -6.622  | -7.059  | 18.217 |
| ATOM | 296 | CB   | TYR | A | 18 | -5.584  | -7.218  | 16.376 |
| ATOM | 297 | HB2  | TYR | A | 18 | -5.717  | -7.706  | 15.411 |
| ATOM | 298 | HB3  | TYR | A | 18 | -5.607  | -6.141  | 16.206 |
| ATOM | 299 | CG   | TYR | A | 18 | -4.227  | -7.594  | 16.945 |
| ATOM | 300 | CD1  | TYR | A | 18 | -3.645  | -6.804  | 17.956 |
| ATOM | 301 | HD1  | TYR | A | 18 | -4.150  | -5.915  | 18.306 |
| ATOM | 302 | CE1  | TYR | A | 18 | -2.405  | -7.169  | 18.513 |
| ATOM | 303 | HE1  | TYR | A | 18 | -1.954  | -6.553  | 19.277 |
| ATOM | 304 | CZ   | TYR | A | 18 | -1.746  | -8.338  | 18.069 |
| ATOM | 305 | OH   | TYR | A | 18 | -0.557  | -8.707  | 18.618 |
| ATOM | 306 | HH   | TYR | A | 18 | -0.247  | -8.067  | 19.282 |
| ATOM | 307 | CE2  | TYR | A | 18 | -2.332  | -9.133  | 17.059 |
| ATOM | 308 | HE2  | TYR | A | 18 | -1.821  | -10.018 | 16.712 |
| ATOM | 309 | CD2  | TYR | A | 18 | -3.569  | -8.759  | 16.500 |
| ATOM | 310 | HD2  | TYR | A | 18 | -4.017  | -9.370  | 15.728 |
| ATOM | 311 | C    | TYR | A | 18 | -8.104  | -7.194  | 16.673 |
| ATOM | 312 | O    | TYR | A | 18 | -8.533  | -7.771  | 15.673 |
| ATOM | 313 | N    | THR | A | 19 | -8.766  | -6.186  | 17.254 |
| ATOM | 314 | H    | THR | A | 19 | -8.362  | -5.759  | 18.082 |
| ATOM | 315 | CA   | THR | A | 19 | -10.037 | -5.624  | 16.754 |
| ATOM | 316 | HA   | THR | A | 19 | -10.271 | -6.078  | 15.790 |
| ATOM | 317 | CB   | THR | A | 19 | -11.203 | -5.940  | 17.706 |
| ATOM | 318 | HB   | THR | A | 19 | -12.099 | -5.420  | 17.359 |
| ATOM | 319 | CG2  | THR | A | 19 | -11.515 | -7.436  | 17.746 |
| ATOM | 320 | HG21 | THR | A | 19 | -11.777 | -7.781  | 16.745 |
| ATOM | 321 | HG22 | THR | A | 19 | -10.653 | -8.004  | 18.097 |
| ATOM | 322 | HG23 | THR | A | 19 | -12.359 | -7.618  | 18.411 |
| ATOM | 323 | OG1  | THR | A | 19 | -10.897 | -5.501  | 19.008 |
| ATOM | 324 | HG1  | THR | A | 19 | -11.705 | -5.519  | 19.532 |
| ATOM | 325 | C    | THR | A | 19 | -9.914  | -4.124  | 16.510 |
| ATOM | 326 | O    | THR | A | 19 | -8.912  | -3.507  | 16.865 |
| ATOM | 327 | N    | ASN | A | 20 | -10.923 | -3.537  | 15.857 |
| ATOM | 328 | H    | ASN | A | 20 | -11.694 | -4.122  | 15.573 |
| ATOM | 329 | CA   | ASN | A | 20 | -11.053 | -2.087  | 15.616 |
| ATOM | 330 | HA   | ASN | A | 20 | -12.014 | -1.953  | 15.119 |
| ATOM | 331 | CB   | ASN | A | 20 | -11.125 | -1.342  | 16.968 |
| ATOM | 332 | HB2  | ASN | A | 20 | -11.811 | -1.869  | 17.633 |
| ATOM | 333 | HB3  | ASN | A | 20 | -10.141 | -1.329  | 17.437 |
| ATOM | 334 | CG   | ASN | A | 20 | -11.614 | 0.096   | 16.830 |
| ATOM | 335 | OD1  | ASN | A | 20 | -10.881 | 1.043   | 17.080 |
| ATOM | 336 | ND2  | ASN | A | 20 | -12.861 | 0.313   | 16.457 |



|      |     |         |     |    |         |         |        |        |
|------|-----|---------|-----|----|---------|---------|--------|--------|
| ATOM | 337 | HD21ASN | A   | 20 | -13.193 | 1.267   | 16.398 |        |
| ATOM | 338 | HD22ASN | A   | 20 | -13.495 | -0.445  | 16.263 |        |
| ATOM | 339 | C       | ASN | A  | 20      | -9.989  | -1.502 | 14.648 |
| ATOM | 340 | O       | ASN | A  | 20      | -9.857  | -0.283 | 14.544 |
| ATOM | 341 | N       | LEU | A  | 21      | -9.261  | -2.360 | 13.919 |
| ATOM | 342 | H       | LEU | A  | 21      | -9.452  | -3.339 | 14.053 |
| ATOM | 343 | CA      | LEU | A  | 21      | -8.216  | -2.034 | 12.935 |
| ATOM | 344 | HA      | LEU | A  | 21      | -7.311  | -1.734 | 13.459 |
| ATOM | 345 | CB      | LEU | A  | 21      | -7.912  | -3.318 | 12.131 |
| ATOM | 346 | HB2     | LEU | A  | 21      | -8.854  | -3.685 | 11.718 |
| ATOM | 347 | HB3     | LEU | A  | 21      | -7.265  | -3.077 | 11.284 |
| ATOM | 348 | CG      | LEU | A  | 21      | -7.249  | -4.433 | 12.976 |
| ATOM | 349 | HG      | LEU | A  | 21      | -7.610  | -4.379 | 14.005 |
| ATOM | 350 | CD1     | LEU | A  | 21      | -7.609  | -5.823 | 12.435 |
| ATOM | 351 | HD11LEU | A   | 21 | -7.262  | -5.932  | 11.407 |        |
| ATOM | 352 | HD12LEU | A   | 21 | -7.147  | -6.590  | 13.056 |        |
| ATOM | 353 | HD13LEU | A   | 21 | -8.690  | -5.963  | 12.464 |        |
| ATOM | 354 | CD2     | LEU | A  | 21      | -5.723  | -4.274 | 12.992 |
| ATOM | 355 | HD21LEU | A   | 21 | -5.446  | -3.234  | 13.153 |        |
| ATOM | 356 | HD22LEU | A   | 21 | -5.303  | -4.886  | 13.788 |        |
| ATOM | 357 | HD23LEU | A   | 21 | -5.306  | -4.592  | 12.040 |        |
| ATOM | 358 | C       | LEU | A  | 21      | -8.631  | -0.867 | 12.019 |
| ATOM | 359 | O       | LEU | A  | 21      | -9.572  | -0.991 | 11.241 |
| ATOM | 360 | N       | SER | A  | 22      | -7.968  | 0.284  | 12.147 |
| ATOM | 361 | H       | SER | A  | 22      | -7.271  | 0.352  | 12.888 |
| ATOM | 362 | CA      | SER | A  | 22      | -8.346  | 1.529  | 11.448 |
| ATOM | 363 | HA      | SER | A  | 22      | -8.901  | 1.290  | 10.540 |
| ATOM | 364 | CB      | SER | A  | 22      | -9.253  | 2.386  | 12.346 |
| ATOM | 365 | HB2     | SER | A  | 22      | -8.684  | 2.714  | 13.217 |
| ATOM | 366 | HB3     | SER | A  | 22      | -9.566  | 3.271  | 11.791 |
| ATOM | 367 | OG      | SER | A  | 22      | -10.408 | 1.689  | 12.787 |
| ATOM | 368 | HG      | SER | A  | 22      | -10.107 | 0.862  | 13.212 |
| ATOM | 369 | C       | SER | A  | 22      | -7.124  | 2.380  | 11.058 |
| ATOM | 370 | O       | SER | A  | 22      | -6.225  | 2.584  | 11.873 |
| ATOM | 371 | N       | TYR | A  | 23      | -7.090  | 2.918  | 9.833  |
| ATOM | 372 | H       | TYR | A  | 23      | -7.861  | 2.738  | 9.204  |
| ATOM | 373 | CA      | TYR | A  | 23      | -5.959  | 3.704  | 9.313  |
| ATOM | 374 | HA      | TYR | A  | 23      | -5.056  | 3.097  | 9.381  |
| ATOM | 375 | CB      | TYR | A  | 23      | -6.202  | 4.018  | 7.827  |
| ATOM | 376 | HB2     | TYR | A  | 23      | -6.341  | 3.080  | 7.296  |
| ATOM | 377 | HB3     | TYR | A  | 23      | -7.133  | 4.581  | 7.729  |
| ATOM | 378 | CG      | TYR | A  | 23      | -5.104  | 4.797  | 7.123  |
| ATOM | 379 | CD1     | TYR | A  | 23      | -4.153  | 4.123  | 6.331  |
| ATOM | 380 | HD1     | TYR | A  | 23      | -4.171  | 3.044  | 6.271  |
| ATOM | 381 | CE1     | TYR | A  | 23      | -3.208  | 4.852  | 5.581  |
| ATOM | 382 | HE1     | TYR | A  | 23      | -2.496  | 4.342  | 4.950  |
| ATOM | 383 | CZ      | TYR | A  | 23      | -3.196  | 6.262  | 5.638  |
| ATOM | 384 | OH      | TYR | A  | 23      | -2.308  | 6.976  | 4.894  |
| ATOM | 385 | HH      | TYR | A  | 23      | -1.787  | 6.430  | 4.278  |
| ATOM | 386 | CE2     | TYR | A  | 23      | -4.119  | 6.935  | 6.468  |
| ATOM | 387 | HE2     | TYR | A  | 23      | -4.113  | 8.014  | 6.520  |
| ATOM | 388 | CD2     | TYR | A  | 23      | -5.075  | 6.203  | 7.197  |
| ATOM | 389 | HD2     | TYR | A  | 23      | -5.807  | 6.731  | 7.791  |
| ATOM | 390 | C       | TYR | A  | 23      | -5.716  | 5.004  | 10.097 |
| ATOM | 391 | O       | TYR | A  | 23      | -6.611  | 5.849  | 10.191 |
| ATOM | 392 | N       | ILE | A  | 24      | -4.476  | 5.216  | 10.560 |
| ATOM | 393 | H       | ILE | A  | 24      | -3.799  | 4.468  | 10.460 |

|      |     |      |     |   |    |        |       |        |
|------|-----|------|-----|---|----|--------|-------|--------|
| ATOM | 394 | CA   | ILE | A | 24 | -4.026 | 6.497 | 11.144 |
| ATOM | 395 | HA   | ILE | A | 24 | -4.848 | 7.211 | 11.091 |
| ATOM | 396 | CB   | ILE | A | 24 | -3.666 | 6.352 | 12.644 |
| ATOM | 397 | HB   | ILE | A | 24 | -3.338 | 7.334 | 12.995 |
| ATOM | 398 | CG2  | ILE | A | 24 | -4.935 | 5.991 | 13.439 |
| ATOM | 399 | HG21 | ILE | A | 24 | -4.748 | 6.082 | 14.507 |
| ATOM | 400 | HG22 | ILE | A | 24 | -5.746 | 6.673 | 13.181 |
| ATOM | 401 | HG23 | ILE | A | 24 | -5.248 | 4.971 | 13.216 |
| ATOM | 402 | CG1  | ILE | A | 24 | -2.518 | 5.352 | 12.904 |
| ATOM | 403 | HG12 | ILE | A | 24 | -2.857 | 4.341 | 12.682 |
| ATOM | 404 | HG13 | ILE | A | 24 | -1.684 | 5.588 | 12.244 |
| ATOM | 405 | CD1  | ILE | A | 24 | -2.000 | 5.395 | 14.348 |
| ATOM | 406 | HD11 | ILE | A | 24 | -2.770 | 5.063 | 15.043 |
| ATOM | 407 | HD12 | ILE | A | 24 | -1.141 | 4.734 | 14.449 |
| ATOM | 408 | HD13 | ILE | A | 24 | -1.693 | 6.409 | 14.605 |
| ATOM | 409 | C    | ILE | A | 24 | -2.908 | 7.182 | 10.340 |
| ATOM | 410 | O    | ILE | A | 24 | -2.581 | 8.333 | 10.632 |
| ATOM | 411 | N    | GLY | C | 25 | -2.316 | 6.535 | 9.329  |
| ATOM | 412 | H    | GLY | C | 25 | -2.570 | 5.576 | 9.134  |
| ATOM | 413 | CA   | GLY | C | 25 | -1.346 | 7.180 | 8.433  |
| ATOM | 414 | HA2  | GLY | C | 25 | -1.880 | 7.862 | 7.772  |
| ATOM | 415 | HA3  | GLY | C | 25 | -0.669 | 7.800 | 9.016  |
| ATOM | 416 | C    | GLY | C | 25 | -0.509 | 6.231 | 7.575  |
| ATOM | 417 | O    | GLY | C | 25 | -0.622 | 5.008 | 7.671  |
| ATOM | 418 | N    | GLU | C | 26 | 0.349  | 6.809 | 6.735  |
| ATOM | 419 | H    | GLU | C | 26 | 0.436  | 7.821 | 6.790  |
| ATOM | 420 | CA   | GLU | C | 26 | 1.348  | 6.082 | 5.940  |
| ATOM | 421 | HA   | GLU | C | 26 | 0.872  | 5.235 | 5.442  |
| ATOM | 422 | CB   | GLU | C | 26 | 1.944  | 7.010 | 4.866  |
| ATOM | 423 | HB2  | GLU | C | 26 | 2.394  | 7.868 | 5.367  |
| ATOM | 424 | HB3  | GLU | C | 26 | 2.735  | 6.475 | 4.348  |
| ATOM | 425 | CG   | GLU | C | 26 | 0.957  | 7.532 | 3.814  |
| ATOM | 426 | HG2  | GLU | C | 26 | 0.090  | 7.969 | 4.304  |
| ATOM | 427 | HG3  | GLU | C | 26 | 1.449  | 8.326 | 3.250  |
| ATOM | 428 | CD   | GLU | C | 26 | 0.518  | 6.448 | 2.832  |
| ATOM | 429 | OE1  | GLU | C | 26 | 1.325  | 6.084 | 1.948  |
| ATOM | 430 | OE2  | GLU | C | 26 | -0.641 | 5.974 | 2.912  |
| ATOM | 431 | C    | GLU | C | 26 | 2.469  | 5.561 | 6.859  |
| ATOM | 432 | O    | GLU | C | 26 | 2.776  | 6.196 | 7.873  |
| ATOM | 433 | N    | GLY | C | 27 | 3.095  | 4.426 | 6.525  |
| ATOM | 434 | H    | GLY | C | 27 | 2.849  | 3.965 | 5.658  |
| ATOM | 435 | CA   | GLY | C | 27 | 4.139  | 3.813 | 7.358  |
| ATOM | 436 | HA2  | GLY | C | 27 | 4.740  | 4.589 | 7.831  |
| ATOM | 437 | HA3  | GLY | C | 27 | 3.669  | 3.244 | 8.154  |
| ATOM | 438 | C    | GLY | C | 27 | 5.042  | 2.853 | 6.600  |
| ATOM | 439 | O    | GLY | C | 27 | 4.630  | 1.749 | 6.261  |
| ATOM | 440 | N    | ALA | C | 28 | 6.286  | 3.269 | 6.369  |
| ATOM | 441 | H    | ALA | C | 28 | 6.501  | 4.225 | 6.634  |
| ATOM | 442 | CA   | ALA | C | 28 | 7.309  | 2.571 | 5.591  |
| ATOM | 443 | HA   | ALA | C | 28 | 8.148  | 3.251 | 5.450  |
| ATOM | 444 | CB   | ALA | C | 28 | 7.826  | 1.356 | 6.391  |
| ATOM | 445 | HB1  | ALA | C | 28 | 8.659  | 0.884 | 5.868  |
| ATOM | 446 | HB2  | ALA | C | 28 | 8.180  | 1.682 | 7.368  |
| ATOM | 447 | HB3  | ALA | C | 28 | 7.030  | 0.624 | 6.529  |
| ATOM | 448 | C    | ALA | C | 28 | 6.788  | 2.268 | 4.174  |
| ATOM | 449 | O    | ALA | C | 28 | 6.124  | 3.105 | 3.555  |
| ATOM | 450 | N    | TYR | C | 29 | 7.047  | 1.068 | 3.657  |

|      |     |         |     |    |        |        |        |        |
|------|-----|---------|-----|----|--------|--------|--------|--------|
| ATOM | 451 | H       | TYR | C  | 29     | 7.609  | 0.428  | 4.194  |
| ATOM | 452 | CA      | TYR | C  | 29     | 6.460  | 0.554  | 2.415  |
| ATOM | 453 | HA      | TYR | C  | 29     | 6.348  | 1.380  | 1.711  |
| ATOM | 454 | CB      | TYR | C  | 29     | 7.432  | -0.462 | 1.782  |
| ATOM | 455 | HB2     | TYR | C  | 29     | 7.381  | -1.399 | 2.335  |
| ATOM | 456 | HB3     | TYR | C  | 29     | 7.112  | -0.670 | 0.758  |
| ATOM | 457 | CG      | TYR | C  | 29     | 8.879  | 0.005  | 1.760  |
| ATOM | 458 | CD1     | TYR | C  | 29     | 9.274  | 1.053  | 0.908  |
| ATOM | 459 | HD1     | TYR | C  | 29     | 8.553  | 1.502  | 0.237  |
| ATOM | 460 | CE1     | TYR | C  | 29     | 10.600 | 1.526  | 0.931  |
| ATOM | 461 | HE1     | TYR | C  | 29     | 10.895 | 2.329  | 0.274  |
| ATOM | 462 | CZ      | TYR | C  | 29     | 11.541 | 0.944  | 1.809  |
| ATOM | 463 | OH      | TYR | C  | 29     | 12.822 | 1.400  | 1.873  |
| ATOM | 464 | HH      | TYR | C  | 29     | 13.038 | 2.048  | 1.183  |
| ATOM | 465 | CE2     | TYR | C  | 29     | 11.139 | -0.100 | 2.670  |
| ATOM | 466 | HE2     | TYR | C  | 29     | 11.850 | -0.554 | 3.344  |
| ATOM | 467 | CD2     | TYR | C  | 29     | 9.815  | -0.569 | 2.643  |
| ATOM | 468 | HD2     | TYR | C  | 29     | 9.519  | -1.372 | 3.304  |
| ATOM | 469 | C       | TYR | C  | 29     | 5.044  | -0.009 | 2.683  |
| ATOM | 470 | O       | TYR | C  | 29     | 4.801  | -1.212 | 2.552  |
| ATOM | 471 | N       | GLY | C  | 30     | 4.141  | 0.854  | 3.170  |
| ATOM | 472 | H       | GLY | C  | 30     | 4.432  | 1.821  | 3.270  |
| ATOM | 473 | CA      | GLY | C  | 30     | 2.805  | 0.493  | 3.661  |
| ATOM | 474 | HA2     | GLY | C  | 30     | 2.160  | 0.293  | 2.805  |
| ATOM | 475 | HA3     | GLY | C  | 30     | 2.864  | -0.437 | 4.221  |
| ATOM | 476 | C       | GLY | C  | 30     | 2.135  | 1.580  | 4.511  |
| ATOM | 477 | O       | GLY | C  | 30     | 2.137  | 2.753  | 4.130  |
| ATOM | 478 | N       | MET | A  | 31     | 1.514  | 1.195  | 5.630  |
| ATOM | 479 | H       | MET | A  | 31     | 1.701  | 0.254  | 5.966  |
| ATOM | 480 | CA      | MET | A  | 31     | 0.597  | 2.035  | 6.427  |
| ATOM | 481 | HA      | MET | A  | 31     | 0.926  | 3.068  | 6.364  |
| ATOM | 482 | CB      | MET | A  | 31     | -0.828 | 1.981  | 5.838  |
| ATOM | 483 | HB2     | MET | A  | 31     | -1.498 | 2.544  | 6.489  |
| ATOM | 484 | HB3     | MET | A  | 31     | -0.823 | 2.465  | 4.861  |
| ATOM | 485 | CG      | MET | A  | 31     | -1.376 | 0.554  | 5.682  |
| ATOM | 486 | HG2     | MET | A  | 31     | -0.831 | 0.053  | 4.881  |
| ATOM | 487 | HG3     | MET | A  | 31     | -1.176 | 0.011  | 6.604  |
| ATOM | 488 | SD      | MET | A  | 31     | -3.157 | 0.409  | 5.361  |
| ATOM | 489 | CE      | MET | A  | 31     | -3.298 | 1.344  | 3.814  |
| ATOM | 490 | HE1     | MET | A  | 31     | -3.141 | 2.405  | 3.988  |
| ATOM | 491 | HE2     | MET | A  | 31     | -2.561 | 0.999  | 3.096  |
| ATOM | 492 | HE3     | MET | A  | 31     | -4.292 | 1.212  | 3.388  |
| ATOM | 493 | C       | MET | A  | 31     | 0.594  | 1.662  | 7.918  |
| ATOM | 494 | O       | MET | A  | 31     | 0.844  | 0.511  | 8.264  |
| ATOM | 495 | N       | VAL | C  | 32     | 0.267  | 2.619  | 8.789  |
| ATOM | 496 | H       | VAL | C  | 32     | -0.002 | 3.525  | 8.412  |
| ATOM | 497 | CA      | VAL | C  | 32     | 0.050  | 2.412  | 10.231 |
| ATOM | 498 | HA      | VAL | C  | 32     | 0.439  | 1.434  | 10.507 |
| ATOM | 499 | CB      | VAL | C  | 32     | 0.759  | 3.466  | 11.116 |
| ATOM | 500 | HB      | VAL | C  | 32     | 0.294  | 4.438  | 10.946 |
| ATOM | 501 | CG1     | VAL | C  | 32     | 0.625  | 3.112  | 12.609 |
| ATOM | 502 | HG11VAL | C   | 32 | 1.069  | 2.134  | 12.804 |        |
| ATOM | 503 | HG12VAL | C   | 32 | 1.131  | 3.862  | 13.218 |        |
| ATOM | 504 | HG13VAL | C   | 32 | -0.423 | 3.087  | 12.904 |        |
| ATOM | 505 | CG2     | VAL | C  | 32     | 2.256  | 3.585  | 10.795 |
| ATOM | 506 | HG21VAL | C   | 32 | 2.738  | 2.615  | 10.906 |        |
| ATOM | 507 | HG22VAL | C   | 32 | 2.388  | 3.948  | 9.778  |        |

|      |     |         |     |    |       |         |        |        |
|------|-----|---------|-----|----|-------|---------|--------|--------|
| ATOM | 508 | HG23VAL | C   | 32 | 2.729 | 4.296   | 11.472 |        |
| ATOM | 509 | C       | VAL | C  | 32    | -1.453  | 2.453  | 10.517 |
| ATOM | 510 | O       | VAL | C  | 32    | -2.142  | 3.405  | 10.136 |
| ATOM | 511 | N       | CYS | A  | 33    | -1.943  | 1.439  | 11.232 |
| ATOM | 512 | H       | CYS | A  | 33    | -1.311  | 0.676  | 11.477 |
| ATOM | 513 | CA      | CYS | A  | 33    | -3.314  | 1.371  | 11.738 |
| ATOM | 514 | HA      | CYS | A  | 33    | -3.859  | 2.262  | 11.432 |
| ATOM | 515 | CB      | CYS | A  | 33    | -4.012  | 0.153  | 11.118 |
| ATOM | 516 | HB2     | CYS | A  | 33    | -3.402  | -0.739 | 11.282 |
| ATOM | 517 | HB3     | CYS | A  | 33    | -4.989  | 0.008  | 11.586 |
| ATOM | 518 | SG      | CYS | A  | 33    | -4.234  | 0.454  | 9.340  |
| ATOM | 519 | HG      | CYS | A  | 33    | -4.608  | -0.789 | 9.002  |
| ATOM | 520 | C       | CYS | A  | 33    | -3.348  | 1.328  | 13.271 |
| ATOM | 521 | O       | CYS | A  | 33    | -2.491  | 0.721  | 13.908 |
| ATOM | 522 | N       | SER | A  | 34    | -4.357  | 1.953  | 13.864 |
| ATOM | 523 | H       | SER | A  | 34    | -5.080  | 2.329  | 13.255 |
| ATOM | 524 | CA      | SER | A  | 34    | -4.694  | 1.778  | 15.279 |
| ATOM | 525 | HA      | SER | A  | 34    | -3.785  | 1.634  | 15.864 |
| ATOM | 526 | CB      | SER | A  | 34    | -5.391  | 3.037  | 15.798 |
| ATOM | 527 | HB2     | SER | A  | 34    | -4.768  | 3.907  | 15.597 |
| ATOM | 528 | HB3     | SER | A  | 34    | -6.346  | 3.157  | 15.283 |
| ATOM | 529 | OG      | SER | A  | 34    | -5.609  | 2.948  | 17.191 |
| ATOM | 530 | HG      | SER | A  | 34    | -6.489  | 3.345  | 17.371 |
| ATOM | 531 | C       | SER | A  | 34    | -5.596  | 0.546  | 15.460 |
| ATOM | 532 | O       | SER | A  | 34    | -6.372  | 0.208  | 14.560 |
| ATOM | 533 | N       | ALA | A  | 35    | -5.502  | -0.121 | 16.616 |
| ATOM | 534 | H       | ALA | A  | 35    | -4.865  | 0.235  | 17.319 |
| ATOM | 535 | CA      | ALA | A  | 35    | -6.227  | -1.348 | 16.953 |
| ATOM | 536 | HA      | ALA | A  | 35    | -7.273  | -1.231 | 16.663 |
| ATOM | 537 | CB      | ALA | A  | 35    | -5.620  | -2.518 | 16.164 |
| ATOM | 538 | HB1     | ALA | A  | 35    | -5.646  | -2.285 | 15.104 |
| ATOM | 539 | HB2     | ALA | A  | 35    | -4.585  | -2.676 | 16.466 |
| ATOM | 540 | HB3     | ALA | A  | 35    | -6.192  | -3.429 | 16.341 |
| ATOM | 541 | C       | ALA | A  | 35    | -6.188  | -1.637 | 18.461 |
| ATOM | 542 | O       | ALA | A  | 35    | -5.353  | -1.099 | 19.192 |
| ATOM | 543 | N       | TYR | A  | 36    | -7.054  | -2.536 | 18.925 |
| ATOM | 544 | H       | TYR | A  | 36    | -7.717  | -2.941 | 18.269 |
| ATOM | 545 | CA      | TYR | A  | 36    | -7.076  | -3.040 | 20.300 |
| ATOM | 546 | HA      | TYR | A  | 36    | -6.404  | -2.456 | 20.922 |
| ATOM | 547 | CB      | TYR | A  | 36    | -8.494  | -2.853 | 20.853 |
| ATOM | 548 | HB2     | TYR | A  | 36    | -8.761  | -1.799 | 20.760 |
| ATOM | 549 | HB3     | TYR | A  | 36    | -9.192  | -3.415 | 20.230 |
| ATOM | 550 | CG      | TYR | A  | 36    | -8.670  | -3.264 | 22.303 |
| ATOM | 551 | CD1     | TYR | A  | 36    | -8.181  | -2.441 | 23.338 |
| ATOM | 552 | HD1     | TYR | A  | 36    | -7.665  | -1.522 | 23.101 |
| ATOM | 553 | CE1     | TYR | A  | 36    | -8.398  | -2.793 | 24.685 |
| ATOM | 554 | HE1     | TYR | A  | 36    | -8.048  | -2.146 | 25.474 |
| ATOM | 555 | CZ      | TYR | A  | 36    | -9.112  | -3.970 | 24.999 |
| ATOM | 556 | OH      | TYR | A  | 36    | -9.369  | -4.296 | 26.294 |
| ATOM | 557 | HH      | TYR | A  | 36    | -9.162  | -3.587 | 26.916 |
| ATOM | 558 | CE2     | TYR | A  | 36    | -9.559  | -4.817 | 23.963 |
| ATOM | 559 | HE2     | TYR | A  | 36    | -10.094 | -5.724 | 24.202 |
| ATOM | 560 | CD2     | TYR | A  | 36    | -9.341  | -4.459 | 22.621 |
| ATOM | 561 | HD2     | TYR | A  | 36    | -9.708  | -5.093 | 21.827 |
| ATOM | 562 | C       | TYR | A  | 36    | -6.621  | -4.509 | 20.369 |
| ATOM | 563 | O       | TYR | A  | 36    | -7.198  | -5.376 | 19.715 |
| ATOM | 564 | N       | ASP | A  | 37    | -5.593  | -4.781 | 21.178 |

|      |     |      |     |   |    |         |         |        |
|------|-----|------|-----|---|----|---------|---------|--------|
| ATOM | 565 | H    | ASP | A | 37 | -5.190  | -4.011  | 21.694 |
| ATOM | 566 | CA   | ASP | A | 37 | -5.158  | -6.122  | 21.578 |
| ATOM | 567 | HA   | ASP | A | 37 | -5.226  | -6.803  | 20.727 |
| ATOM | 568 | CB   | ASP | A | 37 | -3.686  | -6.046  | 22.033 |
| ATOM | 569 | HB2  | ASP | A | 37 | -3.104  | -5.604  | 21.222 |
| ATOM | 570 | HB3  | ASP | A | 37 | -3.612  | -5.373  | 22.888 |
| ATOM | 571 | CG   | ASP | A | 37 | -3.035  | -7.384  | 22.417 |
| ATOM | 572 | OD1  | ASP | A | 37 | -3.735  | -8.385  | 22.698 |
| ATOM | 573 | OD2  | ASP | A | 37 | -1.784  | -7.423  | 22.470 |
| ATOM | 574 | C    | ASP | A | 37 | -6.079  | -6.616  | 22.701 |
| ATOM | 575 | O    | ASP | A | 37 | -6.059  | -6.072  | 23.808 |
| ATOM | 576 | N    | ASN | A | 38 | -6.887  | -7.638  | 22.407 |
| ATOM | 577 | H    | ASN | A | 38 | -6.843  | -8.013  | 21.464 |
| ATOM | 578 | CA   | ASN | A | 38 | -7.886  | -8.206  | 23.319 |
| ATOM | 579 | HA   | ASN | A | 38 | -8.338  | -7.399  | 23.898 |
| ATOM | 580 | CB   | ASN | A | 38 | -8.996  | -8.900  | 22.513 |
| ATOM | 581 | HB2  | ASN | A | 38 | -8.559  | -9.643  | 21.845 |
| ATOM | 582 | HB3  | ASN | A | 38 | -9.660  | -9.423  | 23.202 |
| ATOM | 583 | CG   | ASN | A | 38 | -9.842  | -7.922  | 21.710 |
| ATOM | 584 | OD1  | ASN | A | 38 | -10.903 | -7.492  | 22.149 |
| ATOM | 585 | ND2  | ASN | A | 38 | -9.385  | -7.535  | 20.536 |
| ATOM | 586 | HD21 | ASN | A | 38 | -9.898  | -6.836  | 20.016 |
| ATOM | 587 | HD22 | ASN | A | 38 | -8.495  | -7.881  | 20.200 |
| ATOM | 588 | C    | ASN | A | 38 | -7.284  | -9.213  | 24.311 |
| ATOM | 589 | O    | ASN | A | 38 | -7.890  | -9.480  | 25.348 |
| ATOM | 590 | N    | LEU | A | 39 | -6.098  | -9.764  | 24.022 |
| ATOM | 591 | H    | LEU | A | 39 | -5.616  | -9.440  | 23.189 |
| ATOM | 592 | CA   | LEU | A | 39 | -5.386  | -10.661 | 24.938 |
| ATOM | 593 | HA   | LEU | A | 39 | -6.102  | -11.348 | 25.395 |
| ATOM | 594 | CB   | LEU | A | 39 | -4.341  | -11.468 | 24.138 |
| ATOM | 595 | HB2  | LEU | A | 39 | -4.866  | -12.083 | 23.407 |
| ATOM | 596 | HB3  | LEU | A | 39 | -3.696  | -10.778 | 23.595 |
| ATOM | 597 | CG   | LEU | A | 39 | -3.439  | -12.384 | 24.989 |
| ATOM | 598 | HG   | LEU | A | 39 | -2.870  | -11.776 | 25.692 |
| ATOM | 599 | CD1  | LEU | A | 39 | -4.254  | -13.408 | 25.787 |
| ATOM | 600 | HD11 | LEU | A | 39 | -4.879  | -12.909 | 26.527 |
| ATOM | 601 | HD12 | LEU | A | 39 | -4.880  | -13.996 | 25.115 |
| ATOM | 602 | HD13 | LEU | A | 39 | -3.575  | -14.075 | 26.312 |
| ATOM | 603 | CD2  | LEU | A | 39 | -2.436  | -13.106 | 24.078 |
| ATOM | 604 | HD21 | LEU | A | 39 | -1.828  | -12.375 | 23.543 |
| ATOM | 605 | HD22 | LEU | A | 39 | -1.778  | -13.738 | 24.677 |
| ATOM | 606 | HD23 | LEU | A | 39 | -2.966  | -13.728 | 23.356 |
| ATOM | 607 | C    | LEU | A | 39 | -4.756  | -9.843  | 26.064 |
| ATOM | 608 | O    | LEU | A | 39 | -5.031  | -10.079 | 27.241 |
| ATOM | 609 | N    | ASN | A | 40 | -3.962  | -8.836  | 25.695 |
| ATOM | 610 | H    | ASN | A | 40 | -3.788  | -8.696  | 24.703 |
| ATOM | 611 | CA   | ASN | A | 40 | -3.333  | -7.930  | 26.652 |
| ATOM | 612 | HA   | ASN | A | 40 | -3.059  | -8.504  | 27.532 |
| ATOM | 613 | CB   | ASN | A | 40 | -2.053  | -7.361  | 26.033 |
| ATOM | 614 | HB2  | ASN | A | 40 | -2.301  | -6.864  | 25.097 |
| ATOM | 615 | HB3  | ASN | A | 40 | -1.639  | -6.608  | 26.702 |
| ATOM | 616 | CG   | ASN | A | 40 | -0.968  | -8.408  | 25.792 |
| ATOM | 617 | OD1  | ASN | A | 40 | -0.846  | -9.401  | 26.501 |
| ATOM | 618 | ND2  | ASN | A | 40 | -0.130  | -8.196  | 24.798 |
| ATOM | 619 | HD21 | ASN | A | 40 | 0.681   | -8.790  | 24.720 |
| ATOM | 620 | HD22 | ASN | A | 40 | -0.273  | -7.410  | 24.180 |
| ATOM | 621 | C    | ASN | A | 40 | -4.271  | -6.809  | 27.143 |

|      |     |         |     |    |        |         |         |        |
|------|-----|---------|-----|----|--------|---------|---------|--------|
| ATOM | 622 | O       | ASN | A  | 40     | -3.952  | -6.134  | 28.118 |
| ATOM | 623 | N       | LYS | A  | 41     | -5.418  | -6.606  | 26.486 |
| ATOM | 624 | H       | LYS | A  | 41     | -5.582  | -7.169  | 25.663 |
| ATOM | 625 | CA      | LYS | A  | 41     | -6.495  | -5.666  | 26.846 |
| ATOM | 626 | HA      | LYS | A  | 41     | -7.243  | -5.723  | 26.054 |
| ATOM | 627 | CB      | LYS | A  | 41     | -7.198  | -6.094  | 28.149 |
| ATOM | 628 | HB2     | LYS | A  | 41     | -6.476  | -6.144  | 28.962 |
| ATOM | 629 | HB3     | LYS | A  | 41     | -7.958  | -5.354  | 28.408 |
| ATOM | 630 | CG      | LYS | A  | 41     | -7.889  | -7.453  | 27.984 |
| ATOM | 631 | HG2     | LYS | A  | 41     | -8.576  | -7.413  | 27.140 |
| ATOM | 632 | HG3     | LYS | A  | 41     | -7.142  | -8.222  | 27.790 |
| ATOM | 633 | CD      | LYS | A  | 41     | -8.678  | -7.829  | 29.238 |
| ATOM | 634 | HD2     | LYS | A  | 41     | -8.034  | -7.735  | 30.115 |
| ATOM | 635 | HD3     | LYS | A  | 41     | -9.535  | -7.163  | 29.348 |
| ATOM | 636 | CE      | LYS | A  | 41     | -9.155  | -9.278  | 29.111 |
| ATOM | 637 | HE2     | LYS | A  | 41     | -9.776  | -9.385  | 28.217 |
| ATOM | 638 | HE3     | LYS | A  | 41     | -8.277  | -9.921  | 28.993 |
| ATOM | 639 | NZ      | LYS | A  | 41     | -9.914  | -9.708  | 30.308 |
| ATOM | 640 | HZ1     | LYS | A  | 41     | -9.506  | -9.319  | 31.158 |
| ATOM | 641 | HZ2     | LYS | A  | 41     | -10.885 | -9.401  | 30.282 |
| ATOM | 642 | HZ3     | LYS | A  | 41     | -9.895  | -10.721 | 30.399 |
| ATOM | 643 | C       | LYS | A  | 41     | -6.028  | -4.196  | 26.834 |
| ATOM | 644 | O       | LYS | A  | 41     | -6.228  | -3.447  | 27.797 |
| ATOM | 645 | N       | VAL | A  | 42     | -5.378  | -3.787  | 25.740 |
| ATOM | 646 | H       | VAL | A  | 42     | -5.369  | -4.438  | 24.956 |
| ATOM | 647 | CA      | VAL | A  | 42     | -4.733  | -2.464  | 25.542 |
| ATOM | 648 | HA      | VAL | A  | 42     | -5.280  | -1.715  | 26.120 |
| ATOM | 649 | CB      | VAL | A  | 42     | -3.254  | -2.458  | 26.019 |
| ATOM | 650 | HB      | VAL | A  | 42     | -2.801  | -1.535  | 25.662 |
| ATOM | 651 | CG1     | VAL | A  | 42     | -3.126  | -2.443  | 27.551 |
| ATOM | 652 | HG11VAL | A   | 42 | -3.509 | -3.371  | 27.979  |        |
| ATOM | 653 | HG12VAL | A   | 42 | -2.075 | -2.333  | 27.834  |        |
| ATOM | 654 | HG13VAL | A   | 42 | -3.683 | -1.597  | 27.955  |        |
| ATOM | 655 | CG2     | VAL | A  | 42     | -2.421  | -3.626  | 25.453 |
| ATOM | 656 | HG21VAL | A   | 42 | -1.385 | -3.543  | 25.790  |        |
| ATOM | 657 | HG22VAL | A   | 42 | -2.824 | -4.577  | 25.798  |        |
| ATOM | 658 | HG23VAL | A   | 42 | -2.432 | -3.607  | 24.363  |        |
| ATOM | 659 | C       | VAL | A  | 42     | -4.762  | -2.031  | 24.067 |
| ATOM | 660 | O       | VAL | A  | 42     | -4.785  | -2.888  | 23.186 |
| ATOM | 661 | N       | ARG | A  | 43     | -4.755  | -0.720  | 23.788 |
| ATOM | 662 | H       | ARG | A  | 43     | -4.717  | -0.060  | 24.555 |
| ATOM | 663 | CA      | ARG | A  | 43     | -4.711  | -0.190  | 22.419 |
| ATOM | 664 | HA      | ARG | A  | 43     | -5.277  | -0.873  | 21.790 |
| ATOM | 665 | CB      | ARG | A  | 43     | -5.406  | 1.184   | 22.360 |
| ATOM | 666 | HB2     | ARG | A  | 43     | -6.158  | 1.232   | 23.147 |
| ATOM | 667 | HB3     | ARG | A  | 43     | -4.678  | 1.975   | 22.524 |
| ATOM | 668 | CG      | ARG | A  | 43     | -6.111  | 1.410   | 21.015 |
| ATOM | 669 | HG2     | ARG | A  | 43     | -5.370  | 1.414   | 20.218 |
| ATOM | 670 | HG3     | ARG | A  | 43     | -6.796  | 0.587   | 20.826 |
| ATOM | 671 | CD      | ARG | A  | 43     | -6.893  | 2.733   | 20.940 |
| ATOM | 672 | HD2     | ARG | A  | 43     | -6.202  | 3.561   | 21.079 |
| ATOM | 673 | HD3     | ARG | A  | 43     | -7.335  | 2.843   | 19.949 |
| ATOM | 674 | NE      | ARG | A  | 43     | -7.950  | 2.850   | 21.962 |
| ATOM | 675 | HE      | ARG | A  | 43     | -7.812  | 3.580   | 22.656 |
| ATOM | 676 | CZ      | ARG | A  | 43     | -9.071  | 2.145   | 22.061 |
| ATOM | 677 | NH1     | ARG | A  | 43     | -9.405  | 1.208   | 21.200 |
| ATOM | 678 | HH11    | ARG | A  | 43     | -8.881  | 1.119   | 20.330 |

|      |     |         |   |    |         |        |        |
|------|-----|---------|---|----|---------|--------|--------|
| ATOM | 679 | HH12ARG | A | 43 | -10.255 | 0.686  | 21.320 |
| ATOM | 680 | NH2 ARG | A | 43 | -9.873  | 2.364  | 23.078 |
| ATOM | 681 | HH21ARG | A | 43 | -9.697  | 3.130  | 23.727 |
| ATOM | 682 | HH22ARG | A | 43 | -10.672 | 1.770  | 23.251 |
| ATOM | 683 | C ARG   | A | 43 | -3.268  | -0.151 | 21.892 |
| ATOM | 684 | O ARG   | A | 43 | -2.329  | 0.118  | 22.649 |
| ATOM | 685 | N VAL   | A | 44 | -3.087  | -0.418 | 20.604 |
| ATOM | 686 | H VAL   | A | 44 | -3.923  | -0.588 | 20.043 |
| ATOM | 687 | CA VAL  | A | 44 | -1.794  | -0.563 | 19.908 |
| ATOM | 688 | HA VAL  | A | 44 | -1.010  | -0.107 | 20.515 |
| ATOM | 689 | CB VAL  | A | 44 | -1.427  | -2.056 | 19.683 |
| ATOM | 690 | HB VAL  | A | 44 | -0.519  | -2.094 | 19.086 |
| ATOM | 691 | CG1 VAL | A | 44 | -1.113  | -2.756 | 21.014 |
| ATOM | 692 | HG11VAL | A | 44 | -0.792  | -3.783 | 20.830 |
| ATOM | 693 | HG12VAL | A | 44 | -0.304  | -2.222 | 21.507 |
| ATOM | 694 | HG13VAL | A | 44 | -1.992  | -2.769 | 21.661 |
| ATOM | 695 | CG2 VAL | A | 44 | -2.502  | -2.865 | 18.932 |
| ATOM | 696 | HG21VAL | A | 44 | -2.735  | -2.387 | 17.981 |
| ATOM | 697 | HG22VAL | A | 44 | -2.129  | -3.871 | 18.729 |
| ATOM | 698 | HG23VAL | A | 44 | -3.409  | -2.945 | 19.531 |
| ATOM | 699 | C VAL   | A | 44 | -1.810  | 0.149  | 18.547 |
| ATOM | 700 | O VAL   | A | 44 | -2.879  | 0.447  | 18.014 |
| ATOM | 701 | N ALA   | A | 45 | -0.623  | 0.393  | 17.987 |
| ATOM | 702 | H ALA   | A | 45 | 0.212   | 0.081  | 18.482 |
| ATOM | 703 | CA ALA  | A | 45 | -0.423  | 0.757  | 16.588 |
| ATOM | 704 | HA ALA  | A | 45 | -1.386  | 0.941  | 16.114 |
| ATOM | 705 | CB ALA  | A | 45 | 0.416   | 2.037  | 16.510 |
| ATOM | 706 | HB1 ALA | A | 45 | -0.103  | 2.855  | 17.003 |
| ATOM | 707 | HB2 ALA | A | 45 | 1.380   | 1.875  | 16.994 |
| ATOM | 708 | HB3 ALA | A | 45 | 0.579   | 2.301  | 15.465 |
| ATOM | 709 | C ALA   | A | 45 | 0.267   | -0.402 | 15.854 |
| ATOM | 710 | O ALA   | A | 45 | 1.233   | -0.976 | 16.360 |
| ATOM | 711 | N ILE   | A | 46 | -0.217  | -0.743 | 14.660 |
| ATOM | 712 | H ILE   | A | 46 | -1.001  | -0.210 | 14.290 |
| ATOM | 713 | CA ILE  | A | 46 | 0.335   | -1.821 | 13.828 |
| ATOM | 714 | HA ILE  | A | 46 | 1.213   | -2.235 | 14.321 |
| ATOM | 715 | CB ILE  | A | 46 | -0.681  | -2.978 | 13.649 |
| ATOM | 716 | HB ILE  | A | 46 | -1.532  | -2.613 | 13.072 |
| ATOM | 717 | CG2 ILE | A | 46 | -0.011  | -4.122 | 12.861 |
| ATOM | 718 | HG21ILE | A | 46 | 0.355   | -3.764 | 11.899 |
| ATOM | 719 | HG22ILE | A | 46 | 0.824   | -4.531 | 13.433 |
| ATOM | 720 | HG23ILE | A | 46 | -0.730  | -4.915 | 12.660 |
| ATOM | 721 | CG1 ILE | A | 46 | -1.208  | -3.468 | 15.020 |
| ATOM | 722 | HG12ILE | A | 46 | -0.361  | -3.696 | 15.660 |
| ATOM | 723 | HG13ILE | A | 46 | -1.765  | -2.661 | 15.494 |
| ATOM | 724 | CD1 ILE | A | 46 | -2.135  | -4.689 | 14.976 |
| ATOM | 725 | HD11ILE | A | 46 | -1.577  | -5.580 | 14.688 |
| ATOM | 726 | HD12ILE | A | 46 | -2.558  | -4.851 | 15.969 |
| ATOM | 727 | HD13ILE | A | 46 | -2.942  | -4.510 | 14.266 |
| ATOM | 728 | C ILE   | A | 46 | 0.782   | -1.238 | 12.487 |
| ATOM | 729 | O ILE   | A | 46 | -0.049  | -0.758 | 11.715 |
| ATOM | 730 | N LYS   | C | 47 | 2.086   | -1.298 | 12.197 |
| ATOM | 731 | H LYS   | C | 47 | 2.698   | -1.740 | 12.877 |
| ATOM | 732 | CA LYS  | C | 47 | 2.654   | -0.881 | 10.908 |
| ATOM | 733 | HA LYS  | C | 47 | 1.998   | -0.124 | 10.476 |
| ATOM | 734 | CB LYS  | C | 47 | 4.041   | -0.219 | 11.134 |
| ATOM | 735 | HB2 LYS | C | 47 | 3.932   | 0.508  | 11.941 |

|      |     |      |     |   |    |        |        |        |
|------|-----|------|-----|---|----|--------|--------|--------|
| ATOM | 736 | HB3  | LYS | C | 47 | 4.769  | -0.970 | 11.448 |
| ATOM | 737 | CG   | LYS | C | 47 | 4.565  | 0.524  | 9.884  |
| ATOM | 738 | HG2  | LYS | C | 47 | 4.940  | -0.203 | 9.165  |
| ATOM | 739 | HG3  | LYS | C | 47 | 3.723  | 1.035  | 9.415  |
| ATOM | 740 | CD   | LYS | C | 47 | 5.655  | 1.587  | 10.154 |
| ATOM | 741 | HD2  | LYS | C | 47 | 5.724  | 2.217  | 9.270  |
| ATOM | 742 | HD3  | LYS | C | 47 | 5.337  | 2.229  | 10.977 |
| ATOM | 743 | CE   | LYS | C | 47 | 7.059  | 1.037  | 10.454 |
| ATOM | 744 | HE2  | LYS | C | 47 | 7.044  | 0.525  | 11.420 |
| ATOM | 745 | HE3  | LYS | C | 47 | 7.331  | 0.307  | 9.687  |
| ATOM | 746 | NZ   | LYS | C | 47 | 8.083  | 2.119  | 10.471 |
| ATOM | 747 | HZ1  | LYS | C | 47 | 7.878  | 2.840  | 11.168 |
| ATOM | 748 | HZ2  | LYS | C | 47 | 9.018  | 1.744  | 10.624 |
| ATOM | 749 | HZ3  | LYS | C | 47 | 8.114  | 2.615  | 9.596  |
| ATOM | 750 | C    | LYS | C | 47 | 2.664  | -2.077 | 9.935  |
| ATOM | 751 | O    | LYS | C | 47 | 3.489  | -2.987 | 10.066 |
| ATOM | 752 | N    | LYS | A | 48 | 1.742  | -2.087 | 8.966  |
| ATOM | 753 | H    | LYS | A | 48 | 1.128  | -1.279 | 8.918  |
| ATOM | 754 | CA   | LYS | A | 48 | 1.734  | -2.994 | 7.807  |
| ATOM | 755 | HA   | LYS | A | 48 | 1.961  | -4.011 | 8.133  |
| ATOM | 756 | CB   | LYS | A | 48 | 0.338  | -2.979 | 7.151  |
| ATOM | 757 | HB2  | LYS | A | 48 | -0.379 | -3.344 | 7.883  |
| ATOM | 758 | HB3  | LYS | A | 48 | 0.078  | -1.950 | 6.897  |
| ATOM | 759 | CG   | LYS | A | 48 | 0.221  | -3.847 | 5.881  |
| ATOM | 760 | HG2  | LYS | A | 48 | 0.972  | -3.548 | 5.151  |
| ATOM | 761 | HG3  | LYS | A | 48 | 0.396  | -4.890 | 6.144  |
| ATOM | 762 | CD   | LYS | A | 48 | -1.170 | -3.698 | 5.242  |
| ATOM | 763 | HD2  | LYS | A | 48 | -1.924 | -3.861 | 6.011  |
| ATOM | 764 | HD3  | LYS | A | 48 | -1.288 | -2.684 | 4.853  |
| ATOM | 765 | CE   | LYS | A | 48 | -1.431 | -4.714 | 4.123  |
| ATOM | 766 | HE2  | LYS | A | 48 | -1.289 | -5.722 | 4.522  |
| ATOM | 767 | HE3  | LYS | A | 48 | -2.472 | -4.631 | 3.808  |
| ATOM | 768 | NZ   | LYS | A | 48 | -0.552 | -4.542 | 2.946  |
| ATOM | 769 | HZ1  | LYS | A | 48 | -0.636 | -5.354 | 2.342  |
| ATOM | 770 | HZ2  | LYS | A | 48 | -0.743 | -3.683 | 2.440  |
| ATOM | 771 | HZ3  | LYS | A | 48 | 0.424  | -4.552 | 3.225  |
| ATOM | 772 | C    | LYS | A | 48 | 2.798  | -2.547 | 6.799  |
| ATOM | 773 | O    | LYS | A | 48 | 2.867  | -1.369 | 6.452  |
| ATOM | 774 | N    | ILE | A | 49 | 3.601  | -3.483 | 6.301  |
| ATOM | 775 | H    | ILE | A | 49 | 3.522  | -4.430 | 6.656  |
| ATOM | 776 | CA   | ILE | A | 49 | 4.676  | -3.225 | 5.338  |
| ATOM | 777 | HA   | ILE | A | 49 | 4.471  | -2.288 | 4.816  |
| ATOM | 778 | CB   | ILE | A | 49 | 6.052  | -3.118 | 6.055  |
| ATOM | 779 | HB   | ILE | A | 49 | 6.396  | -4.128 | 6.282  |
| ATOM | 780 | CG2  | ILE | A | 49 | 7.070  | -2.461 | 5.102  |
| ATOM | 781 | HG21 | ILE | A | 49 | 8.073  | -2.512 | 5.523  |
| ATOM | 782 | HG22 | ILE | A | 49 | 7.091  | -2.976 | 4.145  |
| ATOM | 783 | HG23 | ILE | A | 49 | 6.800  | -1.419 | 4.938  |
| ATOM | 784 | CG1  | ILE | A | 49 | 5.997  | -2.342 | 7.395  |
| ATOM | 785 | HG12 | ILE | A | 49 | 5.638  | -1.330 | 7.211  |
| ATOM | 786 | HG13 | ILE | A | 49 | 5.298  | -2.836 | 8.068  |
| ATOM | 787 | CD1  | ILE | A | 49 | 7.325  | -2.270 | 8.154  |
| ATOM | 788 | HD11 | ILE | A | 49 | 7.152  | -1.834 | 9.137  |
| ATOM | 789 | HD12 | ILE | A | 49 | 7.736  | -3.273 | 8.279  |
| ATOM | 790 | HD13 | ILE | A | 49 | 8.033  | -1.643 | 7.617  |
| ATOM | 791 | C    | ILE | A | 49 | 4.694  | -4.360 | 4.313  |
| ATOM | 792 | O    | ILE | A | 49 | 4.619  | -5.528 | 4.695  |



|      |     |     |     |   |    |        |         |        |
|------|-----|-----|-----|---|----|--------|---------|--------|
| ATOM | 793 | N   | SER | A | 50 | 4.863  | -4.029  | 3.036  |
| ATOM | 794 | H   | SER | A | 50 | 4.827  | -3.042  | 2.790  |
| ATOM | 795 | CA  | SER | A | 50 | 5.021  | -4.975  | 1.921  |
| ATOM | 796 | HA  | SER | A | 50 | 4.834  | -5.994  | 2.262  |
| ATOM | 797 | CB  | SER | A | 50 | 3.974  | -4.647  | 0.831  |
| ATOM | 798 | HB2 | SER | A | 50 | 4.289  | -3.754  | 0.289  |
| ATOM | 799 | HB3 | SER | A | 50 | 3.924  | -5.479  | 0.125  |
| ATOM | 800 | OG  | SER | A | 50 | 2.674  | -4.388  | 1.354  |
| ATOM | 801 | HG  | SER | A | 50 | 2.425  | -5.131  | 1.965  |
| ATOM | 802 | C   | SER | A | 50 | 6.464  | -4.913  | 1.348  |
| ATOM | 803 | O   | SER | A | 50 | 6.654  | -4.494  | 0.206  |
| ATOM | 804 | N   | PRO | A | 51 | 7.523  | -5.240  | 2.122  |
| ATOM | 805 | CD  | PRO | A | 51 | 7.506  | -5.916  | 3.414  |
| ATOM | 806 | HD2 | PRO | A | 51 | 6.991  | -6.875  | 3.361  |
| ATOM | 807 | HD3 | PRO | A | 51 | 7.039  | -5.280  | 4.157  |
| ATOM | 808 | CG  | PRO | A | 51 | 8.967  | -6.099  | 3.817  |
| ATOM | 809 | HG2 | PRO | A | 51 | 9.362  | -7.019  | 3.387  |
| ATOM | 810 | HG3 | PRO | A | 51 | 9.095  | -6.091  | 4.899  |
| ATOM | 811 | CB  | PRO | A | 51 | 9.622  | -4.891  | 3.149  |
| ATOM | 812 | HB2 | PRO | A | 51 | 10.697 | -5.017  | 3.039  |
| ATOM | 813 | HB3 | PRO | A | 51 | 9.403  | -3.988  | 3.722  |
| ATOM | 814 | CA  | PRO | A | 51 | 8.895  | -4.831  | 1.803  |
| ATOM | 815 | HA  | PRO | A | 51 | 8.904  | -3.805  | 1.430  |
| ATOM | 816 | C   | PRO | A | 51 | 9.600  | -5.731  | 0.776  |
| ATOM | 817 | O   | PRO | A | 51 | 10.669 | -5.374  | 0.286  |
| ATOM | 818 | N   | PHE | A | 52 | 9.048  | -6.910  | 0.466  |
| ATOM | 819 | H   | PHE | A | 52 | 8.151  | -7.143  | 0.869  |
| ATOM | 820 | CA  | PHE | A | 52 | 9.745  | -7.967  | -0.277 |
| ATOM | 821 | HA  | PHE | A | 52 | 10.779 | -7.994  | 0.069  |
| ATOM | 822 | CB  | PHE | A | 52 | 9.100  | -9.321  | 0.060  |
| ATOM | 823 | HB2 | PHE | A | 52 | 8.152  | -9.399  | -0.474 |
| ATOM | 824 | HB3 | PHE | A | 52 | 9.744  | -10.118 | -0.310 |
| ATOM | 825 | CG  | PHE | A | 52 | 8.854  | -9.540  | 1.540  |
| ATOM | 826 | CD1 | PHE | A | 52 | 9.934  | -9.700  | 2.428  |
| ATOM | 827 | HD1 | PHE | A | 52 | 10.947 | -9.707  | 2.053  |
| ATOM | 828 | CE1 | PHE | A | 52 | 9.692  | -9.847  | 3.805  |
| ATOM | 829 | HE1 | PHE | A | 52 | 10.516 | -9.991  | 4.485  |
| ATOM | 830 | CZ  | PHE | A | 52 | 8.377  | -9.815  | 4.300  |
| ATOM | 831 | HZ  | PHE | A | 52 | 8.188  | -9.925  | 5.359  |
| ATOM | 832 | CE2 | PHE | A | 52 | 7.300  | -9.665  | 3.412  |
| ATOM | 833 | HE2 | PHE | A | 52 | 6.286  | -9.657  | 3.787  |
| ATOM | 834 | CD2 | PHE | A | 52 | 7.539  | -9.531  | 2.035  |
| ATOM | 835 | HD2 | PHE | A | 52 | 6.712  | -9.408  | 1.355  |
| ATOM | 836 | C   | PHE | A | 52 | 9.794  | -7.742  | -1.799 |
| ATOM | 837 | O   | PHE | A | 52 | 10.395 | -8.553  | -2.506 |
| ATOM | 838 | N   | GLU | A | 53 | 9.181  | -6.667  | -2.298 |
| ATOM | 839 | H   | GLU | A | 53 | 8.673  | -6.081  | -1.651 |
| ATOM | 840 | CA  | GLU | A | 53 | 9.089  | -6.349  | -3.728 |
| ATOM | 841 | HA  | GLU | A | 53 | 8.662  | -7.205  | -4.250 |
| ATOM | 842 | CB  | GLU | A | 53 | 8.169  | -5.131  | -3.940 |
| ATOM | 843 | HB2 | GLU | A | 53 | 8.648  | -4.250  | -3.514 |
| ATOM | 844 | HB3 | GLU | A | 53 | 8.055  | -4.962  | -5.011 |
| ATOM | 845 | CG  | GLU | A | 53 | 6.775  | -5.255  | -3.314 |
| ATOM | 846 | HG2 | GLU | A | 53 | 6.863  | -5.383  | -2.238 |
| ATOM | 847 | HG3 | GLU | A | 53 | 6.227  | -4.329  | -3.493 |
| ATOM | 848 | CD  | GLU | A | 53 | 5.985  | -6.423  | -3.885 |
| ATOM | 849 | OE1 | GLU | A | 53 | 6.209  | -7.574  | -3.453 |

|      |     |      |     |   |    |        |        |        |
|------|-----|------|-----|---|----|--------|--------|--------|
| ATOM | 850 | OE2  | GLU | A | 53 | 5.114  | -6.192 | -4.756 |
| ATOM | 851 | C    | GLU | A | 53 | 10.461 | -6.048 | -4.348 |
| ATOM | 852 | O    | GLU | A | 53 | 10.745 | -6.479 | -5.463 |
| ATOM | 853 | N    | HIE | A | 54 | 11.321 | -5.343 | -3.606 |
| ATOM | 854 | H    | HIE | A | 54 | 11.030 | -5.100 | -2.670 |
| ATOM | 855 | CA   | HIE | A | 54 | 12.619 | -4.823 | -4.048 |
| ATOM | 856 | HA   | HIE | A | 54 | 12.931 | -5.341 | -4.957 |
| ATOM | 857 | CB   | HIE | A | 54 | 12.429 | -3.333 | -4.373 |
| ATOM | 858 | HB2  | HIE | A | 54 | 11.603 | -3.231 | -5.079 |
| ATOM | 859 | HB3  | HIE | A | 54 | 12.155 | -2.806 | -3.462 |
| ATOM | 860 | CG   | HIE | A | 54 | 13.633 | -2.648 | -4.959 |
| ATOM | 861 | ND1  | HIE | A | 54 | 14.712 | -2.141 | -4.229 |
| ATOM | 862 | CE1  | HIE | A | 54 | 15.516 | -1.561 | -5.137 |
| ATOM | 863 | HE1  | HIE | A | 54 | 16.437 | -1.046 | -4.904 |
| ATOM | 864 | NE2  | HIE | A | 54 | 15.006 | -1.676 | -6.376 |
| ATOM | 865 | HE2  | HIE | A | 54 | 15.387 | -1.249 | -7.217 |
| ATOM | 866 | CD2  | HIE | A | 54 | 13.816 | -2.361 | -6.280 |
| ATOM | 867 | HD2  | HIE | A | 54 | 13.138 | -2.596 | -7.089 |
| ATOM | 868 | C    | HIE | A | 54 | 13.701 | -5.040 | -2.967 |
| ATOM | 869 | O    | HIE | A | 54 | 13.407 | -5.063 | -1.767 |
| ATOM | 870 | N    | GLN | A | 55 | 14.961 | -5.215 | -3.373 |
| ATOM | 871 | H    | GLN | A | 55 | 15.157 | -5.156 | -4.371 |
| ATOM | 872 | CA   | GLN | A | 55 | 16.055 | -5.584 | -2.472 |
| ATOM | 873 | HA   | GLN | A | 55 | 15.758 | -6.487 | -1.939 |
| ATOM | 874 | CB   | GLN | A | 55 | 17.301 | -5.917 | -3.309 |
| ATOM | 875 | HB2  | GLN | A | 55 | 17.001 | -6.565 | -4.135 |
| ATOM | 876 | HB3  | GLN | A | 55 | 17.723 | -5.003 | -3.728 |
| ATOM | 877 | CG   | GLN | A | 55 | 18.372 | -6.651 | -2.487 |
| ATOM | 878 | HG2  | GLN | A | 55 | 18.761 | -5.980 | -1.720 |
| ATOM | 879 | HG3  | GLN | A | 55 | 17.924 | -7.514 | -1.994 |
| ATOM | 880 | CD   | GLN | A | 55 | 19.516 | -7.152 | -3.366 |
| ATOM | 881 | OE1  | GLN | A | 55 | 19.315 | -7.884 | -4.329 |
| ATOM | 882 | NE2  | GLN | A | 55 | 20.745 | -6.794 | -3.066 |
| ATOM | 883 | HE21 | GLN | A | 55 | 21.491 | -7.129 | -3.657 |
| ATOM | 884 | HE22 | GLN | A | 55 | 20.929 | -6.241 | -2.240 |
| ATOM | 885 | C    | GLN | A | 55 | 16.326 | -4.522 | -1.394 |
| ATOM | 886 | O    | GLN | A | 55 | 16.439 | -4.886 | -0.222 |
| ATOM | 887 | N    | THR | A | 56 | 16.358 | -3.230 | -1.757 |
| ATOM | 888 | H    | THR | A | 56 | 16.226 | -2.997 | -2.735 |
| ATOM | 889 | CA   | THR | A | 56 | 16.611 | -2.122 | -0.816 |
| ATOM | 890 | HA   | THR | A | 56 | 17.496 | -2.359 | -0.226 |
| ATOM | 891 | CB   | THR | A | 56 | 16.870 | -0.816 | -1.567 |
| ATOM | 892 | HB   | THR | A | 56 | 15.977 | -0.539 | -2.129 |
| ATOM | 893 | CG2  | THR | A | 56 | 17.263 | 0.338  | -0.642 |
| ATOM | 894 | HG21 | THR | A | 56 | 16.396 | 0.653  | -0.064 |
| ATOM | 895 | HG22 | THR | A | 56 | 18.050 | 0.022  | 0.040  |
| ATOM | 896 | HG23 | THR | A | 56 | 17.605 | 1.189  | -1.232 |
| ATOM | 897 | OG1  | THR | A | 56 | 17.923 | -1.008 | -2.473 |
| ATOM | 898 | HG1  | THR | A | 56 | 18.454 | -1.774 | -2.162 |
| ATOM | 899 | C    | THR | A | 56 | 15.458 | -1.936 | 0.157  |
| ATOM | 900 | O    | THR | A | 56 | 15.693 | -1.687 | 1.337  |
| ATOM | 901 | N    | TYR | A | 57 | 14.216 | -2.099 | -0.307 |
| ATOM | 902 | H    | TYR | A | 57 | 14.088 | -2.311 | -1.285 |
| ATOM | 903 | CA   | TYR | A | 57 | 13.033 | -2.047 | 0.562  |
| ATOM | 904 | HA   | TYR | A | 57 | 13.020 | -1.092 | 1.080  |
| ATOM | 905 | CB   | TYR | A | 57 | 11.743 | -2.170 | -0.278 |
| ATOM | 906 | HB2  | TYR | A | 57 | 11.761 | -3.123 | -0.808 |

|      |     |      |     |   |    |        |        |        |
|------|-----|------|-----|---|----|--------|--------|--------|
| ATOM | 907 | HB3  | TYR | A | 57 | 10.897 | -2.206 | 0.409  |
| ATOM | 908 | CG   | TYR | A | 57 | 11.435 | -1.081 | -1.301 |
| ATOM | 909 | CD1  | TYR | A | 57 | 12.187 | 0.110  | -1.396 |
| ATOM | 910 | HD1  | TYR | A | 57 | 13.016 | 0.294  | -0.731 |
| ATOM | 911 | CE1  | TYR | A | 57 | 11.842 | 1.097  | -2.338 |
| ATOM | 912 | HE1  | TYR | A | 57 | 12.394 | 2.022  | -2.386 |
| ATOM | 913 | CZ   | TYR | A | 57 | 10.772 | 0.888  | -3.229 |
| ATOM | 914 | OH   | TYR | A | 57 | 10.475 | 1.843  | -4.153 |
| ATOM | 915 | HH   | TYR | A | 57 | 11.052 | 2.618  | -4.064 |
| ATOM | 916 | CE2  | TYR | A | 57 | 10.020 | -0.304 | -3.146 |
| ATOM | 917 | HE2  | TYR | A | 57 | 9.193  | -0.470 | -3.821 |
| ATOM | 918 | CD2  | TYR | A | 57 | 10.344 | -1.271 | -2.174 |
| ATOM | 919 | HD2  | TYR | A | 57 | 9.754  | -2.174 | -2.100 |
| ATOM | 920 | C    | TYR | A | 57 | 13.122 | -3.137 | 1.646  |
| ATOM | 921 | O    | TYR | A | 57 | 13.027 | -2.852 | 2.842  |
| ATOM | 922 | N    | CYS | A | 58 | 13.436 | -4.369 | 1.232  |
| ATOM | 923 | H    | CYS | A | 58 | 13.486 | -4.519 | 0.229  |
| ATOM | 924 | CA   | CYS | A | 58 | 13.641 | -5.512 | 2.121  |
| ATOM | 925 | HA   | CYS | A | 58 | 12.749 | -5.628 | 2.736  |
| ATOM | 926 | CB   | CYS | A | 58 | 13.788 | -6.751 | 1.224  |
| ATOM | 927 | HB2  | CYS | A | 58 | 13.030 | -6.720 | 0.436  |
| ATOM | 928 | HB3  | CYS | A | 58 | 14.778 | -6.775 | 0.761  |
| ATOM | 929 | SG   | CYS | A | 58 | 13.523 | -8.243 | 2.216  |
| ATOM | 930 | HG   | CYS | A | 58 | 12.331 | -7.898 | 2.725  |
| ATOM | 931 | C    | CYS | A | 58 | 14.818 | -5.301 | 3.096  |
| ATOM | 932 | O    | CYS | A | 58 | 14.665 | -5.526 | 4.297  |
| ATOM | 933 | N    | GLN | A | 59 | 15.953 | -4.789 | 2.608  |
| ATOM | 934 | H    | GLN | A | 59 | 16.004 | -4.626 | 1.606  |
| ATOM | 935 | CA   | GLN | A | 59 | 17.138 | -4.452 | 3.406  |
| ATOM | 936 | HA   | GLN | A | 59 | 17.504 | -5.352 | 3.897  |
| ATOM | 937 | CB   | GLN | A | 59 | 18.226 | -3.928 | 2.449  |
| ATOM | 938 | HB2  | GLN | A | 59 | 18.379 | -4.653 | 1.649  |
| ATOM | 939 | HB3  | GLN | A | 59 | 17.875 | -3.003 | 1.996  |
| ATOM | 940 | CG   | GLN | A | 59 | 19.585 | -3.666 | 3.119  |
| ATOM | 941 | HG2  | GLN | A | 59 | 19.474 | -2.943 | 3.928  |
| ATOM | 942 | HG3  | GLN | A | 59 | 19.955 | -4.605 | 3.529  |
| ATOM | 943 | CD   | GLN | A | 59 | 20.602 | -3.113 | 2.119  |
| ATOM | 944 | OE1  | GLN | A | 59 | 20.318 | -2.223 | 1.328  |
| ATOM | 945 | NE2  | GLN | A | 59 | 21.821 | -3.603 | 2.098  |
| ATOM | 946 | HE21 | GLN | A | 59 | 22.461 | -3.261 | 1.402  |
| ATOM | 947 | HE22 | GLN | A | 59 | 22.131 | -4.288 | 2.780  |
| ATOM | 948 | C    | GLN | A | 59 | 16.821 | -3.434 | 4.513  |
| ATOM | 949 | O    | GLN | A | 59 | 17.201 | -3.633 | 5.667  |
| ATOM | 950 | N    | ARG | A | 60 | 16.104 | -2.358 | 4.179  |
| ATOM | 951 | H    | ARG | A | 60 | 15.842 | -2.229 | 3.205  |
| ATOM | 952 | CA   | ARG | A | 60 | 15.771 | -1.295 | 5.127  |
| ATOM | 953 | HA   | ARG | A | 60 | 16.684 | -1.022 | 5.656  |
| ATOM | 954 | CB   | ARG | A | 60 | 15.304 | -0.056 | 4.339  |
| ATOM | 955 | HB2  | ARG | A | 60 | 14.583 | -0.355 | 3.576  |
| ATOM | 956 | HB3  | ARG | A | 60 | 14.817 | 0.641  | 5.019  |
| ATOM | 957 | CG   | ARG | A | 60 | 16.520 | 0.640  | 3.699  |
| ATOM | 958 | HG2  | ARG | A | 60 | 17.162 | 1.005  | 4.503  |
| ATOM | 959 | HG3  | ARG | A | 60 | 17.089 | -0.074 | 3.099  |
| ATOM | 960 | CD   | ARG | A | 60 | 16.152 | 1.838  | 2.811  |
| ATOM | 961 | HD2  | ARG | A | 60 | 15.563 | 1.496  | 1.960  |
| ATOM | 962 | HD3  | ARG | A | 60 | 15.557 | 2.538  | 3.396  |
| ATOM | 963 | NE   | ARG | A | 60 | 17.377 | 2.515  | 2.363  |

|      |      |      |     |   |    |        |        |        |
|------|------|------|-----|---|----|--------|--------|--------|
| ATOM | 964  | HE   | ARG | A | 60 | 18.245 | 2.228  | 2.802  |
| ATOM | 965  | CZ   | ARG | A | 60 | 17.501 | 3.513  | 1.500  |
| ATOM | 966  | NH1  | ARG | A | 60 | 16.503 | 4.001  | 0.797  |
| ATOM | 967  | HH11 | ARG | A | 60 | 15.585 | 3.571  | 0.804  |
| ATOM | 968  | HH12 | ARG | A | 60 | 16.701 | 4.775  | 0.168  |
| ATOM | 969  | NH2  | ARG | A | 60 | 18.677 | 4.065  | 1.329  |
| ATOM | 970  | HH21 | ARG | A | 60 | 19.470 | 3.689  | 1.830  |
| ATOM | 971  | HH22 | ARG | A | 60 | 18.769 | 4.831  | 0.674  |
| ATOM | 972  | C    | ARG | A | 60 | 14.767 | -1.750 | 6.200  |
| ATOM | 973  | O    | ARG | A | 60 | 14.955 | -1.420 | 7.374  |
| ATOM | 974  | N    | THR | A | 61 | 13.747 | -2.544 | 5.843  |
| ATOM | 975  | H    | THR | A | 61 | 13.617 | -2.742 | 4.857  |
| ATOM | 976  | CA   | THR | A | 61 | 12.779 | -3.109 | 6.810  |
| ATOM | 977  | HA   | THR | A | 61 | 12.453 | -2.320 | 7.494  |
| ATOM | 978  | CB   | THR | A | 61 | 11.537 | -3.630 | 6.077  |
| ATOM | 979  | HB   | THR | A | 61 | 11.819 | -4.364 | 5.313  |
| ATOM | 980  | CG2  | THR | A | 61 | 10.513 | -4.256 | 7.028  |
| ATOM | 981  | HG21 | THR | A | 61 | 9.576  | -4.431 | 6.505  |
| ATOM | 982  | HG22 | THR | A | 61 | 10.881 | -5.211 | 7.400  |
| ATOM | 983  | HG23 | THR | A | 61 | 10.323 | -3.597 | 7.875  |
| ATOM | 984  | OG1  | THR | A | 61 | 10.924 | -2.515 | 5.472  |
| ATOM | 985  | HG1  | THR | A | 61 | 10.688 | -1.888 | 6.189  |
| ATOM | 986  | C    | THR | A | 61 | 13.422 | -4.165 | 7.706  |
| ATOM | 987  | O    | THR | A | 61 | 13.157 | -4.157 | 8.909  |
| ATOM | 988  | N    | LEU | A | 62 | 14.322 | -5.009 | 7.180  |
| ATOM | 989  | H    | LEU | A | 62 | 14.492 | -4.999 | 6.178  |
| ATOM | 990  | CA   | LEU | A | 62 | 15.109 | -5.938 | 8.000  |
| ATOM | 991  | HA   | LEU | A | 62 | 14.415 | -6.606 | 8.514  |
| ATOM | 992  | CB   | LEU | A | 62 | 16.020 | -6.789 | 7.087  |
| ATOM | 993  | HB2  | LEU | A | 62 | 15.375 | -7.318 | 6.386  |
| ATOM | 994  | HB3  | LEU | A | 62 | 16.646 | -6.128 | 6.488  |
| ATOM | 995  | CG   | LEU | A | 62 | 16.925 | -7.851 | 7.758  |
| ATOM | 996  | HG   | LEU | A | 62 | 17.230 | -8.536 | 6.965  |
| ATOM | 997  | CD1  | LEU | A | 62 | 18.219 | -7.264 | 8.340  |
| ATOM | 998  | HD11 | LEU | A | 62 | 18.887 | -8.082 | 8.609  |
| ATOM | 999  | HD12 | LEU | A | 62 | 18.718 | -6.640 | 7.597  |
| ATOM | 1000 | HD13 | LEU | A | 62 | 18.022 | -6.677 | 9.235  |
| ATOM | 1001 | CD2  | LEU | A | 62 | 16.213 | -8.689 | 8.833  |
| ATOM | 1002 | HD21 | LEU | A | 62 | 15.867 | -8.064 | 9.654  |
| ATOM | 1003 | HD22 | LEU | A | 62 | 15.365 | -9.212 | 8.397  |
| ATOM | 1004 | HD23 | LEU | A | 62 | 16.905 | -9.424 | 9.239  |
| ATOM | 1005 | C    | LEU | A | 62 | 15.866 | -5.175 | 9.091  |
| ATOM | 1006 | O    | LEU | A | 62 | 15.712 | -5.506 | 10.262 |
| ATOM | 1007 | N    | ARG | A | 63 | 16.611 | -4.120 | 8.735  |
| ATOM | 1008 | H    | ARG | A | 63 | 16.700 | -3.911 | 7.747  |
| ATOM | 1009 | CA   | ARG | A | 63 | 17.332 | -3.283 | 9.707  |
| ATOM | 1010 | HA   | ARG | A | 63 | 18.044 | -3.911 | 10.246 |
| ATOM | 1011 | CB   | ARG | A | 63 | 18.112 | -2.185 | 8.979  |
| ATOM | 1012 | HB2  | ARG | A | 63 | 17.423 | -1.639 | 8.332  |
| ATOM | 1013 | HB3  | ARG | A | 63 | 18.507 | -1.483 | 9.717  |
| ATOM | 1014 | CG   | ARG | A | 63 | 19.291 | -2.720 | 8.152  |
| ATOM | 1015 | HG2  | ARG | A | 63 | 20.103 | -3.015 | 8.817  |
| ATOM | 1016 | HG3  | ARG | A | 63 | 18.991 | -3.573 | 7.546  |
| ATOM | 1017 | CD   | ARG | A | 63 | 19.745 | -1.577 | 7.249  |
| ATOM | 1018 | HD2  | ARG | A | 63 | 18.898 | -1.268 | 6.632  |
| ATOM | 1019 | HD3  | ARG | A | 63 | 20.042 | -0.735 | 7.881  |
| ATOM | 1020 | NE   | ARG | A | 63 | 20.859 | -1.942 | 6.365  |

|      |      |      |     |   |    |        |        |        |
|------|------|------|-----|---|----|--------|--------|--------|
| ATOM | 1021 | HE   | ARG | A | 63 | 21.275 | -2.864 | 6.465  |
| ATOM | 1022 | CZ   | ARG | A | 63 | 21.420 | -1.093 | 5.516  |
| ATOM | 1023 | NH1  | ARG | A | 63 | 21.017 | 0.155  | 5.453  |
| ATOM | 1024 | HH11 | ARG | A | 63 | 20.274 | 0.491  | 6.036  |
| ATOM | 1025 | HH12 | ARG | A | 63 | 21.510 | 0.830  | 4.866  |
| ATOM | 1026 | NH2  | ARG | A | 63 | 22.411 | -1.467 | 4.744  |
| ATOM | 1027 | HH21 | ARG | A | 63 | 22.733 | -2.431 | 4.707  |
| ATOM | 1028 | HH22 | ARG | A | 63 | 22.912 | -0.761 | 4.199  |
| ATOM | 1029 | C    | ARG | A | 63 | 16.402 | -2.640 | 10.750 |
| ATOM | 1030 | O    | ARG | A | 63 | 16.737 | -2.688 | 11.936 |
| ATOM | 1031 | N    | GLU | C | 64 | 15.260 | -2.077 | 10.325 |
| ATOM | 1032 | H    | GLU | C | 64 | 15.074 | -2.062 | 9.329  |
| ATOM | 1033 | CA   | GLU | C | 64 | 14.292 | -1.430 | 11.221 |
| ATOM | 1034 | HA   | GLU | C | 64 | 14.795 | -0.584 | 11.690 |
| ATOM | 1035 | CB   | GLU | C | 64 | 13.075 | -0.900 | 10.429 |
| ATOM | 1036 | HB2  | GLU | C | 64 | 13.432 | -0.346 | 9.564  |
| ATOM | 1037 | HB3  | GLU | C | 64 | 12.484 | -1.739 | 10.065 |
| ATOM | 1038 | CG   | GLU | C | 64 | 12.180 | 0.021  | 11.280 |
| ATOM | 1039 | HG2  | GLU | C | 64 | 11.692 | -0.573 | 12.055 |
| ATOM | 1040 | HG3  | GLU | C | 64 | 12.805 | 0.767  | 11.768 |
| ATOM | 1041 | CD   | GLU | C | 64 | 11.099 | 0.745  | 10.467 |
| ATOM | 1042 | OE1  | GLU | C | 64 | 10.203 | 0.095  | 9.898  |
| ATOM | 1043 | OE2  | GLU | C | 64 | 11.104 | 1.997  | 10.391 |
| ATOM | 1044 | C    | GLU | C | 64 | 13.860 | -2.390 | 12.337 |
| ATOM | 1045 | O    | GLU | C | 64 | 13.968 | -2.048 | 13.512 |
| ATOM | 1046 | N    | ILE | A | 65 | 13.440 | -3.611 | 11.984 |
| ATOM | 1047 | H    | ILE | A | 65 | 13.391 | -3.835 | 10.994 |
| ATOM | 1048 | CA   | ILE | A | 65 | 13.050 | -4.635 | 12.968 |
| ATOM | 1049 | HA   | ILE | A | 65 | 12.389 | -4.179 | 13.707 |
| ATOM | 1050 | CB   | ILE | A | 65 | 12.295 | -5.796 | 12.267 |
| ATOM | 1051 | HB   | ILE | A | 65 | 12.914 | -6.167 | 11.447 |
| ATOM | 1052 | CG2  | ILE | A | 65 | 12.046 | -6.962 | 13.247 |
| ATOM | 1053 | HG21 | ILE | A | 65 | 11.490 | -7.762 | 12.761 |
| ATOM | 1054 | HG22 | ILE | A | 65 | 12.990 | -7.392 | 13.584 |
| ATOM | 1055 | HG23 | ILE | A | 65 | 11.488 | -6.609 | 14.116 |
| ATOM | 1056 | CG1  | ILE | A | 65 | 10.957 | -5.280 | 11.684 |
| ATOM | 1057 | HG12 | ILE | A | 65 | 10.313 | -4.962 | 12.504 |
| ATOM | 1058 | HG13 | ILE | A | 65 | 11.148 | -4.412 | 11.056 |
| ATOM | 1059 | CD1  | ILE | A | 65 | 10.194 | -6.296 | 10.824 |
| ATOM | 1060 | HD11 | ILE | A | 65 | 9.352  | -5.799 | 10.343 |
| ATOM | 1061 | HD12 | ILE | A | 65 | 10.851 | -6.701 | 10.054 |
| ATOM | 1062 | HD13 | ILE | A | 65 | 9.805  | -7.106 | 11.440 |
| ATOM | 1063 | C    | ILE | A | 65 | 14.265 | -5.125 | 13.764 |
| ATOM | 1064 | O    | ILE | A | 65 | 14.228 | -5.147 | 14.990 |
| ATOM | 1065 | N    | LYS | A | 66 | 15.347 | -5.526 | 13.094 |
| ATOM | 1066 | H    | LYS | A | 66 | 15.343 | -5.453 | 12.082 |
| ATOM | 1067 | CA   | LYS | A | 66 | 16.486 | -6.205 | 13.724 |
| ATOM | 1068 | HA   | LYS | A | 66 | 16.106 | -7.076 | 14.262 |
| ATOM | 1069 | CB   | LYS | A | 66 | 17.414 | -6.703 | 12.601 |
| ATOM | 1070 | HB2  | LYS | A | 66 | 16.826 | -7.314 | 11.913 |
| ATOM | 1071 | HB3  | LYS | A | 66 | 17.810 | -5.848 | 12.051 |
| ATOM | 1072 | CG   | LYS | A | 66 | 18.572 | -7.554 | 13.129 |
| ATOM | 1073 | HG2  | LYS | A | 66 | 19.215 | -6.933 | 13.752 |
| ATOM | 1074 | HG3  | LYS | A | 66 | 18.169 | -8.362 | 13.740 |
| ATOM | 1075 | CD   | LYS | A | 66 | 19.398 | -8.147 | 11.981 |
| ATOM | 1076 | HD2  | LYS | A | 66 | 18.802 | -8.894 | 11.454 |
| ATOM | 1077 | HD3  | LYS | A | 66 | 19.688 | -7.358 | 11.287 |

|      |      |      |     |   |    |        |         |        |
|------|------|------|-----|---|----|--------|---------|--------|
| ATOM | 1078 | CE   | LYS | A | 66 | 20.651 | -8.787  | 12.574 |
| ATOM | 1079 | HE2  | LYS | A | 66 | 21.263 | -8.009  | 13.038 |
| ATOM | 1080 | HE3  | LYS | A | 66 | 20.350 | -9.483  | 13.359 |
| ATOM | 1081 | NZ   | LYS | A | 66 | 21.443 | -9.524  | 11.571 |
| ATOM | 1082 | HZ1  | LYS | A | 66 | 22.292 | -9.864  | 12.008 |
| ATOM | 1083 | HZ2  | LYS | A | 66 | 20.941 | -10.350 | 11.257 |
| ATOM | 1084 | HZ3  | LYS | A | 66 | 21.681 | -8.940  | 10.772 |
| ATOM | 1085 | C    | LYS | A | 66 | 17.209 | -5.338  | 14.774 |
| ATOM | 1086 | O    | LYS | A | 66 | 17.653 | -5.871  | 15.794 |
| ATOM | 1087 | N    | ILE | A | 67 | 17.288 | -4.015  | 14.568 |
| ATOM | 1088 | H    | ILE | A | 67 | 16.907 | -3.654  | 13.696 |
| ATOM | 1089 | CA   | ILE | A | 67 | 17.779 | -3.063  | 15.586 |
| ATOM | 1090 | HA   | ILE | A | 67 | 18.654 | -3.487  | 16.083 |
| ATOM | 1091 | CB   | ILE | A | 67 | 18.192 | -1.716  | 14.928 |
| ATOM | 1092 | HB   | ILE | A | 67 | 17.363 | -1.360  | 14.312 |
| ATOM | 1093 | CG2  | ILE | A | 67 | 18.492 | -0.638  | 15.991 |
| ATOM | 1094 | HG21 | ILE | A | 67 | 19.314 | -0.958  | 16.633 |
| ATOM | 1095 | HG22 | ILE | A | 67 | 18.755 | 0.304   | 15.515 |
| ATOM | 1096 | HG23 | ILE | A | 67 | 17.613 | -0.444  | 16.604 |
| ATOM | 1097 | CG1  | ILE | A | 67 | 19.426 | -1.930  | 14.019 |
| ATOM | 1098 | HG12 | ILE | A | 67 | 20.260 | -2.283  | 14.627 |
| ATOM | 1099 | HG13 | ILE | A | 67 | 19.193 | -2.703  | 13.290 |
| ATOM | 1100 | CD1  | ILE | A | 67 | 19.885 | -0.693  | 13.235 |
| ATOM | 1101 | HD11 | ILE | A | 67 | 20.658 | -0.987  | 12.526 |
| ATOM | 1102 | HD12 | ILE | A | 67 | 19.044 | -0.265  | 12.687 |
| ATOM | 1103 | HD13 | ILE | A | 67 | 20.305 | 0.053   | 13.908 |
| ATOM | 1104 | C    | ILE | A | 67 | 16.729 | -2.873  | 16.688 |
| ATOM | 1105 | O    | ILE | A | 67 | 17.036 | -3.048  | 17.870 |
| ATOM | 1106 | N    | LEU | A | 68 | 15.493 | -2.517  | 16.324 |
| ATOM | 1107 | H    | LEU | A | 68 | 15.256 | -2.461  | 15.338 |
| ATOM | 1108 | CA   | LEU | A | 68 | 14.477 | -2.089  | 17.287 |
| ATOM | 1109 | HA   | LEU | A | 68 | 14.941 | -1.343  | 17.933 |
| ATOM | 1110 | CB   | LEU | A | 68 | 13.332 | -1.430  | 16.497 |
| ATOM | 1111 | HB2  | LEU | A | 68 | 13.769 | -0.683  | 15.830 |
| ATOM | 1112 | HB3  | LEU | A | 68 | 12.859 | -2.198  | 15.881 |
| ATOM | 1113 | CG   | LEU | A | 68 | 12.239 | -0.741  | 17.334 |
| ATOM | 1114 | HG   | LEU | A | 68 | 11.682 | -1.499  | 17.882 |
| ATOM | 1115 | CD1  | LEU | A | 68 | 12.823 | 0.263   | 18.339 |
| ATOM | 1116 | HD11 | LEU | A | 68 | 13.344 | -0.259  | 19.141 |
| ATOM | 1117 | HD12 | LEU | A | 68 | 13.522 | 0.927   | 17.837 |
| ATOM | 1118 | HD13 | LEU | A | 68 | 12.026 | 0.856   | 18.781 |
| ATOM | 1119 | CD2  | LEU | A | 68 | 11.269 | -0.024  | 16.383 |
| ATOM | 1120 | HD21 | LEU | A | 68 | 10.425 | 0.373   | 16.943 |
| ATOM | 1121 | HD22 | LEU | A | 68 | 11.775 | 0.793   | 15.870 |
| ATOM | 1122 | HD23 | LEU | A | 68 | 10.887 | -0.724  | 15.639 |
| ATOM | 1123 | C    | LEU | A | 68 | 14.003 | -3.224  | 18.207 |
| ATOM | 1124 | O    | LEU | A | 68 | 13.637 | -2.951  | 19.349 |
| ATOM | 1125 | N    | LEU | A | 69 | 14.050 | -4.479  | 17.748 |
| ATOM | 1126 | H    | LEU | A | 69 | 14.285 | -4.611  | 16.767 |
| ATOM | 1127 | CA   | LEU | A | 69 | 13.754 | -5.682  | 18.535 |
| ATOM | 1128 | HA   | LEU | A | 69 | 12.859 | -5.485  | 19.130 |
| ATOM | 1129 | CB   | LEU | A | 69 | 13.471 | -6.831  | 17.539 |
| ATOM | 1130 | HB2  | LEU | A | 69 | 12.725 | -6.486  | 16.818 |
| ATOM | 1131 | HB3  | LEU | A | 69 | 14.393 | -7.046  | 16.992 |
| ATOM | 1132 | CG   | LEU | A | 69 | 12.959 | -8.146  | 18.160 |
| ATOM | 1133 | HG   | LEU | A | 69 | 13.702 | -8.523  | 18.863 |
| ATOM | 1134 | CD1  | LEU | A | 69 | 11.626 | -7.950  | 18.900 |

|      |      |         |     |    |        |         |         |        |
|------|------|---------|-----|----|--------|---------|---------|--------|
| ATOM | 1135 | HD11LEU | A   | 69 | 11.768 | -7.314  | 19.773  |        |
| ATOM | 1136 | HD12LEU | A   | 69 | 10.888 | -7.496  | 18.238  |        |
| ATOM | 1137 | HD13LEU | A   | 69 | 11.249 | -8.911  | 19.242  |        |
| ATOM | 1138 | CD2     | LEU | A  | 69     | 12.782  | -9.205  | 17.061 |
| ATOM | 1139 | HD21LEU | A   | 69 | 12.460 | -10.149 | 17.503  |        |
| ATOM | 1140 | HD22LEU | A   | 69 | 12.038 | -8.878  | 16.334  |        |
| ATOM | 1141 | HD23LEU | A   | 69 | 13.732 | -9.371  | 16.552  |        |
| ATOM | 1142 | C       | LEU | A  | 69     | 14.874  | -6.038  | 19.533 |
| ATOM | 1143 | O       | LEU | A  | 69     | 14.608  | -6.736  | 20.511 |
| ATOM | 1144 | N       | ARG | A  | 70     | 16.109  | -5.551  | 19.329 |
| ATOM | 1145 | H       | ARG | A  | 70     | 16.269  | -4.972  | 18.514 |
| ATOM | 1146 | CA      | ARG | A  | 70     | 17.198  | -5.689  | 20.310 |
| ATOM | 1147 | HA      | ARG | A  | 70     | 17.127  | -6.683  | 20.754 |
| ATOM | 1148 | CB      | ARG | A  | 70     | 18.563  | -5.537  | 19.610 |
| ATOM | 1149 | HB2     | ARG | A  | 70     | 18.567  | -6.145  | 18.709 |
| ATOM | 1150 | HB3     | ARG | A  | 70     | 18.702  | -4.499  | 19.300 |
| ATOM | 1151 | CG      | ARG | A  | 70     | 19.776  | -5.952  | 20.472 |
| ATOM | 1152 | HG2     | ARG | A  | 70     | 20.661  | -5.955  | 19.839 |
| ATOM | 1153 | HG3     | ARG | A  | 70     | 19.937  | -5.201  | 21.246 |
| ATOM | 1154 | CD      | ARG | A  | 70     | 19.667  | -7.329  | 21.148 |
| ATOM | 1155 | HD2     | ARG | A  | 70     | 20.646  | -7.607  | 21.545 |
| ATOM | 1156 | HD3     | ARG | A  | 70     | 18.975  | -7.242  | 21.985 |
| ATOM | 1157 | NE      | ARG | A  | 70     | 19.199  | -8.366  | 20.214 |
| ATOM | 1158 | HE      | ARG | A  | 70     | 19.435  | -8.237  | 19.231 |
| ATOM | 1159 | CZ      | ARG | A  | 70     | 18.460  | -9.429  | 20.499 |
| ATOM | 1160 | NH1     | ARG | A  | 70     | 18.159  | -9.764  | 21.736 |
| ATOM | 1161 | HH11    | ARG | A  | 70     | 18.507  | -9.214  | 22.498 |
| ATOM | 1162 | HH12    | ARG | A  | 70     | 17.610  | -10.589 | 21.930 |
| ATOM | 1163 | NH2     | ARG | A  | 70     | 18.013  | -10.164 | 19.510 |
| ATOM | 1164 | HH21    | ARG | A  | 70     | 18.169  | -9.838  | 18.561 |
| ATOM | 1165 | HH22    | ARG | A  | 70     | 17.387  | -10.941 | 19.660 |
| ATOM | 1166 | C       | ARG | A  | 70     | 17.065  | -4.659  | 21.432 |
| ATOM | 1167 | O       | ARG | A  | 70     | 17.355  | -4.967  | 22.591 |
| ATOM | 1168 | N       | PHE | A  | 71     | 16.650  | -3.435  | 21.097 |
| ATOM | 1169 | H       | PHE | A  | 71     | 16.456  | -3.246  | 20.122 |
| ATOM | 1170 | CA      | PHE | A  | 71     | 16.429  | -2.366  | 22.065 |
| ATOM | 1171 | HA      | PHE | A  | 71     | 17.292  | -2.319  | 22.730 |
| ATOM | 1172 | CB      | PHE | A  | 71     | 16.304  | -1.025  | 21.319 |
| ATOM | 1173 | HB2     | PHE | A  | 71     | 15.489  | -1.114  | 20.597 |
| ATOM | 1174 | HB3     | PHE | A  | 71     | 16.014  | -0.259  | 22.040 |
| ATOM | 1175 | CG      | PHE | A  | 71     | 17.541  | -0.509  | 20.587 |
| ATOM | 1176 | CD1     | PHE | A  | 71     | 18.831  | -1.036  | 20.823 |
| ATOM | 1177 | HD1     | PHE | A  | 71     | 18.982  | -1.856  | 21.506 |
| ATOM | 1178 | CE1     | PHE | A  | 71     | 19.955  | -0.482  | 20.188 |
| ATOM | 1179 | HE1     | PHE | A  | 71     | 20.934  | -0.891  | 20.388 |
| ATOM | 1180 | CZ      | PHE | A  | 71     | 19.807  | 0.596   | 19.301 |
| ATOM | 1181 | HZ      | PHE | A  | 71     | 20.673  | 1.017   | 18.810 |
| ATOM | 1182 | CE2     | PHE | A  | 71     | 18.527  | 1.116   | 19.049 |
| ATOM | 1183 | HE2     | PHE | A  | 71     | 18.411  | 1.937   | 18.358 |
| ATOM | 1184 | CD2     | PHE | A  | 71     | 17.400  | 0.567   | 19.688 |
| ATOM | 1185 | HD2     | PHE | A  | 71     | 16.423  | 0.983   | 19.486 |
| ATOM | 1186 | C       | PHE | A  | 71     | 15.203  | -2.647  | 22.950 |
| ATOM | 1187 | O       | PHE | A  | 71     | 14.209  | -3.216  | 22.503 |
| ATOM | 1188 | N       | ARG | A  | 72     | 15.274  | -2.211  | 24.213 |
| ATOM | 1189 | H       | ARG | A  | 72     | 16.144  | -1.794  | 24.514 |
| ATOM | 1190 | CA      | ARG | A  | 72     | 14.180  | -2.310  | 25.197 |
| ATOM | 1191 | HA      | ARG | A  | 72     | 13.243  | -2.180  | 24.655 |

|      |      |      |     |   |    |        |        |        |
|------|------|------|-----|---|----|--------|--------|--------|
| ATOM | 1192 | CB   | ARG | A | 72 | 14.140 | -3.722 | 25.836 |
| ATOM | 1193 | HB2  | ARG | A | 72 | 13.254 | -3.802 | 26.469 |
| ATOM | 1194 | HB3  | ARG | A | 72 | 14.044 | -4.469 | 25.046 |
| ATOM | 1195 | CG   | ARG | A | 72 | 15.384 | -4.052 | 26.677 |
| ATOM | 1196 | HG2  | ARG | A | 72 | 16.263 | -4.032 | 26.032 |
| ATOM | 1197 | HG3  | ARG | A | 72 | 15.492 | -3.297 | 27.457 |
| ATOM | 1198 | CD   | ARG | A | 72 | 15.298 | -5.428 | 27.351 |
| ATOM | 1199 | HD2  | ARG | A | 72 | 14.434 | -5.440 | 28.017 |
| ATOM | 1200 | HD3  | ARG | A | 72 | 15.163 | -6.196 | 26.588 |
| ATOM | 1201 | NE   | ARG | A | 72 | 16.531 | -5.715 | 28.106 |
| ATOM | 1202 | HE   | ARG | A | 72 | 17.406 | -5.355 | 27.738 |
| ATOM | 1203 | CZ   | ARG | A | 72 | 16.646 | -6.383 | 29.246 |
| ATOM | 1204 | NH1  | ARG | A | 72 | 15.635 | -6.918 | 29.896 |
| ATOM | 1205 | HH11 | ARG | A | 72 | 14.683 | -6.856 | 29.550 |
| ATOM | 1206 | HH12 | ARG | A | 72 | 15.812 | -7.387 | 30.774 |
| ATOM | 1207 | NH2  | ARG | A | 72 | 17.842 | -6.528 | 29.764 |
| ATOM | 1208 | HH21 | ARG | A | 72 | 18.648 | -6.139 | 29.272 |
| ATOM | 1209 | HH22 | ARG | A | 72 | 17.973 | -7.041 | 30.617 |
| ATOM | 1210 | C    | ARG | A | 72 | 14.214 | -1.182 | 26.247 |
| ATOM | 1211 | O    | ARG | A | 72 | 13.525 | -1.256 | 27.261 |
| ATOM | 1212 | N    | HIE | A | 73 | 15.046 | -0.154 | 26.044 |
| ATOM | 1213 | H    | HIE | A | 73 | 15.538 | -0.096 | 25.169 |
| ATOM | 1214 | CA   | HIE | A | 73 | 15.198 | 0.970  | 26.974 |
| ATOM | 1215 | HA   | HIE | A | 73 | 15.253 | 0.564  | 27.986 |
| ATOM | 1216 | CB   | HIE | A | 73 | 16.532 | 1.664  | 26.694 |
| ATOM | 1217 | HB2  | HIE | A | 73 | 17.320 | 0.926  | 26.805 |
| ATOM | 1218 | HB3  | HIE | A | 73 | 16.552 | 2.050  | 25.674 |
| ATOM | 1219 | CG   | HIE | A | 73 | 16.813 | 2.788  | 27.647 |
| ATOM | 1220 | ND1  | HIE | A | 73 | 16.526 | 4.133  | 27.416 |
| ATOM | 1221 | CE1  | HIE | A | 73 | 16.855 | 4.766  | 28.552 |
| ATOM | 1222 | HE1  | HIE | A | 73 | 16.789 | 5.835  | 28.692 |
| ATOM | 1223 | NE2  | HIE | A | 73 | 17.295 | 3.892  | 29.476 |
| ATOM | 1224 | HE2  | HIE | A | 73 | 17.595 | 4.113  | 30.421 |
| ATOM | 1225 | CD2  | HIE | A | 73 | 17.273 | 2.637  | 28.920 |
| ATOM | 1226 | HD2  | HIE | A | 73 | 17.546 | 1.709  | 29.402 |
| ATOM | 1227 | C    | HIE | A | 73 | 14.018 | 1.965  | 26.937 |
| ATOM | 1228 | O    | HIE | A | 73 | 13.417 | 2.195  | 25.888 |
| ATOM | 1229 | N    | GLU | A | 74 | 13.722 | 2.570  | 28.089 |
| ATOM | 1230 | H    | GLU | A | 74 | 14.295 | 2.351  | 28.889 |
| ATOM | 1231 | CA   | GLU | A | 74 | 12.518 | 3.358  | 28.346 |
| ATOM | 1232 | HA   | GLU | A | 74 | 11.663 | 2.682  | 28.308 |
| ATOM | 1233 | CB   | GLU | A | 74 | 12.636 | 3.890  | 29.777 |
| ATOM | 1234 | HB2  | GLU | A | 74 | 12.776 | 3.037  | 30.440 |
| ATOM | 1235 | HB3  | GLU | A | 74 | 13.505 | 4.544  | 29.867 |
| ATOM | 1236 | CG   | GLU | A | 74 | 11.377 | 4.648  | 30.191 |
| ATOM | 1237 | HG2  | GLU | A | 74 | 11.385 | 5.642  | 29.742 |
| ATOM | 1238 | HG3  | GLU | A | 74 | 10.502 | 4.108  | 29.844 |
| ATOM | 1239 | CD   | GLU | A | 74 | 11.271 | 4.758  | 31.697 |
| ATOM | 1240 | OE1  | GLU | A | 74 | 11.411 | 5.880  | 32.223 |
| ATOM | 1241 | OE2  | GLU | A | 74 | 10.998 | 3.728  | 32.347 |
| ATOM | 1242 | C    | GLU | A | 74 | 12.246 | 4.499  | 27.351 |
| ATOM | 1243 | O    | GLU | A | 74 | 11.105 | 4.665  | 26.920 |
| ATOM | 1244 | N    | ASN | A | 75 | 13.269 | 5.268  | 26.964 |
| ATOM | 1245 | H    | ASN | A | 75 | 14.195 | 5.051  | 27.310 |
| ATOM | 1246 | CA   | ASN | A | 75 | 13.118 | 6.459  | 26.110 |
| ATOM | 1247 | HA   | ASN | A | 75 | 12.165 | 6.928  | 26.362 |
| ATOM | 1248 | CB   | ASN | A | 75 | 14.231 | 7.471  | 26.466 |



|      |      |      |     |   |    |        |        |        |
|------|------|------|-----|---|----|--------|--------|--------|
| ATOM | 1249 | HB2  | ASN | A | 75 | 15.203 | 7.040  | 26.226 |
| ATOM | 1250 | HB3  | ASN | A | 75 | 14.098 | 8.371  | 25.864 |
| ATOM | 1251 | CG   | ASN | A | 75 | 14.220 | 7.884  | 27.945 |
| ATOM | 1252 | OD1  | ASN | A | 75 | 15.186 | 7.691  | 28.678 |
| ATOM | 1253 | ND2  | ASN | A | 75 | 13.133 | 8.443  | 28.442 |
| ATOM | 1254 | HD21 | ASN | A | 75 | 13.070 | 8.651  | 29.429 |
| ATOM | 1255 | HD22 | ASN | A | 75 | 12.326 | 8.641  | 27.853 |
| ATOM | 1256 | C    | ASN | A | 75 | 13.029 | 6.117  | 24.594 |
| ATOM | 1257 | O    | ASN | A | 75 | 13.210 | 6.975  | 23.724 |
| ATOM | 1258 | N    | ILE | A | 76 | 12.760 | 4.851  | 24.251 |
| ATOM | 1259 | H    | ILE | A | 76 | 12.536 | 4.205  | 25.005 |
| ATOM | 1260 | CA   | ILE | A | 76 | 12.670 | 4.297  | 22.886 |
| ATOM | 1261 | HA   | ILE | A | 76 | 12.621 | 5.103  | 22.155 |
| ATOM | 1262 | CB   | ILE | A | 76 | 13.921 | 3.427  | 22.575 |
| ATOM | 1263 | HB   | ILE | A | 76 | 13.898 | 2.552  | 23.227 |
| ATOM | 1264 | CG2  | ILE | A | 76 | 13.902 | 2.934  | 21.112 |
| ATOM | 1265 | HG21 | ILE | A | 76 | 13.011 | 2.338  | 20.920 |
| ATOM | 1266 | HG22 | ILE | A | 76 | 13.926 | 3.783  | 20.429 |
| ATOM | 1267 | HG23 | ILE | A | 76 | 14.755 | 2.286  | 20.914 |
| ATOM | 1268 | CG1  | ILE | A | 76 | 15.235 | 4.202  | 22.863 |
| ATOM | 1269 | HG12 | ILE | A | 76 | 15.251 | 5.119  | 22.273 |
| ATOM | 1270 | HG13 | ILE | A | 76 | 15.265 | 4.482  | 23.915 |
| ATOM | 1271 | CD1  | ILE | A | 76 | 16.531 | 3.428  | 22.593 |
| ATOM | 1272 | HD11 | ILE | A | 76 | 17.370 | 4.010  | 22.977 |
| ATOM | 1273 | HD12 | ILE | A | 76 | 16.501 | 2.464  | 23.103 |
| ATOM | 1274 | HD13 | ILE | A | 76 | 16.677 | 3.278  | 21.523 |
| ATOM | 1275 | C    | ILE | A | 76 | 11.362 | 3.493  | 22.778 |
| ATOM | 1276 | O    | ILE | A | 76 | 10.878 | 2.949  | 23.772 |
| ATOM | 1277 | N    | ILE | A | 77 | 10.740 | 3.441  | 21.598 |
| ATOM | 1278 | H    | ILE | A | 77 | 11.153 | 3.925  | 20.803 |
| ATOM | 1279 | CA   | ILE | A | 77 | 9.509  | 2.657  | 21.392 |
| ATOM | 1280 | HA   | ILE | A | 77 | 8.838  | 2.930  | 22.206 |
| ATOM | 1281 | CB   | ILE | A | 77 | 8.833  | 3.066  | 20.062 |
| ATOM | 1282 | HB   | ILE | A | 77 | 8.786  | 4.156  | 20.035 |
| ATOM | 1283 | CG2  | ILE | A | 77 | 9.656  | 2.607  | 18.848 |
| ATOM | 1284 | HG21 | ILE | A | 77 | 10.672 | 2.999  | 18.903 |
| ATOM | 1285 | HG22 | ILE | A | 77 | 9.691  | 1.520  | 18.806 |
| ATOM | 1286 | HG23 | ILE | A | 77 | 9.195  | 2.967  | 17.932 |
| ATOM | 1287 | CG1  | ILE | A | 77 | 7.390  | 2.539  | 19.903 |
| ATOM | 1288 | HG12 | ILE | A | 77 | 6.990  | 2.925  | 18.966 |
| ATOM | 1289 | HG13 | ILE | A | 77 | 7.397  | 1.450  | 19.840 |
| ATOM | 1290 | CD1  | ILE | A | 77 | 6.424  | 2.963  | 21.016 |
| ATOM | 1291 | HD11 | ILE | A | 77 | 6.438  | 4.047  | 21.129 |
| ATOM | 1292 | HD12 | ILE | A | 77 | 5.415  | 2.645  | 20.751 |
| ATOM | 1293 | HD13 | ILE | A | 77 | 6.692  | 2.489  | 21.959 |
| ATOM | 1294 | C    | ILE | A | 77 | 9.737  | 1.134  | 21.517 |
| ATOM | 1295 | O    | ILE | A | 77 | 10.760 | 0.596  | 21.083 |
| ATOM | 1296 | N    | GLY | A | 78 | 8.760  | 0.429  | 22.098 |
| ATOM | 1297 | H    | GLY | A | 78 | 7.927  | 0.909  | 22.404 |
| ATOM | 1298 | CA   | GLY | A | 78 | 8.794  | -1.023 | 22.292 |
| ATOM | 1299 | HA2  | GLY | A | 78 | 9.817  | -1.387 | 22.262 |
| ATOM | 1300 | HA3  | GLY | A | 78 | 8.393  | -1.270 | 23.269 |
| ATOM | 1301 | C    | GLY | A | 78 | 7.947  | -1.776 | 21.268 |
| ATOM | 1302 | O    | GLY | A | 78 | 6.777  | -1.456 | 21.059 |
| ATOM | 1303 | N    | ILE | A | 79 | 8.518  | -2.824 | 20.677 |
| ATOM | 1304 | H    | ILE | A | 79 | 9.519  | -2.941 | 20.817 |
| ATOM | 1305 | CA   | ILE | A | 79 | 7.783  | -3.868 | 19.941 |

|      |      |      |     |   |    |        |         |        |
|------|------|------|-----|---|----|--------|---------|--------|
| ATOM | 1306 | HA   | ILE | A | 79 | 6.901  | -3.426  | 19.475 |
| ATOM | 1307 | CB   | ILE | A | 79 | 8.671  | -4.474  | 18.823 |
| ATOM | 1308 | HB   | ILE | A | 79 | 9.591  | -4.847  | 19.277 |
| ATOM | 1309 | CG2  | ILE | A | 79 | 7.958  | -5.659  | 18.137 |
| ATOM | 1310 | HG21 | ILE | A | 79 | 7.031  | -5.325  | 17.668 |
| ATOM | 1311 | HG22 | ILE | A | 79 | 8.602  | -6.100  | 17.380 |
| ATOM | 1312 | HG23 | ILE | A | 79 | 7.736  | -6.447  | 18.856 |
| ATOM | 1313 | CG1  | ILE | A | 79 | 9.048  | -3.397  | 17.776 |
| ATOM | 1314 | HG12 | ILE | A | 79 | 8.148  | -3.066  | 17.258 |
| ATOM | 1315 | HG13 | ILE | A | 79 | 9.465  | -2.528  | 18.281 |
| ATOM | 1316 | CD1  | ILE | A | 79 | 10.081 | -3.856  | 16.738 |
| ATOM | 1317 | HD11 | ILE | A | 79 | 9.670  | -4.643  | 16.106 |
| ATOM | 1318 | HD12 | ILE | A | 79 | 10.348 | -3.014  | 16.100 |
| ATOM | 1319 | HD13 | ILE | A | 79 | 10.977 | -4.219  | 17.245 |
| ATOM | 1320 | C    | ILE | A | 79 | 7.305  | -4.939  | 20.936 |
| ATOM | 1321 | O    | ILE | A | 79 | 8.102  | -5.429  | 21.738 |
| ATOM | 1322 | N    | ASN | A | 80 | 6.028  | -5.325  | 20.873 |
| ATOM | 1323 | H    | ASN | A | 80 | 5.425  | -4.851  | 20.213 |
| ATOM | 1324 | CA   | ASN | A | 80 | 5.476  | -6.469  | 21.622 |
| ATOM | 1325 | HA   | ASN | A | 80 | 6.137  | -6.712  | 22.455 |
| ATOM | 1326 | CB   | ASN | A | 80 | 4.108  | -6.063  | 22.203 |
| ATOM | 1327 | HB2  | ASN | A | 80 | 4.277  | -5.287  | 22.949 |
| ATOM | 1328 | HB3  | ASN | A | 80 | 3.496  | -5.644  | 21.402 |
| ATOM | 1329 | CG   | ASN | A | 80 | 3.306  | -7.189  | 22.868 |
| ATOM | 1330 | OD1  | ASN | A | 80 | 2.109  | -7.322  | 22.628 |
| ATOM | 1331 | ND2  | ASN | A | 80 | 3.887  | -7.996  | 23.737 |
| ATOM | 1332 | HD21 | ASN | A | 80 | 3.325  | -8.679  | 24.231 |
| ATOM | 1333 | HD22 | ASN | A | 80 | 4.886  | -7.963  | 23.910 |
| ATOM | 1334 | C    | ASN | A | 80 | 5.359  | -7.728  | 20.746 |
| ATOM | 1335 | O    | ASN | A | 80 | 5.720  | -8.819  | 21.185 |
| ATOM | 1336 | N    | ASP | A | 81 | 4.886  | -7.583  | 19.506 |
| ATOM | 1337 | H    | ASP | A | 81 | 4.672  | -6.659  | 19.164 |
| ATOM | 1338 | CA   | ASP | A | 81 | 4.542  | -8.694  | 18.615 |
| ATOM | 1339 | HA   | ASP | A | 81 | 5.183  | -9.548  | 18.848 |
| ATOM | 1340 | CB   | ASP | A | 81 | 3.072  | -9.094  | 18.865 |
| ATOM | 1341 | HB2  | ASP | A | 81 | 2.780  | -8.799  | 19.876 |
| ATOM | 1342 | HB3  | ASP | A | 81 | 2.425  | -8.557  | 18.172 |
| ATOM | 1343 | CG   | ASP | A | 81 | 2.825  | -10.599 | 18.731 |
| ATOM | 1344 | OD1  | ASP | A | 81 | 2.556  | -11.243 | 19.775 |
| ATOM | 1345 | OD2  | ASP | A | 81 | 2.894  | -11.128 | 17.599 |
| ATOM | 1346 | C    | ASP | A | 81 | 4.789  | -8.303  | 17.147 |
| ATOM | 1347 | O    | ASP | A | 81 | 4.828  | -7.117  | 16.800 |
| ATOM | 1348 | N    | ILE | A | 82 | 4.961  | -9.297  | 16.274 |
| ATOM | 1349 | H    | ILE | A | 82 | 4.788  | -10.246 | 16.598 |
| ATOM | 1350 | CA   | ILE | A | 82 | 5.144  | -9.095  | 14.828 |
| ATOM | 1351 | HA   | ILE | A | 82 | 4.655  | -8.163  | 14.554 |
| ATOM | 1352 | CB   | ILE | A | 82 | 6.637  | -9.002  | 14.404 |
| ATOM | 1353 | HB   | ILE | A | 82 | 7.071  | -10.003 | 14.444 |
| ATOM | 1354 | CG2  | ILE | A | 82 | 6.695  | -8.500  | 12.945 |
| ATOM | 1355 | HG21 | ILE | A | 82 | 7.716  | -8.505  | 12.570 |
| ATOM | 1356 | HG22 | ILE | A | 82 | 6.102  | -9.143  | 12.294 |
| ATOM | 1357 | HG23 | ILE | A | 82 | 6.317  | -7.482  | 12.879 |
| ATOM | 1358 | CG1  | ILE | A | 82 | 7.491  | -8.091  | 15.322 |
| ATOM | 1359 | HG12 | ILE | A | 82 | 7.067  | -7.087  | 15.336 |
| ATOM | 1360 | HG13 | ILE | A | 82 | 7.466  | -8.489  | 16.336 |
| ATOM | 1361 | CD1  | ILE | A | 82 | 8.968  | -7.991  | 14.921 |
| ATOM | 1362 | HD11 | ILE | A | 82 | 9.529  | -7.498  | 15.715 |

|      |      |         |     |    |        |         |         |        |
|------|------|---------|-----|----|--------|---------|---------|--------|
| ATOM | 1363 | HD12ILE | A   | 82 | 9.384  | -8.987  | 14.765  |        |
| ATOM | 1364 | HD13ILE | A   | 82 | 9.074  | -7.401  | 14.011  |        |
| ATOM | 1365 | C       | ILE | A  | 82     | 4.432   | -10.233 | 14.095 |
| ATOM | 1366 | O       | ILE | A  | 82     | 4.819   | -11.395 | 14.228 |
| ATOM | 1367 | N       | ILE | A  | 83     | 3.394   | -9.914  | 13.324 |
| ATOM | 1368 | H       | ILE | A  | 83     | 3.219   | -8.929  | 13.149 |
| ATOM | 1369 | CA      | ILE | A  | 83     | 2.568   | -10.904 | 12.618 |
| ATOM | 1370 | HA      | ILE | A  | 83     | 2.736   | -11.874 | 13.092 |
| ATOM | 1371 | CB      | ILE | A  | 83     | 1.045   | -10.595 | 12.714 |
| ATOM | 1372 | HB      | ILE | A  | 83     | 0.772   | -9.876  | 11.940 |
| ATOM | 1373 | CG2     | ILE | A  | 83     | 0.261   | -11.893 | 12.433 |
| ATOM | 1374 | HG21ILE | A   | 83 | 0.468  | -12.259 | 11.428  |        |
| ATOM | 1375 | HG22ILE | A   | 83 | 0.524  | -12.659 | 13.164  |        |
| ATOM | 1376 | HG23ILE | A   | 83 | -0.811 | -11.703 | 12.493  |        |
| ATOM | 1377 | CG1     | ILE | A  | 83     | 0.564   | -10.035 | 14.075 |
| ATOM | 1378 | HG12ILE | A   | 83 | -0.473 | -10.321 | 14.245  |        |
| ATOM | 1379 | HG13ILE | A   | 83 | 1.149  | -10.467 | 14.887  |        |
| ATOM | 1380 | CD1     | ILE | A  | 83     | 0.607   | -8.506  | 14.161 |
| ATOM | 1381 | HD11ILE | A   | 83 | 0.046  | -8.071  | 13.335  |        |
| ATOM | 1382 | HD12ILE | A   | 83 | 0.146  | -8.194  | 15.098  |        |
| ATOM | 1383 | HD13ILE | A   | 83 | 1.633  | -8.146  | 14.129  |        |
| ATOM | 1384 | C       | ILE | A  | 83     | 3.015   | -11.008 | 11.153 |
| ATOM | 1385 | O       | ILE | A  | 83     | 3.347   | -10.004 | 10.523 |
| ATOM | 1386 | N       | ARG | A  | 84     | 2.973   | -12.224 | 10.603 |
| ATOM | 1387 | H       | ARG | A  | 84     | 2.697   | -12.992 | 11.194 |
| ATOM | 1388 | CA      | ARG | A  | 84     | 3.154   | -12.529 | 9.180  |
| ATOM | 1389 | HA      | ARG | A  | 84     | 2.583   | -11.786 | 8.623  |
| ATOM | 1390 | CB      | ARG | A  | 84     | 4.629   | -12.362 | 8.741  |
| ATOM | 1391 | HB2     | ARG | A  | 84     | 4.710   | -12.595 | 7.678  |
| ATOM | 1392 | HB3     | ARG | A  | 84     | 4.887   | -11.307 | 8.841  |
| ATOM | 1393 | CG      | ARG | A  | 84     | 5.701   | -13.164 | 9.505  |
| ATOM | 1394 | HG2     | ARG | A  | 84     | 6.667   | -12.786 | 9.175  |
| ATOM | 1395 | HG3     | ARG | A  | 84     | 5.610   | -12.978 | 10.574 |
| ATOM | 1396 | CD      | ARG | A  | 84     | 5.663   | -14.674 | 9.244  |
| ATOM | 1397 | HD2     | ARG | A  | 84     | 4.764   | -15.082 | 9.704  |
| ATOM | 1398 | HD3     | ARG | A  | 84     | 5.623   | -14.837 | 8.166  |
| ATOM | 1399 | NE      | ARG | A  | 84     | 6.840   | -15.383 | 9.779  |
| ATOM | 1400 | HE      | ARG | A  | 84     | 7.618   | -14.804 | 10.084 |
| ATOM | 1401 | CZ      | ARG | A  | 84     | 6.972   | -16.706 | 9.853  |
| ATOM | 1402 | NH1     | ARG | A  | 84     | 6.011   | -17.541 | 9.523  |
| ATOM | 1403 | HH11ARG | A   | 84 | 5.142  | -17.193 | 9.133   |        |
| ATOM | 1404 | HH12ARG | A   | 84 | 6.169  | -18.540 | 9.598   |        |
| ATOM | 1405 | NH2     | ARG | A  | 84     | 8.096   | -17.251 | 10.253 |
| ATOM | 1406 | HH21ARG | A   | 84 | 8.915  | -16.673 | 10.418  |        |
| ATOM | 1407 | HH22ARG | A   | 84 | 8.187  | -18.256 | 10.226  |        |
| ATOM | 1408 | C       | ARG | A  | 84     | 2.540   | -13.891 | 8.833  |
| ATOM | 1409 | O       | ARG | A  | 84     | 2.148   | -14.646 | 9.726  |
| ATOM | 1410 | N       | ALA | A  | 85     | 2.460   | -14.211 | 7.542  |
| ATOM | 1411 | H       | ALA | A  | 85     | 2.759   | -13.518 | 6.873  |
| ATOM | 1412 | CA      | ALA | A  | 85     | 1.912   | -15.467 | 7.016  |
| ATOM | 1413 | HA      | ALA | A  | 85     | 0.894   | -15.571 | 7.396  |
| ATOM | 1414 | CB      | ALA | A  | 85     | 1.849   | -15.288 | 5.499  |
| ATOM | 1415 | HB1     | ALA | A  | 85     | 2.858   | -15.286 | 5.086  |
| ATOM | 1416 | HB2     | ALA | A  | 85     | 1.272   | -16.080 | 5.035  |
| ATOM | 1417 | HB3     | ALA | A  | 85     | 1.355   | -14.345 | 5.257  |
| ATOM | 1418 | C       | ALA | A  | 85     | 2.713   | -16.728 | 7.453  |
| ATOM | 1419 | O       | ALA | A  | 85     | 3.868   | -16.597 | 7.864  |

|      |      |      |     |   |    |        |         |        |
|------|------|------|-----|---|----|--------|---------|--------|
| ATOM | 1420 | N    | PRO | A | 86 | 2.140  | -17.950 | 7.384  |
| ATOM | 1421 | CD   | PRO | A | 86 | 0.840  | -18.275 | 6.808  |
| ATOM | 1422 | HD2  | PRO | A | 86 | 0.769  | -17.967 | 5.767  |
| ATOM | 1423 | HD3  | PRO | A | 86 | 0.048  | -17.810 | 7.396  |
| ATOM | 1424 | CG   | PRO | A | 86 | 0.722  | -19.794 | 6.879  |
| ATOM | 1425 | HG2  | PRO | A | 86 | 1.186  | -20.240 | 5.997  |
| ATOM | 1426 | HG3  | PRO | A | 86 | -0.315 | -20.119 | 6.972  |
| ATOM | 1427 | CB   | PRO | A | 86 | 1.545  | -20.135 | 8.117  |
| ATOM | 1428 | HB2  | PRO | A | 86 | 1.896  | -21.166 | 8.089  |
| ATOM | 1429 | HB3  | PRO | A | 86 | 0.951  | -19.961 | 9.016  |
| ATOM | 1430 | CA   | PRO | A | 86 | 2.692  | -19.122 | 8.073  |
| ATOM | 1431 | HA   | PRO | A | 86 | 2.954  | -18.851 | 9.094  |
| ATOM | 1432 | C    | PRO | A | 86 | 3.941  | -19.732 | 7.421  |
| ATOM | 1433 | O    | PRO | A | 86 | 4.713  | -20.396 | 8.115  |
| ATOM | 1434 | N    | THR | A | 87 | 4.149  | -19.515 | 6.116  |
| ATOM | 1435 | H    | THR | A | 87 | 3.486  | -18.952 | 5.604  |
| ATOM | 1436 | CA   | THR | A | 87 | 5.256  | -20.063 | 5.320  |
| ATOM | 1437 | HA   | THR | A | 87 | 6.042  | -20.415 | 5.984  |
| ATOM | 1438 | CB   | THR | A | 87 | 4.782  | -21.252 | 4.475  |
| ATOM | 1439 | HB   | THR | A | 87 | 5.598  | -21.568 | 3.831  |
| ATOM | 1440 | CG2  | THR | A | 87 | 4.370  | -22.447 | 5.335  |
| ATOM | 1441 | HG21 | THR | A | 87 | 5.187  | -22.719 | 6.004  |
| ATOM | 1442 | HG22 | THR | A | 87 | 3.488  | -22.208 | 5.928  |
| ATOM | 1443 | HG23 | THR | A | 87 | 4.149  | -23.301 | 4.695  |
| ATOM | 1444 | OG1  | THR | A | 87 | 3.686  | -20.874 | 3.674  |
| ATOM | 1445 | HG1  | THR | A | 87 | 3.445  | -21.647 | 3.152  |
| ATOM | 1446 | C    | THR | A | 87 | 5.846  | -18.970 | 4.438  |
| ATOM | 1447 | O    | THR | A | 87 | 5.182  | -17.971 | 4.158  |
| ATOM | 1448 | N    | ILE | A | 88 | 7.106  | -19.112 | 4.014  |
| ATOM | 1449 | H    | ILE | A | 88 | 7.593  | -19.980 | 4.196  |
| ATOM | 1450 | CA   | ILE | A | 88 | 7.821  | -18.015 | 3.331  |
| ATOM | 1451 | HA   | ILE | A | 88 | 7.647  | -17.110 | 3.915  |
| ATOM | 1452 | CB   | ILE | A | 88 | 9.347  | -18.270 | 3.321  |
| ATOM | 1453 | HB   | ILE | A | 88 | 9.647  | -18.503 | 4.344  |
| ATOM | 1454 | CG2  | ILE | A | 88 | 9.747  | -19.462 | 2.433  |
| ATOM | 1455 | HG21 | ILE | A | 88 | 10.813 | -19.667 | 2.528  |
| ATOM | 1456 | HG22 | ILE | A | 88 | 9.216  | -20.356 | 2.751  |
| ATOM | 1457 | HG23 | ILE | A | 88 | 9.518  | -19.256 | 1.387  |
| ATOM | 1458 | CG1  | ILE | A | 88 | 10.087 | -16.982 | 2.901  |
| ATOM | 1459 | HG12 | ILE | A | 88 | 9.914  | -16.791 | 1.842  |
| ATOM | 1460 | HG13 | ILE | A | 88 | 9.692  | -16.145 | 3.476  |
| ATOM | 1461 | CD1  | ILE | A | 88 | 11.596 | -17.038 | 3.139  |
| ATOM | 1462 | HD11 | ILE | A | 88 | 11.797 | -17.289 | 4.181  |
| ATOM | 1463 | HD12 | ILE | A | 88 | 12.053 | -17.781 | 2.487  |
| ATOM | 1464 | HD13 | ILE | A | 88 | 12.039 | -16.070 | 2.914  |
| ATOM | 1465 | C    | ILE | A | 88 | 7.232  | -17.713 | 1.946  |
| ATOM | 1466 | O    | ILE | A | 88 | 7.195  | -16.552 | 1.537  |
| ATOM | 1467 | N    | GLU | A | 89 | 6.681  | -18.733 | 1.288  |
| ATOM | 1468 | H    | GLU | A | 89 | 6.787  | -19.655 | 1.696  |
| ATOM | 1469 | CA   | GLU | A | 89 | 5.879  | -18.622 | 0.068  |
| ATOM | 1470 | HA   | GLU | A | 89 | 6.487  | -18.175 | -0.721 |
| ATOM | 1471 | CB   | GLU | A | 89 | 5.514  | -20.052 | -0.362 |
| ATOM | 1472 | HB2  | GLU | A | 89 | 6.440  | -20.550 | -0.656 |
| ATOM | 1473 | HB3  | GLU | A | 89 | 5.095  | -20.592 | 0.489  |
| ATOM | 1474 | CG   | GLU | A | 89 | 4.517  | -20.136 | -1.521 |
| ATOM | 1475 | HG2  | GLU | A | 89 | 3.497  | -20.097 | -1.136 |
| ATOM | 1476 | HG3  | GLU | A | 89 | 4.665  | -19.289 | -2.193 |

|      |      |      |     |   |    |        |         |        |
|------|------|------|-----|---|----|--------|---------|--------|
| ATOM | 1477 | CD   | GLU | A | 89 | 4.732  | -21.424 | -2.306 |
| ATOM | 1478 | OE1  | GLU | A | 89 | 5.250  | -21.314 | -3.442 |
| ATOM | 1479 | OE2  | GLU | A | 89 | 4.482  | -22.533 | -1.778 |
| ATOM | 1480 | C    | GLU | A | 89 | 4.625  | -17.747 | 0.250  |
| ATOM | 1481 | O    | GLU | A | 89 | 4.230  | -17.053 | -0.681 |
| ATOM | 1482 | N    | GLN | A | 90 | 4.012  | -17.735 | 1.437  |
| ATOM | 1483 | H    | GLN | A | 90 | 4.416  | -18.260 | 2.202  |
| ATOM | 1484 | CA   | GLN | A | 90 | 2.800  | -16.951 | 1.709  |
| ATOM | 1485 | HA   | GLN | A | 90 | 2.248  | -16.805 | 0.777  |
| ATOM | 1486 | CB   | GLN | A | 90 | 1.909  | -17.732 | 2.697  |
| ATOM | 1487 | HB2  | GLN | A | 90 | 2.491  | -17.964 | 3.590  |
| ATOM | 1488 | HB3  | GLN | A | 90 | 1.072  | -17.101 | 2.997  |
| ATOM | 1489 | CG   | GLN | A | 90 | 1.331  | -19.039 | 2.124  |
| ATOM | 1490 | HG2  | GLN | A | 90 | 2.106  | -19.605 | 1.609  |
| ATOM | 1491 | HG3  | GLN | A | 90 | 0.975  | -19.647 | 2.956  |
| ATOM | 1492 | CD   | GLN | A | 90 | 0.166  | -18.797 | 1.165  |
| ATOM | 1493 | OE1  | GLN | A | 90 | 0.329  | -18.328 | 0.049  |
| ATOM | 1494 | NE2  | GLN | A | 90 | -1.059 | -19.076 | 1.558  |
| ATOM | 1495 | HE21 | GLN | A | 90 | -1.818 | -18.886 | 0.923  |
| ATOM | 1496 | HE22 | GLN | A | 90 | -1.240 | -19.499 | 2.451  |
| ATOM | 1497 | C    | GLN | A | 90 | 3.109  | -15.541 | 2.250  |
| ATOM | 1498 | O    | GLN | A | 90 | 2.186  | -14.750 | 2.437  |
| ATOM | 1499 | N    | MET | A | 91 | 4.377  | -15.214 | 2.542  |
| ATOM | 1500 | H    | MET | A | 91 | 5.099  | -15.891 | 2.331  |
| ATOM | 1501 | CA   | MET | A | 91 | 4.775  | -13.940 | 3.158  |
| ATOM | 1502 | HA   | MET | A | 91 | 3.961  | -13.609 | 3.802  |
| ATOM | 1503 | CB   | MET | A | 91 | 5.991  | -14.158 | 4.073  |
| ATOM | 1504 | HB2  | MET | A | 91 | 5.791  | -14.999 | 4.739  |
| ATOM | 1505 | HB3  | MET | A | 91 | 6.872  | -14.395 | 3.475  |
| ATOM | 1506 | CG   | MET | A | 91 | 6.255  | -12.916 | 4.933  |
| ATOM | 1507 | HG2  | MET | A | 91 | 6.521  | -12.081 | 4.286  |
| ATOM | 1508 | HG3  | MET | A | 91 | 5.330  | -12.638 | 5.446  |
| ATOM | 1509 | SD   | MET | A | 91 | 7.559  | -13.104 | 6.177  |
| ATOM | 1510 | CE   | MET | A | 91 | 8.997  | -13.209 | 5.094  |
| ATOM | 1511 | HE1  | MET | A | 91 | 9.016  | -14.178 | 4.600  |
| ATOM | 1512 | HE2  | MET | A | 91 | 8.938  | -12.420 | 4.350  |
| ATOM | 1513 | HE3  | MET | A | 91 | 9.902  | -13.078 | 5.687  |
| ATOM | 1514 | C    | MET | A | 91 | 4.982  | -12.834 | 2.109  |
| ATOM | 1515 | O    | MET | A | 91 | 6.050  | -12.702 | 1.508  |
| ATOM | 1516 | N    | LYS | A | 92 | 3.941  | -12.024 | 1.916  |
| ATOM | 1517 | H    | LYS | A | 92 | 3.096  | -12.244 | 2.432  |
| ATOM | 1518 | CA   | LYS | A | 92 | 3.882  | -10.845 | 1.039  |
| ATOM | 1519 | HA   | LYS | A | 92 | 4.776  | -10.803 | 0.418  |
| ATOM | 1520 | CB   | LYS | A | 92 | 2.645  | -11.027 | 0.137  |
| ATOM | 1521 | HB2  | LYS | A | 92 | 2.712  | -11.998 | -0.356 |
| ATOM | 1522 | HB3  | LYS | A | 92 | 1.755  | -11.050 | 0.768  |
| ATOM | 1523 | CG   | LYS | A | 92 | 2.424  | -9.957  | -0.946 |
| ATOM | 1524 | HG2  | LYS | A | 92 | 1.476  | -10.186 | -1.436 |
| ATOM | 1525 | HG3  | LYS | A | 92 | 2.328  | -8.975  | -0.481 |
| ATOM | 1526 | CD   | LYS | A | 92 | 3.524  | -9.913  | -2.020 |
| ATOM | 1527 | HD2  | LYS | A | 92 | 4.441  | -9.494  | -1.600 |
| ATOM | 1528 | HD3  | LYS | A | 92 | 3.716  | -10.923 | -2.389 |
| ATOM | 1529 | CE   | LYS | A | 92 | 3.035  | -9.035  | -3.180 |
| ATOM | 1530 | HE2  | LYS | A | 92 | 2.104  | -9.452  | -3.569 |
| ATOM | 1531 | HE3  | LYS | A | 92 | 2.823  | -8.030  | -2.803 |
| ATOM | 1532 | NZ   | LYS | A | 92 | 4.019  | -8.939  | -4.281 |
| ATOM | 1533 | HZ1  | LYS | A | 92 | 3.655  | -8.358  | -5.026 |

|      |      |      |     |   |    |        |         |        |
|------|------|------|-----|---|----|--------|---------|--------|
| ATOM | 1534 | HZ2  | LYS | A | 92 | 4.860  | -8.458  | -3.956 |
| ATOM | 1535 | HZ3  | LYS | A | 92 | 4.300  | -9.847  | -4.637 |
| ATOM | 1536 | C    | LYS | A | 92 | 3.817  | -9.532  | 1.849  |
| ATOM | 1537 | O    | LYS | A | 92 | 4.365  | -8.519  | 1.413  |
| ATOM | 1538 | N    | ASP | A | 93 | 3.223  | -9.565  | 3.045  |
| ATOM | 1539 | H    | ASP | A | 93 | 2.786  | -10.435 | 3.328  |
| ATOM | 1540 | CA   | ASP | A | 93 | 3.259  | -8.492  | 4.046  |
| ATOM | 1541 | HA   | ASP | A | 93 | 3.783  | -7.623  | 3.645  |
| ATOM | 1542 | CB   | ASP | A | 93 | 1.821  | -8.069  | 4.411  |
| ATOM | 1543 | HB2  | ASP | A | 93 | 1.202  | -8.959  | 4.540  |
| ATOM | 1544 | HB3  | ASP | A | 93 | 1.838  | -7.541  | 5.365  |
| ATOM | 1545 | CG   | ASP | A | 93 | 1.171  | -7.123  | 3.401  |
| ATOM | 1546 | OD1  | ASP | A | 93 | 1.805  | -6.103  | 3.042  |
| ATOM | 1547 | OD2  | ASP | A | 93 | -0.017 | -7.317  | 3.065  |
| ATOM | 1548 | C    | ASP | A | 93 | 3.994  | -8.933  | 5.329  |
| ATOM | 1549 | O    | ASP | A | 93 | 4.151  | -10.125 | 5.604  |
| ATOM | 1550 | N    | VAL | A | 94 | 4.396  | -7.944  | 6.131  |
| ATOM | 1551 | H    | VAL | A | 94 | 4.313  | -6.996  | 5.756  |
| ATOM | 1552 | CA   | VAL | A | 94 | 4.792  | -8.084  | 7.545  |
| ATOM | 1553 | HA   | VAL | A | 94 | 4.377  | -9.024  | 7.912  |
| ATOM | 1554 | CB   | VAL | A | 94 | 6.332  | -8.162  | 7.703  |
| ATOM | 1555 | HB   | VAL | A | 94 | 6.687  | -8.995  | 7.094  |
| ATOM | 1556 | CG1  | VAL | A | 94 | 7.071  | -6.901  | 7.218  |
| ATOM | 1557 | HG11 | VAL | A | 94 | 8.149  | -7.056  | 7.283  |
| ATOM | 1558 | HG12 | VAL | A | 94 | 6.817  | -6.694  | 6.179  |
| ATOM | 1559 | HG13 | VAL | A | 94 | 6.803  | -6.042  | 7.833  |
| ATOM | 1560 | CG2  | VAL | A | 94 | 6.750  | -8.460  | 9.154  |
| ATOM | 1561 | HG21 | VAL | A | 94 | 6.230  | -9.347  | 9.516  |
| ATOM | 1562 | HG22 | VAL | A | 94 | 7.825  | -8.644  | 9.198  |
| ATOM | 1563 | HG23 | VAL | A | 94 | 6.514  | -7.616  | 9.802  |
| ATOM | 1564 | C    | VAL | A | 94 | 4.166  | -6.946  | 8.372  |
| ATOM | 1565 | O    | VAL | A | 94 | 4.054  | -5.818  | 7.891  |
| ATOM | 1566 | N    | TYR | A | 95 | 3.724  | -7.252  | 9.597  |
| ATOM | 1567 | H    | TYR | A | 95 | 3.798  | -8.223  | 9.896  |
| ATOM | 1568 | CA   | TYR | A | 95 | 2.972  | -6.352  | 10.483 |
| ATOM | 1569 | HA   | TYR | A | 95 | 2.879  | -5.369  | 10.030 |
| ATOM | 1570 | CB   | TYR | A | 95 | 1.555  | -6.918  | 10.683 |
| ATOM | 1571 | HB2  | TYR | A | 95 | 1.634  | -7.920  | 11.103 |
| ATOM | 1572 | HB3  | TYR | A | 95 | 1.040  | -6.304  | 11.420 |
| ATOM | 1573 | CG   | TYR | A | 95 | 0.687  | -6.999  | 9.440  |
| ATOM | 1574 | CD1  | TYR | A | 95 | 0.820  | -8.082  | 8.547  |
| ATOM | 1575 | HD1  | TYR | A | 95 | 1.572  | -8.839  | 8.728  |
| ATOM | 1576 | CE1  | TYR | A | 95 | -0.039 | -8.199  | 7.437  |
| ATOM | 1577 | HE1  | TYR | A | 95 | 0.060  | -9.041  | 6.767  |
| ATOM | 1578 | CZ   | TYR | A | 95 | -1.048 | -7.232  | 7.226  |
| ATOM | 1579 | OH   | TYR | A | 95 | -1.893 | -7.333  | 6.165  |
| ATOM | 1580 | HH   | TYR | A | 95 | -1.675 | -8.076  | 5.593  |
| ATOM | 1581 | CE2  | TYR | A | 95 | -1.183 | -6.149  | 8.121  |
| ATOM | 1582 | HE2  | TYR | A | 95 | -1.962 | -5.419  | 7.965  |
| ATOM | 1583 | CD2  | TYR | A | 95 | -0.309 | -6.028  | 9.218  |
| ATOM | 1584 | HD2  | TYR | A | 95 | -0.430 | -5.210  | 9.911  |
| ATOM | 1585 | C    | TYR | A | 95 | 3.670  | -6.198  | 11.848 |
| ATOM | 1586 | O    | TYR | A | 95 | 3.685  | -7.132  | 12.651 |
| ATOM | 1587 | N    | ILE | A | 96 | 4.242  | -5.026  | 12.145 |
| ATOM | 1588 | H    | ILE | A | 96 | 4.138  | -4.267  | 11.476 |
| ATOM | 1589 | CA   | ILE | A | 96 | 4.941  | -4.751  | 13.424 |
| ATOM | 1590 | HA   | ILE | A | 96 | 5.329  | -5.682  | 13.836 |

|      |      |      |     |   |    |       |        |        |
|------|------|------|-----|---|----|-------|--------|--------|
| ATOM | 1591 | CB   | ILE | A | 96 | 6.135 | -3.774 | 13.228 |
| ATOM | 1592 | HB   | ILE | A | 96 | 5.736 | -2.770 | 13.071 |
| ATOM | 1593 | CG2  | ILE | A | 96 | 6.978 | -3.759 | 14.522 |
| ATOM | 1594 | HG21 | ILE | A | 96 | 7.453 | -4.729 | 14.673 |
| ATOM | 1595 | HG22 | ILE | A | 96 | 7.746 | -2.989 | 14.469 |
| ATOM | 1596 | HG23 | ILE | A | 96 | 6.355 | -3.528 | 15.386 |
| ATOM | 1597 | CG1  | ILE | A | 96 | 7.022 | -4.115 | 12.005 |
| ATOM | 1598 | HG12 | ILE | A | 96 | 7.488 | -5.089 | 12.152 |
| ATOM | 1599 | HG13 | ILE | A | 96 | 6.405 | -4.170 | 11.109 |
| ATOM | 1600 | CD1  | ILE | A | 96 | 8.108 | -3.067 | 11.725 |
| ATOM | 1601 | HD11 | ILE | A | 96 | 8.614 | -3.310 | 10.790 |
| ATOM | 1602 | HD12 | ILE | A | 96 | 7.655 | -2.079 | 11.635 |
| ATOM | 1603 | HD13 | ILE | A | 96 | 8.848 | -3.053 | 12.525 |
| ATOM | 1604 | C    | ILE | A | 96 | 3.952 | -4.154 | 14.434 |
| ATOM | 1605 | O    | ILE | A | 96 | 3.340 | -3.142 | 14.107 |
| ATOM | 1606 | N    | VAL | A | 97 | 3.817 | -4.718 | 15.642 |
| ATOM | 1607 | H    | VAL | A | 97 | 4.325 | -5.573 | 15.863 |
| ATOM | 1608 | CA   | VAL | A | 97 | 2.972 | -4.155 | 16.714 |
| ATOM | 1609 | HA   | VAL | A | 97 | 2.247 | -3.481 | 16.255 |
| ATOM | 1610 | CB   | VAL | A | 97 | 2.167 | -5.223 | 17.494 |
| ATOM | 1611 | HB   | VAL | A | 97 | 2.845 | -5.796 | 18.130 |
| ATOM | 1612 | CG1  | VAL | A | 97 | 1.126 | -4.538 | 18.396 |
| ATOM | 1613 | HG11 | VAL | A | 97 | 0.496 | -3.870 | 17.810 |
| ATOM | 1614 | HG12 | VAL | A | 97 | 0.491 | -5.284 | 18.869 |
| ATOM | 1615 | HG13 | VAL | A | 97 | 1.621 | -3.964 | 19.179 |
| ATOM | 1616 | CG2  | VAL | A | 97 | 1.458 | -6.205 | 16.552 |
| ATOM | 1617 | HG21 | VAL | A | 97 | 0.839 | -5.670 | 15.834 |
| ATOM | 1618 | HG22 | VAL | A | 97 | 2.194 | -6.802 | 16.016 |
| ATOM | 1619 | HG23 | VAL | A | 97 | 0.830 | -6.882 | 17.130 |
| ATOM | 1620 | C    | VAL | A | 97 | 3.819 | -3.358 | 17.708 |
| ATOM | 1621 | O    | VAL | A | 97 | 4.748 | -3.888 | 18.324 |
| ATOM | 1622 | N    | GLN | A | 98 | 3.452 | -2.093 | 17.899 |
| ATOM | 1623 | H    | GLN | A | 98 | 2.645 | -1.750 | 17.375 |
| ATOM | 1624 | CA   | GLN | A | 98 | 4.021 | -1.169 | 18.882 |
| ATOM | 1625 | HA   | GLN | A | 98 | 4.679 | -1.699 | 19.573 |
| ATOM | 1626 | CB   | GLN | A | 98 | 4.837 | -0.094 | 18.134 |
| ATOM | 1627 | HB2  | GLN | A | 98 | 4.236 | 0.299  | 17.310 |
| ATOM | 1628 | HB3  | GLN | A | 98 | 5.060 | 0.728  | 18.816 |
| ATOM | 1629 | CG   | GLN | A | 98 | 6.168 | -0.656 | 17.586 |
| ATOM | 1630 | HG2  | GLN | A | 98 | 6.886 | -0.725 | 18.403 |
| ATOM | 1631 | HG3  | GLN | A | 98 | 6.011 | -1.658 | 17.193 |
| ATOM | 1632 | CD   | GLN | A | 98 | 6.790 | 0.175  | 16.461 |
| ATOM | 1633 | OE1  | GLN | A | 98 | 7.194 | -0.342 | 15.434 |
| ATOM | 1634 | NE2  | GLN | A | 98 | 6.906 | 1.480  | 16.592 |
| ATOM | 1635 | HE21 | GLN | A | 98 | 7.294 | 1.971  | 15.802 |
| ATOM | 1636 | HE22 | GLN | A | 98 | 6.593 | 1.949  | 17.416 |
| ATOM | 1637 | C    | GLN | A | 98 | 2.877 | -0.569 | 19.717 |
| ATOM | 1638 | O    | GLN | A | 98 | 1.721 | -0.569 | 19.302 |
| ATOM | 1639 | N    | ASP | A | 99 | 3.154 | -0.092 | 20.928 |
| ATOM | 1640 | H    | ASP | A | 99 | 4.110 | -0.079 | 21.268 |
| ATOM | 1641 | CA   | ASP | A | 99 | 2.126 | 0.540  | 21.764 |
| ATOM | 1642 | HA   | ASP | A | 99 | 1.196 | -0.007 | 21.612 |
| ATOM | 1643 | CB   | ASP | A | 99 | 2.452 | 0.362  | 23.248 |
| ATOM | 1644 | HB2  | ASP | A | 99 | 1.695 | 0.871  | 23.846 |
| ATOM | 1645 | HB3  | ASP | A | 99 | 2.395 | -0.694 | 23.500 |
| ATOM | 1646 | CG   | ASP | A | 99 | 3.838 | 0.858  | 23.631 |
| ATOM | 1647 | OD1  | ASP | A | 99 | 4.843 | 0.203  | 23.271 |

|      |      |      |     |   |     |        |        |        |
|------|------|------|-----|---|-----|--------|--------|--------|
| ATOM | 1648 | OD2  | ASP | A | 99  | 3.917  | 1.891  | 24.321 |
| ATOM | 1649 | C    | ASP | A | 99  | 1.839  | 1.999  | 21.355 |
| ATOM | 1650 | O    | ASP | A | 99  | 2.705  | 2.719  | 20.848 |
| ATOM | 1651 | N    | LEU | A | 100 | 0.573  | 2.407  | 21.514 |
| ATOM | 1652 | H    | LEU | A | 100 | -0.070 | 1.776  | 21.970 |
| ATOM | 1653 | CA   | LEU | A | 100 | 0.003  | 3.581  | 20.850 |
| ATOM | 1654 | HA   | LEU | A | 100 | 0.379  | 3.592  | 19.827 |
| ATOM | 1655 | CB   | LEU | A | 100 | -1.531 | 3.414  | 20.806 |
| ATOM | 1656 | HB2  | LEU | A | 100 | -1.773 | 2.440  | 20.374 |
| ATOM | 1657 | HB3  | LEU | A | 100 | -1.906 | 3.428  | 21.832 |
| ATOM | 1658 | CG   | LEU | A | 100 | -2.268 | 4.503  | 19.995 |
| ATOM | 1659 | HG   | LEU | A | 100 | -1.985 | 5.494  | 20.354 |
| ATOM | 1660 | CD1  | LEU | A | 100 | -1.952 | 4.406  | 18.497 |
| ATOM | 1661 | HD11 | LEU | A | 100 | -2.189 | 3.407  | 18.126 |
| ATOM | 1662 | HD12 | LEU | A | 100 | -2.542 | 5.133  | 17.941 |
| ATOM | 1663 | HD13 | LEU | A | 100 | -0.901 | 4.619  | 18.325 |
| ATOM | 1664 | CD2  | LEU | A | 100 | -3.780 | 4.342  | 20.187 |
| ATOM | 1665 | HD21 | LEU | A | 100 | -4.311 | 5.132  | 19.653 |
| ATOM | 1666 | HD22 | LEU | A | 100 | -4.101 | 3.374  | 19.801 |
| ATOM | 1667 | HD23 | LEU | A | 100 | -4.027 | 4.411  | 21.246 |
| ATOM | 1668 | C    | LEU | A | 100 | 0.421  | 4.902  | 21.513 |
| ATOM | 1669 | O    | LEU | A | 100 | 0.079  | 5.156  | 22.669 |
| ATOM | 1670 | N    | MET | A | 101 | 1.085  | 5.775  | 20.757 |
| ATOM | 1671 | H    | MET | A | 101 | 1.294  | 5.498  | 19.802 |
| ATOM | 1672 | CA   | MET | A | 101 | 1.434  | 7.155  | 21.137 |
| ATOM | 1673 | HA   | MET | A | 101 | 1.433  | 7.243  | 22.226 |
| ATOM | 1674 | CB   | MET | A | 101 | 2.861  | 7.460  | 20.640 |
| ATOM | 1675 | HB2  | MET | A | 101 | 2.900  | 7.360  | 19.554 |
| ATOM | 1676 | HB3  | MET | A | 101 | 3.130  | 8.489  | 20.884 |
| ATOM | 1677 | CG   | MET | A | 101 | 3.887  | 6.503  | 21.272 |
| ATOM | 1678 | HG2  | MET | A | 101 | 3.549  | 5.476  | 21.116 |
| ATOM | 1679 | HG3  | MET | A | 101 | 4.840  | 6.598  | 20.759 |
| ATOM | 1680 | SD   | MET | A | 101 | 4.183  | 6.759  | 23.037 |
| ATOM | 1681 | CE   | MET | A | 101 | 5.391  | 8.095  | 22.979 |
| ATOM | 1682 | HE1  | MET | A | 101 | 4.949  | 8.957  | 22.487 |
| ATOM | 1683 | HE2  | MET | A | 101 | 5.679  | 8.374  | 23.995 |
| ATOM | 1684 | HE3  | MET | A | 101 | 6.276  | 7.778  | 22.429 |
| ATOM | 1685 | C    | MET | A | 101 | 0.392  | 8.160  | 20.601 |
| ATOM | 1686 | O    | MET | A | 101 | -0.452 | 7.815  | 19.774 |
| ATOM | 1687 | N    | GLU | A | 102 | 0.433  | 9.406  | 21.076 |
| ATOM | 1688 | H    | GLU | A | 102 | 1.227  | 9.694  | 21.636 |
| ATOM | 1689 | CA   | GLU | A | 102 | -0.618 | 10.410 | 20.839 |
| ATOM | 1690 | HA   | GLU | A | 102 | -1.572 | 9.894  | 20.717 |
| ATOM | 1691 | CB   | GLU | A | 102 | -0.717 | 11.309 | 22.086 |
| ATOM | 1692 | HB2  | GLU | A | 102 | -0.739 | 10.679 | 22.977 |
| ATOM | 1693 | HB3  | GLU | A | 102 | 0.166  | 11.946 | 22.140 |
| ATOM | 1694 | CG   | GLU | A | 102 | -1.974 | 12.185 | 22.103 |
| ATOM | 1695 | HG2  | GLU | A | 102 | -2.030 | 12.777 | 21.194 |
| ATOM | 1696 | HG3  | GLU | A | 102 | -2.855 | 11.542 | 22.152 |
| ATOM | 1697 | CD   | GLU | A | 102 | -1.975 | 13.153 | 23.281 |
| ATOM | 1698 | OE1  | GLU | A | 102 | -1.050 | 13.984 | 23.395 |
| ATOM | 1699 | OE2  | GLU | A | 102 | -2.950 | 13.144 | 24.065 |
| ATOM | 1700 | C    | GLU | A | 102 | -0.375 | 11.260 | 19.576 |
| ATOM | 1701 | O    | GLU | A | 102 | -1.337 | 11.738 | 18.966 |
| ATOM | 1702 | N    | THR | A | 103 | 0.893  | 11.448 | 19.179 |
| ATOM | 1703 | H    | THR | A | 103 | 1.635  | 11.064 | 19.756 |
| ATOM | 1704 | CA   | THR | A | 103 | 1.322  | 12.261 | 18.030 |



|      |      |      |     |   |     |        |        |        |
|------|------|------|-----|---|-----|--------|--------|--------|
| ATOM | 1705 | HA   | THR | A | 103 | 0.806  | 11.894 | 17.145 |
| ATOM | 1706 | CB   | THR | A | 103 | 0.919  | 13.738 | 18.219 |
| ATOM | 1707 | HB   | THR | A | 103 | -0.151 | 13.793 | 18.401 |
| ATOM | 1708 | CG2  | THR | A | 103 | 1.626  | 14.438 | 19.381 |
| ATOM | 1709 | HG21 | THR | A | 103 | 2.702  | 14.454 | 19.216 |
| ATOM | 1710 | HG22 | THR | A | 103 | 1.262  | 15.462 | 19.464 |
| ATOM | 1711 | HG23 | THR | A | 103 | 1.414  | 13.916 | 20.314 |
| ATOM | 1712 | OG1  | THR | A | 103 | 1.166  | 14.454 | 17.036 |
| ATOM | 1713 | HG1  | THR | A | 103 | 2.116  | 14.668 | 17.013 |
| ATOM | 1714 | C    | THR | A | 103 | 2.818  | 12.099 | 17.782 |
| ATOM | 1715 | O    | THR | A | 103 | 3.559  | 11.629 | 18.642 |
| ATOM | 1716 | N    | ASP | C | 104 | 3.264  | 12.539 | 16.613 |
| ATOM | 1717 | H    | ASP | C | 104 | 2.580  | 12.859 | 15.934 |
| ATOM | 1718 | CA   | ASP | C | 104 | 4.629  | 12.998 | 16.373 |
| ATOM | 1719 | HA   | ASP | C | 104 | 5.333  | 12.310 | 16.842 |
| ATOM | 1720 | CB   | ASP | C | 104 | 4.877  | 12.991 | 14.862 |
| ATOM | 1721 | HB2  | ASP | C | 104 | 5.923  | 13.234 | 14.699 |
| ATOM | 1722 | HB3  | ASP | C | 104 | 4.707  | 11.988 | 14.470 |
| ATOM | 1723 | CG   | ASP | C | 104 | 3.994  | 13.996 | 14.110 |
| ATOM | 1724 | OD1  | ASP | C | 104 | 2.781  | 13.717 | 13.960 |
| ATOM | 1725 | OD2  | ASP | C | 104 | 4.532  | 15.050 | 13.704 |
| ATOM | 1726 | C    | ASP | C | 104 | 4.856  | 14.414 | 16.945 |
| ATOM | 1727 | O    | ASP | C | 104 | 3.922  | 15.221 | 17.012 |
| ATOM | 1728 | N    | LEU | A | 105 | 6.098  | 14.725 | 17.338 |
| ATOM | 1729 | H    | LEU | A | 105 | 6.805  | 13.997 | 17.314 |
| ATOM | 1730 | CA   | LEU | A | 105 | 6.474  | 16.028 | 17.898 |
| ATOM | 1731 | HA   | LEU | A | 105 | 5.759  | 16.256 | 18.688 |
| ATOM | 1732 | CB   | LEU | A | 105 | 7.885  | 15.932 | 18.522 |
| ATOM | 1733 | HB2  | LEU | A | 105 | 7.910  | 15.092 | 19.219 |
| ATOM | 1734 | HB3  | LEU | A | 105 | 8.597  | 15.720 | 17.724 |
| ATOM | 1735 | CG   | LEU | A | 105 | 8.335  | 17.211 | 19.268 |
| ATOM | 1736 | HG   | LEU | A | 105 | 8.252  | 18.068 | 18.601 |
| ATOM | 1737 | CD1  | LEU | A | 105 | 7.482  | 17.480 | 20.517 |
| ATOM | 1738 | HD11 | LEU | A | 105 | 7.535  | 16.631 | 21.200 |
| ATOM | 1739 | HD12 | LEU | A | 105 | 7.850  | 18.371 | 21.024 |
| ATOM | 1740 | HD13 | LEU | A | 105 | 6.444  | 17.656 | 20.237 |
| ATOM | 1741 | CD2  | LEU | A | 105 | 9.808  | 17.116 | 19.680 |
| ATOM | 1742 | HD21 | LEU | A | 105 | 10.109 | 18.026 | 20.200 |
| ATOM | 1743 | HD22 | LEU | A | 105 | 9.959  | 16.264 | 20.341 |
| ATOM | 1744 | HD23 | LEU | A | 105 | 10.431 | 17.009 | 18.792 |
| ATOM | 1745 | C    | LEU | A | 105 | 6.374  | 17.168 | 16.874 |
| ATOM | 1746 | O    | LEU | A | 105 | 6.058  | 18.294 | 17.258 |
| ATOM | 1747 | N    | TYR | A | 106 | 6.604  | 16.925 | 15.579 |
| ATOM | 1748 | H    | TYR | A | 106 | 6.827  | 15.979 | 15.296 |
| ATOM | 1749 | CA   | TYR | A | 106 | 6.470  | 17.977 | 14.557 |
| ATOM | 1750 | HA   | TYR | A | 106 | 7.095  | 18.811 | 14.865 |
| ATOM | 1751 | CB   | TYR | A | 106 | 6.995  | 17.506 | 13.196 |
| ATOM | 1752 | HB2  | TYR | A | 106 | 8.053  | 17.266 | 13.292 |
| ATOM | 1753 | HB3  | TYR | A | 106 | 6.462  | 16.601 | 12.912 |
| ATOM | 1754 | CG   | TYR | A | 106 | 6.828  | 18.540 | 12.096 |
| ATOM | 1755 | CD1  | TYR | A | 106 | 7.542  | 19.756 | 12.144 |
| ATOM | 1756 | HD1  | TYR | A | 106 | 8.263  | 19.941 | 12.932 |
| ATOM | 1757 | CE1  | TYR | A | 106 | 7.296  | 20.761 | 11.190 |
| ATOM | 1758 | HE1  | TYR | A | 106 | 7.832  | 21.700 | 11.256 |
| ATOM | 1759 | CZ   | TYR | A | 106 | 6.344  | 20.545 | 10.167 |
| ATOM | 1760 | OH   | TYR | A | 106 | 6.092  | 21.512 | 9.244  |
| ATOM | 1761 | HH   | TYR | A | 106 | 6.660  | 22.278 | 9.349  |

|      |      |      |     |   |     |        |        |        |
|------|------|------|-----|---|-----|--------|--------|--------|
| ATOM | 1762 | CE2  | TYR | A | 106 | 5.646  | 19.319 | 10.105 |
| ATOM | 1763 | HE2  | TYR | A | 106 | 4.918  | 19.154 | 9.325  |
| ATOM | 1764 | CD2  | TYR | A | 106 | 5.887  | 18.323 | 11.070 |
| ATOM | 1765 | HD2  | TYR | A | 106 | 5.327  | 17.397 | 11.040 |
| ATOM | 1766 | C    | TYR | A | 106 | 5.041  | 18.544 | 14.453 |
| ATOM | 1767 | O    | TYR | A | 106 | 4.883  | 19.716 | 14.117 |
| ATOM | 1768 | N    | LYS | A | 107 | 4.002  | 17.798 | 14.834 |
| ATOM | 1769 | H    | LYS | A | 107 | 4.159  | 16.806 | 15.008 |
| ATOM | 1770 | CA   | LYS | A | 107 | 2.644  | 18.345 | 14.952 |
| ATOM | 1771 | HA   | LYS | A | 107 | 2.377  | 18.775 | 13.984 |
| ATOM | 1772 | CB   | LYS | A | 107 | 1.680  | 17.183 | 15.239 |
| ATOM | 1773 | HB2  | LYS | A | 107 | 1.978  | 16.320 | 14.638 |
| ATOM | 1774 | HB3  | LYS | A | 107 | 1.748  | 16.912 | 16.293 |
| ATOM | 1775 | CG   | LYS | A | 107 | 0.233  | 17.559 | 14.884 |
| ATOM | 1776 | HG2  | LYS | A | 107 | -0.075 | 18.399 | 15.505 |
| ATOM | 1777 | HG3  | LYS | A | 107 | 0.190  | 17.873 | 13.840 |
| ATOM | 1778 | CD   | LYS | A | 107 | -0.761 | 16.413 | 15.103 |
| ATOM | 1779 | HD2  | LYS | A | 107 | -0.701 | 16.092 | 16.144 |
| ATOM | 1780 | HD3  | LYS | A | 107 | -1.764 | 16.802 | 14.918 |
| ATOM | 1781 | CE   | LYS | A | 107 | -0.512 | 15.219 | 14.172 |
| ATOM | 1782 | HE2  | LYS | A | 107 | -0.571 | 15.562 | 13.136 |
| ATOM | 1783 | HE3  | LYS | A | 107 | 0.498  | 14.828 | 14.343 |
| ATOM | 1784 | NZ   | LYS | A | 107 | -1.506 | 14.147 | 14.408 |
| ATOM | 1785 | HZ1  | LYS | A | 107 | -1.341 | 13.713 | 15.304 |
| ATOM | 1786 | HZ2  | LYS | A | 107 | -2.452 | 14.515 | 14.416 |
| ATOM | 1787 | HZ3  | LYS | A | 107 | -1.444 | 13.436 | 13.681 |
| ATOM | 1788 | C    | LYS | A | 107 | 2.538  | 19.492 | 15.986 |
| ATOM | 1789 | O    | LYS | A | 107 | 1.718  | 20.393 | 15.799 |
| ATOM | 1790 | N    | LEU | A | 108 | 3.389  | 19.497 | 17.027 |
| ATOM | 1791 | H    | LEU | A | 108 | 4.029  | 18.715 | 17.113 |
| ATOM | 1792 | CA   | LEU | A | 108 | 3.603  | 20.655 | 17.911 |
| ATOM | 1793 | HA   | LEU | A | 108 | 2.664  | 21.194 | 18.038 |
| ATOM | 1794 | CB   | LEU | A | 108 | 4.109  | 20.209 | 19.302 |
| ATOM | 1795 | HB2  | LEU | A | 108 | 4.979  | 19.560 | 19.187 |
| ATOM | 1796 | HB3  | LEU | A | 108 | 4.437  | 21.109 | 19.826 |
| ATOM | 1797 | CG   | LEU | A | 108 | 3.089  | 19.517 | 20.233 |
| ATOM | 1798 | HG   | LEU | A | 108 | 2.208  | 20.155 | 20.348 |
| ATOM | 1799 | CD1  | LEU | A | 108 | 2.631  | 18.135 | 19.737 |
| ATOM | 1800 | HD11 | LEU | A | 108 | 2.034  | 17.641 | 20.507 |
| ATOM | 1801 | HD12 | LEU | A | 108 | 2.005  | 18.241 | 18.853 |
| ATOM | 1802 | HD13 | LEU | A | 108 | 3.494  | 17.510 | 19.500 |
| ATOM | 1803 | CD2  | LEU | A | 108 | 3.737  | 19.345 | 21.619 |
| ATOM | 1804 | HD21 | LEU | A | 108 | 4.635  | 18.729 | 21.548 |
| ATOM | 1805 | HD22 | LEU | A | 108 | 4.009  | 20.321 | 22.025 |
| ATOM | 1806 | HD23 | LEU | A | 108 | 3.034  | 18.869 | 22.305 |
| ATOM | 1807 | C    | LEU | A | 108 | 4.606  | 21.629 | 17.282 |
| ATOM | 1808 | O    | LEU | A | 108 | 4.405  | 22.840 | 17.371 |
| ATOM | 1809 | N    | LEU | A | 109 | 5.664  | 21.096 | 16.664 |
| ATOM | 1810 | H    | LEU | A | 109 | 5.784  | 20.094 | 16.784 |
| ATOM | 1811 | CA   | LEU | A | 109 | 6.692  | 21.808 | 15.896 |
| ATOM | 1812 | HA   | LEU | A | 109 | 7.068  | 21.102 | 15.177 |
| ATOM | 1813 | CB   | LEU | A | 109 | 7.905  | 22.203 | 16.759 |
| ATOM | 1814 | HB2  | LEU | A | 109 | 8.622  | 22.757 | 16.148 |
| ATOM | 1815 | HB3  | LEU | A | 109 | 7.549  | 22.882 | 17.521 |
| ATOM | 1816 | CG   | LEU | A | 109 | 8.616  | 21.004 | 17.424 |
| ATOM | 1817 | HG   | LEU | A | 109 | 7.880  | 20.347 | 17.887 |
| ATOM | 1818 | CD1  | LEU | A | 109 | 9.457  | 20.188 | 16.432 |

|      |      |         |   |     |        |        |        |
|------|------|---------|---|-----|--------|--------|--------|
| ATOM | 1819 | HD11LEU | A | 109 | 10.258 | 20.802 | 16.020 |
| ATOM | 1820 | HD12LEU | A | 109 | 9.896  | 19.335 | 16.947 |
| ATOM | 1821 | HD13LEU | A | 109 | 8.841  | 19.821 | 15.616 |
| ATOM | 1822 | CD2 LEU | A | 109 | 9.531  | 21.507 | 18.538 |
| ATOM | 1823 | HD21LEU | A | 109 | 8.947  | 22.069 | 19.265 |
| ATOM | 1824 | HD22LEU | A | 109 | 9.998  | 20.661 | 19.040 |
| ATOM | 1825 | HD23LEU | A | 109 | 10.304 | 22.151 | 18.123 |
| ATOM | 1826 | C LEU   | A | 109 | 6.102  | 22.927 | 15.039 |
| ATOM | 1827 | O LEU   | A | 109 | 6.511  | 24.079 | 15.105 |
| ATOM | 1828 | N LYS   | A | 110 | 5.077  | 22.577 | 14.266 |
| ATOM | 1829 | H LYS   | A | 110 | 4.819  | 21.594 | 14.276 |
| ATOM | 1830 | CA LYS  | A | 110 | 4.426  | 23.431 | 13.272 |
| ATOM | 1831 | HA LYS  | A | 110 | 5.198  | 23.851 | 12.627 |
| ATOM | 1832 | CB LYS  | A | 110 | 3.532  | 22.485 | 12.443 |
| ATOM | 1833 | HB2 LYS | A | 110 | 4.040  | 21.524 | 12.347 |
| ATOM | 1834 | HB3 LYS | A | 110 | 2.593  | 22.308 | 12.970 |
| ATOM | 1835 | CG LYS  | A | 110 | 3.263  | 22.982 | 11.022 |
| ATOM | 1836 | HG2 LYS | A | 110 | 2.762  | 23.948 | 11.055 |
| ATOM | 1837 | HG3 LYS | A | 110 | 4.223  | 23.095 | 10.518 |
| ATOM | 1838 | CD LYS  | A | 110 | 2.389  | 21.983 | 10.247 |
| ATOM | 1839 | HD2 LYS | A | 110 | 2.722  | 20.966 | 10.467 |
| ATOM | 1840 | HD3 LYS | A | 110 | 1.352  | 22.087 | 10.573 |
| ATOM | 1841 | CE LYS  | A | 110 | 2.481  | 22.183 | 8.730  |
| ATOM | 1842 | HE2 LYS | A | 110 | 3.491  | 21.929 | 8.395  |
| ATOM | 1843 | HE3 LYS | A | 110 | 1.783  | 21.499 | 8.242  |
| ATOM | 1844 | NZ LYS  | A | 110 | 2.170  | 23.569 | 8.322  |
| ATOM | 1845 | HZ1 LYS | A | 110 | 2.847  | 24.224 | 8.695  |
| ATOM | 1846 | HZ2 LYS | A | 110 | 2.187  | 23.655 | 7.311  |
| ATOM | 1847 | HZ3 LYS | A | 110 | 1.256  | 23.864 | 8.651  |
| ATOM | 1848 | C LYS   | A | 110 | 3.636  | 24.634 | 13.845 |
| ATOM | 1849 | O LYS   | A | 110 | 3.214  | 25.493 | 13.063 |
| ATOM | 1850 | N THR   | A | 111 | 3.355  | 24.686 | 15.158 |
| ATOM | 1851 | H THR   | A | 111 | 3.750  | 23.967 | 15.752 |
| ATOM | 1852 | CA THR  | A | 111 | 2.298  | 25.545 | 15.741 |
| ATOM | 1853 | HA THR  | A | 111 | 2.199  | 26.447 | 15.135 |
| ATOM | 1854 | CB THR  | A | 111 | 0.942  | 24.814 | 15.724 |
| ATOM | 1855 | HB THR  | A | 111 | 0.238  | 25.368 | 16.345 |
| ATOM | 1856 | CG2 THR | A | 111 | 0.337  | 24.691 | 14.326 |
| ATOM | 1857 | HG21THR | A | 111 | -0.680 | 24.303 | 14.402 |
| ATOM | 1858 | HG22THR | A | 111 | 0.296  | 25.674 | 13.856 |
| ATOM | 1859 | HG23THR | A | 111 | 0.926  | 24.017 | 13.705 |
| ATOM | 1860 | OG1 THR | A | 111 | 1.116  | 23.517 | 16.249 |
| ATOM | 1861 | HG1 THR | A | 111 | 0.391  | 22.956 | 15.954 |
| ATOM | 1862 | C THR   | A | 111 | 2.599  | 26.047 | 17.154 |
| ATOM | 1863 | O THR   | A | 111 | 2.814  | 27.244 | 17.329 |
| ATOM | 1864 | N GLN   | A | 112 | 2.534  | 25.162 | 18.151 |
| ATOM | 1865 | H GLN   | A | 112 | 2.391  | 24.199 | 17.872 |
| ATOM | 1866 | CA GLN  | A | 112 | 2.376  | 25.499 | 19.571 |
| ATOM | 1867 | HA GLN  | A | 112 | 1.587  | 26.249 | 19.642 |
| ATOM | 1868 | CB GLN  | A | 112 | 1.930  | 24.237 | 20.339 |
| ATOM | 1869 | HB2 GLN | A | 112 | 1.026  | 23.847 | 19.868 |
| ATOM | 1870 | HB3 GLN | A | 112 | 2.715  | 23.484 | 20.252 |
| ATOM | 1871 | CG GLN  | A | 112 | 1.642  | 24.482 | 21.833 |
| ATOM | 1872 | HG2 GLN | A | 112 | 2.545  | 24.830 | 22.331 |
| ATOM | 1873 | HG3 GLN | A | 112 | 0.878  | 25.253 | 21.933 |
| ATOM | 1874 | CD GLN  | A | 112 | 1.183  | 23.217 | 22.558 |
| ATOM | 1875 | OE1 GLN | A | 112 | 1.906  | 22.239 | 22.672 |

|      |      |      |     |   |     |        |        |        |
|------|------|------|-----|---|-----|--------|--------|--------|
| ATOM | 1876 | NE2  | GLN | A | 112 | -0.024 | 23.174 | 23.082 |
| ATOM | 1877 | HE21 | GLN | A | 112 | -0.309 | 22.300 | 23.512 |
| ATOM | 1878 | HE22 | GLN | A | 112 | -0.673 | 23.932 | 22.962 |
| ATOM | 1879 | C    | GLN | A | 112 | 3.647  | 26.109 | 20.178 |
| ATOM | 1880 | O    | GLN | A | 112 | 4.756  | 25.664 | 19.908 |
| ATOM | 1881 | N    | HIE | A | 113 | 3.498  | 27.106 | 21.051 |
| ATOM | 1882 | H    | HIE | A | 113 | 2.565  | 27.418 | 21.286 |
| ATOM | 1883 | CA   | HIE | A | 113 | 4.613  | 27.719 | 21.790 |
| ATOM | 1884 | HA   | HIE | A | 113 | 5.409  | 27.965 | 21.084 |
| ATOM | 1885 | CB   | HIE | A | 113 | 4.073  | 29.026 | 22.398 |
| ATOM | 1886 | HB2  | HIE | A | 113 | 3.575  | 29.606 | 21.620 |
| ATOM | 1887 | HB3  | HIE | A | 113 | 3.331  | 28.788 | 23.163 |
| ATOM | 1888 | CG   | HIE | A | 113 | 5.117  | 29.915 | 23.010 |
| ATOM | 1889 | ND1  | HIE | A | 113 | 6.495  | 29.749 | 22.906 |
| ATOM | 1890 | CE1  | HIE | A | 113 | 7.040  | 30.776 | 23.570 |
| ATOM | 1891 | HE1  | HIE | A | 113 | 8.102  | 30.961 | 23.652 |
| ATOM | 1892 | NE2  | HIE | A | 113 | 6.083  | 31.562 | 24.089 |
| ATOM | 1893 | HE2  | HIE | A | 113 | 6.242  | 32.439 | 24.569 |
| ATOM | 1894 | CD2  | HIE | A | 113 | 4.862  | 31.028 | 23.750 |
| ATOM | 1895 | HD2  | HIE | A | 113 | 3.887  | 31.436 | 23.976 |
| ATOM | 1896 | C    | HIE | A | 113 | 5.213  | 26.789 | 22.877 |
| ATOM | 1897 | O    | HIE | A | 113 | 4.462  | 26.142 | 23.614 |
| ATOM | 1898 | N    | LEU | A | 114 | 6.545  | 26.761 | 23.035 |
| ATOM | 1899 | H    | LEU | A | 114 | 7.111  | 27.347 | 22.427 |
| ATOM | 1900 | CA   | LEU | A | 114 | 7.247  | 26.036 | 24.106 |
| ATOM | 1901 | HA   | LEU | A | 114 | 6.513  | 25.568 | 24.763 |
| ATOM | 1902 | CB   | LEU | A | 114 | 8.133  | 24.928 | 23.504 |
| ATOM | 1903 | HB2  | LEU | A | 114 | 8.874  | 25.399 | 22.853 |
| ATOM | 1904 | HB3  | LEU | A | 114 | 8.668  | 24.432 | 24.315 |
| ATOM | 1905 | CG   | LEU | A | 114 | 7.378  | 23.852 | 22.694 |
| ATOM | 1906 | HG   | LEU | A | 114 | 6.805  | 24.335 | 21.904 |
| ATOM | 1907 | CD1  | LEU | A | 114 | 8.399  | 22.912 | 22.045 |
| ATOM | 1908 | HD11 | LEU | A | 114 | 9.018  | 22.436 | 22.807 |
| ATOM | 1909 | HD12 | LEU | A | 114 | 7.885  | 22.142 | 21.468 |
| ATOM | 1910 | HD13 | LEU | A | 114 | 9.034  | 23.488 | 21.374 |
| ATOM | 1911 | CD2  | LEU | A | 114 | 6.416  | 23.014 | 23.548 |
| ATOM | 1912 | HD21 | LEU | A | 114 | 5.902  | 22.288 | 22.917 |
| ATOM | 1913 | HD22 | LEU | A | 114 | 6.977  | 22.481 | 24.315 |
| ATOM | 1914 | HD23 | LEU | A | 114 | 5.665  | 23.648 | 24.015 |
| ATOM | 1915 | C    | LEU | A | 114 | 8.078  | 26.994 | 24.976 |
| ATOM | 1916 | O    | LEU | A | 114 | 8.763  | 27.893 | 24.486 |
| ATOM | 1917 | N    | SER | A | 115 | 8.020  | 26.805 | 26.293 |
| ATOM | 1918 | H    | SER | A | 115 | 7.521  | 26.013 | 26.659 |
| ATOM | 1919 | CA   | SER | A | 115 | 8.712  | 27.654 | 27.267 |
| ATOM | 1920 | HA   | SER | A | 115 | 8.863  | 28.642 | 26.832 |
| ATOM | 1921 | CB   | SER | A | 115 | 7.808  | 27.824 | 28.493 |
| ATOM | 1922 | HB2  | SER | A | 115 | 8.247  | 28.580 | 29.142 |
| ATOM | 1923 | HB3  | SER | A | 115 | 6.830  | 28.178 | 28.168 |
| ATOM | 1924 | OG   | SER | A | 115 | 7.660  | 26.612 | 29.219 |
| ATOM | 1925 | HG   | SER | A | 115 | 6.743  | 26.519 | 29.525 |
| ATOM | 1926 | C    | SER | A | 115 | 10.101 | 27.102 | 27.645 |
| ATOM | 1927 | O    | SER | A | 115 | 10.371 | 25.915 | 27.490 |
| ATOM | 1928 | N    | ASN | A | 116 | 10.998 | 27.952 | 28.146 |
| ATOM | 1929 | H    | ASN | A | 116 | 10.704 | 28.900 | 28.328 |
| ATOM | 1930 | CA   | ASN | A | 116 | 12.434 | 27.668 | 28.304 |
| ATOM | 1931 | HA   | ASN | A | 116 | 12.865 | 27.552 | 27.307 |
| ATOM | 1932 | CB   | ASN | A | 116 | 13.032 | 28.921 | 28.965 |

|      |      |      |     |   |     |        |        |        |
|------|------|------|-----|---|-----|--------|--------|--------|
| ATOM | 1933 | HB2  | ASN | A | 116 | 12.624 | 29.806 | 28.475 |
| ATOM | 1934 | HB3  | ASN | A | 116 | 12.729 | 28.948 | 30.015 |
| ATOM | 1935 | CG   | ASN | A | 116 | 14.550 | 29.031 | 28.883 |
| ATOM | 1936 | OD1  | ASN | A | 116 | 15.208 | 28.400 | 28.069 |
| ATOM | 1937 | ND2  | ASN | A | 116 | 15.125 | 29.886 | 29.704 |
| ATOM | 1938 | HD21 | ASN | A | 116 | 16.125 | 30.042 | 29.652 |
| ATOM | 1939 | HD22 | ASN | A | 116 | 14.554 | 30.376 | 30.377 |
| ATOM | 1940 | C    | ASN | A | 116 | 12.774 | 26.387 | 29.113 |
| ATOM | 1941 | O    | ASN | A | 116 | 13.711 | 25.662 | 28.777 |
| ATOM | 1942 | N    | ASP | A | 117 | 12.026 | 26.086 | 30.177 |
| ATOM | 1943 | H    | ASP | A | 117 | 11.256 | 26.713 | 30.390 |
| ATOM | 1944 | CA   | ASP | A | 117 | 12.169 | 24.890 | 31.028 |
| ATOM | 1945 | HA   | ASP | A | 117 | 13.224 | 24.632 | 31.122 |
| ATOM | 1946 | CB   | ASP | A | 117 | 11.642 | 25.260 | 32.427 |
| ATOM | 1947 | HB2  | ASP | A | 117 | 12.289 | 26.030 | 32.847 |
| ATOM | 1948 | HB3  | ASP | A | 117 | 10.643 | 25.680 | 32.330 |
| ATOM | 1949 | CG   | ASP | A | 117 | 11.546 | 24.105 | 33.422 |
| ATOM | 1950 | OD1  | ASP | A | 117 | 12.481 | 23.280 | 33.531 |
| ATOM | 1951 | OD2  | ASP | A | 117 | 10.524 | 24.028 | 34.144 |
| ATOM | 1952 | C    | ASP | A | 117 | 11.440 | 23.660 | 30.445 |
| ATOM | 1953 | O    | ASP | A | 117 | 11.914 | 22.533 | 30.583 |
| ATOM | 1954 | N    | HIE | A | 118 | 10.338 | 23.866 | 29.719 |
| ATOM | 1955 | H    | HIE | A | 118 | 10.033 | 24.820 | 29.575 |
| ATOM | 1956 | CA   | HIE | A | 118 | 9.642  | 22.812 | 28.965 |
| ATOM | 1957 | HA   | HIE | A | 118 | 9.494  | 21.952 | 29.619 |
| ATOM | 1958 | CB   | HIE | A | 118 | 8.264  | 23.370 | 28.573 |
| ATOM | 1959 | HB2  | HIE | A | 118 | 7.771  | 23.737 | 29.473 |
| ATOM | 1960 | HB3  | HIE | A | 118 | 8.406  | 24.213 | 27.898 |
| ATOM | 1961 | CG   | HIE | A | 118 | 7.328  | 22.391 | 27.913 |
| ATOM | 1962 | ND1  | HIE | A | 118 | 7.303  | 21.008 | 28.108 |
| ATOM | 1963 | CE1  | HIE | A | 118 | 6.331  | 20.550 | 27.304 |
| ATOM | 1964 | HE1  | HIE | A | 118 | 6.063  | 19.508 | 27.200 |
| ATOM | 1965 | NE2  | HIE | A | 118 | 5.726  | 21.558 | 26.655 |
| ATOM | 1966 | HE2  | HIE | A | 118 | 4.966  | 21.463 | 25.991 |
| ATOM | 1967 | CD2  | HIE | A | 118 | 6.342  | 22.729 | 27.033 |
| ATOM | 1968 | HD2  | HIE | A | 118 | 6.096  | 23.724 | 26.698 |
| ATOM | 1969 | C    | HIE | A | 118 | 10.473 | 22.342 | 27.745 |
| ATOM | 1970 | O    | HIE | A | 118 | 10.562 | 21.148 | 27.458 |
| ATOM | 1971 | N    | ILE | A | 119 | 11.177 | 23.277 | 27.092 |
| ATOM | 1972 | H    | ILE | A | 119 | 11.000 | 24.241 | 27.365 |
| ATOM | 1973 | CA   | ILE | A | 119 | 12.230 | 23.013 | 26.093 |
| ATOM | 1974 | HA   | ILE | A | 119 | 11.811 | 22.423 | 25.277 |
| ATOM | 1975 | CB   | ILE | A | 119 | 12.773 | 24.343 | 25.504 |
| ATOM | 1976 | HB   | ILE | A | 119 | 13.000 | 25.023 | 26.324 |
| ATOM | 1977 | CG2  | ILE | A | 119 | 14.078 | 24.137 | 24.704 |
| ATOM | 1978 | HG21 | ILE | A | 119 | 14.453 | 25.086 | 24.326 |
| ATOM | 1979 | HG22 | ILE | A | 119 | 14.861 | 23.721 | 25.337 |
| ATOM | 1980 | HG23 | ILE | A | 119 | 13.897 | 23.464 | 23.868 |
| ATOM | 1981 | CG1  | ILE | A | 119 | 11.680 | 24.989 | 24.620 |
| ATOM | 1982 | HG12 | ILE | A | 119 | 11.432 | 24.311 | 23.805 |
| ATOM | 1983 | HG13 | ILE | A | 119 | 10.774 | 25.125 | 25.205 |
| ATOM | 1984 | CD1  | ILE | A | 119 | 12.057 | 26.359 | 24.042 |
| ATOM | 1985 | HD11 | ILE | A | 119 | 11.182 | 26.804 | 23.573 |
| ATOM | 1986 | HD12 | ILE | A | 119 | 12.404 | 27.020 | 24.836 |
| ATOM | 1987 | HD13 | ILE | A | 119 | 12.833 | 26.257 | 23.284 |
| ATOM | 1988 | C    | ILE | A | 119 | 13.333 | 22.146 | 26.701 |
| ATOM | 1989 | O    | ILE | A | 119 | 13.690 | 21.136 | 26.102 |

|      |      |     |     |   |     |        |        |        |
|------|------|-----|-----|---|-----|--------|--------|--------|
| ATOM | 1990 | N   | CYS | A | 120 | 13.836 | 22.488 | 27.894 |
| ATOM | 1991 | H   | CYS | A | 120 | 13.496 | 23.332 | 28.334 |
| ATOM | 1992 | CA  | CYS | A | 120 | 14.848 | 21.685 | 28.591 |
| ATOM | 1993 | HA  | CYS | A | 120 | 15.729 | 21.593 | 27.952 |
| ATOM | 1994 | CB  | CYS | A | 120 | 15.255 | 22.390 | 29.894 |
| ATOM | 1995 | HB2 | CYS | A | 120 | 14.377 | 22.617 | 30.502 |
| ATOM | 1996 | HB3 | CYS | A | 120 | 15.916 | 21.742 | 30.462 |
| ATOM | 1997 | SG  | CYS | A | 120 | 16.184 | 23.894 | 29.540 |
| ATOM | 1998 | HG  | CYS | A | 120 | 15.276 | 24.497 | 28.753 |
| ATOM | 1999 | C   | CYS | A | 120 | 14.361 | 20.250 | 28.858 |
| ATOM | 2000 | O   | CYS | A | 120 | 15.107 | 19.305 | 28.626 |
| ATOM | 2001 | N   | TYR | A | 121 | 13.118 | 20.070 | 29.315 |
| ATOM | 2002 | H   | TYR | A | 121 | 12.567 | 20.894 | 29.526 |
| ATOM | 2003 | CA  | TYR | A | 121 | 12.508 | 18.753 | 29.560 |
| ATOM | 2004 | HA  | TYR | A | 121 | 13.145 | 18.199 | 30.248 |
| ATOM | 2005 | CB  | TYR | A | 121 | 11.147 | 18.981 | 30.240 |
| ATOM | 2006 | HB2 | TYR | A | 121 | 11.312 | 19.317 | 31.262 |
| ATOM | 2007 | HB3 | TYR | A | 121 | 10.643 | 19.796 | 29.723 |
| ATOM | 2008 | CG  | TYR | A | 121 | 10.192 | 17.799 | 30.287 |
| ATOM | 2009 | CD1 | TYR | A | 121 | 10.613 | 16.529 | 30.738 |
| ATOM | 2010 | HD1 | TYR | A | 121 | 11.636 | 16.380 | 31.051 |
| ATOM | 2011 | CE1 | TYR | A | 121 | 9.696  | 15.458 | 30.792 |
| ATOM | 2012 | HE1 | TYR | A | 121 | 10.010 | 14.484 | 31.135 |
| ATOM | 2013 | CZ  | TYR | A | 121 | 8.348  | 15.663 | 30.417 |
| ATOM | 2014 | OH  | TYR | A | 121 | 7.442  | 14.648 | 30.475 |
| ATOM | 2015 | HH  | TYR | A | 121 | 7.838  | 13.773 | 30.621 |
| ATOM | 2016 | CE2 | TYR | A | 121 | 7.930  | 16.940 | 29.987 |
| ATOM | 2017 | HE2 | TYR | A | 121 | 6.900  | 17.109 | 29.718 |
| ATOM | 2018 | CD2 | TYR | A | 121 | 8.851  | 17.997 | 29.912 |
| ATOM | 2019 | HD2 | TYR | A | 121 | 8.520  | 18.973 | 29.583 |
| ATOM | 2020 | C   | TYR | A | 121 | 12.372 | 17.899 | 28.282 |
| ATOM | 2021 | O   | TYR | A | 121 | 12.724 | 16.713 | 28.290 |
| ATOM | 2022 | N   | PHE | A | 122 | 11.896 | 18.484 | 27.177 |
| ATOM | 2023 | H   | PHE | A | 122 | 11.603 | 19.455 | 27.234 |
| ATOM | 2024 | CA  | PHE | A | 122 | 11.829 | 17.820 | 25.871 |
| ATOM | 2025 | HA  | PHE | A | 122 | 11.307 | 16.870 | 25.971 |
| ATOM | 2026 | CB  | PHE | A | 122 | 11.045 | 18.705 | 24.880 |
| ATOM | 2027 | HB2 | PHE | A | 122 | 11.324 | 19.750 | 25.031 |
| ATOM | 2028 | HB3 | PHE | A | 122 | 11.366 | 18.439 | 23.872 |
| ATOM | 2029 | CG  | PHE | A | 122 | 9.521  | 18.602 | 24.883 |
| ATOM | 2030 | CD1 | PHE | A | 122 | 8.805  | 17.826 | 25.824 |
| ATOM | 2031 | HD1 | PHE | A | 122 | 9.312  | 17.319 | 26.630 |
| ATOM | 2032 | CE1 | PHE | A | 122 | 7.410  | 17.686 | 25.717 |
| ATOM | 2033 | HE1 | PHE | A | 122 | 6.873  | 17.075 | 26.429 |
| ATOM | 2034 | CZ  | PHE | A | 122 | 6.711  | 18.341 | 24.688 |
| ATOM | 2035 | HZ  | PHE | A | 122 | 5.639  | 18.229 | 24.602 |
| ATOM | 2036 | CE2 | PHE | A | 122 | 7.409  | 19.149 | 23.775 |
| ATOM | 2037 | HE2 | PHE | A | 122 | 6.873  | 19.667 | 22.992 |
| ATOM | 2038 | CD2 | PHE | A | 122 | 8.807  | 19.269 | 23.867 |
| ATOM | 2039 | HD2 | PHE | A | 122 | 9.340  | 19.866 | 23.141 |
| ATOM | 2040 | C   | PHE | A | 122 | 13.231 | 17.465 | 25.353 |
| ATOM | 2041 | O   | PHE | A | 122 | 13.484 | 16.300 | 25.042 |
| ATOM | 2042 | N   | LEU | A | 123 | 14.158 | 18.429 | 25.321 |
| ATOM | 2043 | H   | LEU | A | 123 | 13.887 | 19.364 | 25.622 |
| ATOM | 2044 | CA  | LEU | A | 123 | 15.541 | 18.239 | 24.870 |
| ATOM | 2045 | HA  | LEU | A | 123 | 15.519 | 17.930 | 23.825 |
| ATOM | 2046 | CB  | LEU | A | 123 | 16.255 | 19.599 | 24.999 |

|      |      |      |     |   |     |        |        |        |
|------|------|------|-----|---|-----|--------|--------|--------|
| ATOM | 2047 | HB2  | LEU | A | 123 | 15.646 | 20.358 | 24.510 |
| ATOM | 2048 | HB3  | LEU | A | 123 | 16.307 | 19.865 | 26.056 |
| ATOM | 2049 | CG   | LEU | A | 123 | 17.673 | 19.674 | 24.405 |
| ATOM | 2050 | HG   | LEU | A | 123 | 18.319 | 18.978 | 24.939 |
| ATOM | 2051 | CD1  | LEU | A | 123 | 17.711 | 19.323 | 22.909 |
| ATOM | 2052 | HD11 | LEU | A | 123 | 17.453 | 18.274 | 22.762 |
| ATOM | 2053 | HD12 | LEU | A | 123 | 17.012 | 19.950 | 22.356 |
| ATOM | 2054 | HD13 | LEU | A | 123 | 18.716 | 19.483 | 22.519 |
| ATOM | 2055 | CD2  | LEU | A | 123 | 18.207 | 21.100 | 24.606 |
| ATOM | 2056 | HD21 | LEU | A | 123 | 19.211 | 21.177 | 24.193 |
| ATOM | 2057 | HD22 | LEU | A | 123 | 17.558 | 21.820 | 24.108 |
| ATOM | 2058 | HD23 | LEU | A | 123 | 18.242 | 21.343 | 25.667 |
| ATOM | 2059 | C    | LEU | A | 123 | 16.248 | 17.129 | 25.662 |
| ATOM | 2060 | O    | LEU | A | 123 | 16.846 | 16.229 | 25.074 |
| ATOM | 2061 | N    | TYR | A | 124 | 16.110 | 17.142 | 26.989 |
| ATOM | 2062 | H    | TYR | A | 124 | 15.630 | 17.934 | 27.412 |
| ATOM | 2063 | CA   | TYR | A | 124 | 16.644 | 16.122 | 27.890 |
| ATOM | 2064 | HA   | TYR | A | 124 | 17.729 | 16.092 | 27.779 |
| ATOM | 2065 | CB   | TYR | A | 124 | 16.316 | 16.535 | 29.332 |
| ATOM | 2066 | HB2  | TYR | A | 124 | 16.898 | 17.419 | 29.587 |
| ATOM | 2067 | HB3  | TYR | A | 124 | 15.262 | 16.808 | 29.387 |
| ATOM | 2068 | CG   | TYR | A | 124 | 16.584 | 15.466 | 30.368 |
| ATOM | 2069 | CD1  | TYR | A | 124 | 17.895 | 15.000 | 30.585 |
| ATOM | 2070 | HD1  | TYR | A | 124 | 18.720 | 15.440 | 30.042 |
| ATOM | 2071 | CE1  | TYR | A | 124 | 18.130 | 13.952 | 31.495 |
| ATOM | 2072 | HE1  | TYR | A | 124 | 19.135 | 13.589 | 31.660 |
| ATOM | 2073 | CZ   | TYR | A | 124 | 17.044 | 13.389 | 32.201 |
| ATOM | 2074 | OH   | TYR | A | 124 | 17.237 | 12.366 | 33.070 |
| ATOM | 2075 | HH   | TYR | A | 124 | 18.151 | 12.016 | 33.065 |
| ATOM | 2076 | CE2  | TYR | A | 124 | 15.733 | 13.869 | 31.999 |
| ATOM | 2077 | HE2  | TYR | A | 124 | 14.911 | 13.429 | 32.544 |
| ATOM | 2078 | CD2  | TYR | A | 124 | 15.504 | 14.904 | 31.077 |
| ATOM | 2079 | HD2  | TYR | A | 124 | 14.499 | 15.265 | 30.909 |
| ATOM | 2080 | C    | TYR | A | 124 | 16.124 | 14.707 | 27.585 |
| ATOM | 2081 | O    | TYR | A | 124 | 16.922 | 13.769 | 27.589 |
| ATOM | 2082 | N    | GLN | A | 125 | 14.828 | 14.527 | 27.291 |
| ATOM | 2083 | H    | GLN | A | 125 | 14.213 | 15.334 | 27.280 |
| ATOM | 2084 | CA   | GLN | A | 125 | 14.297 | 13.206 | 26.917 |
| ATOM | 2085 | HA   | GLN | A | 125 | 14.563 | 12.485 | 27.691 |
| ATOM | 2086 | CB   | GLN | A | 125 | 12.761 | 13.235 | 26.780 |
| ATOM | 2087 | HB2  | GLN | A | 125 | 12.460 | 14.100 | 26.189 |
| ATOM | 2088 | HB3  | GLN | A | 125 | 12.456 | 12.338 | 26.238 |
| ATOM | 2089 | CG   | GLN | A | 125 | 12.021 | 13.243 | 28.130 |
| ATOM | 2090 | HG2  | GLN | A | 125 | 12.389 | 12.420 | 28.744 |
| ATOM | 2091 | HG3  | GLN | A | 125 | 12.224 | 14.176 | 28.654 |
| ATOM | 2092 | CD   | GLN | A | 125 | 10.506 | 13.070 | 27.964 |
| ATOM | 2093 | OE1  | GLN | A | 125 | 9.977  | 11.964 | 27.973 |
| ATOM | 2094 | NE2  | GLN | A | 125 | 9.747  | 14.131 | 27.799 |
| ATOM | 2095 | HE21 | GLN | A | 125 | 8.743  | 13.989 | 27.690 |
| ATOM | 2096 | HE22 | GLN | A | 125 | 10.133 | 15.057 | 27.858 |
| ATOM | 2097 | C    | GLN | A | 125 | 14.947 | 12.681 | 25.625 |
| ATOM | 2098 | O    | GLN | A | 125 | 15.311 | 11.507 | 25.568 |
| ATOM | 2099 | N    | ILE | A | 126 | 15.156 | 13.542 | 24.620 |
| ATOM | 2100 | H    | ILE | A | 126 | 14.851 | 14.505 | 24.738 |
| ATOM | 2101 | CA   | ILE | A | 126 | 15.797 | 13.155 | 23.349 |
| ATOM | 2102 | HA   | ILE | A | 126 | 15.284 | 12.277 | 22.952 |
| ATOM | 2103 | CB   | ILE | A | 126 | 15.721 | 14.295 | 22.302 |

|      |      |      |     |   |     |        |        |        |
|------|------|------|-----|---|-----|--------|--------|--------|
| ATOM | 2104 | HB   | ILE | A | 126 | 16.263 | 15.162 | 22.682 |
| ATOM | 2105 | CG2  | ILE | A | 126 | 16.381 | 13.845 | 20.979 |
| ATOM | 2106 | HG21 | ILE | A | 126 | 17.435 | 13.611 | 21.133 |
| ATOM | 2107 | HG22 | ILE | A | 126 | 15.874 | 12.963 | 20.587 |
| ATOM | 2108 | HG23 | ILE | A | 126 | 16.336 | 14.639 | 20.236 |
| ATOM | 2109 | CG1  | ILE | A | 126 | 14.256 | 14.708 | 22.049 |
| ATOM | 2110 | HG12 | ILE | A | 126 | 13.739 | 13.871 | 21.583 |
| ATOM | 2111 | HG13 | ILE | A | 126 | 13.757 | 14.908 | 22.992 |
| ATOM | 2112 | CD1  | ILE | A | 126 | 14.106 | 15.970 | 21.189 |
| ATOM | 2113 | HD11 | ILE | A | 126 | 14.405 | 15.770 | 20.162 |
| ATOM | 2114 | HD12 | ILE | A | 126 | 13.063 | 16.286 | 21.190 |
| ATOM | 2115 | HD13 | ILE | A | 126 | 14.715 | 16.776 | 21.599 |
| ATOM | 2116 | C    | ILE | A | 126 | 17.245 | 12.726 | 23.582 |
| ATOM | 2117 | O    | ILE | A | 126 | 17.627 | 11.622 | 23.192 |
| ATOM | 2118 | N    | LEU | A | 127 | 18.049 | 13.575 | 24.230 |
| ATOM | 2119 | H    | LEU | A | 127 | 17.662 | 14.460 | 24.543 |
| ATOM | 2120 | CA   | LEU | A | 127 | 19.468 | 13.296 | 24.472 |
| ATOM | 2121 | HA   | LEU | A | 127 | 19.949 | 13.065 | 23.522 |
| ATOM | 2122 | CB   | LEU | A | 127 | 20.143 | 14.533 | 25.092 |
| ATOM | 2123 | HB2  | LEU | A | 127 | 19.617 | 14.789 | 26.014 |
| ATOM | 2124 | HB3  | LEU | A | 127 | 21.168 | 14.268 | 25.355 |
| ATOM | 2125 | CG   | LEU | A | 127 | 20.182 | 15.779 | 24.179 |
| ATOM | 2126 | HG   | LEU | A | 127 | 19.165 | 16.081 | 23.938 |
| ATOM | 2127 | CD1  | LEU | A | 127 | 20.846 | 16.923 | 24.950 |
| ATOM | 2128 | HD11 | LEU | A | 127 | 20.303 | 17.081 | 25.879 |
| ATOM | 2129 | HD12 | LEU | A | 127 | 21.884 | 16.677 | 25.179 |
| ATOM | 2130 | HD13 | LEU | A | 127 | 20.812 | 17.841 | 24.365 |
| ATOM | 2131 | CD2  | LEU | A | 127 | 20.933 | 15.541 | 22.861 |
| ATOM | 2132 | HD21 | LEU | A | 127 | 20.400 | 14.816 | 22.248 |
| ATOM | 2133 | HD22 | LEU | A | 127 | 20.991 | 16.476 | 22.304 |
| ATOM | 2134 | HD23 | LEU | A | 127 | 21.942 | 15.181 | 23.062 |
| ATOM | 2135 | C    | LEU | A | 127 | 19.658 | 12.048 | 25.341 |
| ATOM | 2136 | O    | LEU | A | 127 | 20.559 | 11.257 | 25.071 |
| ATOM | 2137 | N    | ARG | A | 128 | 18.785 | 11.817 | 26.331 |
| ATOM | 2138 | H    | ARG | A | 128 | 18.056 | 12.501 | 26.499 |
| ATOM | 2139 | CA   | ARG | A | 128 | 18.823 | 10.620 | 27.177 |
| ATOM | 2140 | HA   | ARG | A | 128 | 19.822 | 10.550 | 27.609 |
| ATOM | 2141 | CB   | ARG | A | 128 | 17.816 | 10.785 | 28.324 |
| ATOM | 2142 | HB2  | ARG | A | 128 | 17.979 | 11.756 | 28.794 |
| ATOM | 2143 | HB3  | ARG | A | 128 | 16.794 | 10.742 | 27.942 |
| ATOM | 2144 | CG   | ARG | A | 128 | 18.023 | 9.703  | 29.386 |
| ATOM | 2145 | HG2  | ARG | A | 128 | 17.783 | 8.722  | 28.977 |
| ATOM | 2146 | HG3  | ARG | A | 128 | 19.070 | 9.714  | 29.685 |
| ATOM | 2147 | CD   | ARG | A | 128 | 17.149 | 9.962  | 30.612 |
| ATOM | 2148 | HD2  | ARG | A | 128 | 17.221 | 11.016 | 30.877 |
| ATOM | 2149 | HD3  | ARG | A | 128 | 16.107 | 9.740  | 30.375 |
| ATOM | 2150 | NE   | ARG | A | 128 | 17.608 | 9.161  | 31.752 |
| ATOM | 2151 | HE   | ARG | A | 128 | 18.248 | 9.628  | 32.396 |
| ATOM | 2152 | CZ   | ARG | A | 128 | 17.262 | 7.916  | 32.034 |
| ATOM | 2153 | NH1  | ARG | A | 128 | 16.416 | 7.236  | 31.292 |
| ATOM | 2154 | HH11 | ARG | A | 128 | 15.992 | 7.637  | 30.462 |
| ATOM | 2155 | HH12 | ARG | A | 128 | 16.099 | 6.344  | 31.643 |
| ATOM | 2156 | NH2  | ARG | A | 128 | 17.773 | 7.305  | 33.080 |
| ATOM | 2157 | HH21 | ARG | A | 128 | 18.446 | 7.754  | 33.696 |
| ATOM | 2158 | HH22 | ARG | A | 128 | 17.428 | 6.385  | 33.316 |
| ATOM | 2159 | C    | ARG | A | 128 | 18.572 | 9.326  | 26.386 |
| ATOM | 2160 | O    | ARG | A | 128 | 19.216 | 8.314  | 26.663 |



|      |      |      |     |   |     |        |        |        |
|------|------|------|-----|---|-----|--------|--------|--------|
| ATOM | 2161 | N    | GLY | A | 129 | 17.681 | 9.350  | 25.386 |
| ATOM | 2162 | H    | GLY | A | 129 | 17.165 | 10.210 | 25.219 |
| ATOM | 2163 | CA   | GLY | A | 129 | 17.454 | 8.211  | 24.487 |
| ATOM | 2164 | HA2  | GLY | A | 129 | 17.403 | 7.289  | 25.069 |
| ATOM | 2165 | HA3  | GLY | A | 129 | 16.522 | 8.363  | 23.944 |
| ATOM | 2166 | C    | GLY | A | 129 | 18.578 | 8.049  | 23.461 |
| ATOM | 2167 | O    | GLY | A | 129 | 19.014 | 6.927  | 23.199 |
| ATOM | 2168 | N    | LEU | A | 130 | 19.083 | 9.157  | 22.908 |
| ATOM | 2169 | H    | LEU | A | 130 | 18.662 | 10.050 | 23.152 |
| ATOM | 2170 | CA   | LEU | A | 130 | 20.175 | 9.160  | 21.929 |
| ATOM | 2171 | HA   | LEU | A | 130 | 19.893 | 8.496  | 21.113 |
| ATOM | 2172 | CB   | LEU | A | 130 | 20.335 | 10.595 | 21.386 |
| ATOM | 2173 | HB2  | LEU | A | 130 | 19.351 | 10.972 | 21.103 |
| ATOM | 2174 | HB3  | LEU | A | 130 | 20.718 | 11.227 | 22.189 |
| ATOM | 2175 | CG   | LEU | A | 130 | 21.268 | 10.725 | 20.164 |
| ATOM | 2176 | HG   | LEU | A | 130 | 22.266 | 10.387 | 20.440 |
| ATOM | 2177 | CD1  | LEU | A | 130 | 20.778 | 9.890  | 18.968 |
| ATOM | 2178 | HD11 | LEU | A | 130 | 21.370 | 10.125 | 18.084 |
| ATOM | 2179 | HD12 | LEU | A | 130 | 20.893 | 8.827  | 19.178 |
| ATOM | 2180 | HD13 | LEU | A | 130 | 19.731 | 10.110 | 18.759 |
| ATOM | 2181 | CD2  | LEU | A | 130 | 21.355 | 12.203 | 19.750 |
| ATOM | 2182 | HD21 | LEU | A | 130 | 20.374 | 12.563 | 19.437 |
| ATOM | 2183 | HD22 | LEU | A | 130 | 21.701 | 12.805 | 20.590 |
| ATOM | 2184 | HD23 | LEU | A | 130 | 22.058 | 12.317 | 18.925 |
| ATOM | 2185 | C    | LEU | A | 130 | 21.471 | 8.602  | 22.528 |
| ATOM | 2186 | O    | LEU | A | 130 | 22.156 | 7.815  | 21.879 |
| ATOM | 2187 | N    | LYS | A | 131 | 21.753 | 8.905  | 23.799 |
| ATOM | 2188 | H    | LYS | A | 131 | 21.179 | 9.606  | 24.256 |
| ATOM | 2189 | CA   | LYS | A | 131 | 22.883 | 8.361  | 24.564 |
| ATOM | 2190 | HA   | LYS | A | 131 | 23.801 | 8.769  | 24.144 |
| ATOM | 2191 | CB   | LYS | A | 131 | 22.717 | 8.854  | 26.012 |
| ATOM | 2192 | HB2  | LYS | A | 131 | 22.497 | 9.919  | 26.019 |
| ATOM | 2193 | HB3  | LYS | A | 131 | 21.873 | 8.345  | 26.470 |
| ATOM | 2194 | CG   | LYS | A | 131 | 23.964 | 8.611  | 26.861 |
| ATOM | 2195 | HG2  | LYS | A | 131 | 24.107 | 7.535  | 26.946 |
| ATOM | 2196 | HG3  | LYS | A | 131 | 24.825 | 9.068  | 26.369 |
| ATOM | 2197 | CD   | LYS | A | 131 | 23.797 | 9.211  | 28.263 |
| ATOM | 2198 | HD2  | LYS | A | 131 | 23.498 | 10.257 | 28.180 |
| ATOM | 2199 | HD3  | LYS | A | 131 | 23.021 | 8.669  | 28.803 |
| ATOM | 2200 | CE   | LYS | A | 131 | 25.114 | 9.150  | 29.041 |
| ATOM | 2201 | HE2  | LYS | A | 131 | 25.867 | 9.712  | 28.488 |
| ATOM | 2202 | HE3  | LYS | A | 131 | 24.995 | 9.628  | 30.020 |
| ATOM | 2203 | NZ   | LYS | A | 131 | 25.619 | 7.772  | 29.213 |
| ATOM | 2204 | HZ1  | LYS | A | 131 | 26.537 | 7.799  | 29.643 |
| ATOM | 2205 | HZ2  | LYS | A | 131 | 25.006 | 7.221  | 29.794 |
| ATOM | 2206 | HZ3  | LYS | A | 131 | 25.736 | 7.297  | 28.317 |
| ATOM | 2207 | C    | LYS | A | 131 | 22.981 | 6.820  | 24.503 |
| ATOM | 2208 | O    | LYS | A | 131 | 24.044 | 6.257  | 24.233 |
| ATOM | 2209 | N    | TYR | A | 132 | 21.861 | 6.122  | 24.705 |
| ATOM | 2210 | H    | TYR | A | 132 | 21.017 | 6.642  | 24.915 |
| ATOM | 2211 | CA   | TYR | A | 132 | 21.767 | 4.658  | 24.609 |
| ATOM | 2212 | HA   | TYR | A | 132 | 22.536 | 4.206  | 25.237 |
| ATOM | 2213 | CB   | TYR | A | 132 | 20.400 | 4.242  | 25.176 |
| ATOM | 2214 | HB2  | TYR | A | 132 | 20.347 | 4.569  | 26.216 |
| ATOM | 2215 | HB3  | TYR | A | 132 | 19.615 | 4.773  | 24.635 |
| ATOM | 2216 | CG   | TYR | A | 132 | 20.077 | 2.760  | 25.121 |
| ATOM | 2217 | CD1  | TYR | A | 132 | 20.226 | 1.945  | 26.262 |

|      |      |      |     |   |     |        |        |        |
|------|------|------|-----|---|-----|--------|--------|--------|
| ATOM | 2218 | HD1  | TYR | A | 132 | 20.623 | 2.362  | 27.178 |
| ATOM | 2219 | CE1  | TYR | A | 132 | 19.814 | 0.597  | 26.230 |
| ATOM | 2220 | HE1  | TYR | A | 132 | 19.887 | -0.008 | 27.122 |
| ATOM | 2221 | CZ   | TYR | A | 132 | 19.238 | 0.066  | 25.051 |
| ATOM | 2222 | OH   | TYR | A | 132 | 18.726 | -1.195 | 25.034 |
| ATOM | 2223 | HH   | TYR | A | 132 | 18.703 | -1.591 | 25.920 |
| ATOM | 2224 | CE2  | TYR | A | 132 | 19.125 | 0.874  | 23.900 |
| ATOM | 2225 | HE2  | TYR | A | 132 | 18.681 | 0.478  | 23.003 |
| ATOM | 2226 | CD2  | TYR | A | 132 | 19.545 | 2.214  | 23.939 |
| ATOM | 2227 | HD2  | TYR | A | 132 | 19.429 | 2.834  | 23.061 |
| ATOM | 2228 | C    | TYR | A | 132 | 21.996 | 4.139  | 23.170 |
| ATOM | 2229 | O    | TYR | A | 132 | 22.548 | 3.061  | 22.984 |
| ATOM | 2230 | N    | ILE | A | 133 | 21.628 | 4.902  | 22.137 |
| ATOM | 2231 | H    | ILE | A | 133 | 21.245 | 5.817  | 22.345 |
| ATOM | 2232 | CA   | ILE | A | 133 | 21.773 | 4.511  | 20.716 |
| ATOM | 2233 | HA   | ILE | A | 133 | 21.570 | 3.445  | 20.610 |
| ATOM | 2234 | CB   | ILE | A | 133 | 20.734 | 5.287  | 19.870 |
| ATOM | 2235 | HB   | ILE | A | 133 | 20.905 | 6.353  | 20.019 |
| ATOM | 2236 | CG2  | ILE | A | 133 | 20.883 | 4.986  | 18.367 |
| ATOM | 2237 | HG21 | ILE | A | 133 | 20.674 | 3.933  | 18.179 |
| ATOM | 2238 | HG22 | ILE | A | 133 | 20.191 | 5.596  | 17.787 |
| ATOM | 2239 | HG23 | ILE | A | 133 | 21.890 | 5.225  | 18.024 |
| ATOM | 2240 | CG1  | ILE | A | 133 | 19.294 | 4.941  | 20.329 |
| ATOM | 2241 | HG12 | ILE | A | 133 | 19.044 | 3.927  | 20.019 |
| ATOM | 2242 | HG13 | ILE | A | 133 | 19.224 | 4.974  | 21.415 |
| ATOM | 2243 | CD1  | ILE | A | 133 | 18.234 | 5.908  | 19.796 |
| ATOM | 2244 | HD11 | ILE | A | 133 | 17.271 | 5.665  | 20.245 |
| ATOM | 2245 | HD12 | ILE | A | 133 | 18.502 | 6.929  | 20.064 |
| ATOM | 2246 | HD13 | ILE | A | 133 | 18.148 | 5.829  | 18.714 |
| ATOM | 2247 | C    | ILE | A | 133 | 23.219 | 4.711  | 20.229 |
| ATOM | 2248 | O    | ILE | A | 133 | 23.793 | 3.828  | 19.585 |
| ATOM | 2249 | N    | HIE | A | 134 | 23.844 | 5.830  | 20.603 |
| ATOM | 2250 | H    | HIE | A | 134 | 23.312 | 6.541  | 21.098 |
| ATOM | 2251 | CA   | HIE | A | 134 | 25.255 | 6.096  | 20.322 |
| ATOM | 2252 | HA   | HIE | A | 134 | 25.429 | 5.925  | 19.257 |
| ATOM | 2253 | CB   | HIE | A | 134 | 25.563 | 7.577  | 20.624 |
| ATOM | 2254 | HB2  | HIE | A | 134 | 25.190 | 7.827  | 21.618 |
| ATOM | 2255 | HB3  | HIE | A | 134 | 26.646 | 7.705  | 20.640 |
| ATOM | 2256 | CG   | HIE | A | 134 | 25.010 | 8.577  | 19.626 |
| ATOM | 2257 | ND1  | HIE | A | 134 | 25.180 | 9.968  | 19.691 |
| ATOM | 2258 | CE1  | HIE | A | 134 | 24.579 | 10.460 | 18.592 |
| ATOM | 2259 | HE1  | HIE | A | 134 | 24.539 | 11.509 | 18.325 |
| ATOM | 2260 | NE2  | HIE | A | 134 | 24.075 | 9.466  | 17.840 |
| ATOM | 2261 | HE2  | HIE | A | 134 | 23.621 | 9.570  | 16.930 |
| ATOM | 2262 | CD2  | HIE | A | 134 | 24.332 | 8.277  | 18.479 |
| ATOM | 2263 | HD2  | HIE | A | 134 | 24.062 | 7.294  | 18.122 |
| ATOM | 2264 | C    | HIE | A | 134 | 26.187 | 5.124  | 21.077 |
| ATOM | 2265 | O    | HIE | A | 134 | 27.122 | 4.599  | 20.469 |
| ATOM | 2266 | N    | SER | A | 135 | 25.909 | 4.788  | 22.342 |
| ATOM | 2267 | H    | SER | A | 135 | 25.151 | 5.268  | 22.809 |
| ATOM | 2268 | CA   | SER | A | 135 | 26.661 | 3.731  | 23.053 |
| ATOM | 2269 | HA   | SER | A | 135 | 27.726 | 3.900  | 22.870 |
| ATOM | 2270 | CB   | SER | A | 135 | 26.483 | 3.830  | 24.575 |
| ATOM | 2271 | HB2  | SER | A | 135 | 26.963 | 2.973  | 25.046 |
| ATOM | 2272 | HB3  | SER | A | 135 | 27.005 | 4.720  | 24.924 |
| ATOM | 2273 | OG   | SER | A | 135 | 25.134 | 3.898  | 24.993 |
| ATOM | 2274 | HG   | SER | A | 135 | 24.845 | 4.823  | 24.875 |

|      |      |      |     |   |     |        |        |        |
|------|------|------|-----|---|-----|--------|--------|--------|
| ATOM | 2275 | C    | SER | A | 135 | 26.372 | 2.308  | 22.530 |
| ATOM | 2276 | O    | SER | A | 135 | 27.269 | 1.467  | 22.569 |
| ATOM | 2277 | N    | ALA | A | 136 | 25.196 | 2.046  | 21.942 |
| ATOM | 2278 | H    | ALA | A | 136 | 24.462 | 2.744  | 21.995 |
| ATOM | 2279 | CA   | ALA | A | 136 | 24.921 | 0.839  | 21.148 |
| ATOM | 2280 | HA   | ALA | A | 136 | 25.342 | -0.022 | 21.666 |
| ATOM | 2281 | CB   | ALA | A | 136 | 23.403 | 0.640  | 21.049 |
| ATOM | 2282 | HB1  | ALA | A | 136 | 23.200 | -0.292 | 20.529 |
| ATOM | 2283 | HB2  | ALA | A | 136 | 22.962 | 0.588  | 22.043 |
| ATOM | 2284 | HB3  | ALA | A | 136 | 22.951 | 1.461  | 20.496 |
| ATOM | 2285 | C    | ALA | A | 136 | 25.584 | 0.876  | 19.757 |
| ATOM | 2286 | O    | ALA | A | 136 | 25.388 | -0.030 | 18.950 |
| ATOM | 2287 | N    | ASN | A | 137 | 26.350 | 1.930  | 19.454 |
| ATOM | 2288 | H    | ASN | A | 137 | 26.439 | 2.648  | 20.159 |
| ATOM | 2289 | CA   | ASN | A | 137 | 27.185 | 2.089  | 18.262 |
| ATOM | 2290 | HA   | ASN | A | 137 | 27.729 | 3.024  | 18.401 |
| ATOM | 2291 | CB   | ASN | A | 137 | 28.236 | 0.961  | 18.188 |
| ATOM | 2292 | HB2  | ASN | A | 137 | 27.745 | 0.008  | 18.012 |
| ATOM | 2293 | HB3  | ASN | A | 137 | 28.894 | 1.115  | 17.336 |
| ATOM | 2294 | CG   | ASN | A | 137 | 29.103 | 0.895  | 19.446 |
| ATOM | 2295 | OD1  | ASN | A | 137 | 29.780 | 1.851  | 19.815 |
| ATOM | 2296 | ND2  | ASN | A | 137 | 29.096 | -0.224 | 20.149 |
| ATOM | 2297 | HD21 | ASN | A | 137 | 29.726 | -0.315 | 20.932 |
| ATOM | 2298 | HD22 | ASN | A | 137 | 28.462 | -0.978 | 19.901 |
| ATOM | 2299 | C    | ASN | A | 137 | 26.362 | 2.269  | 16.967 |
| ATOM | 2300 | O    | ASN | A | 137 | 26.875 | 2.042  | 15.869 |
| ATOM | 2301 | N    | VAL | A | 138 | 25.095 | 2.689  | 17.092 |
| ATOM | 2302 | H    | VAL | A | 138 | 24.760 | 2.918  | 18.029 |
| ATOM | 2303 | CA   | VAL | A | 138 | 24.181 | 2.947  | 15.967 |
| ATOM | 2304 | HA   | VAL | A | 138 | 24.538 | 2.399  | 15.101 |
| ATOM | 2305 | CB   | VAL | A | 138 | 22.758 | 2.424  | 16.287 |
| ATOM | 2306 | HB   | VAL | A | 138 | 22.473 | 2.792  | 17.271 |
| ATOM | 2307 | CG1  | VAL | A | 138 | 21.676 | 2.862  | 15.282 |
| ATOM | 2308 | HG11 | VAL | A | 138 | 20.721 | 2.403  | 15.542 |
| ATOM | 2309 | HG12 | VAL | A | 138 | 21.544 | 3.943  | 15.316 |
| ATOM | 2310 | HG13 | VAL | A | 138 | 21.953 | 2.558  | 14.272 |
| ATOM | 2311 | CG2  | VAL | A | 138 | 22.752 | 0.885  | 16.340 |
| ATOM | 2312 | HG21 | VAL | A | 138 | 23.445 | 0.530  | 17.103 |
| ATOM | 2313 | HG22 | VAL | A | 138 | 21.753 | 0.526  | 16.592 |
| ATOM | 2314 | HG23 | VAL | A | 138 | 23.043 | 0.474  | 15.372 |
| ATOM | 2315 | C    | VAL | A | 138 | 24.191 | 4.436  | 15.602 |
| ATOM | 2316 | O    | VAL | A | 138 | 24.287 | 5.296  | 16.476 |
| ATOM | 2317 | N    | LEU | A | 139 | 24.096 | 4.729  | 14.302 |
| ATOM | 2318 | H    | LEU | A | 139 | 24.075 | 3.953  | 13.645 |
| ATOM | 2319 | CA   | LEU | A | 139 | 23.802 | 6.053  | 13.742 |
| ATOM | 2320 | HA   | LEU | A | 139 | 23.989 | 6.839  | 14.476 |
| ATOM | 2321 | CB   | LEU | A | 139 | 24.666 | 6.281  | 12.483 |
| ATOM | 2322 | HB2  | LEU | A | 139 | 24.385 | 5.537  | 11.737 |
| ATOM | 2323 | HB3  | LEU | A | 139 | 24.427 | 7.268  | 12.082 |
| ATOM | 2324 | CG   | LEU | A | 139 | 26.189 | 6.189  | 12.694 |
| ATOM | 2325 | HG   | LEU | A | 139 | 26.450 | 5.190  | 13.048 |
| ATOM | 2326 | CD1  | LEU | A | 139 | 26.914 | 6.433  | 11.362 |
| ATOM | 2327 | HD11 | LEU | A | 139 | 27.990 | 6.332  | 11.505 |
| ATOM | 2328 | HD12 | LEU | A | 139 | 26.591 | 5.699  | 10.624 |
| ATOM | 2329 | HD13 | LEU | A | 139 | 26.698 | 7.436  | 10.991 |
| ATOM | 2330 | CD2  | LEU | A | 139 | 26.657 | 7.219  | 13.723 |
| ATOM | 2331 | HD21 | LEU | A | 139 | 27.741 | 7.195  | 13.783 |

|      |      |         |     |       |        |        |        |
|------|------|---------|-----|-------|--------|--------|--------|
| ATOM | 2332 | HD22LEU | A   | 139   | 26.334 | 8.213  | 13.415 |
| ATOM | 2333 | HD23LEU | A   | 139   | 26.247 | 6.994  | 14.707 |
| ATOM | 2334 | C       | LEU | A 139 | 22.319 | 6.099  | 13.366 |
| ATOM | 2335 | O       | LEU | A 139 | 21.856 | 5.216  | 12.639 |
| ATOM | 2336 | N       | HIE | C 140 | 21.571 | 7.113  | 13.815 |
| ATOM | 2337 | H       | HIE | C 140 | 22.005 | 7.869  | 14.345 |
| ATOM | 2338 | CA      | HIE | C 140 | 20.130 | 7.188  | 13.527 |
| ATOM | 2339 | HA      | HIE | C 140 | 19.712 | 6.183  | 13.620 |
| ATOM | 2340 | CB      | HIE | C 140 | 19.429 | 8.062  | 14.578 |
| ATOM | 2341 | HB2     | HIE | C 140 | 19.664 | 7.689  | 15.575 |
| ATOM | 2342 | HB3     | HIE | C 140 | 19.783 | 9.091  | 14.502 |
| ATOM | 2343 | CG      | HIE | C 140 | 17.936 | 8.048  | 14.388 |
| ATOM | 2344 | ND1     | HIE | C 140 | 17.253 | 8.832  | 13.461 |
| ATOM | 2345 | CE1     | HIE | C 140 | 15.980 | 8.406  | 13.500 |
| ATOM | 2346 | HE1     | HIE | C 140 | 15.186 | 8.778  | 12.866 |
| ATOM | 2347 | NE2     | HIE | C 140 | 15.832 | 7.415  | 14.396 |
| ATOM | 2348 | HE2     | HIE | C 140 | 14.977 | 6.876  | 14.530 |
| ATOM | 2349 | CD2     | HIE | C 140 | 17.064 | 7.170  | 14.964 |
| ATOM | 2350 | HD2     | HIE | C 140 | 17.307 | 6.391  | 15.669 |
| ATOM | 2351 | C       | HIE | C 140 | 19.840 | 7.648  | 12.082 |
| ATOM | 2352 | O       | HIE | C 140 | 19.053 | 7.010  | 11.382 |
| ATOM | 2353 | N       | ARG | C 141 | 20.512 | 8.712  | 11.615 |
| ATOM | 2354 | H       | ARG | C 141 | 21.072 | 9.230  | 12.292 |
| ATOM | 2355 | CA      | ARG | C 141 | 20.613 | 9.135  | 10.199 |
| ATOM | 2356 | HA      | ARG | C 141 | 21.418 | 9.869  | 10.164 |
| ATOM | 2357 | CB      | ARG | C 141 | 21.036 | 7.974  | 9.256  |
| ATOM | 2358 | HB2     | ARG | C 141 | 20.260 | 7.208  | 9.231  |
| ATOM | 2359 | HB3     | ARG | C 141 | 21.134 | 8.360  | 8.241  |
| ATOM | 2360 | CG      | ARG | C 141 | 22.384 | 7.338  | 9.641  |
| ATOM | 2361 | HG2     | ARG | C 141 | 23.190 | 8.041  | 9.438  |
| ATOM | 2362 | HG3     | ARG | C 141 | 22.383 | 7.123  | 10.707 |
| ATOM | 2363 | CD      | ARG | C 141 | 22.666 | 6.013  | 8.919  |
| ATOM | 2364 | HD2     | ARG | C 141 | 23.438 | 5.485  | 9.481  |
| ATOM | 2365 | HD3     | ARG | C 141 | 21.769 | 5.401  | 8.951  |
| ATOM | 2366 | NE      | ARG | C 141 | 23.159 | 6.180  | 7.537  |
| ATOM | 2367 | HE      | ARG | C 141 | 23.726 | 6.991  | 7.356  |
| ATOM | 2368 | CZ      | ARG | C 141 | 23.172 | 5.220  | 6.613  |
| ATOM | 2369 | NH1     | ARG | C 141 | 22.392 | 4.163  | 6.668  |
| ATOM | 2370 | HH11    | ARG | C 141 | 21.603 | 4.144  | 7.305  |
| ATOM | 2371 | HH12    | ARG | C 141 | 22.413 | 3.506  | 5.885  |
| ATOM | 2372 | NH2     | ARG | C 141 | 23.992 | 5.293  | 5.592  |
| ATOM | 2373 | HH21    | ARG | C 141 | 24.502 | 6.122  | 5.341  |
| ATOM | 2374 | HH22    | ARG | C 141 | 24.104 | 4.461  | 5.011  |
| ATOM | 2375 | C       | ARG | C 141 | 19.366 | 9.862  | 9.649  |
| ATOM | 2376 | O       | ARG | C 141 | 19.427 | 10.326 | 8.514  |
| ATOM | 2377 | N       | ASB | C 142 | 18.261 | 9.995  | 10.402 |
| ATOM | 2378 | H       | ASB | C 142 | 18.228 | 9.501  | 11.288 |
| ATOM | 2379 | CA      | ASB | C 142 | 17.090 | 10.821 | 10.020 |
| ATOM | 2380 | HA      | ASB | C 142 | 17.474 | 11.753 | 9.597  |
| ATOM | 2381 | C       | ASB | C 142 | 16.216 | 11.240 | 11.225 |
| ATOM | 2382 | O       | ASB | C 142 | 15.009 | 11.013 | 11.234 |
| ATOM | 2383 | N       | LEU | C 143 | 16.829 | 11.824 | 12.264 |
| ATOM | 2384 | H       | LEU | C 143 | 17.816 | 12.008 | 12.155 |
| ATOM | 2385 | CA      | LEU | C 143 | 16.250 | 12.100 | 13.597 |
| ATOM | 2386 | HA      | LEU | C 143 | 15.755 | 11.184 | 13.916 |
| ATOM | 2387 | CB      | LEU | C 143 | 17.440 | 12.378 | 14.554 |
| ATOM | 2388 | HB2     | LEU | C 143 | 18.218 | 11.640 | 14.347 |

|      |      |      |     |   |     |        |        |        |
|------|------|------|-----|---|-----|--------|--------|--------|
| ATOM | 2389 | HB3  | LEU | C | 143 | 17.847 | 13.357 | 14.307 |
| ATOM | 2390 | CG   | LEU | C | 143 | 17.174 | 12.339 | 16.079 |
| ATOM | 2391 | HG   | LEU | C | 143 | 16.456 | 13.110 | 16.351 |
| ATOM | 2392 | CD1  | LEU | C | 143 | 16.633 | 10.983 | 16.559 |
| ATOM | 2393 | HD11 | LEU | C | 143 | 17.328 | 10.187 | 16.294 |
| ATOM | 2394 | HD12 | LEU | C | 143 | 16.507 | 10.999 | 17.642 |
| ATOM | 2395 | HD13 | LEU | C | 143 | 15.662 | 10.783 | 16.106 |
| ATOM | 2396 | CD2  | LEU | C | 143 | 18.476 | 12.656 | 16.831 |
| ATOM | 2397 | HD21 | LEU | C | 143 | 18.285 | 12.690 | 17.905 |
| ATOM | 2398 | HD22 | LEU | C | 143 | 19.225 | 11.890 | 16.628 |
| ATOM | 2399 | HD23 | LEU | C | 143 | 18.861 | 13.627 | 16.517 |
| ATOM | 2400 | C    | LEU | C | 143 | 15.149 | 13.194 | 13.608 |
| ATOM | 2401 | O    | LEU | C | 143 | 14.858 | 13.796 | 14.639 |
| ATOM | 2402 | N    | LYB | C | 144 | 14.526 | 13.502 | 12.468 |
| ATOM | 2403 | H    | LYB | C | 144 | 14.721 | 12.925 | 11.659 |
| ATOM | 2404 | CA   | LYB | C | 144 | 13.547 | 14.589 | 12.346 |
| ATOM | 2405 | HA   | LYB | C | 144 | 14.025 | 15.445 | 12.822 |
| ATOM | 2406 | CB   | LYB | C | 144 | 13.358 | 14.983 | 10.869 |
| ATOM | 2407 | HB2  | LYB | C | 144 | 12.536 | 15.696 | 10.788 |
| ATOM | 2408 | HB3  | LYB | C | 144 | 14.262 | 15.519 | 10.577 |
| ATOM | 2409 | CG   | LYB | C | 144 | 13.163 | 13.870 | 9.823  |
| ATOM | 2410 | HG2  | LYB | C | 144 | 13.190 | 14.377 | 8.858  |
| ATOM | 2411 | HG3  | LYB | C | 144 | 14.008 | 13.183 | 9.856  |
| ATOM | 2412 | CD   | LYB | C | 144 | 11.853 | 13.072 | 9.905  |
| ATOM | 2413 | HD2  | LYB | C | 144 | 11.951 | 12.280 | 10.646 |
| ATOM | 2414 | HD3  | LYB | C | 144 | 11.056 | 13.750 | 10.187 |
| ATOM | 2415 | C    | LYB | C | 144 | 12.226 | 14.353 | 13.129 |
| ATOM | 2416 | O    | LYB | C | 144 | 11.722 | 13.225 | 13.193 |
| ATOM | 2417 | N    | PRO | C | 145 | 11.623 | 15.411 | 13.717 |
| ATOM | 2418 | CD   | PRO | C | 145 | 12.059 | 16.798 | 13.629 |
| ATOM | 2419 | HD2  | PRO | C | 145 | 12.118 | 17.136 | 12.594 |
| ATOM | 2420 | HD3  | PRO | C | 145 | 13.029 | 16.908 | 14.115 |
| ATOM | 2421 | CG   | PRO | C | 145 | 11.022 | 17.624 | 14.382 |
| ATOM | 2422 | HG2  | PRO | C | 145 | 10.212 | 17.887 | 13.704 |
| ATOM | 2423 | HG3  | PRO | C | 145 | 11.453 | 18.521 | 14.825 |
| ATOM | 2424 | CB   | PRO | C | 145 | 10.523 | 16.652 | 15.445 |
| ATOM | 2425 | HB2  | PRO | C | 145 | 9.513  | 16.902 | 15.770 |
| ATOM | 2426 | HB3  | PRO | C | 145 | 11.204 | 16.665 | 16.298 |
| ATOM | 2427 | CA   | PRO | C | 145 | 10.603 | 15.280 | 14.761 |
| ATOM | 2428 | HA   | PRO | C | 145 | 10.965 | 14.565 | 15.500 |
| ATOM | 2429 | C    | PRO | C | 145 | 9.226  | 14.773 | 14.308 |
| ATOM | 2430 | O    | PRO | C | 145 | 8.441  | 14.394 | 15.171 |
| ATOM | 2431 | N    | SER | C | 146 | 8.919  | 14.668 | 13.009 |
| ATOM | 2432 | H    | SER | C | 146 | 9.569  | 14.962 | 12.296 |
| ATOM | 2433 | CA   | SER | C | 146 | 7.681  | 14.020 | 12.516 |
| ATOM | 2434 | HA   | SER | C | 146 | 6.824  | 14.418 | 13.071 |
| ATOM | 2435 | CB   | SER | C | 146 | 7.481  | 14.371 | 11.033 |
| ATOM | 2436 | HB2  | SER | C | 146 | 6.650  | 13.786 | 10.619 |
| ATOM | 2437 | HB3  | SER | C | 146 | 7.236  | 15.438 | 10.967 |
| ATOM | 2438 | OG   | SER | C | 146 | 8.663  | 14.133 | 10.286 |
| ATOM | 2439 | HG   | SER | C | 146 | 8.787  | 14.908 | 9.687  |
| ATOM | 2440 | C    | SER | C | 146 | 7.671  | 12.495 | 12.731 |
| ATOM | 2441 | O    | SER | C | 146 | 6.741  | 11.795 | 12.336 |
| ATOM | 2442 | N    | ASN | C | 147 | 8.714  | 11.945 | 13.358 |
| ATOM | 2443 | H    | ASN | C | 147 | 9.496  | 12.558 | 13.566 |
| ATOM | 2444 | CA   | ASN | C | 147 | 8.809  | 10.544 | 13.790 |
| ATOM | 2445 | HA   | ASN | C | 147 | 7.918  | 9.983  | 13.501 |

|      |      |      |     |   |     |        |        |        |
|------|------|------|-----|---|-----|--------|--------|--------|
| ATOM | 2446 | CB   | ASN | C | 147 | 10.054 | 9.947  | 13.145 |
| ATOM | 2447 | HB2  | ASN | C | 147 | 10.889 | 10.626 | 13.252 |
| ATOM | 2448 | HB3  | ASN | C | 147 | 10.307 | 9.019  | 13.640 |
| ATOM | 2449 | CG   | ASN | C | 147 | 9.890  | 9.635  | 11.681 |
| ATOM | 2450 | OD1  | ASN | C | 147 | 10.644 | 8.833  | 11.165 |
| ATOM | 2451 | ND2  | ASN | C | 147 | 8.893  | 10.129 | 10.963 |
| ATOM | 2452 | HD21 | ASN | C | 147 | 8.803  | 10.041 | 9.949  |
| ATOM | 2453 | HD22 | ASN | C | 147 | 8.217  | 10.734 | 11.421 |
| ATOM | 2454 | C    | ASN | C | 147 | 8.959  | 10.386 | 15.303 |
| ATOM | 2455 | O    | ASN | C | 147 | 8.873  | 9.276  | 15.827 |
| ATOM | 2456 | N    | LEU | A | 148 | 9.285  | 11.471 | 16.006 |
| ATOM | 2457 | H    | LEU | A | 148 | 9.222  | 12.377 | 15.555 |
| ATOM | 2458 | CA   | LEU | A | 148 | 9.651  | 11.450 | 17.416 |
| ATOM | 2459 | HA   | LEU | A | 148 | 10.190 | 10.527 | 17.622 |
| ATOM | 2460 | CB   | LEU | A | 148 | 10.566 | 12.663 | 17.640 |
| ATOM | 2461 | HB2  | LEU | A | 148 | 11.342 | 12.666 | 16.870 |
| ATOM | 2462 | HB3  | LEU | A | 148 | 9.955  | 13.558 | 17.511 |
| ATOM | 2463 | CG   | LEU | A | 148 | 11.238 | 12.694 | 19.013 |
| ATOM | 2464 | HG   | LEU | A | 148 | 10.476 | 12.567 | 19.778 |
| ATOM | 2465 | CD1  | LEU | A | 148 | 12.288 | 11.588 | 19.178 |
| ATOM | 2466 | HD11 | LEU | A | 148 | 12.759 | 11.672 | 20.158 |
| ATOM | 2467 | HD12 | LEU | A | 148 | 11.815 | 10.614 | 19.106 |
| ATOM | 2468 | HD13 | LEU | A | 148 | 13.052 | 11.670 | 18.405 |
| ATOM | 2469 | CD2  | LEU | A | 148 | 11.898 | 14.060 | 19.182 |
| ATOM | 2470 | HD21 | LEU | A | 148 | 11.225 | 14.849 | 18.861 |
| ATOM | 2471 | HD22 | LEU | A | 148 | 12.112 | 14.216 | 20.232 |
| ATOM | 2472 | HD23 | LEU | A | 148 | 12.816 | 14.122 | 18.598 |
| ATOM | 2473 | C    | LEU | A | 148 | 8.350  | 11.454 | 18.224 |
| ATOM | 2474 | O    | LEU | A | 148 | 7.613  | 12.437 | 18.196 |
| ATOM | 2475 | N    | LEU | C | 149 | 8.034  | 10.326 | 18.861 |
| ATOM | 2476 | H    | LEU | C | 149 | 8.728  | 9.595  | 18.940 |
| ATOM | 2477 | CA   | LEU | C | 149 | 6.677  | 10.035 | 19.318 |
| ATOM | 2478 | HA   | LEU | C | 149 | 5.964  | 10.512 | 18.643 |
| ATOM | 2479 | CB   | LEU | C | 149 | 6.430  | 8.515  | 19.321 |
| ATOM | 2480 | HB2  | LEU | C | 149 | 7.128  | 8.065  | 20.031 |
| ATOM | 2481 | HB3  | LEU | C | 149 | 5.420  | 8.367  | 19.697 |
| ATOM | 2482 | CG   | LEU | C | 149 | 6.560  | 7.792  | 17.965 |
| ATOM | 2483 | HG   | LEU | C | 149 | 7.570  | 7.940  | 17.585 |
| ATOM | 2484 | CD1  | LEU | C | 149 | 6.352  | 6.290  | 18.183 |
| ATOM | 2485 | HD11 | LEU | C | 149 | 5.353  | 6.093  | 18.563 |
| ATOM | 2486 | HD12 | LEU | C | 149 | 6.477  | 5.767  | 17.242 |
| ATOM | 2487 | HD13 | LEU | C | 149 | 7.087  | 5.909  | 18.888 |
| ATOM | 2488 | CD2  | LEU | C | 149 | 5.553  | 8.322  | 16.936 |
| ATOM | 2489 | HD21 | LEU | C | 149 | 5.743  | 9.372  | 16.723 |
| ATOM | 2490 | HD22 | LEU | C | 149 | 5.661  | 7.766  | 16.008 |
| ATOM | 2491 | HD23 | LEU | C | 149 | 4.534  | 8.208  | 17.307 |
| ATOM | 2492 | C    | LEU | C | 149 | 6.429  | 10.621 | 20.708 |
| ATOM | 2493 | O    | LEU | C | 149 | 7.203  | 10.377 | 21.633 |
| ATOM | 2494 | N    | LEU | A | 150 | 5.298  | 11.308 | 20.866 |
| ATOM | 2495 | H    | LEU | A | 150 | 4.702  | 11.428 | 20.050 |
| ATOM | 2496 | CA   | LEU | A | 150 | 4.848  | 11.953 | 22.100 |
| ATOM | 2497 | HA   | LEU | A | 150 | 5.603  | 11.819 | 22.875 |
| ATOM | 2498 | CB   | LEU | A | 150 | 4.707  | 13.456 | 21.783 |
| ATOM | 2499 | HB2  | LEU | A | 150 | 5.649  | 13.809 | 21.355 |
| ATOM | 2500 | HB3  | LEU | A | 150 | 3.946  | 13.561 | 21.009 |
| ATOM | 2501 | CG   | LEU | A | 150 | 4.336  | 14.365 | 22.969 |
| ATOM | 2502 | HG   | LEU | A | 150 | 3.405  | 14.007 | 23.408 |

|      |      |      |     |   |     |        |        |        |
|------|------|------|-----|---|-----|--------|--------|--------|
| ATOM | 2503 | CD1  | LEU | A | 150 | 5.424  | 14.386 | 24.051 |
| ATOM | 2504 | HD11 | LEU | A | 150 | 5.158  | 15.113 | 24.815 |
| ATOM | 2505 | HD12 | LEU | A | 150 | 5.518  | 13.407 | 24.517 |
| ATOM | 2506 | HD13 | LEU | A | 150 | 6.381  | 14.678 | 23.622 |
| ATOM | 2507 | CD2  | LEU | A | 150 | 4.115  | 15.786 | 22.441 |
| ATOM | 2508 | HD21 | LEU | A | 150 | 5.028  | 16.167 | 21.986 |
| ATOM | 2509 | HD22 | LEU | A | 150 | 3.320  | 15.784 | 21.698 |
| ATOM | 2510 | HD23 | LEU | A | 150 | 3.822  | 16.441 | 23.258 |
| ATOM | 2511 | C    | LEU | A | 150 | 3.536  | 11.305 | 22.572 |
| ATOM | 2512 | O    | LEU | A | 150 | 2.629  | 11.059 | 21.774 |
| ATOM | 2513 | N    | ASN | A | 151 | 3.425  | 11.022 | 23.869 |
| ATOM | 2514 | H    | ASN | A | 151 | 4.239  | 11.178 | 24.454 |
| ATOM | 2515 | CA   | ASN | A | 151 | 2.196  | 10.533 | 24.511 |
| ATOM | 2516 | HA   | ASN | A | 151 | 1.517  | 10.166 | 23.743 |
| ATOM | 2517 | CB   | ASN | A | 151 | 2.542  | 9.330  | 25.417 |
| ATOM | 2518 | HB2  | ASN | A | 151 | 3.379  | 8.787  | 24.979 |
| ATOM | 2519 | HB3  | ASN | A | 151 | 2.875  | 9.678  | 26.392 |
| ATOM | 2520 | CG   | ASN | A | 151 | 1.386  | 8.341  | 25.594 |
| ATOM | 2521 | OD1  | ASN | A | 151 | 0.281  | 8.697  | 25.976 |
| ATOM | 2522 | ND2  | ASN | A | 151 | 1.583  | 7.074  | 25.295 |
| ATOM | 2523 | HD21 | ASN | A | 151 | 0.816  | 6.428  | 25.377 |
| ATOM | 2524 | HD22 | ASN | A | 151 | 2.514  | 6.726  | 25.092 |
| ATOM | 2525 | C    | ASN | A | 151 | 1.467  | 11.674 | 25.262 |
| ATOM | 2526 | O    | ASN | A | 151 | 2.043  | 12.737 | 25.515 |
| ATOM | 2527 | N    | THR | A | 152 | 0.213  | 11.444 | 25.677 |
| ATOM | 2528 | H    | THR | A | 152 | -0.197 | 10.545 | 25.449 |
| ATOM | 2529 | CA   | THR | A | 152 | -0.622 | 12.319 | 26.529 |
| ATOM | 2530 | HA   | THR | A | 152 | -0.874 | 13.232 | 25.991 |
| ATOM | 2531 | CB   | THR | A | 152 | -1.919 | 11.564 | 26.859 |
| ATOM | 2532 | HB   | THR | A | 152 | -1.687 | 10.695 | 27.477 |
| ATOM | 2533 | CG2  | THR | A | 152 | -2.951 | 12.417 | 27.594 |
| ATOM | 2534 | HG21 | THR | A | 152 | -3.911 | 11.898 | 27.617 |
| ATOM | 2535 | HG22 | THR | A | 152 | -2.626 | 12.590 | 28.621 |
| ATOM | 2536 | HG23 | THR | A | 152 | -3.072 | 13.375 | 27.095 |
| ATOM | 2537 | OG1  | THR | A | 152 | -2.494 | 11.102 | 25.663 |
| ATOM | 2538 | HG1  | THR | A | 152 | -2.768 | 11.880 | 25.130 |
| ATOM | 2539 | C    | THR | A | 152 | 0.079  | 12.729 | 27.827 |
| ATOM | 2540 | O    | THR | A | 152 | -0.161 | 13.817 | 28.346 |
| ATOM | 2541 | N    | THR | A | 153 | 0.977  | 11.870 | 28.320 |
| ATOM | 2542 | H    | THR | A | 153 | 1.095  | 10.990 | 27.840 |
| ATOM | 2543 | CA   | THR | A | 153 | 1.785  | 12.020 | 29.536 |
| ATOM | 2544 | HA   | THR | A | 153 | 1.173  | 12.482 | 30.306 |
| ATOM | 2545 | CB   | THR | A | 153 | 2.217  | 10.628 | 30.010 |
| ATOM | 2546 | HB   | THR | A | 153 | 2.933  | 10.731 | 30.826 |
| ATOM | 2547 | CG2  | THR | A | 153 | 1.034  | 9.792  | 30.496 |
| ATOM | 2548 | HG21 | THR | A | 153 | 1.395  | 8.829  | 30.856 |
| ATOM | 2549 | HG22 | THR | A | 153 | 0.542  | 10.314 | 31.316 |
| ATOM | 2550 | HG23 | THR | A | 153 | 0.322  | 9.625  | 29.689 |
| ATOM | 2551 | OG1  | THR | A | 153 | 2.822  | 9.962  | 28.924 |
| ATOM | 2552 | HG1  | THR | A | 153 | 3.464  | 9.321  | 29.287 |
| ATOM | 2553 | C    | THR | A | 153 | 3.034  | 12.890 | 29.384 |
| ATOM | 2554 | O    | THR | A | 153 | 3.768  | 13.039 | 30.361 |
| ATOM | 2555 | N    | CYS | A | 154 | 3.308  | 13.398 | 28.177 |
| ATOM | 2556 | H    | CYS | A | 154 | 2.613  | 13.257 | 27.456 |
| ATOM | 2557 | CA   | CYS | A | 154 | 4.540  | 14.093 | 27.757 |
| ATOM | 2558 | HA   | CYS | A | 154 | 4.369  | 14.437 | 26.739 |
| ATOM | 2559 | CB   | CYS | A | 154 | 4.810  | 15.346 | 28.609 |

|      |      |      |     |   |     |        |        |        |
|------|------|------|-----|---|-----|--------|--------|--------|
| ATOM | 2560 | HB2  | CYS | A | 154 | 4.866  | 15.084 | 29.664 |
| ATOM | 2561 | HB3  | CYS | A | 154 | 5.774  | 15.763 | 28.312 |
| ATOM | 2562 | SG   | CYS | A | 154 | 3.520  | 16.597 | 28.335 |
| ATOM | 2563 | HG   | CYS | A | 154 | 4.105  | 17.597 | 29.021 |
| ATOM | 2564 | C    | CYS | A | 154 | 5.775  | 13.169 | 27.646 |
| ATOM | 2565 | O    | CYS | A | 154 | 6.899  | 13.646 | 27.466 |
| ATOM | 2566 | N    | ASP | A | 155 | 5.578  | 11.850 | 27.716 |
| ATOM | 2567 | H    | ASP | A | 155 | 4.648  | 11.521 | 27.925 |
| ATOM | 2568 | CA   | ASP | A | 155 | 6.613  | 10.858 | 27.412 |
| ATOM | 2569 | HA   | ASP | A | 155 | 7.505  | 11.098 | 27.988 |
| ATOM | 2570 | CB   | ASP | A | 155 | 6.160  | 9.451  | 27.835 |
| ATOM | 2571 | HB2  | ASP | A | 155 | 5.247  | 9.191  | 27.297 |
| ATOM | 2572 | HB3  | ASP | A | 155 | 6.932  | 8.734  | 27.554 |
| ATOM | 2573 | CG   | ASP | A | 155 | 5.916  | 9.324  | 29.344 |
| ATOM | 2574 | OD1  | ASP | A | 155 | 6.615  | 9.995  | 30.132 |
| ATOM | 2575 | OD2  | ASP | A | 155 | 5.006  | 8.553  | 29.735 |
| ATOM | 2576 | C    | ASP | A | 155 | 6.988  | 10.924 | 25.924 |
| ATOM | 2577 | O    | ASP | A | 155 | 6.158  | 10.656 | 25.052 |
| ATOM | 2578 | N    | LEU | A | 156 | 8.232  | 11.333 | 25.655 |
| ATOM | 2579 | H    | LEU | A | 156 | 8.824  | 11.552 | 26.449 |
| ATOM | 2580 | CA   | LEU | A | 156 | 8.783  | 11.605 | 24.325 |
| ATOM | 2581 | HA   | LEU | A | 156 | 7.983  | 11.559 | 23.589 |
| ATOM | 2582 | CB   | LEU | A | 156 | 9.350  | 13.040 | 24.358 |
| ATOM | 2583 | HB2  | LEU | A | 156 | 8.553  | 13.723 | 24.655 |
| ATOM | 2584 | HB3  | LEU | A | 156 | 10.120 | 13.089 | 25.128 |
| ATOM | 2585 | CG   | LEU | A | 156 | 9.965  | 13.557 | 23.044 |
| ATOM | 2586 | HG   | LEU | A | 156 | 10.801 | 12.915 | 22.762 |
| ATOM | 2587 | CD1  | LEU | A | 156 | 8.949  | 13.576 | 21.894 |
| ATOM | 2588 | HD11 | LEU | A | 156 | 8.690  | 12.557 | 21.608 |
| ATOM | 2589 | HD12 | LEU | A | 156 | 8.050  | 14.110 | 22.194 |
| ATOM | 2590 | HD13 | LEU | A | 156 | 9.377  | 14.079 | 21.029 |
| ATOM | 2591 | CD2  | LEU | A | 156 | 10.512 | 14.975 | 23.275 |
| ATOM | 2592 | HD21 | LEU | A | 156 | 11.013 | 15.332 | 22.374 |
| ATOM | 2593 | HD22 | LEU | A | 156 | 9.695  | 15.656 | 23.524 |
| ATOM | 2594 | HD23 | LEU | A | 156 | 11.233 | 14.966 | 24.093 |
| ATOM | 2595 | C    | LEU | A | 156 | 9.851  | 10.556 | 23.981 |
| ATOM | 2596 | O    | LEU | A | 156 | 10.870 | 10.473 | 24.667 |
| ATOM | 2597 | N    | LYS | A | 157 | 9.618  | 9.727  | 22.960 |
| ATOM | 2598 | H    | LYS | A | 157 | 8.766  | 9.872  | 22.425 |
| ATOM | 2599 | CA   | LYS | A | 157 | 10.400 | 8.513  | 22.685 |
| ATOM | 2600 | HA   | LYS | A | 157 | 11.263 | 8.497  | 23.350 |
| ATOM | 2601 | CB   | LYS | A | 157 | 9.544  | 7.267  | 22.985 |
| ATOM | 2602 | HB2  | LYS | A | 157 | 8.708  | 7.241  | 22.284 |
| ATOM | 2603 | HB3  | LYS | A | 157 | 10.161 | 6.382  | 22.818 |
| ATOM | 2604 | CG   | LYS | A | 157 | 8.995  | 7.218  | 24.421 |
| ATOM | 2605 | HG2  | LYS | A | 157 | 9.814  | 7.328  | 25.134 |
| ATOM | 2606 | HG3  | LYS | A | 157 | 8.274  | 8.023  | 24.576 |
| ATOM | 2607 | CD   | LYS | A | 157 | 8.308  | 5.870  | 24.663 |
| ATOM | 2608 | HD2  | LYS | A | 157 | 7.576  | 5.687  | 23.875 |
| ATOM | 2609 | HD3  | LYS | A | 157 | 9.065  | 5.086  | 24.626 |
| ATOM | 2610 | CE   | LYS | A | 157 | 7.607  | 5.827  | 26.024 |
| ATOM | 2611 | HE2  | LYS | A | 157 | 8.347  | 6.016  | 26.806 |
| ATOM | 2612 | HE3  | LYS | A | 157 | 6.843  | 6.610  | 26.068 |
| ATOM | 2613 | NZ   | LYS | A | 157 | 6.988  | 4.499  | 26.236 |
| ATOM | 2614 | HZ1  | LYS | A | 157 | 7.692  | 3.766  | 26.206 |
| ATOM | 2615 | HZ2  | LYS | A | 157 | 6.482  | 4.434  | 27.110 |
| ATOM | 2616 | HZ3  | LYS | A | 157 | 6.333  | 4.286  | 25.492 |



|      |      |      |     |   |     |        |       |        |
|------|------|------|-----|---|-----|--------|-------|--------|
| ATOM | 2617 | C    | LYS | A | 157 | 10.936 | 8.441 | 21.245 |
| ATOM | 2618 | O    | LYS | A | 157 | 10.269 | 8.838 | 20.285 |
| ATOM | 2619 | N    | ILE | A | 158 | 12.135 | 7.872 | 21.078 |
| ATOM | 2620 | H    | ILE | A | 158 | 12.619 | 7.554 | 21.911 |
| ATOM | 2621 | CA   | ILE | A | 158 | 12.777 | 7.658 | 19.765 |
| ATOM | 2622 | HA   | ILE | A | 158 | 12.571 | 8.526 | 19.137 |
| ATOM | 2623 | CB   | ILE | A | 158 | 14.319 | 7.569 | 19.915 |
| ATOM | 2624 | HB   | ILE | A | 158 | 14.558 | 6.725 | 20.563 |
| ATOM | 2625 | CG2  | ILE | A | 158 | 14.987 | 7.336 | 18.543 |
| ATOM | 2626 | HG21 | ILE | A | 158 | 14.714 | 8.135 | 17.851 |
| ATOM | 2627 | HG22 | ILE | A | 158 | 16.070 | 7.311 | 18.638 |
| ATOM | 2628 | HG23 | ILE | A | 158 | 14.684 | 6.375 | 18.127 |
| ATOM | 2629 | CG1  | ILE | A | 158 | 14.857 | 8.872 | 20.565 |
| ATOM | 2630 | HG12 | ILE | A | 158 | 14.611 | 9.718 | 19.925 |
| ATOM | 2631 | HG13 | ILE | A | 158 | 14.363 | 9.027 | 21.523 |
| ATOM | 2632 | CD1  | ILE | A | 158 | 16.359 | 8.883 | 20.840 |
| ATOM | 2633 | HD11 | ILE | A | 158 | 16.919 | 8.937 | 19.910 |
| ATOM | 2634 | HD12 | ILE | A | 158 | 16.603 | 9.758 | 21.436 |
| ATOM | 2635 | HD13 | ILE | A | 158 | 16.635 | 7.986 | 21.390 |
| ATOM | 2636 | C    | ILE | A | 158 | 12.133 | 6.458 | 19.033 |
| ATOM | 2637 | O    | ILE | A | 158 | 11.721 | 5.479 | 19.665 |
| ATOM | 2638 | N    | CYS | C | 159 | 12.055 | 6.558 | 17.699 |
| ATOM | 2639 | H    | CYS | C | 159 | 12.527 | 7.337 | 17.256 |
| ATOM | 2640 | CA   | CYS | C | 159 | 11.403 | 5.646 | 16.749 |
| ATOM | 2641 | HA   | CYS | C | 159 | 11.477 | 4.621 | 17.120 |
| ATOM | 2642 | CB   | CYS | C | 159 | 9.917  | 6.055 | 16.671 |
| ATOM | 2643 | HB2  | CYS | C | 159 | 9.532  | 6.217 | 17.681 |
| ATOM | 2644 | HB3  | CYS | C | 159 | 9.832  | 6.994 | 16.119 |
| ATOM | 2645 | SG   | CYS | C | 159 | 8.901  | 4.780 | 15.858 |
| ATOM | 2646 | HG   | CYS | C | 159 | 7.770  | 5.490 | 15.719 |
| ATOM | 2647 | C    | CYS | C | 159 | 12.121 | 5.717 | 15.368 |
| ATOM | 2648 | O    | CYS | C | 159 | 13.082 | 6.472 | 15.230 |
| ATOM | 2649 | N    | ASP | C | 160 | 11.641 | 4.934 | 14.394 |
| ATOM | 2650 | H    | ASP | C | 160 | 10.787 | 4.446 | 14.632 |
| ATOM | 2651 | CA   | ASP | C | 160 | 12.102 | 4.804 | 13.001 |
| ATOM | 2652 | HA   | ASP | C | 160 | 11.601 | 3.925 | 12.592 |
| ATOM | 2653 | CB   | ASP | C | 160 | 11.642 | 5.989 | 12.136 |
| ATOM | 2654 | HB2  | ASP | C | 160 | 10.584 | 6.149 | 12.341 |
| ATOM | 2655 | HB3  | ASP | C | 160 | 12.176 | 6.890 | 12.445 |
| ATOM | 2656 | CG   | ASP | C | 160 | 11.804 | 5.762 | 10.626 |
| ATOM | 2657 | OD1  | ASP | C | 160 | 12.739 | 5.070 | 10.155 |
| ATOM | 2658 | OD2  | ASP | C | 160 | 10.967 | 6.315 | 9.854  |
| ATOM | 2659 | C    | ASP | C | 160 | 13.608 | 4.548 | 12.876 |
| ATOM | 2660 | O    | ASP | C | 160 | 14.418 | 5.457 | 12.707 |
| ATOM | 2661 | N    | PHE | A | 161 | 13.973 | 3.267 | 12.865 |
| ATOM | 2662 | H    | PHE | A | 161 | 13.258 | 2.566 | 12.989 |
| ATOM | 2663 | CA   | PHE | A | 161 | 15.334 | 2.812 | 12.587 |
| ATOM | 2664 | HA   | PHE | A | 161 | 16.008 | 3.665 | 12.681 |
| ATOM | 2665 | CB   | PHE | A | 161 | 15.740 | 1.792 | 13.667 |
| ATOM | 2666 | HB2  | PHE | A | 161 | 15.000 | 0.989 | 13.708 |
| ATOM | 2667 | HB3  | PHE | A | 161 | 16.698 | 1.346 | 13.397 |
| ATOM | 2668 | CG   | PHE | A | 161 | 15.879 | 2.435 | 15.039 |
| ATOM | 2669 | CD1  | PHE | A | 161 | 14.760 | 2.554 | 15.886 |
| ATOM | 2670 | HD1  | PHE | A | 161 | 13.807 | 2.150 | 15.578 |
| ATOM | 2671 | CE1  | PHE | A | 161 | 14.874 | 3.215 | 17.121 |
| ATOM | 2672 | HE1  | PHE | A | 161 | 14.010 | 3.315 | 17.761 |
| ATOM | 2673 | CZ   | PHE | A | 161 | 16.108 | 3.757 | 17.517 |

|      |      |      |     |   |     |        |        |        |
|------|------|------|-----|---|-----|--------|--------|--------|
| ATOM | 2674 | HZ   | PHE | A | 161 | 16.193 | 4.261  | 18.468 |
| ATOM | 2675 | CE2  | PHE | A | 161 | 17.227 | 3.644  | 16.673 |
| ATOM | 2676 | HE2  | PHE | A | 161 | 18.174 | 4.070  | 16.967 |
| ATOM | 2677 | CD2  | PHE | A | 161 | 17.113 | 2.984  | 15.438 |
| ATOM | 2678 | HD2  | PHE | A | 161 | 17.975 | 2.908  | 14.791 |
| ATOM | 2679 | C    | PHE | A | 161 | 15.478 | 2.312  | 11.134 |
| ATOM | 2680 | O    | PHE | A | 161 | 16.385 | 1.541  | 10.824 |
| ATOM | 2681 | N    | GLY | C | 162 | 14.594 | 2.750  | 10.221 |
| ATOM | 2682 | H    | GLY | C | 162 | 13.875 | 3.405  | 10.525 |
| ATOM | 2683 | CA   | GLY | C | 162 | 14.525 | 2.276  | 8.831  |
| ATOM | 2684 | HA2  | GLY | C | 162 | 14.675 | 1.199  | 8.817  |
| ATOM | 2685 | HA3  | GLY | C | 162 | 13.542 | 2.513  | 8.433  |
| ATOM | 2686 | C    | GLY | C | 162 | 15.565 | 2.864  | 7.876  |
| ATOM | 2687 | O    | GLY | C | 162 | 15.738 | 2.328  | 6.782  |
| ATOM | 2688 | N    | LEU | C | 163 | 16.269 | 3.928  | 8.282  |
| ATOM | 2689 | H    | LEU | C | 163 | 15.982 | 4.361  | 9.147  |
| ATOM | 2690 | CA   | LEU | C | 163 | 17.501 | 4.408  | 7.630  |
| ATOM | 2691 | HA   | LEU | C | 163 | 17.682 | 3.794  | 6.749  |
| ATOM | 2692 | CB   | LEU | C | 163 | 17.292 | 5.874  | 7.187  |
| ATOM | 2693 | HB2  | LEU | C | 163 | 16.295 | 5.967  | 6.752  |
| ATOM | 2694 | HB3  | LEU | C | 163 | 17.326 | 6.518  | 8.069  |
| ATOM | 2695 | CG   | LEU | C | 163 | 18.310 | 6.395  | 6.145  |
| ATOM | 2696 | HG   | LEU | C | 163 | 19.315 | 6.365  | 6.565  |
| ATOM | 2697 | CD1  | LEU | C | 163 | 18.295 | 5.564  | 4.849  |
| ATOM | 2698 | HD11 | LEU | C | 163 | 18.895 | 6.052  | 4.082  |
| ATOM | 2699 | HD12 | LEU | C | 163 | 18.721 | 4.577  | 5.025  |
| ATOM | 2700 | HD13 | LEU | C | 163 | 17.273 | 5.456  | 4.486  |
| ATOM | 2701 | CD2  | LEU | C | 163 | 17.988 | 7.859  | 5.814  |
| ATOM | 2702 | HD21 | LEU | C | 163 | 18.117 | 8.468  | 6.707  |
| ATOM | 2703 | HD22 | LEU | C | 163 | 18.669 | 8.225  | 5.048  |
| ATOM | 2704 | HD23 | LEU | C | 163 | 16.964 | 7.951  | 5.453  |
| ATOM | 2705 | C    | LEU | C | 163 | 18.744 | 4.236  | 8.527  |
| ATOM | 2706 | O    | LEU | C | 163 | 19.869 | 4.338  | 8.038  |
| ATOM | 2707 | N    | ALA | C | 164 | 18.551 | 3.952  | 9.819  |
| ATOM | 2708 | H    | ALA | C | 164 | 17.611 | 3.790  | 10.133 |
| ATOM | 2709 | CA   | ALA | C | 164 | 19.610 | 3.769  | 10.807 |
| ATOM | 2710 | HA   | ALA | C | 164 | 20.243 | 4.658  | 10.800 |
| ATOM | 2711 | CB   | ALA | C | 164 | 18.961 | 3.655  | 12.193 |
| ATOM | 2712 | HB1  | ALA | C | 164 | 18.319 | 4.519  | 12.376 |
| ATOM | 2713 | HB2  | ALA | C | 164 | 18.373 | 2.740  | 12.251 |
| ATOM | 2714 | HB3  | ALA | C | 164 | 19.731 | 3.627  | 12.964 |
| ATOM | 2715 | C    | ALA | C | 164 | 20.502 | 2.555  | 10.494 |
| ATOM | 2716 | O    | ALA | C | 164 | 20.105 | 1.626  | 9.782  |
| ATOM | 2717 | N    | ARG | A | 165 | 21.716 | 2.552  | 11.053 |
| ATOM | 2718 | H    | ARG | A | 165 | 21.977 | 3.335  | 11.646 |
| ATOM | 2719 | CA   | ARG | A | 165 | 22.682 | 1.463  | 10.871 |
| ATOM | 2720 | HA   | ARG | A | 165 | 22.126 | 0.529  | 10.965 |
| ATOM | 2721 | CB   | ARG | A | 165 | 23.300 | 1.528  | 9.455  |
| ATOM | 2722 | HB2  | ARG | A | 165 | 22.563 | 1.911  | 8.747  |
| ATOM | 2723 | HB3  | ARG | A | 165 | 24.155 | 2.207  | 9.451  |
| ATOM | 2724 | CG   | ARG | A | 165 | 23.736 | 0.137  | 8.976  |
| ATOM | 2725 | HG2  | ARG | A | 165 | 24.542 | -0.232 | 9.611  |
| ATOM | 2726 | HG3  | ARG | A | 165 | 22.886 | -0.544 | 9.055  |
| ATOM | 2727 | CD   | ARG | A | 165 | 24.220 | 0.149  | 7.522  |
| ATOM | 2728 | HD2  | ARG | A | 165 | 23.473 | 0.631  | 6.889  |
| ATOM | 2729 | HD3  | ARG | A | 165 | 25.138 | 0.729  | 7.445  |
| ATOM | 2730 | NE   | ARG | A | 165 | 24.425 | -1.230 | 7.052  |

|      |      |      |     |   |     |        |        |        |
|------|------|------|-----|---|-----|--------|--------|--------|
| ATOM | 2731 | HE   | ARG | A | 165 | 23.598 | -1.760 | 6.827  |
| ATOM | 2732 | CZ   | ARG | A | 165 | 25.570 | -1.877 | 6.896  |
| ATOM | 2733 | NH1  | ARG | A | 165 | 26.745 | -1.340 | 7.127  |
| ATOM | 2734 | HH11 | ARG | A | 165 | 26.827 | -0.367 | 7.417  |
| ATOM | 2735 | HH12 | ARG | A | 165 | 27.596 | -1.838 | 6.895  |
| ATOM | 2736 | NH2  | ARG | A | 165 | 25.510 | -3.129 | 6.513  |
| ATOM | 2737 | HH21 | ARG | A | 165 | 24.605 | -3.554 | 6.344  |
| ATOM | 2738 | HH22 | ARG | A | 165 | 26.331 | -3.717 | 6.532  |
| ATOM | 2739 | C    | ARG | A | 165 | 23.758 | 1.483  | 11.958 |
| ATOM | 2740 | O    | ARG | A | 165 | 24.162 | 2.553  | 12.406 |
| ATOM | 2741 | N    | VAL | A | 166 | 24.222 | 0.301  | 12.359 |
| ATOM | 2742 | H    | VAL | A | 166 | 23.855 | -0.515 | 11.904 |
| ATOM | 2743 | CA   | VAL | A | 166 | 25.408 | 0.137  | 13.215 |
| ATOM | 2744 | HA   | VAL | A | 166 | 25.311 | 0.835  | 14.041 |
| ATOM | 2745 | CB   | VAL | A | 166 | 25.476 | -1.289 | 13.819 |
| ATOM | 2746 | HB   | VAL | A | 166 | 24.457 | -1.576 | 14.088 |
| ATOM | 2747 | CG1  | VAL | A | 166 | 25.986 | -2.354 | 12.830 |
| ATOM | 2748 | HG11 | VAL | A | 166 | 25.388 | -2.334 | 11.919 |
| ATOM | 2749 | HG12 | VAL | A | 166 | 27.033 | -2.178 | 12.580 |
| ATOM | 2750 | HG13 | VAL | A | 166 | 25.905 | -3.342 | 13.279 |
| ATOM | 2751 | CG2  | VAL | A | 166 | 26.301 | -1.306 | 15.114 |
| ATOM | 2752 | HG21 | VAL | A | 166 | 27.316 | -0.960 | 14.925 |
| ATOM | 2753 | HG22 | VAL | A | 166 | 25.836 | -0.656 | 15.855 |
| ATOM | 2754 | HG23 | VAL | A | 166 | 26.337 | -2.318 | 15.516 |
| ATOM | 2755 | C    | VAL | A | 166 | 26.667 | 0.497  | 12.414 |
| ATOM | 2756 | O    | VAL | A | 166 | 26.728 | 0.205  | 11.219 |
| ATOM | 2757 | N    | ALA | A | 167 | 27.662 | 1.114  | 13.057 |
| ATOM | 2758 | H    | ALA | A | 167 | 27.534 | 1.354  | 14.038 |
| ATOM | 2759 | CA   | ALA | A | 167 | 28.942 | 1.456  | 12.428 |
| ATOM | 2760 | HA   | ALA | A | 167 | 29.190 | 0.674  | 11.706 |
| ATOM | 2761 | CB   | ALA | A | 167 | 28.789 | 2.778  | 11.659 |
| ATOM | 2762 | HB1  | ALA | A | 167 | 29.725 | 3.029  | 11.161 |
| ATOM | 2763 | HB2  | ALA | A | 167 | 28.016 | 2.673  | 10.897 |
| ATOM | 2764 | HB3  | ALA | A | 167 | 28.511 | 3.585  | 12.337 |
| ATOM | 2765 | C    | ALA | A | 167 | 30.076 | 1.500  | 13.464 |
| ATOM | 2766 | O    | ALA | A | 167 | 29.898 | 2.022  | 14.566 |
| ATOM | 2767 | N    | ASP | A | 168 | 31.239 | 0.957  | 13.090 |
| ATOM | 2768 | H    | ASP | A | 168 | 31.291 | 0.633  | 12.126 |
| ATOM | 2769 | CA   | ASP | A | 168 | 32.285 | 0.452  | 13.993 |
| ATOM | 2770 | HA   | ASP | A | 168 | 31.888 | -0.460 | 14.435 |
| ATOM | 2771 | CB   | ASP | A | 168 | 33.489 | 0.038  | 13.137 |
| ATOM | 2772 | HB2  | ASP | A | 168 | 33.158 | -0.623 | 12.335 |
| ATOM | 2773 | HB3  | ASP | A | 168 | 33.915 | 0.932  | 12.684 |
| ATOM | 2774 | CG   | ASP | A | 168 | 34.561 | -0.686 | 13.954 |
| ATOM | 2775 | OD1  | ASP | A | 168 | 34.561 | -1.936 | 13.962 |
| ATOM | 2776 | OD2  | ASP | A | 168 | 35.378 | 0.001  | 14.601 |
| ATOM | 2777 | C    | ASP | A | 168 | 32.741 | 1.425  | 15.114 |
| ATOM | 2778 | O    | ASP | A | 168 | 32.879 | 2.624  | 14.839 |
| ATOM | 2779 | N    | PRO | A | 169 | 33.039 | 0.929  | 16.338 |
| ATOM | 2780 | CD   | PRO | A | 169 | 32.737 | -0.427 | 16.793 |
| ATOM | 2781 | HD2  | PRO | A | 169 | 33.495 | -1.119 | 16.423 |
| ATOM | 2782 | HD3  | PRO | A | 169 | 31.740 | -0.744 | 16.482 |
| ATOM | 2783 | CG   | PRO | A | 169 | 32.790 | -0.389 | 18.315 |
| ATOM | 2784 | HG2  | PRO | A | 169 | 33.096 | -1.348 | 18.732 |
| ATOM | 2785 | HG3  | PRO | A | 169 | 31.822 | -0.082 | 18.711 |
| ATOM | 2786 | CB   | PRO | A | 169 | 33.823 | 0.696  | 18.573 |
| ATOM | 2787 | HB2  | PRO | A | 169 | 34.820 | 0.274  | 18.444 |

|      |      |     |     |   |     |        |        |        |
|------|------|-----|-----|---|-----|--------|--------|--------|
| ATOM | 2788 | HB3 | PRO | A | 169 | 33.714 | 1.126  | 19.569 |
| ATOM | 2789 | CA  | PRO | A | 169 | 33.541 | 1.716  | 17.467 |
| ATOM | 2790 | HA  | PRO | A | 169 | 32.729 | 2.362  | 17.794 |
| ATOM | 2791 | C   | PRO | A | 169 | 34.794 | 2.583  | 17.247 |
| ATOM | 2792 | O   | PRO | A | 169 | 34.925 | 3.594  | 17.936 |
| ATOM | 2793 | N   | ASP | A | 170 | 35.721 | 2.227  | 16.347 |
| ATOM | 2794 | H   | ASP | A | 170 | 35.585 | 1.362  | 15.822 |
| ATOM | 2795 | CA  | ASP | A | 170 | 36.991 | 2.958  | 16.140 |
| ATOM | 2796 | HA  | ASP | A | 170 | 36.875 | 3.974  | 16.508 |
| ATOM | 2797 | CB  | ASP | A | 170 | 38.105 | 2.318  | 16.983 |
| ATOM | 2798 | HB2 | ASP | A | 170 | 37.671 | 1.829  | 17.856 |
| ATOM | 2799 | HB3 | ASP | A | 170 | 38.624 | 1.551  | 16.408 |
| ATOM | 2800 | CG  | ASP | A | 170 | 39.096 | 3.374  | 17.484 |
| ATOM | 2801 | OD1 | ASP | A | 170 | 38.914 | 3.830  | 18.634 |
| ATOM | 2802 | OD2 | ASP | A | 170 | 40.029 | 3.760  | 16.743 |
| ATOM | 2803 | C   | ASP | A | 170 | 37.436 | 3.077  | 14.669 |
| ATOM | 2804 | O   | ASP | A | 170 | 38.026 | 4.086  | 14.289 |
| ATOM | 2805 | N   | HIE | A | 171 | 37.119 | 2.102  | 13.815 |
| ATOM | 2806 | H   | HIE | A | 171 | 36.567 | 1.323  | 14.176 |
| ATOM | 2807 | CA  | HIE | A | 171 | 37.471 | 2.062  | 12.384 |
| ATOM | 2808 | HA  | HIE | A | 171 | 38.558 | 2.126  | 12.296 |
| ATOM | 2809 | CB  | HIE | A | 171 | 37.017 | 0.695  | 11.849 |
| ATOM | 2810 | HB2 | HIE | A | 171 | 37.364 | -0.084 | 12.531 |
| ATOM | 2811 | HB3 | HIE | A | 171 | 35.928 | 0.673  | 11.819 |
| ATOM | 2812 | CG  | HIE | A | 171 | 37.525 | 0.351  | 10.479 |
| ATOM | 2813 | ND1 | HIE | A | 171 | 38.829 | -0.039 | 10.179 |
| ATOM | 2814 | CE1 | HIE | A | 171 | 38.834 | -0.285 | 8.857  |
| ATOM | 2815 | HE1 | HIE | A | 171 | 39.701 | -0.607 | 8.294  |
| ATOM | 2816 | NE2 | HIE | A | 171 | 37.619 | -0.071 | 8.326  |
| ATOM | 2817 | HE2 | HIE | A | 171 | 37.362 | -0.202 | 7.355  |
| ATOM | 2818 | CD2 | HIE | A | 171 | 36.780 | 0.330  | 9.339  |
| ATOM | 2819 | HD2 | HIE | A | 171 | 35.734 | 0.581  | 9.250  |
| ATOM | 2820 | C   | HIE | A | 171 | 36.896 | 3.233  | 11.548 |
| ATOM | 2821 | O   | HIE | A | 171 | 35.886 | 3.848  | 11.904 |
| ATOM | 2822 | N   | ASP | A | 172 | 37.555 | 3.567  | 10.442 |
| ATOM | 2823 | H   | ASP | A | 172 | 38.354 | 3.001  | 10.193 |
| ATOM | 2824 | CA  | ASP | A | 172 | 37.146 | 4.631  | 9.512  |
| ATOM | 2825 | HA  | ASP | A | 172 | 36.828 | 5.513  | 10.086 |
| ATOM | 2826 | CB  | ASP | A | 172 | 38.374 | 5.026  | 8.678  |
| ATOM | 2827 | HB2 | ASP | A | 172 | 39.178 | 5.350  | 9.344  |
| ATOM | 2828 | HB3 | ASP | A | 172 | 38.734 | 4.166  | 8.115  |
| ATOM | 2829 | CG  | ASP | A | 172 | 38.037 | 6.143  | 7.700  |
| ATOM | 2830 | OD1 | ASP | A | 172 | 38.076 | 7.325  | 8.112  |
| ATOM | 2831 | OD2 | ASP | A | 172 | 37.680 | 5.858  | 6.537  |
| ATOM | 2832 | C   | ASP | A | 172 | 35.984 | 4.177  | 8.595  |
| ATOM | 2833 | O   | ASP | A | 172 | 36.005 | 3.076  | 8.049  |
| ATOM | 2834 | N   | HIE | A | 173 | 34.968 | 5.027  | 8.409  |
| ATOM | 2835 | H   | HIE | A | 173 | 34.998 | 5.930  | 8.863  |
| ATOM | 2836 | CA  | HIE | A | 173 | 33.747 | 4.690  | 7.659  |
| ATOM | 2837 | HA  | HIE | A | 173 | 33.680 | 3.604  | 7.586  |
| ATOM | 2838 | CB  | HIE | A | 173 | 32.528 | 5.194  | 8.454  |
| ATOM | 2839 | HB2 | HIE | A | 173 | 32.534 | 6.290  | 8.458  |
| ATOM | 2840 | HB3 | HIE | A | 173 | 31.623 | 4.847  | 7.947  |
| ATOM | 2841 | CG  | HIE | A | 173 | 32.463 | 4.706  | 9.882  |
| ATOM | 2842 | ND1 | HIE | A | 173 | 32.155 | 5.508  | 10.983 |
| ATOM | 2843 | CE1 | HIE | A | 173 | 32.137 | 4.691  | 12.045 |
| ATOM | 2844 | HE1 | HIE | A | 173 | 31.889 | 5.001  | 13.051 |

|      |      |      |     |   |     |        |        |        |
|------|------|------|-----|---|-----|--------|--------|--------|
| ATOM | 2845 | NE2  | HIE | A | 173 | 32.460 | 3.440  | 11.679 |
| ATOM | 2846 | HE2  | HIE | A | 173 | 32.486 | 2.637  | 12.298 |
| ATOM | 2847 | CD2  | HIE | A | 173 | 32.665 | 3.427  | 10.316 |
| ATOM | 2848 | HD2  | HIE | A | 173 | 32.906 | 2.569  | 9.701  |
| ATOM | 2849 | C    | HIE | A | 173 | 33.725 | 5.225  | 6.209  |
| ATOM | 2850 | O    | HIE | A | 173 | 32.747 | 5.003  | 5.487  |
| ATOM | 2851 | N    | THR | A | 174 | 34.780 | 5.944  | 5.785  |
| ATOM | 2852 | H    | THR | A | 174 | 35.579 | 6.005  | 6.404  |
| ATOM | 2853 | CA   | THR | A | 174 | 34.874 | 6.633  | 4.482  |
| ATOM | 2854 | HA   | THR | A | 174 | 34.062 | 7.349  | 4.402  |
| ATOM | 2855 | CB   | THR | A | 174 | 36.193 | 7.397  | 4.327  |
| ATOM | 2856 | HB   | THR | A | 174 | 36.978 | 6.699  | 4.045  |
| ATOM | 2857 | CG2  | THR | A | 174 | 36.111 | 8.497  | 3.282  |
| ATOM | 2858 | HG21 | THR | A | 174 | 37.065 | 9.022  | 3.226  |
| ATOM | 2859 | HG22 | THR | A | 174 | 35.888 | 8.068  | 2.306  |
| ATOM | 2860 | HG23 | THR | A | 174 | 35.329 | 9.199  | 3.568  |
| ATOM | 2861 | OG1  | THR | A | 174 | 36.545 | 8.012  | 5.537  |
| ATOM | 2862 | HG1  | THR | A | 174 | 37.071 | 7.333  | 6.010  |
| ATOM | 2863 | C    | THR | A | 174 | 34.730 | 5.638  | 3.345  |
| ATOM | 2864 | O    | THR | A | 174 | 35.412 | 4.612  | 3.351  |
| ATOM | 2865 | N    | GLY | A | 175 | 33.856 | 5.950  | 2.386  |
| ATOM | 2866 | H    | GLY | A | 175 | 33.424 | 6.868  | 2.417  |
| ATOM | 2867 | CA   | GLY | A | 175 | 33.584 | 5.113  | 1.213  |
| ATOM | 2868 | HA2  | GLY | A | 175 | 33.106 | 5.730  | 0.451  |
| ATOM | 2869 | HA3  | GLY | A | 175 | 34.530 | 4.725  | 0.826  |
| ATOM | 2870 | C    | GLY | A | 175 | 32.671 | 3.904  | 1.467  |
| ATOM | 2871 | O    | GLY | A | 175 | 32.533 | 3.096  | 0.551  |
| ATOM | 2872 | N    | PHE | A | 176 | 32.064 | 3.750  | 2.657  |
| ATOM | 2873 | H    | PHE | A | 176 | 32.263 | 4.422  | 3.388  |
| ATOM | 2874 | CA   | PHE | A | 176 | 31.259 | 2.564  | 3.008  |
| ATOM | 2875 | HA   | PHE | A | 176 | 31.194 | 1.903  | 2.143  |
| ATOM | 2876 | CB   | PHE | A | 176 | 31.971 | 1.782  | 4.122  |
| ATOM | 2877 | HB2  | PHE | A | 176 | 32.175 | 2.443  | 4.965  |
| ATOM | 2878 | HB3  | PHE | A | 176 | 31.290 | 1.010  | 4.476  |
| ATOM | 2879 | CG   | PHE | A | 176 | 33.247 | 1.095  | 3.679  |
| ATOM | 2880 | CD1  | PHE | A | 176 | 33.176 | -0.039 | 2.846  |
| ATOM | 2881 | HD1  | PHE | A | 176 | 32.215 | -0.415 | 2.521  |
| ATOM | 2882 | CE1  | PHE | A | 176 | 34.353 | -0.679 | 2.423  |
| ATOM | 2883 | HE1  | PHE | A | 176 | 34.294 | -1.547 | 1.778  |
| ATOM | 2884 | CZ   | PHE | A | 176 | 35.605 | -0.185 | 2.828  |
| ATOM | 2885 | HZ   | PHE | A | 176 | 36.510 | -0.668 | 2.483  |
| ATOM | 2886 | CE2  | PHE | A | 176 | 35.680 | 0.936  | 3.673  |
| ATOM | 2887 | HE2  | PHE | A | 176 | 36.643 | 1.310  | 3.996  |
| ATOM | 2888 | CD2  | PHE | A | 176 | 34.502 | 1.579  | 4.095  |
| ATOM | 2889 | HD2  | PHE | A | 176 | 34.564 | 2.449  | 4.732  |
| ATOM | 2890 | C    | PHE | A | 176 | 29.799 | 2.830  | 3.421  |
| ATOM | 2891 | O    | PHE | A | 176 | 28.974 | 1.925  | 3.280  |
| ATOM | 2892 | N    | LEU | A | 177 | 29.452 | 4.021  | 3.923  |
| ATOM | 2893 | H    | LEU | A | 177 | 30.150 | 4.745  | 4.011  |
| ATOM | 2894 | CA   | LEU | A | 177 | 28.060 | 4.357  | 4.257  |
| ATOM | 2895 | HA   | LEU | A | 177 | 27.580 | 3.478  | 4.688  |
| ATOM | 2896 | CB   | LEU | A | 177 | 28.012 | 5.497  | 5.292  |
| ATOM | 2897 | HB2  | LEU | A | 177 | 28.705 | 6.275  | 4.980  |
| ATOM | 2898 | HB3  | LEU | A | 177 | 27.015 | 5.940  | 5.291  |
| ATOM | 2899 | CG   | LEU | A | 177 | 28.346 | 5.025  | 6.722  |
| ATOM | 2900 | HG   | LEU | A | 177 | 29.117 | 4.253  | 6.685  |
| ATOM | 2901 | CD1  | LEU | A | 177 | 28.879 | 6.192  | 7.560  |

|      |      |         |     |     |        |        |        |        |
|------|------|---------|-----|-----|--------|--------|--------|--------|
| ATOM | 2902 | HD11LEU | A   | 177 | 29.786 | 6.591  | 7.105  |        |
| ATOM | 2903 | HD12LEU | A   | 177 | 28.132 | 6.981  | 7.624  |        |
| ATOM | 2904 | HD13LEU | A   | 177 | 29.120 | 5.845  | 8.566  |        |
| ATOM | 2905 | CD2     | LEU | A   | 177    | 27.090 | 4.453  | 7.402  |
| ATOM | 2906 | HD21LEU | A   | 177 | 26.669 | 3.647  | 6.802  |        |
| ATOM | 2907 | HD22LEU | A   | 177 | 27.347 | 4.069  | 8.389  |        |
| ATOM | 2908 | HD23LEU | A   | 177 | 26.336 | 5.232  | 7.516  |        |
| ATOM | 2909 | C       | LEU | A   | 177    | 27.251 | 4.712  | 3.005  |
| ATOM | 2910 | O       | LEU | A   | 177    | 27.754 | 5.340  | 2.070  |
| ATOM | 2911 | N       | THP | A   | 178    | 25.969 | 4.344  | 3.029  |
| ATOM | 2912 | H       | THP | A   | 178    | 25.655 | 3.728  | 3.777  |
| ATOM | 2913 | CA      | THP | A   | 178    | 24.947 | 4.780  | 2.075  |
| ATOM | 2914 | HA      | THP | A   | 178    | 25.268 | 4.432  | 1.089  |
| ATOM | 2915 | CB      | THP | A   | 178    | 23.580 | 4.131  | 2.377  |
| ATOM | 2916 | HB      | THP | A   | 178    | 23.149 | 4.577  | 3.271  |
| ATOM | 2917 | CG2     | THP | A   | 178    | 22.604 | 4.334  | 1.216  |
| ATOM | 2918 | HG21    | THP | A   | 178    | 22.334 | 5.386  | 1.135  |
| ATOM | 2919 | HG22    | THP | A   | 178    | 23.052 | 3.994  | 0.282  |
| ATOM | 2920 | HG23    | THP | A   | 178    | 21.698 | 3.763  | 1.401  |
| ATOM | 2921 | OG1     | THP | A   | 178    | 23.717 | 2.735  | 2.553  |
| ATOM | 2922 | PS      | THP | A   | 178    | 23.609 | 2.052  | 3.994  |
| ATOM | 2923 | OPA     | THP | A   | 178    | 23.839 | 0.630  | 3.687  |
| ATOM | 2924 | OPB     | THP | A   | 178    | 24.649 | 2.689  | 4.807  |
| ATOM | 2925 | OPC     | THP | A   | 178    | 22.236 | 2.358  | 4.424  |
| ATOM | 2926 | C       | THP | A   | 178    | 24.860 | 6.314  | 2.044  |
| ATOM | 2927 | O       | THP | A   | 178    | 24.976 | 7.009  | 3.061  |
| ATOM | 2928 | N       | GLU | A   | 179    | 24.705 | 6.801  | 0.820  |
| ATOM | 2929 | H       | GLU | A   | 179    | 24.592 | 6.099  | 0.110  |
| ATOM | 2930 | CA      | GLU | A   | 179    | 24.992 | 8.154  | 0.363  |
| ATOM | 2931 | HA      | GLU | A   | 179    | 25.944 | 8.476  | 0.784  |
| ATOM | 2932 | CB      | GLU | A   | 179    | 25.164 | 8.044  | -1.159 |
| ATOM | 2933 | HB2     | GLU | A   | 179    | 25.948 | 7.309  | -1.356 |
| ATOM | 2934 | HB3     | GLU | A   | 179    | 24.235 | 7.674  | -1.601 |
| ATOM | 2935 | CG      | GLU | A   | 179    | 25.553 | 9.351  | -1.849 |
| ATOM | 2936 | HG2     | GLU | A   | 179    | 24.804 | 10.116 | -1.644 |
| ATOM | 2937 | HG3     | GLU | A   | 179    | 26.511 | 9.693  | -1.457 |
| ATOM | 2938 | CD      | GLU | A   | 179    | 25.665 | 9.172  | -3.361 |
| ATOM | 2939 | OE1     | GLU | A   | 179    | 25.793 | 8.027  | -3.853 |
| ATOM | 2940 | OE2     | GLU | A   | 179    | 25.673 | 10.199 | -4.071 |
| ATOM | 2941 | C       | GLU | A   | 179    | 23.918 | 9.173  | 0.776  |
| ATOM | 2942 | O       | GLU | A   | 179    | 24.125 | 9.998  | 1.666  |
| ATOM | 2943 | N       | TYP | A   | 180    | 22.770 | 9.178  | 0.101  |
| ATOM | 2944 | H       | TYP | A   | 180    | 22.609 | 8.469  | -0.596 |
| ATOM | 2945 | CA      | TYP | A   | 180    | 21.801 | 10.272 | 0.199  |
| ATOM | 2946 | HA      | TYP | A   | 180    | 22.358 | 11.204 | 0.316  |
| ATOM | 2947 | CB      | TYP | A   | 180    | 21.039 | 10.388 | -1.130 |
| ATOM | 2948 | HB2     | TYP | A   | 180    | 20.204 | 9.689  | -1.152 |
| ATOM | 2949 | HB3     | TYP | A   | 180    | 21.702 | 10.104 | -1.947 |
| ATOM | 2950 | CG      | TYP | A   | 180    | 20.555 | 11.789 | -1.431 |
| ATOM | 2951 | CD1     | TYP | A   | 180    | 21.463 | 12.762 | -1.885 |
| ATOM | 2952 | HD1     | TYP | A   | 180    | 22.508 | 12.520 | -1.993 |
| ATOM | 2953 | CE1     | TYP | A   | 180    | 21.012 | 14.052 | -2.207 |
| ATOM | 2954 | HE1     | TYP | A   | 180    | 21.702 | 14.792 | -2.591 |
| ATOM | 2955 | CZ      | TYP | A   | 180    | 19.658 | 14.399 | -2.014 |
| ATOM | 2956 | CE2     | TYP | A   | 180    | 18.750 | 13.420 | -1.551 |
| ATOM | 2957 | HE2     | TYP | A   | 180    | 17.708 | 13.661 | -1.411 |
| ATOM | 2958 | CD2     | TYP | A   | 180    | 19.199 | 12.118 | -1.286 |

|      |      |      |     |   |     |        |        |        |
|------|------|------|-----|---|-----|--------|--------|--------|
| ATOM | 2959 | HD2  | TYP | A | 180 | 18.500 | 11.363 | -0.978 |
| ATOM | 2960 | OG   | TYP | A | 180 | 19.307 | 15.666 | -2.270 |
| ATOM | 2961 | PS   | TYP | A | 180 | 17.851 | 16.359 | -2.090 |
| ATOM | 2962 | OPA  | TYP | A | 180 | 18.100 | 17.778 | -2.404 |
| ATOM | 2963 | OPB  | TYP | A | 180 | 16.921 | 15.700 | -3.044 |
| ATOM | 2964 | OPC  | TYP | A | 180 | 17.458 | 16.154 | -0.679 |
| ATOM | 2965 | C    | TYP | A | 180 | 20.911 | 10.112 | 1.447  |
| ATOM | 2966 | O    | TYP | A | 180 | 19.770 | 9.663  | 1.365  |
| ATOM | 2967 | N    | VAL | C | 181 | 21.485 | 10.386 | 2.620  |
| ATOM | 2968 | H    | VAL | C | 181 | 22.477 | 10.613 | 2.568  |
| ATOM | 2969 | CA   | VAL | C | 181 | 20.854 | 10.197 | 3.943  |
| ATOM | 2970 | HA   | VAL | C | 181 | 19.895 | 9.703  | 3.784  |
| ATOM | 2971 | CB   | VAL | C | 181 | 21.674 | 9.260  | 4.855  |
| ATOM | 2972 | HB   | VAL | C | 181 | 21.117 | 9.132  | 5.784  |
| ATOM | 2973 | CG1  | VAL | C | 181 | 21.784 | 7.872  | 4.207  |
| ATOM | 2974 | HG11 | VAL | C | 181 | 22.219 | 7.176  | 4.917  |
| ATOM | 2975 | HG12 | VAL | C | 181 | 20.794 | 7.512  | 3.928  |
| ATOM | 2976 | HG13 | VAL | C | 181 | 22.410 | 7.917  | 3.316  |
| ATOM | 2977 | CG2  | VAL | C | 181 | 23.071 | 9.787  | 5.228  |
| ATOM | 2978 | HG21 | VAL | C | 181 | 23.675 | 9.929  | 4.333  |
| ATOM | 2979 | HG22 | VAL | C | 181 | 22.986 | 10.737 | 5.757  |
| ATOM | 2980 | HG23 | VAL | C | 181 | 23.571 | 9.071  | 5.882  |
| ATOM | 2981 | C    | VAL | C | 181 | 20.541 | 11.517 | 4.659  |
| ATOM | 2982 | O    | VAL | C | 181 | 21.173 | 12.539 | 4.400  |
| ATOM | 2983 | N    | ALA | C | 182 | 19.540 | 11.455 | 5.549  |
| ATOM | 2984 | H    | ALA | C | 182 | 19.168 | 10.536 | 5.734  |
| ATOM | 2985 | CA   | ALA | C | 182 | 18.904 | 12.546 | 6.300  |
| ATOM | 2986 | HA   | ALA | C | 182 | 18.252 | 12.071 | 7.038  |
| ATOM | 2987 | CB   | ALA | C | 182 | 19.934 | 13.362 | 7.100  |
| ATOM | 2988 | HB1  | ALA | C | 182 | 20.569 | 13.935 | 6.432  |
| ATOM | 2989 | HB2  | ALA | C | 182 | 19.413 | 14.051 | 7.766  |
| ATOM | 2990 | HB3  | ALA | C | 182 | 20.552 | 12.695 | 7.702  |
| ATOM | 2991 | C    | ALA | C | 182 | 18.003 | 13.434 | 5.416  |
| ATOM | 2992 | O    | ALA | C | 182 | 18.375 | 13.836 | 4.307  |
| ATOM | 2993 | N    | THR | C | 183 | 16.811 | 13.753 | 5.936  |
| ATOM | 2994 | H    | THR | C | 183 | 16.579 | 13.354 | 6.842  |
| ATOM | 2995 | CA   | THR | C | 183 | 15.807 | 14.638 | 5.324  |
| ATOM | 2996 | HA   | THR | C | 183 | 15.436 | 14.184 | 4.407  |
| ATOM | 2997 | CB   | THR | C | 183 | 14.612 | 14.820 | 6.267  |
| ATOM | 2998 | HB   | THR | C | 183 | 14.952 | 15.200 | 7.232  |
| ATOM | 2999 | CG2  | THR | C | 183 | 13.535 | 15.751 | 5.708  |
| ATOM | 3000 | HG21 | THR | C | 183 | 13.905 | 16.774 | 5.661  |
| ATOM | 3001 | HG22 | THR | C | 183 | 13.240 | 15.422 | 4.711  |
| ATOM | 3002 | HG23 | THR | C | 183 | 12.661 | 15.729 | 6.359  |
| ATOM | 3003 | OG1  | THR | C | 183 | 14.006 | 13.566 | 6.440  |
| ATOM | 3004 | HG1  | THR | C | 183 | 14.573 | 13.032 | 7.039  |
| ATOM | 3005 | C    | THR | C | 183 | 16.448 | 15.972 | 4.980  |
| ATOM | 3006 | O    | THR | C | 183 | 17.169 | 16.538 | 5.800  |
| ATOM | 3007 | N    | ARG | A | 184 | 16.167 | 16.479 | 3.778  |
| ATOM | 3008 | H    | ARG | A | 184 | 15.546 | 15.946 | 3.184  |
| ATOM | 3009 | CA   | ARG | A | 184 | 16.791 | 17.669 | 3.181  |
| ATOM | 3010 | HA   | ARG | A | 184 | 17.779 | 17.387 | 2.815  |
| ATOM | 3011 | CB   | ARG | A | 184 | 15.929 | 18.061 | 1.973  |
| ATOM | 3012 | HB2  | ARG | A | 184 | 15.812 | 17.182 | 1.337  |
| ATOM | 3013 | HB3  | ARG | A | 184 | 14.939 | 18.359 | 2.321  |
| ATOM | 3014 | CG   | ARG | A | 184 | 16.532 | 19.196 | 1.135  |
| ATOM | 3015 | HG2  | ARG | A | 184 | 16.657 | 20.083 | 1.757  |

|      |      |      |     |   |     |        |        |        |
|------|------|------|-----|---|-----|--------|--------|--------|
| ATOM | 3016 | HG3  | ARG | A | 184 | 17.506 | 18.892 | 0.747  |
| ATOM | 3017 | CD   | ARG | A | 184 | 15.603 | 19.553 | -0.028 |
| ATOM | 3018 | HD2  | ARG | A | 184 | 14.609 | 19.779 | 0.363  |
| ATOM | 3019 | HD3  | ARG | A | 184 | 15.992 | 20.451 | -0.495 |
| ATOM | 3020 | NE   | ARG | A | 184 | 15.526 | 18.475 | -1.029 |
| ATOM | 3021 | HE   | ARG | A | 184 | 16.303 | 17.813 | -1.037 |
| ATOM | 3022 | CZ   | ARG | A | 184 | 14.553 | 18.270 | -1.910 |
| ATOM | 3023 | NH1  | ARG | A | 184 | 13.552 | 19.114 | -2.034 |
| ATOM | 3024 | HH11 | ARG | A | 184 | 13.683 | 20.056 | -1.702 |
| ATOM | 3025 | HH12 | ARG | A | 184 | 12.743 | 18.913 | -2.618 |
| ATOM | 3026 | NH2  | ARG | A | 184 | 14.567 | 17.204 | -2.677 |
| ATOM | 3027 | HH21 | ARG | A | 184 | 15.402 | 16.611 | -2.703 |
| ATOM | 3028 | HH22 | ARG | A | 184 | 13.844 | 17.057 | -3.354 |
| ATOM | 3029 | C    | ARG | A | 184 | 16.973 | 18.839 | 4.165  |
| ATOM | 3030 | O    | ARG | A | 184 | 18.073 | 19.370 | 4.309  |
| ATOM | 3031 | N    | TRP | A | 185 | 15.908 | 19.213 | 4.882  |
| ATOM | 3032 | H    | TRP | A | 185 | 15.038 | 18.731 | 4.719  |
| ATOM | 3033 | CA   | TRP | A | 185 | 15.888 | 20.351 | 5.812  |
| ATOM | 3034 | HA   | TRP | A | 185 | 16.421 | 21.173 | 5.344  |
| ATOM | 3035 | CB   | TRP | A | 185 | 14.432 | 20.798 | 5.995  |
| ATOM | 3036 | HB2  | TRP | A | 185 | 13.849 | 19.963 | 6.391  |
| ATOM | 3037 | HB3  | TRP | A | 185 | 14.414 | 21.597 | 6.739  |
| ATOM | 3038 | CG   | TRP | A | 185 | 13.748 | 21.330 | 4.767  |
| ATOM | 3039 | CD1  | TRP | A | 185 | 14.340 | 21.622 | 3.585  |
| ATOM | 3040 | HD1  | TRP | A | 185 | 15.392 | 21.503 | 3.360  |
| ATOM | 3041 | NE1  | TRP | A | 185 | 13.424 | 22.168 | 2.715  |
| ATOM | 3042 | HE1  | TRP | A | 185 | 13.694 | 22.532 | 1.804  |
| ATOM | 3043 | CE2  | TRP | A | 185 | 12.181 | 22.279 | 3.298  |
| ATOM | 3044 | CZ2  | TRP | A | 185 | 10.959 | 22.801 | 2.852  |
| ATOM | 3045 | HZ2  | TRP | A | 185 | 10.876 | 23.222 | 1.861  |
| ATOM | 3046 | CH2  | TRP | A | 185 | 9.851  | 22.782 | 3.715  |
| ATOM | 3047 | HH2  | TRP | A | 185 | 8.905  | 23.192 | 3.388  |
| ATOM | 3048 | CZ3  | TRP | A | 185 | 9.980  | 22.238 | 5.006  |
| ATOM | 3049 | HZ3  | TRP | A | 185 | 9.124  | 22.231 | 5.665  |
| ATOM | 3050 | CE3  | TRP | A | 185 | 11.214 | 21.720 | 5.450  |
| ATOM | 3051 | HE3  | TRP | A | 185 | 11.299 | 21.323 | 6.452  |
| ATOM | 3052 | CD2  | TRP | A | 185 | 12.350 | 21.731 | 4.608  |
| ATOM | 3053 | C    | TRP | A | 185 | 16.596 | 20.112 | 7.163  |
| ATOM | 3054 | O    | TRP | A | 185 | 16.763 | 21.045 | 7.943  |
| ATOM | 3055 | N    | TYR | C | 186 | 17.016 | 18.874 | 7.437  |
| ATOM | 3056 | H    | TYR | C | 186 | 16.843 | 18.154 | 6.745  |
| ATOM | 3057 | CA   | TYR | C | 186 | 17.714 | 18.447 | 8.658  |
| ATOM | 3058 | HA   | TYR | C | 186 | 17.813 | 19.289 | 9.347  |
| ATOM | 3059 | CB   | TYR | C | 186 | 16.858 | 17.361 | 9.339  |
| ATOM | 3060 | HB2  | TYR | C | 186 | 16.226 | 16.860 | 8.604  |
| ATOM | 3061 | HB3  | TYR | C | 186 | 17.517 | 16.597 | 9.754  |
| ATOM | 3062 | CG   | TYR | C | 186 | 15.982 | 17.888 | 10.461 |
| ATOM | 3063 | CD1  | TYR | C | 186 | 14.975 | 18.844 | 10.209 |
| ATOM | 3064 | HD1  | TYR | C | 186 | 14.799 | 19.194 | 9.202  |
| ATOM | 3065 | CE1  | TYR | C | 186 | 14.214 | 19.370 | 11.271 |
| ATOM | 3066 | HE1  | TYR | C | 186 | 13.454 | 20.119 | 11.088 |
| ATOM | 3067 | CZ   | TYR | C | 186 | 14.457 | 18.935 | 12.592 |
| ATOM | 3068 | OH   | TYR | C | 186 | 13.755 | 19.456 | 13.632 |
| ATOM | 3069 | HH   | TYR | C | 186 | 13.036 | 20.065 | 13.347 |
| ATOM | 3070 | CE2  | TYR | C | 186 | 15.434 | 17.944 | 12.835 |
| ATOM | 3071 | HE2  | TYR | C | 186 | 15.612 | 17.597 | 13.839 |
| ATOM | 3072 | CD2  | TYR | C | 186 | 16.196 | 17.428 | 11.774 |



|      |      |      |     |   |     |        |        |        |
|------|------|------|-----|---|-----|--------|--------|--------|
| ATOM | 3073 | HD2  | TYR | C | 186 | 16.958 | 16.688 | 11.971 |
| ATOM | 3074 | C    | TYR | C | 186 | 19.149 | 17.937 | 8.399  |
| ATOM | 3075 | O    | TYR | C | 186 | 19.906 | 17.747 | 9.348  |
| ATOM | 3076 | N    | ARG | C | 187 | 19.539 | 17.718 | 7.136  |
| ATOM | 3077 | H    | ARG | C | 187 | 18.848 | 17.858 | 6.411  |
| ATOM | 3078 | CA   | ARG | C | 187 | 20.837 | 17.146 | 6.744  |
| ATOM | 3079 | HA   | ARG | C | 187 | 20.910 | 16.164 | 7.217  |
| ATOM | 3080 | CB   | ARG | C | 187 | 20.833 | 16.950 | 5.215  |
| ATOM | 3081 | HB2  | ARG | C | 187 | 19.897 | 16.459 | 4.943  |
| ATOM | 3082 | HB3  | ARG | C | 187 | 20.861 | 17.924 | 4.722  |
| ATOM | 3083 | CG   | ARG | C | 187 | 22.001 | 16.089 | 4.703  |
| ATOM | 3084 | HG2  | ARG | C | 187 | 22.937 | 16.607 | 4.904  |
| ATOM | 3085 | HG3  | ARG | C | 187 | 22.018 | 15.145 | 5.239  |
| ATOM | 3086 | CD   | ARG | C | 187 | 21.923 | 15.788 | 3.199  |
| ATOM | 3087 | HD2  | ARG | C | 187 | 21.958 | 16.734 | 2.656  |
| ATOM | 3088 | HD3  | ARG | C | 187 | 22.793 | 15.195 | 2.911  |
| ATOM | 3089 | NE   | ARG | C | 187 | 20.695 | 15.060 | 2.839  |
| ATOM | 3090 | HE   | ARG | C | 187 | 20.156 | 14.635 | 3.586  |
| ATOM | 3091 | CZ   | ARG | C | 187 | 20.199 | 14.954 | 1.615  |
| ATOM | 3092 | NH1  | ARG | C | 187 | 20.895 | 15.262 | 0.549  |
| ATOM | 3093 | HH11 | ARG | C | 187 | 21.901 | 15.358 | 0.613  |
| ATOM | 3094 | HH12 | ARG | C | 187 | 20.491 | 15.054 | -0.367 |
| ATOM | 3095 | NH2  | ARG | C | 187 | 18.973 | 14.530 | 1.445  |
| ATOM | 3096 | HH21 | ARG | C | 187 | 18.432 | 14.239 | 2.244  |
| ATOM | 3097 | HH22 | ARG | C | 187 | 18.571 | 14.595 | 0.511  |
| ATOM | 3098 | C    | ARG | C | 187 | 22.027 | 18.003 | 7.224  |
| ATOM | 3099 | O    | ARG | C | 187 | 22.050 | 19.218 | 7.026  |
| ATOM | 3100 | N    | ALA | A | 188 | 23.025 | 17.365 | 7.843  |
| ATOM | 3101 | H    | ALA | A | 188 | 22.934 | 16.372 | 7.969  |
| ATOM | 3102 | CA   | ALA | A | 188 | 24.267 | 17.995 | 8.304  |
| ATOM | 3103 | HA   | ALA | A | 188 | 24.004 | 18.907 | 8.841  |
| ATOM | 3104 | CB   | ALA | A | 188 | 24.959 | 17.037 | 9.282  |
| ATOM | 3105 | HB1  | ALA | A | 188 | 24.276 | 16.766 | 10.087 |
| ATOM | 3106 | HB2  | ALA | A | 188 | 25.277 | 16.137 | 8.756  |
| ATOM | 3107 | HB3  | ALA | A | 188 | 25.842 | 17.513 | 9.712  |
| ATOM | 3108 | C    | ALA | A | 188 | 25.190 | 18.371 | 7.122  |
| ATOM | 3109 | O    | ALA | A | 188 | 25.256 | 17.605 | 6.155  |
| ATOM | 3110 | N    | PRO | A | 189 | 25.915 | 19.508 | 7.186  |
| ATOM | 3111 | CD   | PRO | A | 189 | 26.058 | 20.379 | 8.344  |
| ATOM | 3112 | HD2  | PRO | A | 189 | 26.281 | 19.815 | 9.251  |
| ATOM | 3113 | HD3  | PRO | A | 189 | 25.144 | 20.960 | 8.467  |
| ATOM | 3114 | CG   | PRO | A | 189 | 27.215 | 21.318 | 8.014  |
| ATOM | 3115 | HG2  | PRO | A | 189 | 28.160 | 20.849 | 8.293  |
| ATOM | 3116 | HG3  | PRO | A | 189 | 27.102 | 22.282 | 8.509  |
| ATOM | 3117 | CB   | PRO | A | 189 | 27.133 | 21.450 | 6.494  |
| ATOM | 3118 | HB2  | PRO | A | 189 | 28.107 | 21.678 | 6.057  |
| ATOM | 3119 | HB3  | PRO | A | 189 | 26.418 | 22.230 | 6.233  |
| ATOM | 3120 | CA   | PRO | A | 189 | 26.587 | 20.095 | 6.027  |
| ATOM | 3121 | HA   | PRO | A | 189 | 25.849 | 20.270 | 5.246  |
| ATOM | 3122 | C    | PRO | A | 189 | 27.691 | 19.216 | 5.439  |
| ATOM | 3123 | O    | PRO | A | 189 | 27.875 | 19.219 | 4.223  |
| ATOM | 3124 | N    | GLU | A | 190 | 28.407 | 18.442 | 6.261  |
| ATOM | 3125 | H    | GLU | A | 190 | 28.247 | 18.465 | 7.269  |
| ATOM | 3126 | CA   | GLU | A | 190 | 29.498 | 17.596 | 5.782  |
| ATOM | 3127 | HA   | GLU | A | 190 | 30.016 | 18.158 | 5.008  |
| ATOM | 3128 | CB   | GLU | A | 190 | 30.526 | 17.350 | 6.899  |
| ATOM | 3129 | HB2  | GLU | A | 190 | 31.457 | 17.044 | 6.419  |

|      |      |      |     |   |     |        |        |        |
|------|------|------|-----|---|-----|--------|--------|--------|
| ATOM | 3130 | HB3  | GLU | A | 190 | 30.726 | 18.286 | 7.424  |
| ATOM | 3131 | CG   | GLU | A | 190 | 30.153 | 16.255 | 7.910  |
| ATOM | 3132 | HG2  | GLU | A | 190 | 29.909 | 15.330 | 7.387  |
| ATOM | 3133 | HG3  | GLU | A | 190 | 31.035 | 16.039 | 8.510  |
| ATOM | 3134 | CD   | GLU | A | 190 | 29.012 | 16.598 | 8.866  |
| ATOM | 3135 | OE1  | GLU | A | 190 | 28.590 | 15.669 | 9.581  |
| ATOM | 3136 | OE2  | GLU | A | 190 | 28.577 | 17.768 | 8.983  |
| ATOM | 3137 | C    | GLU | A | 190 | 29.030 | 16.290 | 5.120  |
| ATOM | 3138 | O    | GLU | A | 190 | 29.857 | 15.592 | 4.533  |
| ATOM | 3139 | N    | ILE | A | 191 | 27.733 | 15.948 | 5.160  |
| ATOM | 3140 | H    | ILE | A | 191 | 27.083 | 16.578 | 5.625  |
| ATOM | 3141 | CA   | ILE | A | 191 | 27.200 | 14.769 | 4.443  |
| ATOM | 3142 | HA   | ILE | A | 191 | 27.775 | 13.890 | 4.727  |
| ATOM | 3143 | CB   | ILE | A | 191 | 25.715 | 14.519 | 4.817  |
| ATOM | 3144 | HB   | ILE | A | 191 | 25.171 | 15.458 | 4.717  |
| ATOM | 3145 | CG2  | ILE | A | 191 | 25.046 | 13.493 | 3.879  |
| ATOM | 3146 | HG21 | ILE | A | 191 | 25.045 | 13.864 | 2.855  |
| ATOM | 3147 | HG22 | ILE | A | 191 | 25.575 | 12.540 | 3.918  |
| ATOM | 3148 | HG23 | ILE | A | 191 | 24.006 | 13.335 | 4.158  |
| ATOM | 3149 | CG1  | ILE | A | 191 | 25.628 | 14.038 | 6.286  |
| ATOM | 3150 | HG12 | ILE | A | 191 | 26.095 | 13.056 | 6.369  |
| ATOM | 3151 | HG13 | ILE | A | 191 | 26.188 | 14.721 | 6.923  |
| ATOM | 3152 | CD1  | ILE | A | 191 | 24.204 | 13.951 | 6.850  |
| ATOM | 3153 | HD11 | ILE | A | 191 | 23.616 | 13.205 | 6.317  |
| ATOM | 3154 | HD12 | ILE | A | 191 | 24.244 | 13.663 | 7.898  |
| ATOM | 3155 | HD13 | ILE | A | 191 | 23.725 | 14.924 | 6.775  |
| ATOM | 3156 | C    | ILE | A | 191 | 27.429 | 14.922 | 2.935  |
| ATOM | 3157 | O    | ILE | A | 191 | 27.834 | 13.969 | 2.268  |
| ATOM | 3158 | N    | MET | A | 192 | 27.279 | 16.141 | 2.414  |
| ATOM | 3159 | H    | MET | A | 192 | 26.925 | 16.875 | 3.014  |
| ATOM | 3160 | CA   | MET | A | 192 | 27.561 | 16.490 | 1.020  |
| ATOM | 3161 | HA   | MET | A | 192 | 27.094 | 15.749 | 0.371  |
| ATOM | 3162 | CB   | MET | A | 192 | 26.935 | 17.865 | 0.712  |
| ATOM | 3163 | HB2  | MET | A | 192 | 27.322 | 18.612 | 1.405  |
| ATOM | 3164 | HB3  | MET | A | 192 | 27.240 | 18.164 | -0.291 |
| ATOM | 3165 | CG   | MET | A | 192 | 25.397 | 17.863 | 0.742  |
| ATOM | 3166 | HG2  | MET | A | 192 | 25.046 | 18.739 | 0.194  |
| ATOM | 3167 | HG3  | MET | A | 192 | 25.055 | 16.981 | 0.199  |
| ATOM | 3168 | SD   | MET | A | 192 | 24.594 | 17.879 | 2.371  |
| ATOM | 3169 | CE   | MET | A | 192 | 24.702 | 19.639 | 2.757  |
| ATOM | 3170 | HE1  | MET | A | 192 | 25.751 | 19.926 | 2.827  |
| ATOM | 3171 | HE2  | MET | A | 192 | 24.211 | 20.217 | 1.973  |
| ATOM | 3172 | HE3  | MET | A | 192 | 24.206 | 19.823 | 3.711  |
| ATOM | 3173 | C    | MET | A | 192 | 29.063 | 16.496 | 0.668  |
| ATOM | 3174 | O    | MET | A | 192 | 29.392 | 16.679 | -0.501 |
| ATOM | 3175 | N    | LEU | A | 193 | 29.978 | 16.351 | 1.642  |
| ATOM | 3176 | H    | LEU | A | 193 | 29.640 | 16.135 | 2.572  |
| ATOM | 3177 | CA   | LEU | A | 193 | 31.406 | 16.677 | 1.477  |
| ATOM | 3178 | HA   | LEU | A | 193 | 31.612 | 16.908 | 0.429  |
| ATOM | 3179 | CB   | LEU | A | 193 | 31.734 | 17.925 | 2.332  |
| ATOM | 3180 | HB2  | LEU | A | 193 | 31.641 | 17.654 | 3.385  |
| ATOM | 3181 | HB3  | LEU | A | 193 | 32.778 | 18.193 | 2.153  |
| ATOM | 3182 | CG   | LEU | A | 193 | 30.860 | 19.176 | 2.080  |
| ATOM | 3183 | HG   | LEU | A | 193 | 29.815 | 18.934 | 2.278  |
| ATOM | 3184 | CD1  | LEU | A | 193 | 31.279 | 20.285 | 3.055  |
| ATOM | 3185 | HD11 | LEU | A | 193 | 32.323 | 20.547 | 2.889  |
| ATOM | 3186 | HD12 | LEU | A | 193 | 30.658 | 21.168 | 2.902  |

|      |      |         |   |     |        |        |        |
|------|------|---------|---|-----|--------|--------|--------|
| ATOM | 3187 | HD13LEU | A | 193 | 31.154 | 19.946 | 4.083  |
| ATOM | 3188 | CD2 LEU | A | 193 | 30.973 | 19.709 | 0.644  |
| ATOM | 3189 | HD21LEU | A | 193 | 30.645 | 18.957 | -0.071 |
| ATOM | 3190 | HD22LEU | A | 193 | 30.338 | 20.587 | 0.529  |
| ATOM | 3191 | HD23LEU | A | 193 | 32.002 | 19.986 | 0.422  |
| ATOM | 3192 | C LEU   | A | 193 | 32.367 | 15.537 | 1.860  |
| ATOM | 3193 | O LEU   | A | 193 | 33.319 | 15.265 | 1.132  |
| ATOM | 3194 | N ASN   | A | 194 | 32.173 | 14.884 | 3.009  |
| ATOM | 3195 | H ASN   | A | 194 | 31.343 | 15.117 | 3.546  |
| ATOM | 3196 | CA ASN  | A | 194 | 33.220 | 14.109 | 3.697  |
| ATOM | 3197 | HA ASN  | A | 194 | 34.165 | 14.616 | 3.499  |
| ATOM | 3198 | CB ASN  | A | 194 | 32.971 | 14.202 | 5.216  |
| ATOM | 3199 | HB2 ASN | A | 194 | 32.596 | 15.195 | 5.458  |
| ATOM | 3200 | HB3 ASN | A | 194 | 32.207 | 13.483 | 5.514  |
| ATOM | 3201 | CG ASN  | A | 194 | 34.243 | 14.000 | 6.036  |
| ATOM | 3202 | OD1 ASN | A | 194 | 35.150 | 14.823 | 6.018  |
| ATOM | 3203 | ND2 ASN | A | 194 | 34.350 | 12.937 | 6.806  |
| ATOM | 3204 | HD21ASN | A | 194 | 35.187 | 12.796 | 7.351  |
| ATOM | 3205 | HD22ASN | A | 194 | 33.612 | 12.243 | 6.855  |
| ATOM | 3206 | C ASN   | A | 194 | 33.394 | 12.659 | 3.175  |
| ATOM | 3207 | O ASN   | A | 194 | 33.542 | 11.724 | 3.959  |
| ATOM | 3208 | N SER   | A | 195 | 33.337 | 12.456 | 1.854  |
| ATOM | 3209 | H SER   | A | 195 | 33.266 | 13.293 | 1.281  |
| ATOM | 3210 | CA SER  | A | 195 | 33.622 | 11.172 | 1.168  |
| ATOM | 3211 | HA SER  | A | 195 | 33.328 | 11.278 | 0.124  |
| ATOM | 3212 | CB SER  | A | 195 | 35.136 | 10.882 | 1.167  |
| ATOM | 3213 | HB2 SER | A | 195 | 35.512 | 10.928 | 2.188  |
| ATOM | 3214 | HB3 SER | A | 195 | 35.307 | 9.880  | 0.774  |
| ATOM | 3215 | OG SER  | A | 195 | 35.874 | 11.787 | 0.364  |
| ATOM | 3216 | HG SER  | A | 195 | 36.744 | 11.382 | 0.231  |
| ATOM | 3217 | C SER   | A | 195 | 32.809 | 9.961  | 1.699  |
| ATOM | 3218 | O SER   | A | 195 | 33.313 | 8.840  | 1.778  |
| ATOM | 3219 | N LYS   | A | 196 | 31.560 | 10.176 | 2.137  |
| ATOM | 3220 | H LYS   | A | 196 | 31.189 | 11.113 | 2.066  |
| ATOM | 3221 | CA LYS  | A | 196 | 30.683 | 9.138  | 2.722  |
| ATOM | 3222 | HA LYS  | A | 196 | 29.756 | 9.627  | 2.999  |
| ATOM | 3223 | CB LYS  | A | 196 | 30.291 | 8.064  | 1.681  |
| ATOM | 3224 | HB2 LYS | A | 196 | 31.170 | 7.500  | 1.368  |
| ATOM | 3225 | HB3 LYS | A | 196 | 29.597 | 7.366  | 2.152  |
| ATOM | 3226 | CG LYS  | A | 196 | 29.591 | 8.690  | 0.464  |
| ATOM | 3227 | HG2 LYS | A | 196 | 28.788 | 9.336  | 0.820  |
| ATOM | 3228 | HG3 LYS | A | 196 | 30.304 | 9.301  | -0.094 |
| ATOM | 3229 | CD LYS  | A | 196 | 28.979 | 7.653  | -0.484 |
| ATOM | 3230 | HD2 LYS | A | 196 | 28.244 | 7.058  | 0.062  |
| ATOM | 3231 | HD3 LYS | A | 196 | 28.467 | 8.201  | -1.276 |
| ATOM | 3232 | CE LYS  | A | 196 | 30.032 | 6.731  | -1.109 |
| ATOM | 3233 | HE2 LYS | A | 196 | 30.856 | 7.340  | -1.491 |
| ATOM | 3234 | HE3 LYS | A | 196 | 30.430 | 6.062  | -0.342 |
| ATOM | 3235 | NZ LYS  | A | 196 | 29.446 | 5.953  | -2.222 |
| ATOM | 3236 | HZ1 LYS | A | 196 | 28.742 | 5.311  | -1.898 |
| ATOM | 3237 | HZ2 LYS | A | 196 | 29.028 | 6.580  | -2.907 |
| ATOM | 3238 | HZ3 LYS | A | 196 | 30.148 | 5.435  | -2.746 |
| ATOM | 3239 | C LYS   | A | 196 | 31.210 | 8.547  | 4.051  |
| ATOM | 3240 | O LYS   | A | 196 | 30.793 | 7.468  | 4.463  |
| ATOM | 3241 | N GLY   | A | 197 | 32.130 | 9.241  | 4.732  |
| ATOM | 3242 | H GLY   | A | 197 | 32.486 | 10.087 | 4.301  |
| ATOM | 3243 | CA GLY  | A | 197 | 32.607 | 8.922  | 6.083  |

|      |      |      |     |   |     |        |        |        |
|------|------|------|-----|---|-----|--------|--------|--------|
| ATOM | 3244 | HA2  | GLY | A | 197 | 32.312 | 7.912  | 6.372  |
| ATOM | 3245 | HA3  | GLY | A | 197 | 33.694 | 9.015  | 6.114  |
| ATOM | 3246 | C    | GLY | A | 197 | 32.041 | 9.896  | 7.109  |
| ATOM | 3247 | O    | GLY | A | 197 | 32.792 | 10.690 | 7.661  |
| ATOM | 3248 | N    | TYR | A | 198 | 30.730 | 9.862  | 7.351  |
| ATOM | 3249 | H    | TYR | A | 198 | 30.180 | 9.158  | 6.877  |
| ATOM | 3250 | CA   | TYR | A | 198 | 30.060 | 10.659 | 8.397  |
| ATOM | 3251 | HA   | TYR | A | 198 | 30.742 | 11.443 | 8.729  |
| ATOM | 3252 | CB   | TYR | A | 198 | 28.806 | 11.375 | 7.857  |
| ATOM | 3253 | HB2  | TYR | A | 198 | 28.038 | 11.395 | 8.632  |
| ATOM | 3254 | HB3  | TYR | A | 198 | 29.080 | 12.412 | 7.651  |
| ATOM | 3255 | CG   | TYR | A | 198 | 28.203 | 10.793 | 6.596  |
| ATOM | 3256 | CD1  | TYR | A | 198 | 27.378 | 9.652  | 6.655  |
| ATOM | 3257 | HD1  | TYR | A | 198 | 27.162 | 9.196  | 7.612  |
| ATOM | 3258 | CE1  | TYR | A | 198 | 26.851 | 9.102  | 5.470  |
| ATOM | 3259 | HE1  | TYR | A | 198 | 26.231 | 8.218  | 5.503  |
| ATOM | 3260 | CZ   | TYR | A | 198 | 27.146 | 9.708  | 4.226  |
| ATOM | 3261 | OH   | TYR | A | 198 | 26.699 | 9.167  | 3.065  |
| ATOM | 3262 | HH   | TYR | A | 198 | 26.097 | 8.418  | 3.187  |
| ATOM | 3263 | CE2  | TYR | A | 198 | 27.943 | 10.871 | 4.175  |
| ATOM | 3264 | HE2  | TYR | A | 198 | 28.135 | 11.345 | 3.221  |
| ATOM | 3265 | CD2  | TYR | A | 198 | 28.493 | 11.394 | 5.357  |
| ATOM | 3266 | HD2  | TYR | A | 198 | 29.136 | 12.262 | 5.315  |
| ATOM | 3267 | C    | TYR | A | 198 | 29.739 | 9.812  | 9.640  |
| ATOM | 3268 | O    | TYR | A | 198 | 29.497 | 8.609  | 9.544  |
| ATOM | 3269 | N    | THR | A | 199 | 29.747 | 10.455 | 10.811 |
| ATOM | 3270 | H    | THR | A | 199 | 29.860 | 11.462 | 10.785 |
| ATOM | 3271 | CA   | THR | A | 199 | 29.640 | 9.825  | 12.140 |
| ATOM | 3272 | HA   | THR | A | 199 | 29.334 | 8.785  | 12.018 |
| ATOM | 3273 | CB   | THR | A | 199 | 31.018 | 9.812  | 12.835 |
| ATOM | 3274 | HB   | THR | A | 199 | 30.906 | 9.576  | 13.892 |
| ATOM | 3275 | CG2  | THR | A | 199 | 31.914 | 8.746  | 12.206 |
| ATOM | 3276 | HG21 | THR | A | 199 | 32.899 | 8.767  | 12.667 |
| ATOM | 3277 | HG22 | THR | A | 199 | 31.469 | 7.766  | 12.372 |
| ATOM | 3278 | HG23 | THR | A | 199 | 32.022 | 8.911  | 11.135 |
| ATOM | 3279 | OG1  | THR | A | 199 | 31.705 | 11.039 | 12.723 |
| ATOM | 3280 | HG1  | THR | A | 199 | 32.613 | 10.813 | 12.472 |
| ATOM | 3281 | C    | THR | A | 199 | 28.531 | 10.471 | 12.971 |
| ATOM | 3282 | O    | THR | A | 199 | 27.832 | 11.361 | 12.493 |
| ATOM | 3283 | N    | LYS | A | 200 | 28.349 | 10.030 | 14.220 |
| ATOM | 3284 | H    | LYS | A | 200 | 28.947 | 9.268  | 14.528 |
| ATOM | 3285 | CA   | LYS | A | 200 | 27.269 | 10.418 | 15.156 |
| ATOM | 3286 | HA   | LYS | A | 200 | 26.326 | 10.016 | 14.783 |
| ATOM | 3287 | CB   | LYS | A | 200 | 27.558 | 9.747  | 16.514 |
| ATOM | 3288 | HB2  | LYS | A | 200 | 26.739 | 9.965  | 17.192 |
| ATOM | 3289 | HB3  | LYS | A | 200 | 27.609 | 8.664  | 16.383 |
| ATOM | 3290 | CG   | LYS | A | 200 | 28.860 | 10.252 | 17.152 |
| ATOM | 3291 | HG2  | LYS | A | 200 | 29.697 | 10.021 | 16.496 |
| ATOM | 3292 | HG3  | LYS | A | 200 | 28.798 | 11.331 | 17.259 |
| ATOM | 3293 | CD   | LYS | A | 200 | 29.132 | 9.642  | 18.527 |
| ATOM | 3294 | HD2  | LYS | A | 200 | 28.329 | 9.902  | 19.215 |
| ATOM | 3295 | HD3  | LYS | A | 200 | 29.200 | 8.559  | 18.434 |
| ATOM | 3296 | CE   | LYS | A | 200 | 30.460 | 10.213 | 19.027 |
| ATOM | 3297 | HE2  | LYS | A | 200 | 31.217 | 10.025 | 18.262 |
| ATOM | 3298 | HE3  | LYS | A | 200 | 30.374 | 11.296 | 19.154 |
| ATOM | 3299 | NZ   | LYS | A | 200 | 30.913 | 9.583  | 20.283 |
| ATOM | 3300 | HZ1  | LYS | A | 200 | 30.486 | 10.007 | 21.100 |

|      |      |      |     |   |     |        |        |        |
|------|------|------|-----|---|-----|--------|--------|--------|
| ATOM | 3301 | HZ2  | LYS | A | 200 | 30.734 | 8.583  | 20.284 |
| ATOM | 3302 | HZ3  | LYS | A | 200 | 31.918 | 9.718  | 20.362 |
| ATOM | 3303 | C    | LYS | A | 200 | 27.031 | 11.936 | 15.318 |
| ATOM | 3304 | O    | LYS | A | 200 | 25.963 | 12.366 | 15.751 |
| ATOM | 3305 | N    | SER | A | 201 | 27.994 | 12.757 | 14.912 |
| ATOM | 3306 | H    | SER | A | 201 | 28.803 | 12.328 | 14.490 |
| ATOM | 3307 | CA   | SER | A | 201 | 27.878 | 14.208 | 14.784 |
| ATOM | 3308 | HA   | SER | A | 201 | 27.696 | 14.634 | 15.770 |
| ATOM | 3309 | CB   | SER | A | 201 | 29.219 | 14.747 | 14.263 |
| ATOM | 3310 | HB2  | SER | A | 201 | 29.178 | 15.834 | 14.185 |
| ATOM | 3311 | HB3  | SER | A | 201 | 29.999 | 14.481 | 14.975 |
| ATOM | 3312 | OG   | SER | A | 201 | 29.553 | 14.192 | 13.003 |
| ATOM | 3313 | HG   | SER | A | 201 | 30.528 | 14.257 | 12.887 |
| ATOM | 3314 | C    | SER | A | 201 | 26.724 | 14.672 | 13.872 |
| ATOM | 3315 | O    | SER | A | 201 | 26.286 | 15.816 | 13.995 |
| ATOM | 3316 | N    | ILE | A | 202 | 26.208 | 13.833 | 12.963 |
| ATOM | 3317 | H    | ILE | A | 202 | 26.685 | 12.945 | 12.807 |
| ATOM | 3318 | CA   | ILE | A | 202 | 25.024 | 14.152 | 12.133 |
| ATOM | 3319 | HA   | ILE | A | 202 | 25.125 | 15.173 | 11.763 |
| ATOM | 3320 | CB   | ILE | A | 202 | 24.937 | 13.219 | 10.899 |
| ATOM | 3321 | HB   | ILE | A | 202 | 24.107 | 13.576 | 10.288 |
| ATOM | 3322 | CG2  | ILE | A | 202 | 26.215 | 13.367 | 10.053 |
| ATOM | 3323 | HG21 | ILE | A | 202 | 27.068 | 12.924 | 10.564 |
| ATOM | 3324 | HG22 | ILE | A | 202 | 26.095 | 12.879 | 9.087  |
| ATOM | 3325 | HG23 | ILE | A | 202 | 26.412 | 14.421 | 9.877  |
| ATOM | 3326 | CG1  | ILE | A | 202 | 24.621 | 11.747 | 11.260 |
| ATOM | 3327 | HG12 | ILE | A | 202 | 25.316 | 11.390 | 12.015 |
| ATOM | 3328 | HG13 | ILE | A | 202 | 23.623 | 11.700 | 11.691 |
| ATOM | 3329 | CD1  | ILE | A | 202 | 24.648 | 10.773 | 10.077 |
| ATOM | 3330 | HD11 | ILE | A | 202 | 24.307 | 9.797  | 10.420 |
| ATOM | 3331 | HD12 | ILE | A | 202 | 23.985 | 11.132 | 9.289  |
| ATOM | 3332 | HD13 | ILE | A | 202 | 25.663 | 10.670 | 9.692  |
| ATOM | 3333 | C    | ILE | A | 202 | 23.712 | 14.150 | 12.932 |
| ATOM | 3334 | O    | ILE | A | 202 | 22.835 | 14.983 | 12.694 |
| ATOM | 3335 | N    | ASP | C | 203 | 23.590 | 13.261 | 13.919 |
| ATOM | 3336 | H    | ASP | C | 203 | 24.351 | 12.620 | 14.090 |
| ATOM | 3337 | CA   | ASP | C | 203 | 22.419 | 13.186 | 14.798 |
| ATOM | 3338 | HA   | ASP | C | 203 | 21.512 | 13.220 | 14.192 |
| ATOM | 3339 | CB   | ASP | C | 203 | 22.432 | 11.850 | 15.567 |
| ATOM | 3340 | HB2  | ASP | C | 203 | 23.326 | 11.827 | 16.191 |
| ATOM | 3341 | HB3  | ASP | C | 203 | 21.572 | 11.834 | 16.234 |
| ATOM | 3342 | CG   | ASP | C | 203 | 22.394 | 10.570 | 14.706 |
| ATOM | 3343 | OD1  | ASP | C | 203 | 21.773 | 10.560 | 13.618 |
| ATOM | 3344 | OD2  | ASP | C | 203 | 22.978 | 9.560  | 15.166 |
| ATOM | 3345 | C    | ASP | C | 203 | 22.410 | 14.391 | 15.764 |
| ATOM | 3346 | O    | ASP | C | 203 | 21.352 | 14.924 | 16.105 |
| ATOM | 3347 | N    | ILE | A | 204 | 23.601 | 14.883 | 16.132 |
| ATOM | 3348 | H    | ILE | A | 204 | 24.411 | 14.372 | 15.804 |
| ATOM | 3349 | CA   | ILE | A | 204 | 23.808 | 16.119 | 16.911 |
| ATOM | 3350 | HA   | ILE | A | 204 | 23.218 | 16.066 | 17.822 |
| ATOM | 3351 | CB   | ILE | A | 204 | 25.292 | 16.258 | 17.310 |
| ATOM | 3352 | HB   | ILE | A | 204 | 25.893 | 16.218 | 16.406 |
| ATOM | 3353 | CG2  | ILE | A | 204 | 25.583 | 17.620 | 17.961 |
| ATOM | 3354 | HG21 | ILE | A | 204 | 26.612 | 17.638 | 18.317 |
| ATOM | 3355 | HG22 | ILE | A | 204 | 25.468 | 18.420 | 17.230 |
| ATOM | 3356 | HG23 | ILE | A | 204 | 24.901 | 17.799 | 18.792 |
| ATOM | 3357 | CG1  | ILE | A | 204 | 25.765 | 15.102 | 18.215 |

|      |      |         |   |     |        |        |        |
|------|------|---------|---|-----|--------|--------|--------|
| ATOM | 3358 | HG12ILE | A | 204 | 25.575 | 14.149 | 17.722 |
| ATOM | 3359 | HG13ILE | A | 204 | 26.841 | 15.194 | 18.323 |
| ATOM | 3360 | CD1 ILE | A | 204 | 25.147 | 15.050 | 19.619 |
| ATOM | 3361 | HD11ILE | A | 204 | 24.074 | 14.869 | 19.561 |
| ATOM | 3362 | HD12ILE | A | 204 | 25.613 | 14.235 | 20.167 |
| ATOM | 3363 | HD13ILE | A | 204 | 25.337 | 15.973 | 20.163 |
| ATOM | 3364 | C ILE   | A | 204 | 23.314 | 17.357 | 16.155 |
| ATOM | 3365 | O ILE   | A | 204 | 22.510 | 18.117 | 16.690 |
| ATOM | 3366 | N TRP   | A | 205 | 23.738 | 17.540 | 14.900 |
| ATOM | 3367 | H TRP   | A | 205 | 24.401 | 16.884 | 14.509 |
| ATOM | 3368 | CA TRP  | A | 205 | 23.202 | 18.602 | 14.039 |
| ATOM | 3369 | HA TRP  | A | 205 | 23.393 | 19.571 | 14.499 |
| ATOM | 3370 | CB TRP  | A | 205 | 23.921 | 18.554 | 12.682 |
| ATOM | 3371 | HB2 TRP | A | 205 | 24.973 | 18.791 | 12.830 |
| ATOM | 3372 | HB3 TRP | A | 205 | 23.863 | 17.538 | 12.291 |
| ATOM | 3373 | CG TRP  | A | 205 | 23.365 | 19.482 | 11.645 |
| ATOM | 3374 | CD1 TRP | A | 205 | 22.268 | 19.229 | 10.901 |
| ATOM | 3375 | HD1 TRP | A | 205 | 21.676 | 18.323 | 10.963 |
| ATOM | 3376 | NE1 TRP | A | 205 | 21.997 | 20.300 | 10.078 |
| ATOM | 3377 | HE1 TRP | A | 205 | 21.223 | 20.310 | 9.426  |
| ATOM | 3378 | CE2 TRP | A | 205 | 22.909 | 21.316 | 10.254 |
| ATOM | 3379 | CZ2 TRP | A | 205 | 23.057 | 22.584 | 9.675  |
| ATOM | 3380 | HZ2 TRP | A | 205 | 22.348 | 22.936 | 8.941  |
| ATOM | 3381 | CH2 TRP | A | 205 | 24.142 | 23.388 | 10.058 |
| ATOM | 3382 | HH2 TRP | A | 205 | 24.266 | 24.368 | 9.621  |
| ATOM | 3383 | CZ3 TRP | A | 205 | 25.072 | 22.910 | 10.997 |
| ATOM | 3384 | HZ3 TRP | A | 205 | 25.922 | 23.520 | 11.263 |
| ATOM | 3385 | CE3 TRP | A | 205 | 24.906 | 21.639 | 11.580 |
| ATOM | 3386 | HE3 TRP | A | 205 | 25.626 | 21.277 | 12.296 |
| ATOM | 3387 | CD2 TRP | A | 205 | 23.818 | 20.811 | 11.233 |
| ATOM | 3388 | C TRP   | A | 205 | 21.674 | 18.472 | 13.885 |
| ATOM | 3389 | O TRP   | A | 205 | 20.951 | 19.468 | 13.913 |
| ATOM | 3390 | N SER   | C | 206 | 21.172 | 17.238 | 13.781 |
| ATOM | 3391 | H SER   | C | 206 | 21.827 | 16.466 | 13.711 |
| ATOM | 3392 | CA SER  | C | 206 | 19.735 | 16.963 | 13.676 |
| ATOM | 3393 | HA SER  | C | 206 | 19.331 | 17.543 | 12.844 |
| ATOM | 3394 | CB SER  | C | 206 | 19.493 | 15.481 | 13.352 |
| ATOM | 3395 | HB2 SER | C | 206 | 19.817 | 14.855 | 14.180 |
| ATOM | 3396 | HB3 SER | C | 206 | 18.422 | 15.329 | 13.211 |
| ATOM | 3397 | OG SER  | C | 206 | 20.165 | 15.084 | 12.168 |
| ATOM | 3398 | HG SER  | C | 206 | 21.127 | 15.017 | 12.337 |
| ATOM | 3399 | C SER   | C | 206 | 18.960 | 17.397 | 14.937 |
| ATOM | 3400 | O SER   | C | 206 | 17.984 | 18.135 | 14.811 |
| ATOM | 3401 | N VAL   | A | 207 | 19.398 | 17.041 | 16.154 |
| ATOM | 3402 | H VAL   | A | 207 | 20.223 | 16.440 | 16.222 |
| ATOM | 3403 | CA VAL  | A | 207 | 18.744 | 17.526 | 17.394 |
| ATOM | 3404 | HA VAL  | A | 207 | 17.675 | 17.371 | 17.248 |
| ATOM | 3405 | CB VAL  | A | 207 | 19.118 | 16.689 | 18.643 |
| ATOM | 3406 | HB VAL  | A | 207 | 18.925 | 15.643 | 18.398 |
| ATOM | 3407 | CG1 VAL | A | 207 | 20.593 | 16.799 | 19.040 |
| ATOM | 3408 | HG11VAL | A | 207 | 21.204 | 16.468 | 18.210 |
| ATOM | 3409 | HG12VAL | A | 207 | 20.846 | 17.828 | 19.293 |
| ATOM | 3410 | HG13VAL | A | 207 | 20.800 | 16.155 | 19.895 |
| ATOM | 3411 | CG2 VAL | A | 207 | 18.240 | 17.032 | 19.859 |
| ATOM | 3412 | HG21VAL | A | 207 | 18.473 | 18.032 | 20.224 |
| ATOM | 3413 | HG22VAL | A | 207 | 17.186 | 16.988 | 19.584 |
| ATOM | 3414 | HG23VAL | A | 207 | 18.423 | 16.317 | 20.663 |

|      |      |      |     |   |     |        |        |        |
|------|------|------|-----|---|-----|--------|--------|--------|
| ATOM | 3415 | C    | VAL | A | 207 | 18.941 | 19.042 | 17.606 |
| ATOM | 3416 | O    | VAL | A | 207 | 18.065 | 19.693 | 18.175 |
| ATOM | 3417 | N    | GLY | A | 208 | 20.004 | 19.642 | 17.048 |
| ATOM | 3418 | H    | GLY | A | 208 | 20.739 | 19.059 | 16.653 |
| ATOM | 3419 | CA   | GLY | A | 208 | 20.164 | 21.101 | 16.970 |
| ATOM | 3420 | HA2  | GLY | A | 208 | 20.121 | 21.522 | 17.976 |
| ATOM | 3421 | HA3  | GLY | A | 208 | 21.126 | 21.329 | 16.514 |
| ATOM | 3422 | C    | GLY | A | 208 | 19.080 | 21.777 | 16.127 |
| ATOM | 3423 | O    | GLY | A | 208 | 18.608 | 22.856 | 16.487 |
| ATOM | 3424 | N    | CYS | A | 209 | 18.631 | 21.128 | 15.046 |
| ATOM | 3425 | H    | CYS | A | 209 | 19.064 | 20.243 | 14.804 |
| ATOM | 3426 | CA   | CYS | A | 209 | 17.497 | 21.594 | 14.242 |
| ATOM | 3427 | HA   | CYS | A | 209 | 17.650 | 22.647 | 14.003 |
| ATOM | 3428 | CB   | CYS | A | 209 | 17.435 | 20.813 | 12.918 |
| ATOM | 3429 | HB2  | CYS | A | 209 | 17.356 | 19.746 | 13.115 |
| ATOM | 3430 | HB3  | CYS | A | 209 | 16.543 | 21.115 | 12.364 |
| ATOM | 3431 | SG   | CYS | A | 209 | 18.901 | 21.137 | 11.894 |
| ATOM | 3432 | HG   | CYS | A | 209 | 19.817 | 20.608 | 12.725 |
| ATOM | 3433 | C    | CYS | A | 209 | 16.177 | 21.518 | 15.033 |
| ATOM | 3434 | O    | CYS | A | 209 | 15.377 | 22.450 | 14.956 |
| ATOM | 3435 | N    | ILE | A | 210 | 15.989 | 20.485 | 15.868 |
| ATOM | 3436 | H    | ILE | A | 210 | 16.667 | 19.732 | 15.840 |
| ATOM | 3437 | CA   | ILE | A | 210 | 14.840 | 20.414 | 16.801 |
| ATOM | 3438 | HA   | ILE | A | 210 | 13.923 | 20.543 | 16.220 |
| ATOM | 3439 | CB   | ILE | A | 210 | 14.747 | 19.057 | 17.553 |
| ATOM | 3440 | HB   | ILE | A | 210 | 15.600 | 18.965 | 18.226 |
| ATOM | 3441 | CG2  | ILE | A | 210 | 13.458 | 19.011 | 18.402 |
| ATOM | 3442 | HG21 | ILE | A | 210 | 12.580 | 19.058 | 17.756 |
| ATOM | 3443 | HG22 | ILE | A | 210 | 13.423 | 18.098 | 18.995 |
| ATOM | 3444 | HG23 | ILE | A | 210 | 13.424 | 19.842 | 19.103 |
| ATOM | 3445 | CG1  | ILE | A | 210 | 14.775 | 17.867 | 16.573 |
| ATOM | 3446 | HG12 | ILE | A | 210 | 13.953 | 17.970 | 15.868 |
| ATOM | 3447 | HG13 | ILE | A | 210 | 15.708 | 17.900 | 16.019 |
| ATOM | 3448 | CD1  | ILE | A | 210 | 14.693 | 16.478 | 17.216 |
| ATOM | 3449 | HD11 | ILE | A | 210 | 13.704 | 16.313 | 17.640 |
| ATOM | 3450 | HD12 | ILE | A | 210 | 14.871 | 15.722 | 16.452 |
| ATOM | 3451 | HD13 | ILE | A | 210 | 15.453 | 16.381 | 17.991 |
| ATOM | 3452 | C    | ILE | A | 210 | 14.883 | 21.585 | 17.790 |
| ATOM | 3453 | O    | ILE | A | 210 | 13.855 | 22.218 | 18.010 |
| ATOM | 3454 | N    | LEU | A | 211 | 16.052 | 21.912 | 18.356 |
| ATOM | 3455 | H    | LEU | A | 211 | 16.861 | 21.338 | 18.151 |
| ATOM | 3456 | CA   | LEU | A | 211 | 16.208 | 23.044 | 19.282 |
| ATOM | 3457 | HA   | LEU | A | 211 | 15.492 | 22.905 | 20.090 |
| ATOM | 3458 | CB   | LEU | A | 211 | 17.641 | 23.043 | 19.869 |
| ATOM | 3459 | HB2  | LEU | A | 211 | 18.078 | 22.049 | 19.751 |
| ATOM | 3460 | HB3  | LEU | A | 211 | 18.258 | 23.733 | 19.294 |
| ATOM | 3461 | CG   | LEU | A | 211 | 17.731 | 23.397 | 21.371 |
| ATOM | 3462 | HG   | LEU | A | 211 | 17.275 | 22.582 | 21.933 |
| ATOM | 3463 | CD1  | LEU | A | 211 | 19.207 | 23.503 | 21.787 |
| ATOM | 3464 | HD11 | LEU | A | 211 | 19.279 | 23.680 | 22.861 |
| ATOM | 3465 | HD12 | LEU | A | 211 | 19.725 | 22.574 | 21.554 |
| ATOM | 3466 | HD13 | LEU | A | 211 | 19.690 | 24.326 | 21.259 |
| ATOM | 3467 | CD2  | LEU | A | 211 | 17.012 | 24.695 | 21.766 |
| ATOM | 3468 | HD21 | LEU | A | 211 | 17.194 | 24.916 | 22.819 |
| ATOM | 3469 | HD22 | LEU | A | 211 | 17.380 | 25.521 | 21.159 |
| ATOM | 3470 | HD23 | LEU | A | 211 | 15.937 | 24.590 | 21.631 |
| ATOM | 3471 | C    | LEU | A | 211 | 15.846 | 24.378 | 18.603 |

|      |      |      |     |   |     |        |        |        |
|------|------|------|-----|---|-----|--------|--------|--------|
| ATOM | 3472 | O    | LEU | A | 211 | 15.128 | 25.188 | 19.183 |
| ATOM | 3473 | N    | ALA | A | 212 | 16.265 | 24.583 | 17.350 |
| ATOM | 3474 | H    | ALA | A | 212 | 16.881 | 23.895 | 16.933 |
| ATOM | 3475 | CA   | ALA | A | 212 | 15.856 | 25.739 | 16.548 |
| ATOM | 3476 | HA   | ALA | A | 212 | 16.101 | 26.649 | 17.099 |
| ATOM | 3477 | CB   | ALA | A | 212 | 16.663 | 25.739 | 15.246 |
| ATOM | 3478 | HB1  | ALA | A | 212 | 17.723 | 25.854 | 15.474 |
| ATOM | 3479 | HB2  | ALA | A | 212 | 16.509 | 24.809 | 14.700 |
| ATOM | 3480 | HB3  | ALA | A | 212 | 16.344 | 26.573 | 14.622 |
| ATOM | 3481 | C    | ALA | A | 212 | 14.335 | 25.782 | 16.292 |
| ATOM | 3482 | O    | ALA | A | 212 | 13.738 | 26.853 | 16.418 |
| ATOM | 3483 | N    | GLU | A | 213 | 13.686 | 24.651 | 15.987 |
| ATOM | 3484 | H    | GLU | A | 213 | 14.221 | 23.795 | 15.865 |
| ATOM | 3485 | CA   | GLU | A | 213 | 12.222 | 24.595 | 15.862 |
| ATOM | 3486 | HA   | GLU | A | 213 | 11.915 | 25.396 | 15.188 |
| ATOM | 3487 | CB   | GLU | A | 213 | 11.759 | 23.260 | 15.243 |
| ATOM | 3488 | HB2  | GLU | A | 213 | 12.303 | 22.427 | 15.687 |
| ATOM | 3489 | HB3  | GLU | A | 213 | 10.704 | 23.135 | 15.462 |
| ATOM | 3490 | CG   | GLU | A | 213 | 11.919 | 23.245 | 13.716 |
| ATOM | 3491 | HG2  | GLU | A | 213 | 11.508 | 24.172 | 13.320 |
| ATOM | 3492 | HG3  | GLU | A | 213 | 12.975 | 23.206 | 13.462 |
| ATOM | 3493 | CD   | GLU | A | 213 | 11.193 | 22.083 | 13.030 |
| ATOM | 3494 | OE1  | GLU | A | 213 | 10.097 | 22.333 | 12.485 |
| ATOM | 3495 | OE2  | GLU | A | 213 | 11.749 | 20.962 | 12.982 |
| ATOM | 3496 | C    | GLU | A | 213 | 11.517 | 24.875 | 17.205 |
| ATOM | 3497 | O    | GLU | A | 213 | 10.552 | 25.642 | 17.232 |
| ATOM | 3498 | N    | MET | A | 214 | 12.033 | 24.367 | 18.333 |
| ATOM | 3499 | H    | MET | A | 214 | 12.817 | 23.725 | 18.256 |
| ATOM | 3500 | CA   | MET | A | 214 | 11.539 | 24.697 | 19.683 |
| ATOM | 3501 | HA   | MET | A | 214 | 10.479 | 24.457 | 19.734 |
| ATOM | 3502 | CB   | MET | A | 214 | 12.278 | 23.868 | 20.749 |
| ATOM | 3503 | HB2  | MET | A | 214 | 13.355 | 23.950 | 20.614 |
| ATOM | 3504 | HB3  | MET | A | 214 | 12.033 | 24.279 | 21.725 |
| ATOM | 3505 | CG   | MET | A | 214 | 11.861 | 22.393 | 20.740 |
| ATOM | 3506 | HG2  | MET | A | 214 | 10.776 | 22.356 | 20.693 |
| ATOM | 3507 | HG3  | MET | A | 214 | 12.243 | 21.914 | 19.841 |
| ATOM | 3508 | SD   | MET | A | 214 | 12.345 | 21.415 | 22.187 |
| ATOM | 3509 | CE   | MET | A | 214 | 14.126 | 21.306 | 21.913 |
| ATOM | 3510 | HE1  | MET | A | 214 | 14.576 | 22.290 | 22.030 |
| ATOM | 3511 | HE2  | MET | A | 214 | 14.553 | 20.626 | 22.647 |
| ATOM | 3512 | HE3  | MET | A | 214 | 14.323 | 20.926 | 20.912 |
| ATOM | 3513 | C    | MET | A | 214 | 11.641 | 26.194 | 20.017 |
| ATOM | 3514 | O    | MET | A | 214 | 10.866 | 26.699 | 20.828 |
| ATOM | 3515 | N    | LEU | A | 215 | 12.558 | 26.921 | 19.375 |
| ATOM | 3516 | H    | LEU | A | 215 | 13.195 | 26.430 | 18.757 |
| ATOM | 3517 | CA   | LEU | A | 215 | 12.751 | 28.364 | 19.526 |
| ATOM | 3518 | HA   | LEU | A | 215 | 12.282 | 28.695 | 20.452 |
| ATOM | 3519 | CB   | LEU | A | 215 | 14.269 | 28.636 | 19.609 |
| ATOM | 3520 | HB2  | LEU | A | 215 | 14.743 | 28.200 | 18.729 |
| ATOM | 3521 | HB3  | LEU | A | 215 | 14.448 | 29.711 | 19.570 |
| ATOM | 3522 | CG   | LEU | A | 215 | 14.957 | 28.088 | 20.878 |
| ATOM | 3523 | HG   | LEU | A | 215 | 14.734 | 27.028 | 20.991 |
| ATOM | 3524 | CD1  | LEU | A | 215 | 16.479 | 28.234 | 20.724 |
| ATOM | 3525 | HD11 | LEU | A | 215 | 16.980 | 27.926 | 21.643 |
| ATOM | 3526 | HD12 | LEU | A | 215 | 16.827 | 27.601 | 19.906 |
| ATOM | 3527 | HD13 | LEU | A | 215 | 16.743 | 29.265 | 20.499 |
| ATOM | 3528 | CD2  | LEU | A | 215 | 14.469 | 28.810 | 22.145 |



|      |      |         |     |       |        |        |        |
|------|------|---------|-----|-------|--------|--------|--------|
| ATOM | 3529 | HD21LEU | A   | 215   | 14.562 | 29.888 | 22.025 |
| ATOM | 3530 | HD22LEU | A   | 215   | 13.424 | 28.567 | 22.335 |
| ATOM | 3531 | HD23LEU | A   | 215   | 15.056 | 28.488 | 23.006 |
| ATOM | 3532 | C       | LEU | A 215 | 12.073 | 29.193 | 18.419 |
| ATOM | 3533 | O       | LEU | A 215 | 12.329 | 30.392 | 18.337 |
| ATOM | 3534 | N       | SER | A 216 | 11.229 | 28.623 | 17.550 |
| ATOM | 3535 | H       | SER | A 216 | 11.035 | 27.631 | 17.628 |
| ATOM | 3536 | CA      | SER | A 216 | 10.684 | 29.409 | 16.420 |
| ATOM | 3537 | HA      | SER | A 216 | 10.406 | 30.397 | 16.789 |
| ATOM | 3538 | CB      | SER | A 216 | 11.788 | 29.596 | 15.369 |
| ATOM | 3539 | HB2     | SER | A 216 | 11.399 | 30.205 | 14.552 |
| ATOM | 3540 | HB3     | SER | A 216 | 12.631 | 30.127 | 15.811 |
| ATOM | 3541 | OG      | SER | A 216 | 12.228 | 28.350 | 14.852 |
| ATOM | 3542 | HG      | SER | A 216 | 12.698 | 27.859 | 15.564 |
| ATOM | 3543 | C       | SER | A 216 | 9.434  | 28.888 | 15.696 |
| ATOM | 3544 | O       | SER | A 216 | 8.832  | 29.642 | 14.930 |
| ATOM | 3545 | N       | ASN | A 217 | 9.062  | 27.615 | 15.860 |
| ATOM | 3546 | H       | ASN | A 217 | 9.590  | 27.033 | 16.500 |
| ATOM | 3547 | CA      | ASN | A 217 | 8.000  | 26.950 | 15.093 |
| ATOM | 3548 | HA      | ASN | A 217 | 8.069  | 25.898 | 15.358 |
| ATOM | 3549 | CB      | ASN | A 217 | 6.606  | 27.446 | 15.515 |
| ATOM | 3550 | HB2     | ASN | A 217 | 6.524  | 28.514 | 15.338 |
| ATOM | 3551 | HB3     | ASN | A 217 | 5.849  | 26.951 | 14.908 |
| ATOM | 3552 | CG      | ASN | A 217 | 6.293  | 27.149 | 16.971 |
| ATOM | 3553 | OD1     | ASN | A 217 | 6.254  | 28.031 | 17.818 |
| ATOM | 3554 | ND2     | ASN | A 217 | 6.035  | 25.902 | 17.302 |
| ATOM | 3555 | HD21ASN | A   | 217   | 5.747  | 25.723 | 18.257 |
| ATOM | 3556 | HD22ASN | A   | 217   | 6.106  | 25.167 | 16.608 |
| ATOM | 3557 | C       | ASN | A 217 | 8.227  | 27.002 | 13.563 |
| ATOM | 3558 | O       | ASN | A 217 | 7.281  | 27.131 | 12.776 |
| ATOM | 3559 | N       | ARG | A 218 | 9.493  | 26.915 | 13.128 |
| ATOM | 3560 | H       | ARG | A 218 | 10.230 | 26.885 | 13.822 |
| ATOM | 3561 | CA      | ARG | A 218 | 9.889  | 26.785 | 11.719 |
| ATOM | 3562 | HA      | ARG | A 218 | 9.177  | 26.102 | 11.256 |
| ATOM | 3563 | CB      | ARG | A 218 | 9.793  | 28.136 | 10.978 |
| ATOM | 3564 | HB2     | ARG | A 218 | 10.030 | 27.971 | 9.926  |
| ATOM | 3565 | HB3     | ARG | A 218 | 8.768  | 28.501 | 11.026 |
| ATOM | 3566 | CG      | ARG | A 218 | 10.731 | 29.223 | 11.531 |
| ATOM | 3567 | HG2     | ARG | A 218 | 10.461 | 29.430 | 12.566 |
| ATOM | 3568 | HG3     | ARG | A 218 | 11.762 | 28.879 | 11.499 |
| ATOM | 3569 | CD      | ARG | A 218 | 10.633 | 30.527 | 10.735 |
| ATOM | 3570 | HD2     | ARG | A 218 | 9.586  | 30.815 | 10.668 |
| ATOM | 3571 | HD3     | ARG | A 218 | 11.162 | 31.316 | 11.271 |
| ATOM | 3572 | NE      | ARG | A 218 | 11.186 | 30.394 | 9.377  |
| ATOM | 3573 | HE      | ARG | A 218 | 10.521 | 30.277 | 8.629  |
| ATOM | 3574 | CZ      | ARG | A 218 | 12.456 | 30.548 | 9.022  |
| ATOM | 3575 | NH1     | ARG | A 218 | 13.416 | 30.843 | 9.872  |
| ATOM | 3576 | HH11ARG | A   | 218   | 13.220 | 31.007 | 10.851 |
| ATOM | 3577 | HH12ARG | A   | 218   | 14.329 | 31.065 | 9.500  |
| ATOM | 3578 | NH2     | ARG | A 218 | 12.801 | 30.434 | 7.764  |
| ATOM | 3579 | HH21ARG | A   | 218   | 12.116 | 30.276 | 7.036  |
| ATOM | 3580 | HH22ARG | A   | 218   | 13.751 | 30.687 | 7.513  |
| ATOM | 3581 | C       | ARG | A 218 | 11.300 | 26.185 | 11.574 |
| ATOM | 3582 | O       | ARG | A 218 | 12.162 | 26.467 | 12.415 |
| ATOM | 3583 | N       | PRO | A 219 | 11.579 | 25.413 | 10.506 |
| ATOM | 3584 | CD      | PRO | A 219 | 10.651 | 24.959 | 9.480  |
| ATOM | 3585 | HD2     | PRO | A 219 | 9.951  | 25.739 | 9.180  |

|      |      |      |     |   |     |        |        |        |
|------|------|------|-----|---|-----|--------|--------|--------|
| ATOM | 3586 | HD3  | PRO | A | 219 | 10.110 | 24.087 | 9.852  |
| ATOM | 3587 | CG   | PRO | A | 219 | 11.525 | 24.562 | 8.294  |
| ATOM | 3588 | HG2  | PRO | A | 219 | 11.735 | 25.453 | 7.702  |
| ATOM | 3589 | HG3  | PRO | A | 219 | 11.056 | 23.791 | 7.683  |
| ATOM | 3590 | CB   | PRO | A | 219 | 12.809 | 24.071 | 8.962  |
| ATOM | 3591 | HB2  | PRO | A | 219 | 13.669 | 24.164 | 8.297  |
| ATOM | 3592 | HB3  | PRO | A | 219 | 12.681 | 23.034 | 9.275  |
| ATOM | 3593 | CA   | PRO | A | 219 | 12.931 | 24.971 | 10.197 |
| ATOM | 3594 | HA   | PRO | A | 219 | 13.326 | 24.390 | 11.032 |
| ATOM | 3595 | C    | PRO | A | 219 | 13.826 | 26.188 | 9.941  |
| ATOM | 3596 | O    | PRO | A | 219 | 13.450 | 27.103 | 9.213  |
| ATOM | 3597 | N    | ILE | A | 220 | 15.017 | 26.190 | 10.543 |
| ATOM | 3598 | H    | ILE | A | 220 | 15.229 | 25.428 | 11.173 |
| ATOM | 3599 | CA   | ILE | A | 220 | 16.068 | 27.202 | 10.314 |
| ATOM | 3600 | HA   | ILE | A | 220 | 15.603 | 28.190 | 10.286 |
| ATOM | 3601 | CB   | ILE | A | 220 | 17.072 | 27.176 | 11.500 |
| ATOM | 3602 | HB   | ILE | A | 220 | 16.529 | 27.515 | 12.383 |
| ATOM | 3603 | CG2  | ILE | A | 220 | 17.583 | 25.755 | 11.819 |
| ATOM | 3604 | HG21 | ILE | A | 220 | 18.021 | 25.300 | 10.936 |
| ATOM | 3605 | HG22 | ILE | A | 220 | 18.337 | 25.796 | 12.605 |
| ATOM | 3606 | HG23 | ILE | A | 220 | 16.770 | 25.123 | 12.177 |
| ATOM | 3607 | CG1  | ILE | A | 220 | 18.286 | 28.119 | 11.336 |
| ATOM | 3608 | HG12 | ILE | A | 220 | 18.935 | 28.006 | 12.206 |
| ATOM | 3609 | HG13 | ILE | A | 220 | 18.867 | 27.837 | 10.457 |
| ATOM | 3610 | CD1  | ILE | A | 220 | 17.909 | 29.602 | 11.239 |
| ATOM | 3611 | HD11 | ILE | A | 220 | 18.820 | 30.201 | 11.199 |
| ATOM | 3612 | HD12 | ILE | A | 220 | 17.328 | 29.793 | 10.337 |
| ATOM | 3613 | HD13 | ILE | A | 220 | 17.330 | 29.898 | 12.114 |
| ATOM | 3614 | C    | ILE | A | 220 | 16.747 | 27.027 | 8.943  |
| ATOM | 3615 | O    | ILE | A | 220 | 17.124 | 28.008 | 8.300  |
| ATOM | 3616 | N    | PHE | A | 221 | 16.839 | 25.785 | 8.456  |
| ATOM | 3617 | H    | PHE | A | 221 | 16.495 | 25.030 | 9.027  |
| ATOM | 3618 | CA   | PHE | A | 221 | 17.482 | 25.445 | 7.186  |
| ATOM | 3619 | HA   | PHE | A | 221 | 17.824 | 26.359 | 6.717  |
| ATOM | 3620 | CB   | PHE | A | 221 | 18.746 | 24.608 | 7.488  |
| ATOM | 3621 | HB2  | PHE | A | 221 | 18.450 | 23.672 | 7.967  |
| ATOM | 3622 | HB3  | PHE | A | 221 | 19.224 | 24.352 | 6.547  |
| ATOM | 3623 | CG   | PHE | A | 221 | 19.804 | 25.301 | 8.338  |
| ATOM | 3624 | CD1  | PHE | A | 221 | 20.413 | 26.489 | 7.889  |
| ATOM | 3625 | HD1  | PHE | A | 221 | 20.137 | 26.916 | 6.940  |
| ATOM | 3626 | CE1  | PHE | A | 221 | 21.388 | 27.133 | 8.668  |
| ATOM | 3627 | HE1  | PHE | A | 221 | 21.838 | 28.048 | 8.316  |
| ATOM | 3628 | CZ   | PHE | A | 221 | 21.772 | 26.590 | 9.905  |
| ATOM | 3629 | HZ   | PHE | A | 221 | 22.520 | 27.087 | 10.506 |
| ATOM | 3630 | CE2  | PHE | A | 221 | 21.182 | 25.396 | 10.352 |
| ATOM | 3631 | HE2  | PHE | A | 221 | 21.482 | 24.970 | 11.296 |
| ATOM | 3632 | CD2  | PHE | A | 221 | 20.207 | 24.749 | 9.570  |
| ATOM | 3633 | HD2  | PHE | A | 221 | 19.764 | 23.829 | 9.924  |
| ATOM | 3634 | C    | PHE | A | 221 | 16.500 | 24.788 | 6.179  |
| ATOM | 3635 | O    | PHE | A | 221 | 16.622 | 23.592 | 5.913  |
| ATOM | 3636 | N    | PRO | A | 222 | 15.515 | 25.524 | 5.613  |
| ATOM | 3637 | CD   | PRO | A | 222 | 15.102 | 26.867 | 6.010  |
| ATOM | 3638 | HD2  | PRO | A | 222 | 15.884 | 27.599 | 5.819  |
| ATOM | 3639 | HD3  | PRO | A | 222 | 14.832 | 26.860 | 7.065  |
| ATOM | 3640 | CG   | PRO | A | 222 | 13.850 | 27.206 | 5.199  |
| ATOM | 3641 | HG2  | PRO | A | 222 | 14.127 | 27.728 | 4.282  |
| ATOM | 3642 | HG3  | PRO | A | 222 | 13.142 | 27.801 | 5.778  |

|      |      |     |     |   |     |        |        |        |
|------|------|-----|-----|---|-----|--------|--------|--------|
| ATOM | 3643 | CB  | PRO | A | 222 | 13.287 | 25.829 | 4.861  |
| ATOM | 3644 | HB2 | PRO | A | 222 | 12.618 | 25.850 | 3.999  |
| ATOM | 3645 | HB3 | PRO | A | 222 | 12.752 | 25.434 | 5.720  |
| ATOM | 3646 | CA  | PRO | A | 222 | 14.555 | 24.997 | 4.639  |
| ATOM | 3647 | HA  | PRO | A | 222 | 14.329 | 23.958 | 4.871  |
| ATOM | 3648 | C   | PRO | A | 222 | 15.085 | 25.066 | 3.190  |
| ATOM | 3649 | O   | PRO | A | 222 | 14.450 | 25.659 | 2.318  |
| ATOM | 3650 | N   | GLY | A | 223 | 16.253 | 24.472 | 2.911  |
| ATOM | 3651 | H   | GLY | A | 223 | 16.766 | 24.019 | 3.658  |
| ATOM | 3652 | CA  | GLY | A | 223 | 16.880 | 24.509 | 1.580  |
| ATOM | 3653 | HA2 | GLY | A | 223 | 16.994 | 25.551 | 1.280  |
| ATOM | 3654 | HA3 | GLY | A | 223 | 17.871 | 24.058 | 1.627  |
| ATOM | 3655 | C   | GLY | A | 223 | 16.072 | 23.791 | 0.489  |
| ATOM | 3656 | O   | GLY | A | 223 | 15.431 | 22.766 | 0.732  |
| ATOM | 3657 | N   | LYS | A | 224 | 16.128 | 24.307 | -0.742 |
| ATOM | 3658 | H   | LYS | A | 224 | 16.713 | 25.125 | -0.883 |
| ATOM | 3659 | CA  | LYS | A | 224 | 15.438 | 23.751 | -1.918 |
| ATOM | 3660 | HA  | LYS | A | 224 | 14.380 | 23.639 | -1.685 |
| ATOM | 3661 | CB  | LYS | A | 224 | 15.587 | 24.749 | -3.084 |
| ATOM | 3662 | HB2 | LYS | A | 224 | 15.193 | 25.715 | -2.762 |
| ATOM | 3663 | HB3 | LYS | A | 224 | 16.648 | 24.862 | -3.319 |
| ATOM | 3664 | CG  | LYS | A | 224 | 14.841 | 24.294 | -4.353 |
| ATOM | 3665 | HG2 | LYS | A | 224 | 15.189 | 23.303 | -4.647 |
| ATOM | 3666 | HG3 | LYS | A | 224 | 13.772 | 24.232 | -4.148 |
| ATOM | 3667 | CD  | LYS | A | 224 | 15.083 | 25.232 | -5.538 |
| ATOM | 3668 | HD2 | LYS | A | 224 | 16.156 | 25.378 | -5.661 |
| ATOM | 3669 | HD3 | LYS | A | 224 | 14.706 | 24.756 | -6.444 |
| ATOM | 3670 | CE  | LYS | A | 224 | 14.385 | 26.582 | -5.363 |
| ATOM | 3671 | HE2 | LYS | A | 224 | 13.302 | 26.428 | -5.385 |
| ATOM | 3672 | HE3 | LYS | A | 224 | 14.653 | 27.008 | -4.392 |
| ATOM | 3673 | NZ  | LYS | A | 224 | 14.783 | 27.521 | -6.431 |
| ATOM | 3674 | HZ1 | LYS | A | 224 | 15.751 | 27.799 | -6.312 |
| ATOM | 3675 | HZ2 | LYS | A | 224 | 14.725 | 27.085 | -7.348 |
| ATOM | 3676 | HZ3 | LYS | A | 224 | 14.200 | 28.351 | -6.411 |
| ATOM | 3677 | C   | LYS | A | 224 | 15.964 | 22.358 | -2.303 |
| ATOM | 3678 | O   | LYS | A | 224 | 15.177 | 21.479 | -2.647 |
| ATOM | 3679 | N   | HIE | A | 225 | 17.280 | 22.161 | -2.203 |
| ATOM | 3680 | H   | HIE | A | 225 | 17.835 | 22.942 | -1.882 |
| ATOM | 3681 | CA  | HIE | A | 225 | 18.015 | 20.923 | -2.492 |
| ATOM | 3682 | HA  | HIE | A | 225 | 17.441 | 20.081 | -2.116 |
| ATOM | 3683 | CB  | HIE | A | 225 | 18.158 | 20.740 | -4.012 |
| ATOM | 3684 | HB2 | HIE | A | 225 | 18.672 | 19.800 | -4.207 |
| ATOM | 3685 | HB3 | HIE | A | 225 | 17.165 | 20.644 | -4.445 |
| ATOM | 3686 | CG  | HIE | A | 225 | 18.899 | 21.842 | -4.719 |
| ATOM | 3687 | ND1 | HIE | A | 225 | 20.259 | 22.128 | -4.578 |
| ATOM | 3688 | CE1 | HIE | A | 225 | 20.496 | 23.148 | -5.419 |
| ATOM | 3689 | HE1 | HIE | A | 225 | 21.456 | 23.626 | -5.555 |
| ATOM | 3690 | NE2 | HIE | A | 225 | 19.374 | 23.514 | -6.062 |
| ATOM | 3691 | HE2 | HIE | A | 225 | 19.306 | 24.254 | -6.749 |
| ATOM | 3692 | CD2 | HIE | A | 225 | 18.355 | 22.696 | -5.634 |
| ATOM | 3693 | HD2 | HIE | A | 225 | 17.328 | 22.704 | -5.968 |
| ATOM | 3694 | C   | HIE | A | 225 | 19.375 | 20.893 | -1.766 |
| ATOM | 3695 | O   | HIE | A | 225 | 19.799 | 21.910 | -1.216 |
| ATOM | 3696 | N   | TYR | A | 226 | 20.072 | 19.755 | -1.762 |
| ATOM | 3697 | H   | TYR | A | 226 | 19.596 | 18.939 | -2.152 |
| ATOM | 3698 | CA  | TYR | A | 226 | 21.358 | 19.534 | -1.070 |
| ATOM | 3699 | HA  | TYR | A | 226 | 21.151 | 19.464 | -0.001 |

|      |      |      |     |   |     |        |        |        |
|------|------|------|-----|---|-----|--------|--------|--------|
| ATOM | 3700 | CB   | TYR | A | 226 | 21.927 | 18.173 | -1.513 |
| ATOM | 3701 | HB2  | TYR | A | 226 | 22.788 | 17.936 | -0.888 |
| ATOM | 3702 | HB3  | TYR | A | 226 | 21.179 | 17.403 | -1.332 |
| ATOM | 3703 | CG   | TYR | A | 226 | 22.344 | 18.110 | -2.972 |
| ATOM | 3704 | CD1  | TYR | A | 226 | 21.369 | 17.952 | -3.974 |
| ATOM | 3705 | HD1  | TYR | A | 226 | 20.335 | 17.795 | -3.700 |
| ATOM | 3706 | CE1  | TYR | A | 226 | 21.727 | 18.005 | -5.332 |
| ATOM | 3707 | HE1  | TYR | A | 226 | 20.966 | 17.895 | -6.091 |
| ATOM | 3708 | CZ   | TYR | A | 226 | 23.078 | 18.191 | -5.697 |
| ATOM | 3709 | OH   | TYR | A | 226 | 23.412 | 18.268 | -7.015 |
| ATOM | 3710 | HH   | TYR | A | 226 | 22.630 | 18.261 | -7.575 |
| ATOM | 3711 | CE2  | TYR | A | 226 | 24.066 | 18.306 | -4.693 |
| ATOM | 3712 | HE2  | TYR | A | 226 | 25.102 | 18.437 | -4.970 |
| ATOM | 3713 | CD2  | TYR | A | 226 | 23.697 | 18.272 | -3.333 |
| ATOM | 3714 | HD2  | TYR | A | 226 | 24.455 | 18.382 | -2.570 |
| ATOM | 3715 | C    | TYR | A | 226 | 22.420 | 20.649 | -1.244 |
| ATOM | 3716 | O    | TYR | A | 226 | 23.086 | 21.007 | -0.270 |
| ATOM | 3717 | N    | LEU | A | 227 | 22.577 | 21.230 | -2.443 |
| ATOM | 3718 | H    | LEU | A | 227 | 21.992 | 20.915 | -3.207 |
| ATOM | 3719 | CA   | LEU | A | 227 | 23.598 | 22.256 | -2.720 |
| ATOM | 3720 | HA   | LEU | A | 227 | 24.439 | 22.075 | -2.053 |
| ATOM | 3721 | CB   | LEU | A | 227 | 24.070 | 22.092 | -4.177 |
| ATOM | 3722 | HB2  | LEU | A | 227 | 24.159 | 21.031 | -4.408 |
| ATOM | 3723 | HB3  | LEU | A | 227 | 23.305 | 22.505 | -4.833 |
| ATOM | 3724 | CG   | LEU | A | 227 | 25.423 | 22.765 | -4.491 |
| ATOM | 3725 | HG   | LEU | A | 227 | 25.391 | 23.808 | -4.180 |
| ATOM | 3726 | CD1  | LEU | A | 227 | 26.588 | 22.070 | -3.767 |
| ATOM | 3727 | HD11 | LEU | A | 227 | 26.497 | 22.200 | -2.689 |
| ATOM | 3728 | HD12 | LEU | A | 227 | 26.600 | 21.005 | -4.004 |
| ATOM | 3729 | HD13 | LEU | A | 227 | 27.533 | 22.513 | -4.079 |
| ATOM | 3730 | CD2  | LEU | A | 227 | 25.671 | 22.732 | -6.006 |
| ATOM | 3731 | HD21 | LEU | A | 227 | 25.712 | 21.701 | -6.362 |
| ATOM | 3732 | HD22 | LEU | A | 227 | 24.869 | 23.259 | -6.523 |
| ATOM | 3733 | HD23 | LEU | A | 227 | 26.615 | 23.228 | -6.236 |
| ATOM | 3734 | C    | LEU | A | 227 | 23.114 | 23.687 | -2.431 |
| ATOM | 3735 | O    | LEU | A | 227 | 23.914 | 24.555 | -2.085 |
| ATOM | 3736 | N    | ASP | A | 228 | 21.808 | 23.931 | -2.525 |
| ATOM | 3737 | H    | ASP | A | 228 | 21.211 | 23.190 | -2.873 |
| ATOM | 3738 | CA   | ASP | A | 228 | 21.162 | 25.157 | -2.048 |
| ATOM | 3739 | HA   | ASP | A | 228 | 21.720 | 26.024 | -2.402 |
| ATOM | 3740 | CB   | ASP | A | 228 | 19.750 | 25.212 | -2.636 |
| ATOM | 3741 | HB2  | ASP | A | 228 | 19.820 | 25.259 | -3.723 |
| ATOM | 3742 | HB3  | ASP | A | 228 | 19.206 | 24.305 | -2.368 |
| ATOM | 3743 | CG   | ASP | A | 228 | 18.971 | 26.427 | -2.147 |
| ATOM | 3744 | OD1  | ASP | A | 228 | 19.151 | 27.525 | -2.721 |
| ATOM | 3745 | OD2  | ASP | A | 228 | 18.104 | 26.254 | -1.265 |
| ATOM | 3746 | C    | ASP | A | 228 | 21.120 | 25.212 | -0.511 |
| ATOM | 3747 | O    | ASP | A | 228 | 21.276 | 26.275 | 0.077  |
| ATOM | 3748 | N    | GLN | A | 229 | 20.976 | 24.056 | 0.137  |
| ATOM | 3749 | H    | GLN | A | 229 | 20.794 | 23.231 | -0.423 |
| ATOM | 3750 | CA   | GLN | A | 229 | 21.071 | 23.893 | 1.583  |
| ATOM | 3751 | HA   | GLN | A | 229 | 20.405 | 24.610 | 2.065  |
| ATOM | 3752 | CB   | GLN | A | 229 | 20.628 | 22.458 | 1.924  |
| ATOM | 3753 | HB2  | GLN | A | 229 | 19.622 | 22.288 | 1.538  |
| ATOM | 3754 | HB3  | GLN | A | 229 | 21.297 | 21.759 | 1.425  |
| ATOM | 3755 | CG   | GLN | A | 229 | 20.638 | 22.123 | 3.421  |
| ATOM | 3756 | HG2  | GLN | A | 229 | 20.541 | 21.041 | 3.522  |

|      |      |      |     |   |     |        |        |        |
|------|------|------|-----|---|-----|--------|--------|--------|
| ATOM | 3757 | HG3  | GLN | A | 229 | 21.588 | 22.403 | 3.871  |
| ATOM | 3758 | CD   | GLN | A | 229 | 19.504 | 22.787 | 4.197  |
| ATOM | 3759 | OE1  | GLN | A | 229 | 19.211 | 23.966 | 4.071  |
| ATOM | 3760 | NE2  | GLN | A | 229 | 18.794 | 22.044 | 5.012  |
| ATOM | 3761 | HE21 | GLN | A | 229 | 18.046 | 22.510 | 5.509  |
| ATOM | 3762 | HE22 | GLN | A | 229 | 18.905 | 21.038 | 5.022  |
| ATOM | 3763 | C    | GLN | A | 229 | 22.493 | 24.186 | 2.074  |
| ATOM | 3764 | O    | GLN | A | 229 | 22.656 | 24.884 | 3.071  |
| ATOM | 3765 | N    | LEU | A | 230 | 23.528 | 23.710 | 1.367  |
| ATOM | 3766 | H    | LEU | A | 230 | 23.344 | 23.109 | 0.573  |
| ATOM | 3767 | CA   | LEU | A | 230 | 24.918 | 24.046 | 1.684  |
| ATOM | 3768 | HA   | LEU | A | 230 | 25.103 | 23.764 | 2.722  |
| ATOM | 3769 | CB   | LEU | A | 230 | 25.848 | 23.240 | 0.754  |
| ATOM | 3770 | HB2  | LEU | A | 230 | 25.542 | 22.192 | 0.755  |
| ATOM | 3771 | HB3  | LEU | A | 230 | 25.731 | 23.620 | -0.263 |
| ATOM | 3772 | CG   | LEU | A | 230 | 27.338 | 23.318 | 1.150  |
| ATOM | 3773 | HG   | LEU | A | 230 | 27.608 | 24.359 | 1.323  |
| ATOM | 3774 | CD1  | LEU | A | 230 | 27.641 | 22.517 | 2.426  |
| ATOM | 3775 | HD11 | LEU | A | 230 | 28.695 | 22.619 | 2.682  |
| ATOM | 3776 | HD12 | LEU | A | 230 | 27.049 | 22.887 | 3.263  |
| ATOM | 3777 | HD13 | LEU | A | 230 | 27.418 | 21.461 | 2.268  |
| ATOM | 3778 | CD2  | LEU | A | 230 | 28.211 | 22.794 | 0.002  |
| ATOM | 3779 | HD21 | LEU | A | 230 | 28.047 | 23.396 | -0.892 |
| ATOM | 3780 | HD22 | LEU | A | 230 | 29.264 | 22.865 | 0.277  |
| ATOM | 3781 | HD23 | LEU | A | 230 | 27.964 | 21.754 | -0.216 |
| ATOM | 3782 | C    | LEU | A | 230 | 25.149 | 25.564 | 1.581  |
| ATOM | 3783 | O    | LEU | A | 230 | 25.707 | 26.157 | 2.504  |
| ATOM | 3784 | N    | ASN | A | 231 | 24.666 | 26.195 | 0.504  |
| ATOM | 3785 | H    | ASN | A | 231 | 24.232 | 25.630 | -0.215 |
| ATOM | 3786 | CA   | ASN | A | 231 | 24.689 | 27.650 | 0.308  |
| ATOM | 3787 | HA   | ASN | A | 231 | 25.727 | 27.988 | 0.324  |
| ATOM | 3788 | CB   | ASN | A | 231 | 24.098 | 27.951 | -1.078 |
| ATOM | 3789 | HB2  | ASN | A | 231 | 24.705 | 27.446 | -1.825 |
| ATOM | 3790 | HB3  | ASN | A | 231 | 23.087 | 27.553 | -1.144 |
| ATOM | 3791 | CG   | ASN | A | 231 | 24.041 | 29.439 | -1.401 |
| ATOM | 3792 | OD1  | ASN | A | 231 | 23.065 | 30.117 | -1.099 |
| ATOM | 3793 | ND2  | ASN | A | 231 | 25.060 | 29.985 | -2.035 |
| ATOM | 3794 | HD21 | ASN | A | 231 | 24.996 | 30.938 | -2.369 |
| ATOM | 3795 | HD22 | ASN | A | 231 | 25.836 | 29.398 | -2.319 |
| ATOM | 3796 | C    | ASN | A | 231 | 23.931 | 28.411 | 1.414  |
| ATOM | 3797 | O    | ASN | A | 231 | 24.417 | 29.430 | 1.897  |
| ATOM | 3798 | N    | HIE | A | 232 | 22.769 | 27.915 | 1.849  |
| ATOM | 3799 | H    | HIE | A | 232 | 22.390 | 27.099 | 1.379  |
| ATOM | 3800 | CA   | HIE | A | 232 | 21.963 | 28.511 | 2.917  |
| ATOM | 3801 | HA   | HIE | A | 232 | 21.868 | 29.579 | 2.724  |
| ATOM | 3802 | CB   | HIE | A | 232 | 20.559 | 27.890 | 2.860  |
| ATOM | 3803 | HB2  | HIE | A | 232 | 20.141 | 28.022 | 1.864  |
| ATOM | 3804 | HB3  | HIE | A | 232 | 20.636 | 26.820 | 3.045  |
| ATOM | 3805 | CG   | HIE | A | 232 | 19.600 | 28.484 | 3.852  |
| ATOM | 3806 | ND1  | HIE | A | 232 | 19.312 | 29.841 | 3.999  |
| ATOM | 3807 | CE1  | HIE | A | 232 | 18.486 | 29.918 | 5.053  |
| ATOM | 3808 | HE1  | HIE | A | 232 | 18.092 | 30.840 | 5.454  |
| ATOM | 3809 | NE2  | HIE | A | 232 | 18.257 | 28.703 | 5.578  |
| ATOM | 3810 | HE2  | HIE | A | 232 | 17.751 | 28.524 | 6.445  |
| ATOM | 3811 | CD2  | HIE | A | 232 | 18.930 | 27.780 | 4.805  |
| ATOM | 3812 | HD2  | HIE | A | 232 | 18.983 | 26.709 | 4.940  |
| ATOM | 3813 | C    | HIE | A | 232 | 22.609 | 28.358 | 4.308  |

|      |      |      |     |   |     |        |        |        |
|------|------|------|-----|---|-----|--------|--------|--------|
| ATOM | 3814 | O    | HIE | A | 232 | 22.574 | 29.287 | 5.114  |
| ATOM | 3815 | N    | ILE | A | 233 | 23.263 | 27.222 | 4.578  |
| ATOM | 3816 | H    | ILE | A | 233 | 23.200 | 26.470 | 3.891  |
| ATOM | 3817 | CA   | ILE | A | 233 | 24.084 | 27.021 | 5.784  |
| ATOM | 3818 | HA   | ILE | A | 233 | 23.492 | 27.297 | 6.657  |
| ATOM | 3819 | CB   | ILE | A | 233 | 24.490 | 25.533 | 5.927  |
| ATOM | 3820 | HB   | ILE | A | 233 | 24.896 | 25.189 | 4.974  |
| ATOM | 3821 | CG2  | ILE | A | 233 | 25.571 | 25.362 | 7.010  |
| ATOM | 3822 | HG21 | ILE | A | 233 | 25.811 | 24.311 | 7.153  |
| ATOM | 3823 | HG22 | ILE | A | 233 | 26.491 | 25.870 | 6.721  |
| ATOM | 3824 | HG23 | ILE | A | 233 | 25.210 | 25.776 | 7.950  |
| ATOM | 3825 | CG1  | ILE | A | 233 | 23.249 | 24.680 | 6.291  |
| ATOM | 3826 | HG12 | ILE | A | 233 | 22.949 | 24.899 | 7.316  |
| ATOM | 3827 | HG13 | ILE | A | 233 | 22.413 | 24.951 | 5.647  |
| ATOM | 3828 | CD1  | ILE | A | 233 | 23.463 | 23.166 | 6.152  |
| ATOM | 3829 | HD11 | ILE | A | 233 | 22.513 | 22.656 | 6.310  |
| ATOM | 3830 | HD12 | ILE | A | 233 | 23.831 | 22.930 | 5.153  |
| ATOM | 3831 | HD13 | ILE | A | 233 | 24.171 | 22.807 | 6.898  |
| ATOM | 3832 | C    | ILE | A | 233 | 25.273 | 27.990 | 5.785  |
| ATOM | 3833 | O    | ILE | A | 233 | 25.383 | 28.781 | 6.720  |
| ATOM | 3834 | N    | LEU | A | 234 | 26.097 | 28.007 | 4.728  |
| ATOM | 3835 | H    | LEU | A | 234 | 25.933 | 27.341 | 3.980  |
| ATOM | 3836 | CA   | LEU | A | 234 | 27.222 | 28.946 | 4.576  |
| ATOM | 3837 | HA   | LEU | A | 234 | 27.926 | 28.791 | 5.394  |
| ATOM | 3838 | CB   | LEU | A | 234 | 27.923 | 28.679 | 3.226  |
| ATOM | 3839 | HB2  | LEU | A | 234 | 27.158 | 28.621 | 2.451  |
| ATOM | 3840 | HB3  | LEU | A | 234 | 28.566 | 29.526 | 2.983  |
| ATOM | 3841 | CG   | LEU | A | 234 | 28.783 | 27.397 | 3.195  |
| ATOM | 3842 | HG   | LEU | A | 234 | 28.257 | 26.594 | 3.713  |
| ATOM | 3843 | CD1  | LEU | A | 234 | 29.029 | 26.952 | 1.745  |
| ATOM | 3844 | HD11 | LEU | A | 234 | 29.598 | 26.022 | 1.737  |
| ATOM | 3845 | HD12 | LEU | A | 234 | 28.078 | 26.782 | 1.241  |
| ATOM | 3846 | HD13 | LEU | A | 234 | 29.585 | 27.718 | 1.204  |
| ATOM | 3847 | CD2  | LEU | A | 234 | 30.145 | 27.619 | 3.873  |
| ATOM | 3848 | HD21 | LEU | A | 234 | 30.729 | 28.352 | 3.313  |
| ATOM | 3849 | HD22 | LEU | A | 234 | 30.009 | 27.984 | 4.887  |
| ATOM | 3850 | HD23 | LEU | A | 234 | 30.696 | 26.679 | 3.910  |
| ATOM | 3851 | C    | LEU | A | 234 | 26.762 | 30.409 | 4.670  |
| ATOM | 3852 | O    | LEU | A | 234 | 27.421 | 31.222 | 5.312  |
| ATOM | 3853 | N    | GLY | A | 235 | 25.603 | 30.737 | 4.092  |
| ATOM | 3854 | H    | GLY | A | 235 | 25.137 | 30.021 | 3.546  |
| ATOM | 3855 | CA   | GLY | A | 235 | 24.983 | 32.065 | 4.118  |
| ATOM | 3856 | HA2  | GLY | A | 235 | 25.732 | 32.818 | 3.885  |
| ATOM | 3857 | HA3  | GLY | A | 235 | 24.191 | 32.100 | 3.370  |
| ATOM | 3858 | C    | GLY | A | 235 | 24.367 | 32.456 | 5.462  |
| ATOM | 3859 | O    | GLY | A | 235 | 23.915 | 33.591 | 5.597  |
| ATOM | 3860 | N    | ILE | A | 236 | 24.341 | 31.563 | 6.454  |
| ATOM | 3861 | H    | ILE | A | 236 | 24.676 | 30.625 | 6.250  |
| ATOM | 3862 | CA   | ILE | A | 236 | 23.928 | 31.879 | 7.830  |
| ATOM | 3863 | HA   | ILE | A | 236 | 23.632 | 32.926 | 7.896  |
| ATOM | 3864 | CB   | ILE | A | 236 | 22.700 | 31.017 | 8.221  |
| ATOM | 3865 | HB   | ILE | A | 236 | 22.872 | 29.995 | 7.881  |
| ATOM | 3866 | CG2  | ILE | A | 236 | 22.470 | 30.986 | 9.742  |
| ATOM | 3867 | HG21 | ILE | A | 236 | 21.654 | 30.312 | 9.999  |
| ATOM | 3868 | HG22 | ILE | A | 236 | 23.349 | 30.612 | 10.249 |
| ATOM | 3869 | HG23 | ILE | A | 236 | 22.252 | 31.988 | 10.105 |
| ATOM | 3870 | CG1  | ILE | A | 236 | 21.445 | 31.589 | 7.518  |

|      |      |         |   |     |        |        |        |
|------|------|---------|---|-----|--------|--------|--------|
| ATOM | 3871 | HG12ILE | A | 236 | 21.310 | 32.628 | 7.823  |
| ATOM | 3872 | HG13ILE | A | 236 | 21.603 | 31.572 | 6.439  |
| ATOM | 3873 | CD1 ILE | A | 236 | 20.139 | 30.839 | 7.809  |
| ATOM | 3874 | HD11ILE | A | 236 | 20.230 | 29.795 | 7.509  |
| ATOM | 3875 | HD12ILE | A | 236 | 19.873 | 30.897 | 8.863  |
| ATOM | 3876 | HD13ILE | A | 236 | 19.334 | 31.309 | 7.249  |
| ATOM | 3877 | C ILE   | A | 236 | 25.117 | 31.754 | 8.787  |
| ATOM | 3878 | O ILE   | A | 236 | 25.406 | 32.710 | 9.502  |
| ATOM | 3879 | N LEU   | A | 237 | 25.841 | 30.633 | 8.786  |
| ATOM | 3880 | H LEU   | A | 237 | 25.600 | 29.902 | 8.125  |
| ATOM | 3881 | CA LEU  | A | 237 | 26.966 | 30.385 | 9.695  |
| ATOM | 3882 | HA LEU  | A | 237 | 26.713 | 30.769 | 10.685 |
| ATOM | 3883 | CB LEU  | A | 237 | 27.215 | 28.870 | 9.779  |
| ATOM | 3884 | HB2 LEU | A | 237 | 27.541 | 28.539 | 8.798  |
| ATOM | 3885 | HB3 LEU | A | 237 | 28.036 | 28.707 | 10.481 |
| ATOM | 3886 | CG LEU  | A | 237 | 26.030 | 27.980 | 10.193 |
| ATOM | 3887 | HG LEU  | A | 237 | 25.293 | 27.960 | 9.389  |
| ATOM | 3888 | CD1 LEU | A | 237 | 26.538 | 26.547 | 10.409 |
| ATOM | 3889 | HD11LEU | A | 237 | 25.721 | 25.911 | 10.741 |
| ATOM | 3890 | HD12LEU | A | 237 | 26.930 | 26.156 | 9.472  |
| ATOM | 3891 | HD13LEU | A | 237 | 27.336 | 26.526 | 11.150 |
| ATOM | 3892 | CD2 LEU | A | 237 | 25.339 | 28.491 | 11.459 |
| ATOM | 3893 | HD21LEU | A | 237 | 24.726 | 29.348 | 11.217 |
| ATOM | 3894 | HD22LEU | A | 237 | 24.698 | 27.715 | 11.874 |
| ATOM | 3895 | HD23LEU | A | 237 | 26.070 | 28.816 | 12.192 |
| ATOM | 3896 | C LEU   | A | 237 | 28.267 | 31.088 | 9.271  |
| ATOM | 3897 | O LEU   | A | 237 | 29.228 | 31.103 | 10.040 |
| ATOM | 3898 | N GLY   | A | 238 | 28.326 | 31.626 | 8.050  |
| ATOM | 3899 | H GLY   | A | 238 | 27.527 | 31.509 | 7.439  |
| ATOM | 3900 | CA GLY  | A | 238 | 29.522 | 32.222 | 7.456  |
| ATOM | 3901 | HA2 GLY | A | 238 | 29.209 | 32.874 | 6.644  |
| ATOM | 3902 | HA3 GLY | A | 238 | 30.054 | 32.809 | 8.203  |
| ATOM | 3903 | C GLY   | A | 238 | 30.487 | 31.182 | 6.877  |
| ATOM | 3904 | O GLY   | A | 238 | 30.324 | 29.975 | 7.056  |
| ATOM | 3905 | N SER   | A | 239 | 31.514 | 31.656 | 6.176  |
| ATOM | 3906 | H SER   | A | 239 | 31.566 | 32.653 | 6.016  |
| ATOM | 3907 | CA SER  | A | 239 | 32.533 | 30.817 | 5.526  |
| ATOM | 3908 | HA SER  | A | 239 | 32.027 | 30.083 | 4.901  |
| ATOM | 3909 | CB SER  | A | 239 | 33.381 | 31.705 | 4.619  |
| ATOM | 3910 | HB2 SER | A | 239 | 33.855 | 32.478 | 5.216  |
| ATOM | 3911 | HB3 SER | A | 239 | 34.168 | 31.114 | 4.156  |
| ATOM | 3912 | OG SER  | A | 239 | 32.595 | 32.300 | 3.612  |
| ATOM | 3913 | HG SER  | A | 239 | 33.023 | 32.049 | 2.760  |
| ATOM | 3914 | C SER   | A | 239 | 33.487 | 30.079 | 6.496  |
| ATOM | 3915 | O SER   | A | 239 | 33.660 | 30.514 | 7.642  |
| ATOM | 3916 | N PRO   | A | 240 | 34.159 | 28.997 | 6.048  |
| ATOM | 3917 | CD PRO  | A | 240 | 33.906 | 28.281 | 4.802  |
| ATOM | 3918 | HD2 PRO | A | 240 | 34.005 | 28.936 | 3.938  |
| ATOM | 3919 | HD3 PRO | A | 240 | 32.910 | 27.830 | 4.830  |
| ATOM | 3920 | CG PRO  | A | 240 | 34.959 | 27.177 | 4.729  |
| ATOM | 3921 | HG2 PRO | A | 240 | 35.857 | 27.553 | 4.236  |
| ATOM | 3922 | HG3 PRO | A | 240 | 34.583 | 26.295 | 4.214  |
| ATOM | 3923 | CB PRO  | A | 240 | 35.261 | 26.887 | 6.196  |
| ATOM | 3924 | HB2 PRO | A | 240 | 36.246 | 26.439 | 6.331  |
| ATOM | 3925 | HB3 PRO | A | 240 | 34.493 | 26.232 | 6.608  |
| ATOM | 3926 | CA PRO  | A | 240 | 35.153 | 28.272 | 6.841  |
| ATOM | 3927 | HA PRO  | A | 240 | 34.806 | 28.157 | 7.861  |

|      |      |      |     |   |     |        |        |        |
|------|------|------|-----|---|-----|--------|--------|--------|
| ATOM | 3928 | C    | PRO | A | 240 | 36.510 | 28.979 | 6.881  |
| ATOM | 3929 | O    | PRO | A | 240 | 36.879 | 29.706 | 5.958  |
| ATOM | 3930 | N    | SER | A | 241 | 37.285 | 28.727 | 7.938  |
| ATOM | 3931 | H    | SER | A | 241 | 36.929 | 28.130 | 8.682  |
| ATOM | 3932 | CA   | SER | A | 241 | 38.715 | 29.068 | 7.980  |
| ATOM | 3933 | HA   | SER | A | 241 | 38.907 | 29.889 | 7.292  |
| ATOM | 3934 | CB   | SER | A | 241 | 39.094 | 29.550 | 9.387  |
| ATOM | 3935 | HB2  | SER | A | 241 | 40.037 | 30.092 | 9.330  |
| ATOM | 3936 | HB3  | SER | A | 241 | 38.329 | 30.241 | 9.743  |
| ATOM | 3937 | OG   | SER | A | 241 | 39.229 | 28.484 | 10.316 |
| ATOM | 3938 | HG   | SER | A | 241 | 38.366 | 28.011 | 10.385 |
| ATOM | 3939 | C    | SER | A | 241 | 39.610 | 27.900 | 7.525  |
| ATOM | 3940 | O    | SER | A | 241 | 39.148 | 26.765 | 7.400  |
| ATOM | 3941 | N    | GLN | A | 242 | 40.905 | 28.147 | 7.304  |
| ATOM | 3942 | H    | GLN | A | 242 | 41.240 | 29.098 | 7.412  |
| ATOM | 3943 | CA   | GLN | A | 242 | 41.858 | 27.117 | 6.860  |
| ATOM | 3944 | HA   | GLN | A | 242 | 41.537 | 26.723 | 5.898  |
| ATOM | 3945 | CB   | GLN | A | 242 | 43.258 | 27.739 | 6.708  |
| ATOM | 3946 | HB2  | GLN | A | 242 | 43.483 | 28.329 | 7.599  |
| ATOM | 3947 | HB3  | GLN | A | 242 | 43.999 | 26.943 | 6.651  |
| ATOM | 3948 | CG   | GLN | A | 242 | 43.428 | 28.632 | 5.466  |
| ATOM | 3949 | HG2  | GLN | A | 242 | 42.598 | 29.329 | 5.382  |
| ATOM | 3950 | HG3  | GLN | A | 242 | 44.334 | 29.218 | 5.611  |
| ATOM | 3951 | CD   | GLN | A | 242 | 43.566 | 27.867 | 4.145  |
| ATOM | 3952 | OE1  | GLN | A | 242 | 43.064 | 26.767 | 3.959  |
| ATOM | 3953 | NE2  | GLN | A | 242 | 44.264 | 28.408 | 3.170  |
| ATOM | 3954 | HE21 | GLN | A | 242 | 44.346 | 27.888 | 2.316  |
| ATOM | 3955 | HE22 | GLN | A | 242 | 44.697 | 29.310 | 3.280  |
| ATOM | 3956 | C    | GLN | A | 242 | 41.915 | 25.902 | 7.800  |
| ATOM | 3957 | O    | GLN | A | 242 | 42.173 | 24.792 | 7.336  |
| ATOM | 3958 | N    | GLU | A | 243 | 41.647 | 26.081 | 9.095  |
| ATOM | 3959 | H    | GLU | A | 243 | 41.433 | 27.018 | 9.419  |
| ATOM | 3960 | CA   | GLU | A | 243 | 41.596 | 24.987 | 10.073 |
| ATOM | 3961 | HA   | GLU | A | 243 | 42.444 | 24.318 | 9.919  |
| ATOM | 3962 | CB   | GLU | A | 243 | 41.698 | 25.591 | 11.479 |
| ATOM | 3963 | HB2  | GLU | A | 243 | 40.914 | 26.341 | 11.591 |
| ATOM | 3964 | HB3  | GLU | A | 243 | 41.536 | 24.807 | 12.213 |
| ATOM | 3965 | CG   | GLU | A | 243 | 43.064 | 26.229 | 11.767 |
| ATOM | 3966 | HG2  | GLU | A | 243 | 43.781 | 25.443 | 11.995 |
| ATOM | 3967 | HG3  | GLU | A | 243 | 43.416 | 26.769 | 10.888 |
| ATOM | 3968 | CD   | GLU | A | 243 | 42.988 | 27.209 | 12.934 |
| ATOM | 3969 | OE1  | GLU | A | 243 | 42.442 | 26.858 | 14.008 |
| ATOM | 3970 | OE2  | GLU | A | 243 | 43.395 | 28.372 | 12.729 |
| ATOM | 3971 | C    | GLU | A | 243 | 40.306 | 24.151 | 9.958  |
| ATOM | 3972 | O    | GLU | A | 243 | 40.334 | 22.928 | 10.121 |
| ATOM | 3973 | N    | ASP | A | 244 | 39.174 | 24.788 | 9.632  |
| ATOM | 3974 | H    | ASP | A | 244 | 39.239 | 25.769 | 9.389  |
| ATOM | 3975 | CA   | ASP | A | 244 | 37.886 | 24.110 | 9.432  |
| ATOM | 3976 | HA   | ASP | A | 244 | 37.743 | 23.379 | 10.230 |
| ATOM | 3977 | CB   | ASP | A | 244 | 36.726 | 25.115 | 9.478  |
| ATOM | 3978 | HB2  | ASP | A | 244 | 36.778 | 25.753 | 8.595  |
| ATOM | 3979 | HB3  | ASP | A | 244 | 35.784 | 24.565 | 9.432  |
| ATOM | 3980 | CG   | ASP | A | 244 | 36.723 | 26.002 | 10.720 |
| ATOM | 3981 | OD1  | ASP | A | 244 | 36.355 | 25.538 | 11.825 |
| ATOM | 3982 | OD2  | ASP | A | 244 | 36.992 | 27.215 | 10.566 |
| ATOM | 3983 | C    | ASP | A | 244 | 37.857 | 23.371 | 8.087  |
| ATOM | 3984 | O    | ASP | A | 244 | 37.300 | 22.277 | 7.991  |



|      |      |      |     |   |     |        |        |        |
|------|------|------|-----|---|-----|--------|--------|--------|
| ATOM | 3985 | N    | LEU | A | 245 | 38.509 | 23.939 | 7.063  |
| ATOM | 3986 | H    | LEU | A | 245 | 38.907 | 24.862 | 7.218  |
| ATOM | 3987 | CA   | LEU | A | 245 | 38.791 | 23.263 | 5.795  |
| ATOM | 3988 | HA   | LEU | A | 245 | 37.853 | 22.938 | 5.348  |
| ATOM | 3989 | CB   | LEU | A | 245 | 39.524 | 24.233 | 4.841  |
| ATOM | 3990 | HB2  | LEU | A | 245 | 40.390 | 24.644 | 5.359  |
| ATOM | 3991 | HB3  | LEU | A | 245 | 39.899 | 23.668 | 3.987  |
| ATOM | 3992 | CG   | LEU | A | 245 | 38.662 | 25.397 | 4.311  |
| ATOM | 3993 | HG   | LEU | A | 245 | 38.205 | 25.923 | 5.146  |
| ATOM | 3994 | CD1  | LEU | A | 245 | 39.529 | 26.397 | 3.538  |
| ATOM | 3995 | HD11 | LEU | A | 245 | 40.062 | 25.889 | 2.734  |
| ATOM | 3996 | HD12 | LEU | A | 245 | 38.904 | 27.185 | 3.115  |
| ATOM | 3997 | HD13 | LEU | A | 245 | 40.249 | 26.862 | 4.206  |
| ATOM | 3998 | CD2  | LEU | A | 245 | 37.548 | 24.906 | 3.381  |
| ATOM | 3999 | HD21 | LEU | A | 245 | 37.003 | 25.764 | 2.991  |
| ATOM | 4000 | HD22 | LEU | A | 245 | 37.981 | 24.355 | 2.548  |
| ATOM | 4001 | HD23 | LEU | A | 245 | 36.850 | 24.268 | 3.922  |
| ATOM | 4002 | C    | LEU | A | 245 | 39.610 | 21.992 | 6.048  |
| ATOM | 4003 | O    | LEU | A | 245 | 39.218 | 20.912 | 5.605  |
| ATOM | 4004 | N    | ASN | A | 246 | 40.701 | 22.097 | 6.816  |
| ATOM | 4005 | H    | ASN | A | 246 | 40.957 | 23.014 | 7.166  |
| ATOM | 4006 | CA   | ASN | A | 246 | 41.562 | 20.965 | 7.163  |
| ATOM | 4007 | HA   | ASN | A | 246 | 41.981 | 20.568 | 6.239  |
| ATOM | 4008 | CB   | ASN | A | 246 | 42.731 | 21.475 | 8.019  |
| ATOM | 4009 | HB2  | ASN | A | 246 | 43.237 | 22.285 | 7.496  |
| ATOM | 4010 | HB3  | ASN | A | 246 | 42.360 | 21.866 | 8.962  |
| ATOM | 4011 | CG   | ASN | A | 246 | 43.736 | 20.370 | 8.312  |
| ATOM | 4012 | OD1  | ASN | A | 246 | 43.571 | 19.592 | 9.242  |
| ATOM | 4013 | ND2  | ASN | A | 246 | 44.799 | 20.258 | 7.542  |
| ATOM | 4014 | HD21 | ASN | A | 246 | 45.409 | 19.453 | 7.671  |
| ATOM | 4015 | HD22 | ASN | A | 246 | 45.004 | 20.927 | 6.811  |
| ATOM | 4016 | C    | ASN | A | 246 | 40.805 | 19.808 | 7.854  |
| ATOM | 4017 | O    | ASN | A | 246 | 41.180 | 18.646 | 7.680  |
| ATOM | 4018 | N    | CYS | A | 247 | 39.722 | 20.087 | 8.593  |
| ATOM | 4019 | H    | CYS | A | 247 | 39.458 | 21.060 | 8.701  |
| ATOM | 4020 | CA   | CYS | A | 247 | 38.930 | 19.059 | 9.290  |
| ATOM | 4021 | HA   | CYS | A | 247 | 39.595 | 18.497 | 9.949  |
| ATOM | 4022 | CB   | CYS | A | 247 | 37.853 | 19.745 | 10.146 |
| ATOM | 4023 | HB2  | CYS | A | 247 | 37.220 | 20.394 | 9.536  |
| ATOM | 4024 | HB3  | CYS | A | 247 | 37.220 | 18.982 | 10.601 |
| ATOM | 4025 | SG   | CYS | A | 247 | 38.608 | 20.702 | 11.481 |
| ATOM | 4026 | HG   | CYS | A | 247 | 39.126 | 21.707 | 10.751 |
| ATOM | 4027 | C    | CYS | A | 247 | 38.263 | 18.036 | 8.347  |
| ATOM | 4028 | O    | CYS | A | 247 | 38.023 | 16.895 | 8.748  |
| ATOM | 4029 | N    | ILE | A | 248 | 37.934 | 18.438 | 7.116  |
| ATOM | 4030 | H    | ILE | A | 248 | 38.238 | 19.363 | 6.827  |
| ATOM | 4031 | CA   | ILE | A | 248 | 37.161 | 17.636 | 6.147  |
| ATOM | 4032 | HA   | ILE | A | 248 | 36.494 | 16.961 | 6.687  |
| ATOM | 4033 | CB   | ILE | A | 248 | 36.295 | 18.587 | 5.279  |
| ATOM | 4034 | HB   | ILE | A | 248 | 36.959 | 19.313 | 4.806  |
| ATOM | 4035 | CG2  | ILE | A | 248 | 35.554 | 17.824 | 4.161  |
| ATOM | 4036 | HG21 | ILE | A | 248 | 34.862 | 17.101 | 4.593  |
| ATOM | 4037 | HG22 | ILE | A | 248 | 34.997 | 18.518 | 3.534  |
| ATOM | 4038 | HG23 | ILE | A | 248 | 36.263 | 17.307 | 3.516  |
| ATOM | 4039 | CG1  | ILE | A | 248 | 35.286 | 19.358 | 6.172  |
| ATOM | 4040 | HG12 | ILE | A | 248 | 34.561 | 18.656 | 6.586  |
| ATOM | 4041 | HG13 | ILE | A | 248 | 35.810 | 19.820 | 7.008  |

|      |      |      |     |   |     |        |        |        |
|------|------|------|-----|---|-----|--------|--------|--------|
| ATOM | 4042 | CD1  | ILE | A | 248 | 34.533 | 20.486 | 5.456  |
| ATOM | 4043 | HD11 | ILE | A | 248 | 35.244 | 21.176 | 5.001  |
| ATOM | 4044 | HD12 | ILE | A | 248 | 33.870 | 20.080 | 4.694  |
| ATOM | 4045 | HD13 | ILE | A | 248 | 33.930 | 21.031 | 6.184  |
| ATOM | 4046 | C    | ILE | A | 248 | 38.119 | 16.774 | 5.311  |
| ATOM | 4047 | O    | ILE | A | 248 | 39.096 | 17.292 | 4.773  |
| ATOM | 4048 | N    | ILE | A | 249 | 37.877 | 15.465 | 5.186  |
| ATOM | 4049 | H    | ILE | A | 249 | 37.055 | 15.082 | 5.651  |
| ATOM | 4050 | CA   | ILE | A | 249 | 38.832 | 14.531 | 4.542  |
| ATOM | 4051 | HA   | ILE | A | 249 | 39.816 | 14.738 | 4.964  |
| ATOM | 4052 | CB   | ILE | A | 249 | 38.460 | 13.064 | 4.886  |
| ATOM | 4053 | HB   | ILE | A | 249 | 38.269 | 13.012 | 5.958  |
| ATOM | 4054 | CG2  | ILE | A | 249 | 37.181 | 12.593 | 4.165  |
| ATOM | 4055 | HG21 | ILE | A | 249 | 36.381 | 13.317 | 4.292  |
| ATOM | 4056 | HG22 | ILE | A | 249 | 37.371 | 12.466 | 3.099  |
| ATOM | 4057 | HG23 | ILE | A | 249 | 36.856 | 11.637 | 4.578  |
| ATOM | 4058 | CG1  | ILE | A | 249 | 39.579 | 12.044 | 4.583  |
| ATOM | 4059 | HG12 | ILE | A | 249 | 39.241 | 11.057 | 4.902  |
| ATOM | 4060 | HG13 | ILE | A | 249 | 39.758 | 11.994 | 3.510  |
| ATOM | 4061 | CD1  | ILE | A | 249 | 40.909 | 12.332 | 5.288  |
| ATOM | 4062 | HD11 | ILE | A | 249 | 41.576 | 11.480 | 5.157  |
| ATOM | 4063 | HD12 | ILE | A | 249 | 41.382 | 13.222 | 4.873  |
| ATOM | 4064 | HD13 | ILE | A | 249 | 40.741 | 12.488 | 6.349  |
| ATOM | 4065 | C    | ILE | A | 249 | 38.980 | 14.737 | 3.025  |
| ATOM | 4066 | O    | ILE | A | 249 | 40.031 | 14.440 | 2.455  |
| ATOM | 4067 | N    | ASN | A | 250 | 37.937 | 15.239 | 2.362  |
| ATOM | 4068 | H    | ASN | A | 250 | 37.127 | 15.509 | 2.896  |
| ATOM | 4069 | CA   | ASN | A | 250 | 37.897 | 15.375 | 0.910  |
| ATOM | 4070 | HA   | ASN | A | 250 | 38.407 | 14.514 | 0.473  |
| ATOM | 4071 | CB   | ASN | A | 250 | 36.441 | 15.324 | 0.430  |
| ATOM | 4072 | HB2  | ASN | A | 250 | 35.946 | 14.462 | 0.876  |
| ATOM | 4073 | HB3  | ASN | A | 250 | 35.901 | 16.216 | 0.742  |
| ATOM | 4074 | CG   | ASN | A | 250 | 36.392 | 15.201 | -1.086 |
| ATOM | 4075 | OD1  | ASN | A | 250 | 36.678 | 16.150 | -1.804 |
| ATOM | 4076 | ND2  | ASN | A | 250 | 36.125 | 14.017 | -1.600 |
| ATOM | 4077 | HD21 | ASN | A | 250 | 36.180 | 13.884 | -2.596 |
| ATOM | 4078 | HD22 | ASN | A | 250 | 35.894 | 13.243 | -0.989 |
| ATOM | 4079 | C    | ASN | A | 250 | 38.622 | 16.651 | 0.439  |
| ATOM | 4080 | O    | ASN | A | 250 | 38.146 | 17.770 | 0.637  |
| ATOM | 4081 | N    | LEU | A | 251 | 39.763 | 16.485 | -0.237 |
| ATOM | 4082 | H    | LEU | A | 251 | 40.129 | 15.548 | -0.323 |
| ATOM | 4083 | CA   | LEU | A | 251 | 40.595 | 17.600 | -0.708 |
| ATOM | 4084 | HA   | LEU | A | 251 | 40.777 | 18.271 | 0.134  |
| ATOM | 4085 | CB   | LEU | A | 251 | 41.953 | 17.061 | -1.205 |
| ATOM | 4086 | HB2  | LEU | A | 251 | 41.782 | 16.415 | -2.069 |
| ATOM | 4087 | HB3  | LEU | A | 251 | 42.554 | 17.910 | -1.539 |
| ATOM | 4088 | CG   | LEU | A | 251 | 42.763 | 16.276 | -0.149 |
| ATOM | 4089 | HG   | LEU | A | 251 | 42.204 | 15.385 | 0.141  |
| ATOM | 4090 | CD1  | LEU | A | 251 | 44.093 | 15.816 | -0.757 |
| ATOM | 4091 | HD11 | LEU | A | 251 | 43.904 | 15.200 | -1.637 |
| ATOM | 4092 | HD12 | LEU | A | 251 | 44.696 | 16.676 | -1.043 |
| ATOM | 4093 | HD13 | LEU | A | 251 | 44.643 | 15.219 | -0.029 |
| ATOM | 4094 | CD2  | LEU | A | 251 | 43.027 | 17.109 | 1.113  |
| ATOM | 4095 | HD21 | LEU | A | 251 | 43.696 | 16.566 | 1.779  |
| ATOM | 4096 | HD22 | LEU | A | 251 | 43.484 | 18.064 | 0.852  |
| ATOM | 4097 | HD23 | LEU | A | 251 | 42.095 | 17.288 | 1.646  |
| ATOM | 4098 | C    | LEU | A | 251 | 39.902 | 18.457 | -1.779 |

|      |      |         |     |   |     |        |        |        |
|------|------|---------|-----|---|-----|--------|--------|--------|
| ATOM | 4099 | O       | LEU | A | 251 | 40.052 | 19.679 | -1.772 |
| ATOM | 4100 | N       | LYS | A | 252 | 39.100 | 17.869 | -2.672 |
| ATOM | 4101 | H       | LYS | A | 252 | 38.973 | 16.868 | -2.627 |
| ATOM | 4102 | CA      | LYS | A | 252 | 38.313 | 18.630 | -3.656 |
| ATOM | 4103 | HA      | LYS | A | 252 | 38.983 | 19.304 | -4.192 |
| ATOM | 4104 | CB      | LYS | A | 252 | 37.716 | 17.665 | -4.697 |
| ATOM | 4105 | HB2     | LYS | A | 252 | 38.547 | 17.169 | -5.193 |
| ATOM | 4106 | HB3     | LYS | A | 252 | 37.121 | 16.896 | -4.207 |
| ATOM | 4107 | CG      | LYS | A | 252 | 36.851 | 18.390 | -5.747 |
| ATOM | 4108 | HG2     | LYS | A | 252 | 35.831 | 18.471 | -5.366 |
| ATOM | 4109 | HG3     | LYS | A | 252 | 37.237 | 19.401 | -5.886 |
| ATOM | 4110 | CD      | LYS | A | 252 | 36.836 | 17.725 | -7.135 |
| ATOM | 4111 | HD2     | LYS | A | 252 | 36.009 | 18.137 | -7.717 |
| ATOM | 4112 | HD3     | LYS | A | 252 | 37.765 | 18.005 | -7.636 |
| ATOM | 4113 | CE      | LYS | A | 252 | 36.764 | 16.193 | -7.154 |
| ATOM | 4114 | HE2     | LYS | A | 252 | 36.749 | 15.854 | -8.193 |
| ATOM | 4115 | HE3     | LYS | A | 252 | 37.677 | 15.793 | -6.702 |
| ATOM | 4116 | NZ      | LYS | A | 252 | 35.589 | 15.645 | -6.440 |
| ATOM | 4117 | HZ1     | LYS | A | 252 | 35.539 | 15.992 | -5.497 |
| ATOM | 4118 | HZ2     | LYS | A | 252 | 34.705 | 15.855 | -6.900 |
| ATOM | 4119 | HZ3     | LYS | A | 252 | 35.681 | 14.631 | -6.381 |
| ATOM | 4120 | C       | LYS | A | 252 | 37.269 | 19.531 | -2.976 |
| ATOM | 4121 | O       | LYS | A | 252 | 37.128 | 20.690 | -3.361 |
| ATOM | 4122 | N       | ALA | A | 253 | 36.607 | 19.057 | -1.915 |
| ATOM | 4123 | H       | ALA | A | 253 | 36.741 | 18.083 | -1.663 |
| ATOM | 4124 | CA      | ALA | A | 253 | 35.702 | 19.876 | -1.105 |
| ATOM | 4125 | HA      | ALA | A | 253 | 34.925 | 20.278 | -1.759 |
| ATOM | 4126 | CB      | ALA | A | 253 | 35.026 | 18.990 | -0.052 |
| ATOM | 4127 | HB1     | ALA | A | 253 | 34.294 | 19.581 | 0.498  |
| ATOM | 4128 | HB2     | ALA | A | 253 | 34.517 | 18.154 | -0.534 |
| ATOM | 4129 | HB3     | ALA | A | 253 | 35.760 | 18.611 | 0.658  |
| ATOM | 4130 | C       | ALA | A | 253 | 36.413 | 21.085 | -0.464 |
| ATOM | 4131 | O       | ALA | A | 253 | 35.850 | 22.180 | -0.463 |
| ATOM | 4132 | N       | ARG | A | 254 | 37.665 | 20.923 | 0.002  |
| ATOM | 4133 | H       | ARG | A | 254 | 38.066 | 19.994 | -0.004 |
| ATOM | 4134 | CA      | ARG | A | 254 | 38.472 | 22.043 | 0.515  |
| ATOM | 4135 | HA      | ARG | A | 254 | 37.898 | 22.522 | 1.308  |
| ATOM | 4136 | CB      | ARG | A | 254 | 39.811 | 21.585 | 1.121  |
| ATOM | 4137 | HB2     | ARG | A | 254 | 40.433 | 21.132 | 0.348  |
| ATOM | 4138 | HB3     | ARG | A | 254 | 40.331 | 22.472 | 1.489  |
| ATOM | 4139 | CG      | ARG | A | 254 | 39.663 | 20.597 | 2.286  |
| ATOM | 4140 | HG2     | ARG | A | 254 | 38.960 | 20.998 | 3.017  |
| ATOM | 4141 | HG3     | ARG | A | 254 | 39.281 | 19.652 | 1.909  |
| ATOM | 4142 | CD      | ARG | A | 254 | 41.025 | 20.365 | 2.952  |
| ATOM | 4143 | HD2     | ARG | A | 254 | 41.773 | 20.216 | 2.172  |
| ATOM | 4144 | HD3     | ARG | A | 254 | 41.293 | 21.246 | 3.537  |
| ATOM | 4145 | NE      | ARG | A | 254 | 41.016 | 19.181 | 3.822  |
| ATOM | 4146 | HE      | ARG | A | 254 | 40.111 | 18.795 | 4.079  |
| ATOM | 4147 | CZ      | ARG | A | 254 | 42.078 | 18.515 | 4.252  |
| ATOM | 4148 | NH1     | ARG | A | 254 | 43.304 | 18.956 | 4.089  |
| ATOM | 4149 | HH11ARG | ARG | A | 254 | 43.467 | 19.878 | 3.702  |
| ATOM | 4150 | HH12ARG | ARG | A | 254 | 44.101 | 18.343 | 4.241  |
| ATOM | 4151 | NH2     | ARG | A | 254 | 41.890 | 17.377 | 4.869  |
| ATOM | 4152 | HH21ARG | ARG | A | 254 | 40.930 | 17.079 | 5.013  |
| ATOM | 4153 | HH22ARG | ARG | A | 254 | 42.653 | 16.887 | 5.316  |
| ATOM | 4154 | C       | ARG | A | 254 | 38.722 | 23.101 | -0.568 |
| ATOM | 4155 | O       | ARG | A | 254 | 38.413 | 24.270 | -0.347 |

|      |      |      |     |   |     |        |        |        |
|------|------|------|-----|---|-----|--------|--------|--------|
| ATOM | 4156 | N    | ASN | A | 255 | 39.228 | 22.710 | -1.745 |
| ATOM | 4157 | H    | ASN | A | 255 | 39.472 | 21.735 | -1.870 |
| ATOM | 4158 | CA   | ASN | A | 255 | 39.455 | 23.646 | -2.859 |
| ATOM | 4159 | HA   | ASN | A | 255 | 40.159 | 24.409 | -2.525 |
| ATOM | 4160 | CB   | ASN | A | 255 | 40.082 | 22.907 | -4.052 |
| ATOM | 4161 | HB2  | ASN | A | 255 | 41.073 | 22.553 | -3.773 |
| ATOM | 4162 | HB3  | ASN | A | 255 | 39.467 | 22.048 | -4.321 |
| ATOM | 4163 | CG   | ASN | A | 255 | 40.199 | 23.825 | -5.266 |
| ATOM | 4164 | OD1  | ASN | A | 255 | 39.287 | 23.937 | -6.073 |
| ATOM | 4165 | ND2  | ASN | A | 255 | 41.282 | 24.565 | -5.389 |
| ATOM | 4166 | HD21 | ASN | A | 255 | 41.319 | 25.229 | -6.149 |
| ATOM | 4167 | HD22 | ASN | A | 255 | 42.061 | 24.465 | -4.760 |
| ATOM | 4168 | C    | ASN | A | 255 | 38.164 | 24.365 | -3.294 |
| ATOM | 4169 | O    | ASN | A | 255 | 38.173 | 25.582 | -3.495 |
| ATOM | 4170 | N    | TYR | A | 256 | 37.051 | 23.630 | -3.396 |
| ATOM | 4171 | H    | TYR | A | 256 | 37.126 | 22.627 | -3.263 |
| ATOM | 4172 | CA   | TYR | A | 256 | 35.731 | 24.172 | -3.719 |
| ATOM | 4173 | HA   | TYR | A | 256 | 35.772 | 24.639 | -4.705 |
| ATOM | 4174 | CB   | TYR | A | 256 | 34.728 | 23.010 | -3.780 |
| ATOM | 4175 | HB2  | TYR | A | 256 | 35.036 | 22.327 | -4.574 |
| ATOM | 4176 | HB3  | TYR | A | 256 | 34.766 | 22.452 | -2.845 |
| ATOM | 4177 | CG   | TYR | A | 256 | 33.293 | 23.423 | -4.039 |
| ATOM | 4178 | CD1  | TYR | A | 256 | 32.875 | 23.738 | -5.347 |
| ATOM | 4179 | HD1  | TYR | A | 256 | 33.581 | 23.692 | -6.164 |
| ATOM | 4180 | CE1  | TYR | A | 256 | 31.537 | 24.101 | -5.596 |
| ATOM | 4181 | HE1  | TYR | A | 256 | 31.218 | 24.337 | -6.601 |
| ATOM | 4182 | CZ   | TYR | A | 256 | 30.611 | 24.150 | -4.529 |
| ATOM | 4183 | OH   | TYR | A | 256 | 29.317 | 24.501 | -4.756 |
| ATOM | 4184 | HH   | TYR | A | 256 | 29.138 | 24.699 | -5.677 |
| ATOM | 4185 | CE2  | TYR | A | 256 | 31.032 | 23.835 | -3.218 |
| ATOM | 4186 | HE2  | TYR | A | 256 | 30.320 | 23.872 | -2.406 |
| ATOM | 4187 | CD2  | TYR | A | 256 | 32.371 | 23.474 | -2.975 |
| ATOM | 4188 | HD2  | TYR | A | 256 | 32.685 | 23.227 | -1.971 |
| ATOM | 4189 | C    | TYR | A | 256 | 35.316 | 25.260 | -2.716 |
| ATOM | 4190 | O    | TYR | A | 256 | 35.145 | 26.413 | -3.108 |
| ATOM | 4191 | N    | LEU | A | 257 | 35.256 | 24.934 | -1.418 |
| ATOM | 4192 | H    | LEU | A | 257 | 35.474 | 23.978 | -1.153 |
| ATOM | 4193 | CA   | LEU | A | 257 | 34.909 | 25.881 | -0.350 |
| ATOM | 4194 | HA   | LEU | A | 257 | 33.899 | 26.254 | -0.521 |
| ATOM | 4195 | CB   | LEU | A | 257 | 34.971 | 25.158 | 1.006  |
| ATOM | 4196 | HB2  | LEU | A | 257 | 35.917 | 24.615 | 1.056  |
| ATOM | 4197 | HB3  | LEU | A | 257 | 34.972 | 25.908 | 1.799  |
| ATOM | 4198 | CG   | LEU | A | 257 | 33.814 | 24.176 | 1.276  |
| ATOM | 4199 | HG   | LEU | A | 257 | 33.684 | 23.518 | 0.416  |
| ATOM | 4200 | CD1  | LEU | A | 257 | 34.166 | 23.312 | 2.494  |
| ATOM | 4201 | HD11 | LEU | A | 257 | 34.324 | 23.940 | 3.371  |
| ATOM | 4202 | HD12 | LEU | A | 257 | 33.354 | 22.615 | 2.696  |
| ATOM | 4203 | HD13 | LEU | A | 257 | 35.073 | 22.740 | 2.295  |
| ATOM | 4204 | CD2  | LEU | A | 257 | 32.491 | 24.916 | 1.533  |
| ATOM | 4205 | HD21 | LEU | A | 257 | 32.191 | 25.477 | 0.649  |
| ATOM | 4206 | HD22 | LEU | A | 257 | 31.705 | 24.196 | 1.763  |
| ATOM | 4207 | HD23 | LEU | A | 257 | 32.600 | 25.603 | 2.373  |
| ATOM | 4208 | C    | LEU | A | 257 | 35.825 | 27.114 | -0.344 |
| ATOM | 4209 | O    | LEU | A | 257 | 35.315 | 28.232 | -0.306 |
| ATOM | 4210 | N    | LEU | A | 258 | 37.145 | 26.912 | -0.449 |
| ATOM | 4211 | H    | LEU | A | 258 | 37.472 | 25.951 | -0.457 |
| ATOM | 4212 | CA   | LEU | A | 258 | 38.172 | 27.964 | -0.499 |

|      |      |      |     |   |     |        |        |        |
|------|------|------|-----|---|-----|--------|--------|--------|
| ATOM | 4213 | HA   | LEU | A | 258 | 38.052 | 28.599 | 0.378  |
| ATOM | 4214 | CB   | LEU | A | 258 | 39.547 | 27.256 | -0.441 |
| ATOM | 4215 | HB2  | LEU | A | 258 | 39.541 | 26.552 | 0.393  |
| ATOM | 4216 | HB3  | LEU | A | 258 | 39.665 | 26.676 | -1.358 |
| ATOM | 4217 | CG   | LEU | A | 258 | 40.787 | 28.161 | -0.279 |
| ATOM | 4218 | HG   | LEU | A | 258 | 40.773 | 28.932 | -1.045 |
| ATOM | 4219 | CD1  | LEU | A | 258 | 40.840 | 28.843 | 1.094  |
| ATOM | 4220 | HD11 | LEU | A | 258 | 39.932 | 29.416 | 1.272  |
| ATOM | 4221 | HD12 | LEU | A | 258 | 40.960 | 28.102 | 1.883  |
| ATOM | 4222 | HD13 | LEU | A | 258 | 41.690 | 29.521 | 1.123  |
| ATOM | 4223 | CD2  | LEU | A | 258 | 42.064 | 27.328 | -0.465 |
| ATOM | 4224 | HD21 | LEU | A | 258 | 42.125 | 26.550 | 0.297  |
| ATOM | 4225 | HD22 | LEU | A | 258 | 42.063 | 26.862 | -1.450 |
| ATOM | 4226 | HD23 | LEU | A | 258 | 42.941 | 27.972 | -0.389 |
| ATOM | 4227 | C    | LEU | A | 258 | 38.042 | 28.879 | -1.732 |
| ATOM | 4228 | O    | LEU | A | 258 | 38.489 | 30.025 | -1.690 |
| ATOM | 4229 | N    | SER | A | 259 | 37.434 | 28.399 | -2.818 |
| ATOM | 4230 | H    | SER | A | 259 | 37.113 | 27.439 | -2.791 |
| ATOM | 4231 | CA   | SER | A | 259 | 37.215 | 29.157 | -4.062 |
| ATOM | 4232 | HA   | SER | A | 259 | 37.939 | 29.970 | -4.127 |
| ATOM | 4233 | CB   | SER | A | 259 | 37.413 | 28.222 | -5.264 |
| ATOM | 4234 | HB2  | SER | A | 259 | 36.654 | 27.438 | -5.240 |
| ATOM | 4235 | HB3  | SER | A | 259 | 37.291 | 28.795 | -6.184 |
| ATOM | 4236 | OG   | SER | A | 259 | 38.703 | 27.629 | -5.253 |
| ATOM | 4237 | HG   | SER | A | 259 | 38.658 | 26.856 | -4.654 |
| ATOM | 4238 | C    | SER | A | 259 | 35.823 | 29.800 | -4.177 |
| ATOM | 4239 | O    | SER | A | 259 | 35.607 | 30.669 | -5.029 |
| ATOM | 4240 | N    | LEU | A | 260 | 34.872 | 29.398 | -3.332 |
| ATOM | 4241 | H    | LEU | A | 260 | 35.112 | 28.692 | -2.645 |
| ATOM | 4242 | CA   | LEU | A | 260 | 33.537 | 29.990 | -3.259 |
| ATOM | 4243 | HA   | LEU | A | 260 | 33.190 | 30.162 | -4.277 |
| ATOM | 4244 | CB   | LEU | A | 260 | 32.588 | 28.989 | -2.565 |
| ATOM | 4245 | HB2  | LEU | A | 260 | 33.163 | 28.248 | -2.006 |
| ATOM | 4246 | HB3  | LEU | A | 260 | 31.990 | 29.541 | -1.847 |
| ATOM | 4247 | CG   | LEU | A | 260 | 31.609 | 28.263 | -3.512 |
| ATOM | 4248 | HG   | LEU | A | 260 | 30.968 | 29.007 | -3.986 |
| ATOM | 4249 | CD1  | LEU | A | 260 | 32.299 | 27.457 | -4.622 |
| ATOM | 4250 | HD11 | LEU | A | 260 | 32.862 | 26.632 | -4.192 |
| ATOM | 4251 | HD12 | LEU | A | 260 | 31.545 | 27.052 | -5.297 |
| ATOM | 4252 | HD13 | LEU | A | 260 | 32.970 | 28.090 | -5.201 |
| ATOM | 4253 | CD2  | LEU | A | 260 | 30.723 | 27.325 | -2.680 |
| ATOM | 4254 | HD21 | LEU | A | 260 | 29.968 | 26.867 | -3.319 |
| ATOM | 4255 | HD22 | LEU | A | 260 | 31.330 | 26.545 | -2.220 |
| ATOM | 4256 | HD23 | LEU | A | 260 | 30.218 | 27.885 | -1.895 |
| ATOM | 4257 | C    | LEU | A | 260 | 33.581 | 31.371 | -2.564 |
| ATOM | 4258 | O    | LEU | A | 260 | 34.496 | 31.630 | -1.771 |
| ATOM | 4259 | N    | PRO | A | 261 | 32.620 | 32.273 | -2.849 |
| ATOM | 4260 | CD   | PRO | A | 261 | 31.452 | 32.077 | -3.699 |
| ATOM | 4261 | HD2  | PRO | A | 261 | 30.900 | 31.179 | -3.421 |
| ATOM | 4262 | HD3  | PRO | A | 261 | 31.764 | 32.026 | -4.742 |
| ATOM | 4263 | CG   | PRO | A | 261 | 30.566 | 33.305 | -3.486 |
| ATOM | 4264 | HG2  | PRO | A | 261 | 29.895 | 33.134 | -2.643 |
| ATOM | 4265 | HG3  | PRO | A | 261 | 30.000 | 33.555 | -4.384 |
| ATOM | 4266 | CB   | PRO | A | 261 | 31.576 | 34.393 | -3.129 |
| ATOM | 4267 | HB2  | PRO | A | 261 | 31.124 | 35.197 | -2.549 |
| ATOM | 4268 | HB3  | PRO | A | 261 | 32.026 | 34.785 | -4.041 |
| ATOM | 4269 | CA   | PRO | A | 261 | 32.639 | 33.636 | -2.333 |

|      |      |      |     |   |     |        |        |        |
|------|------|------|-----|---|-----|--------|--------|--------|
| ATOM | 4270 | HA   | PRO | A | 261 | 33.614 | 34.089 | -2.523 |
| ATOM | 4271 | C    | PRO | A | 261 | 32.361 | 33.672 | -0.829 |
| ATOM | 4272 | O    | PRO | A | 261 | 31.734 | 32.767 | -0.273 |
| ATOM | 4273 | N    | HIE | A | 262 | 32.832 | 34.727 | -0.165 |
| ATOM | 4274 | H    | HIE | A | 262 | 33.287 | 35.472 | -0.693 |
| ATOM | 4275 | CA   | HIE | A | 262 | 32.732 | 34.876 | 1.285  |
| ATOM | 4276 | HA   | HIE | A | 262 | 33.016 | 33.928 | 1.735  |
| ATOM | 4277 | CB   | HIE | A | 262 | 33.748 | 35.916 | 1.759  |
| ATOM | 4278 | HB2  | HIE | A | 262 | 34.739 | 35.623 | 1.415  |
| ATOM | 4279 | HB3  | HIE | A | 262 | 33.494 | 36.886 | 1.329  |
| ATOM | 4280 | CG   | HIE | A | 262 | 33.797 | 36.038 | 3.255  |
| ATOM | 4281 | ND1  | HIE | A | 262 | 33.199 | 37.057 | 3.993  |
| ATOM | 4282 | CE1  | HIE | A | 262 | 33.466 | 36.773 | 5.277  |
| ATOM | 4283 | HE1  | HIE | A | 262 | 33.164 | 37.380 | 6.119  |
| ATOM | 4284 | NE2  | HIE | A | 262 | 34.168 | 35.633 | 5.377  |
| ATOM | 4285 | HE2  | HIE | A | 262 | 34.472 | 35.207 | 6.247  |
| ATOM | 4286 | CD2  | HIE | A | 262 | 34.386 | 35.154 | 4.107  |
| ATOM | 4287 | HD2  | HIE | A | 262 | 34.924 | 34.259 | 3.830  |
| ATOM | 4288 | C    | HIE | A | 262 | 31.302 | 35.204 | 1.753  |
| ATOM | 4289 | O    | HIE | A | 262 | 30.621 | 36.063 | 1.182  |
| ATOM | 4290 | N    | LYS | A | 263 | 30.856 | 34.526 | 2.812  |
| ATOM | 4291 | H    | LYS | A | 263 | 31.483 | 33.846 | 3.229  |
| ATOM | 4292 | CA   | LYS | A | 263 | 29.532 | 34.665 | 3.418  |
| ATOM | 4293 | HA   | LYS | A | 263 | 28.938 | 35.385 | 2.852  |
| ATOM | 4294 | CB   | LYS | A | 263 | 28.835 | 33.292 | 3.378  |
| ATOM | 4295 | HB2  | LYS | A | 263 | 29.479 | 32.561 | 3.873  |
| ATOM | 4296 | HB3  | LYS | A | 263 | 27.920 | 33.366 | 3.965  |
| ATOM | 4297 | CG   | LYS | A | 263 | 28.470 | 32.747 | 1.980  |
| ATOM | 4298 | HG2  | LYS | A | 263 | 29.364 | 32.665 | 1.362  |
| ATOM | 4299 | HG3  | LYS | A | 263 | 28.064 | 31.745 | 2.120  |
| ATOM | 4300 | CD   | LYS | A | 263 | 27.417 | 33.604 | 1.261  |
| ATOM | 4301 | HD2  | LYS | A | 263 | 26.678 | 33.904 | 1.999  |
| ATOM | 4302 | HD3  | LYS | A | 263 | 27.891 | 34.499 | 0.858  |
| ATOM | 4303 | CE   | LYS | A | 263 | 26.714 | 32.830 | 0.132  |
| ATOM | 4304 | HE2  | LYS | A | 263 | 27.427 | 32.636 | -0.673 |
| ATOM | 4305 | HE3  | LYS | A | 263 | 26.381 | 31.864 | 0.524  |
| ATOM | 4306 | NZ   | LYS | A | 263 | 25.535 | 33.565 | -0.393 |
| ATOM | 4307 | HZ1  | LYS | A | 263 | 24.828 | 33.675 | 0.334  |
| ATOM | 4308 | HZ2  | LYS | A | 263 | 25.775 | 34.488 | -0.722 |
| ATOM | 4309 | HZ3  | LYS | A | 263 | 25.098 | 33.075 | -1.165 |
| ATOM | 4310 | C    | LYS | A | 263 | 29.630 | 35.187 | 4.867  |
| ATOM | 4311 | O    | LYS | A | 263 | 30.512 | 34.785 | 5.632  |
| ATOM | 4312 | N    | ASN | A | 264 | 28.697 | 36.064 | 5.246  |
| ATOM | 4313 | H    | ASN | A | 264 | 27.987 | 36.309 | 4.574  |
| ATOM | 4314 | CA   | ASN | A | 264 | 28.601 | 36.703 | 6.567  |
| ATOM | 4315 | HA   | ASN | A | 264 | 29.599 | 36.986 | 6.894  |
| ATOM | 4316 | CB   | ASN | A | 264 | 27.773 | 37.993 | 6.393  |
| ATOM | 4317 | HB2  | ASN | A | 264 | 28.249 | 38.618 | 5.636  |
| ATOM | 4318 | HB3  | ASN | A | 264 | 26.777 | 37.732 | 6.032  |
| ATOM | 4319 | CG   | ASN | A | 264 | 27.615 | 38.809 | 7.675  |
| ATOM | 4320 | OD1  | ASN | A | 264 | 26.725 | 38.561 | 8.479  |
| ATOM | 4321 | ND2  | ASN | A | 264 | 28.434 | 39.816 | 7.898  |
| ATOM | 4322 | HD21 | ASN | A | 264 | 28.369 | 40.356 | 8.750  |
| ATOM | 4323 | HD22 | ASN | A | 264 | 29.133 | 40.073 | 7.205  |
| ATOM | 4324 | C    | ASN | A | 264 | 27.978 | 35.763 | 7.625  |
| ATOM | 4325 | O    | ASN | A | 264 | 26.933 | 35.164 | 7.374  |
| ATOM | 4326 | N    | LYS | A | 265 | 28.573 | 35.652 | 8.821  |

|      |      |         |     |     |        |        |        |        |
|------|------|---------|-----|-----|--------|--------|--------|--------|
| ATOM | 4327 | H       | LYS | A   | 265    | 29.461 | 36.116 | 8.974  |
| ATOM | 4328 | CA      | LYS | A   | 265    | 27.974 | 34.899 | 9.937  |
| ATOM | 4329 | HA      | LYS | A   | 265    | 27.596 | 33.953 | 9.548  |
| ATOM | 4330 | CB      | LYS | A   | 265    | 29.049 | 34.559 | 10.991 |
| ATOM | 4331 | HB2     | LYS | A   | 265    | 29.804 | 33.917 | 10.533 |
| ATOM | 4332 | HB3     | LYS | A   | 265    | 29.529 | 35.477 | 11.339 |
| ATOM | 4333 | CG      | LYS | A   | 265    | 28.414 | 33.829 | 12.192 |
| ATOM | 4334 | HG2     | LYS | A   | 265    | 27.693 | 34.482 | 12.683 |
| ATOM | 4335 | HG3     | LYS | A   | 265    | 27.879 | 32.950 | 11.832 |
| ATOM | 4336 | CD      | LYS | A   | 265    | 29.420 | 33.407 | 13.262 |
| ATOM | 4337 | HD2     | LYS | A   | 265    | 30.169 | 34.184 | 13.398 |
| ATOM | 4338 | HD3     | LYS | A   | 265    | 28.888 | 33.275 | 14.203 |
| ATOM | 4339 | CE      | LYS | A   | 265    | 30.083 | 32.089 | 12.880 |
| ATOM | 4340 | HE2     | LYS | A   | 265    | 29.312 | 31.320 | 12.783 |
| ATOM | 4341 | HE3     | LYS | A   | 265    | 30.562 | 32.202 | 11.903 |
| ATOM | 4342 | NZ      | LYS | A   | 265    | 31.083 | 31.670 | 13.886 |
| ATOM | 4343 | HZ1     | LYS | A   | 265    | 31.428 | 30.745 | 13.650 |
| ATOM | 4344 | HZ2     | LYS | A   | 265    | 31.874 | 32.305 | 13.891 |
| ATOM | 4345 | HZ3     | LYS | A   | 265    | 30.712 | 31.638 | 14.828 |
| ATOM | 4346 | C       | LYS | A   | 265    | 26.776 | 35.660 | 10.547 |
| ATOM | 4347 | O       | LYS | A   | 265    | 26.966 | 36.546 | 11.386 |
| ATOM | 4348 | N       | VAL | A   | 266    | 25.552 | 35.305 | 10.166 |
| ATOM | 4349 | H       | VAL | A   | 266    | 25.492 | 34.456 | 9.600  |
| ATOM | 4350 | CA      | VAL | A   | 266    | 24.296 | 35.883 | 10.674 |
| ATOM | 4351 | HA      | VAL | A   | 266    | 24.368 | 36.962 | 10.560 |
| ATOM | 4352 | CB      | VAL | A   | 266    | 23.071 | 35.418 | 9.852  |
| ATOM | 4353 | HB      | VAL | A   | 266    | 22.986 | 34.332 | 9.911  |
| ATOM | 4354 | CG1     | VAL | A   | 266    | 21.782 | 36.048 | 10.405 |
| ATOM | 4355 | HG11VAL | A   | 266 | 21.867 | 37.135 | 10.406 |        |
| ATOM | 4356 | HG12VAL | A   | 266 | 20.929 | 35.752 | 9.794  |        |
| ATOM | 4357 | HG13VAL | A   | 266 | 21.604 | 35.712 | 11.425 |        |
| ATOM | 4358 | CG2     | VAL | A   | 266    | 23.219 | 35.809 | 8.371  |
| ATOM | 4359 | HG21VAL | A   | 266 | 24.094 | 35.325 | 7.938  |        |
| ATOM | 4360 | HG22VAL | A   | 266 | 22.339 | 35.483 | 7.814  |        |
| ATOM | 4361 | HG23VAL | A   | 266 | 23.324 | 36.890 | 8.277  |        |
| ATOM | 4362 | C       | VAL | A   | 266    | 24.122 | 35.475 | 12.150 |
| ATOM | 4363 | O       | VAL | A   | 266    | 24.052 | 34.273 | 12.414 |
| ATOM | 4364 | N       | PRO | A   | 267    | 24.068 | 36.418 | 13.113 |
| ATOM | 4365 | CD      | PRO | A   | 267    | 24.116 | 37.861 | 12.928 |
| ATOM | 4366 | HD2     | PRO | A   | 267    | 23.099 | 38.237 | 12.814 |
| ATOM | 4367 | HD3     | PRO | A   | 267    | 24.734 | 38.168 | 12.086 |
| ATOM | 4368 | CG      | PRO | A   | 267    | 24.725 | 38.410 | 14.209 |
| ATOM | 4369 | HG2     | PRO | A   | 267    | 24.384 | 39.423 | 14.404 |
| ATOM | 4370 | HG3     | PRO | A   | 267    | 25.811 | 38.390 | 14.138 |
| ATOM | 4371 | CB      | PRO | A   | 267    | 24.264 | 37.429 | 15.280 |
| ATOM | 4372 | HB2     | PRO | A   | 267    | 23.294 | 37.738 | 15.661 |
| ATOM | 4373 | HB3     | PRO | A   | 267    | 24.981 | 37.368 | 16.096 |
| ATOM | 4374 | CA      | PRO | A   | 267    | 24.143 | 36.096 | 14.537 |
| ATOM | 4375 | HA      | PRO | A   | 267    | 25.054 | 35.521 | 14.704 |
| ATOM | 4376 | C       | PRO | A   | 267    | 22.938 | 35.305 | 15.048 |
| ATOM | 4377 | O       | PRO | A   | 267    | 21.788 | 35.626 | 14.739 |
| ATOM | 4378 | N       | TRP | A   | 268    | 23.197 | 34.314 | 15.905 |
| ATOM | 4379 | H       | TRP | A   | 268    | 24.165 | 34.093 | 16.121 |
| ATOM | 4380 | CA      | TRP | A   | 268    | 22.154 | 33.532 | 16.570 |
| ATOM | 4381 | HA      | TRP | A   | 268    | 21.537 | 33.055 | 15.812 |
| ATOM | 4382 | CB      | TRP | A   | 268    | 22.800 | 32.436 | 17.424 |
| ATOM | 4383 | HB2     | TRP | A   | 268    | 23.485 | 32.905 | 18.127 |

|      |      |      |     |   |     |        |        |        |
|------|------|------|-----|---|-----|--------|--------|--------|
| ATOM | 4384 | HB3  | TRP | A | 268 | 22.013 | 31.960 | 18.010 |
| ATOM | 4385 | CG   | TRP | A | 268 | 23.533 | 31.339 | 16.709 |
| ATOM | 4386 | CD1  | TRP | A | 268 | 24.812 | 30.970 | 16.949 |
| ATOM | 4387 | HD1  | TRP | A | 268 | 25.472 | 31.451 | 17.663 |
| ATOM | 4388 | NE1  | TRP | A | 268 | 25.132 | 29.855 | 16.204 |
| ATOM | 4389 | HE1  | TRP | A | 268 | 26.042 | 29.402 | 16.254 |
| ATOM | 4390 | CE2  | TRP | A | 268 | 24.068 | 29.454 | 15.424 |
| ATOM | 4391 | CZ2  | TRP | A | 268 | 23.879 | 28.395 | 14.528 |
| ATOM | 4392 | HZ2  | TRP | A | 268 | 24.665 | 27.676 | 14.370 |
| ATOM | 4393 | CH2  | TRP | A | 268 | 22.659 | 28.286 | 13.838 |
| ATOM | 4394 | HH2  | TRP | A | 268 | 22.508 | 27.486 | 13.128 |
| ATOM | 4395 | CZ3  | TRP | A | 268 | 21.636 | 29.219 | 14.070 |
| ATOM | 4396 | HZ3  | TRP | A | 268 | 20.699 | 29.128 | 13.539 |
| ATOM | 4397 | CE3  | TRP | A | 268 | 21.821 | 30.257 | 15.002 |
| ATOM | 4398 | HE3  | TRP | A | 268 | 21.020 | 30.955 | 15.188 |
| ATOM | 4399 | CD2  | TRP | A | 268 | 23.039 | 30.406 | 15.700 |
| ATOM | 4400 | C    | TRP | A | 268 | 21.227 | 34.410 | 17.426 |
| ATOM | 4401 | O    | TRP | A | 268 | 20.016 | 34.195 | 17.411 |
| ATOM | 4402 | N    | ASN | A | 269 | 21.747 | 35.448 | 18.096 |
| ATOM | 4403 | H    | ASN | A | 269 | 22.757 | 35.568 | 18.084 |
| ATOM | 4404 | CA   | ASN | A | 269 | 20.923 | 36.385 | 18.877 |
| ATOM | 4405 | HA   | ASN | A | 269 | 20.268 | 35.784 | 19.513 |
| ATOM | 4406 | CB   | ASN | A | 269 | 21.812 | 37.216 | 19.817 |
| ATOM | 4407 | HB2  | ASN | A | 269 | 21.180 | 37.625 | 20.603 |
| ATOM | 4408 | HB3  | ASN | A | 269 | 22.538 | 36.564 | 20.305 |
| ATOM | 4409 | CG   | ASN | A | 269 | 22.555 | 38.360 | 19.129 |
| ATOM | 4410 | OD1  | ASN | A | 269 | 23.535 | 38.150 | 18.429 |
| ATOM | 4411 | ND2  | ASN | A | 269 | 22.142 | 39.598 | 19.319 |
| ATOM | 4412 | HD21 | ASN | A | 269 | 22.700 | 40.356 | 18.950 |
| ATOM | 4413 | HD22 | ASN | A | 269 | 21.392 | 39.789 | 19.974 |
| ATOM | 4414 | C    | ASN | A | 269 | 20.013 | 37.280 | 18.002 |
| ATOM | 4415 | O    | ASN | A | 269 | 18.989 | 37.770 | 18.483 |
| ATOM | 4416 | N    | ARG | A | 270 | 20.348 | 37.463 | 16.713 |
| ATOM | 4417 | H    | ARG | A | 270 | 21.198 | 37.025 | 16.382 |
| ATOM | 4418 | CA   | ARG | A | 270 | 19.501 | 38.153 | 15.723 |
| ATOM | 4419 | HA   | ARG | A | 270 | 18.974 | 38.959 | 16.227 |
| ATOM | 4420 | CB   | ARG | A | 270 | 20.355 | 38.771 | 14.597 |
| ATOM | 4421 | HB2  | ARG | A | 270 | 20.915 | 37.984 | 14.095 |
| ATOM | 4422 | HB3  | ARG | A | 270 | 19.692 | 39.218 | 13.852 |
| ATOM | 4423 | CG   | ARG | A | 270 | 21.345 | 39.846 | 15.080 |
| ATOM | 4424 | HG2  | ARG | A | 270 | 21.959 | 39.439 | 15.884 |
| ATOM | 4425 | HG3  | ARG | A | 270 | 21.988 | 40.131 | 14.244 |
| ATOM | 4426 | CD   | ARG | A | 270 | 20.642 | 41.097 | 15.605 |
| ATOM | 4427 | HD2  | ARG | A | 270 | 20.055 | 41.546 | 14.800 |
| ATOM | 4428 | HD3  | ARG | A | 270 | 19.973 | 40.819 | 16.417 |
| ATOM | 4429 | NE   | ARG | A | 270 | 21.611 | 42.072 | 16.120 |
| ATOM | 4430 | HE   | ARG | A | 270 | 22.570 | 41.755 | 16.226 |
| ATOM | 4431 | CZ   | ARG | A | 270 | 21.314 | 43.308 | 16.496 |
| ATOM | 4432 | NH1  | ARG | A | 270 | 20.073 | 43.735 | 16.486 |
| ATOM | 4433 | HH11 | ARG | A | 270 | 19.321 | 43.093 | 16.293 |
| ATOM | 4434 | HH12 | ARG | A | 270 | 19.859 | 44.703 | 16.685 |
| ATOM | 4435 | NH2  | ARG | A | 270 | 22.254 | 44.145 | 16.861 |
| ATOM | 4436 | HH21 | ARG | A | 270 | 23.219 | 43.848 | 16.944 |
| ATOM | 4437 | HH22 | ARG | A | 270 | 22.008 | 45.072 | 17.173 |
| ATOM | 4438 | C    | ARG | A | 270 | 18.426 | 37.229 | 15.134 |
| ATOM | 4439 | O    | ARG | A | 270 | 17.303 | 37.679 | 14.921 |
| ATOM | 4440 | N    | LEU | A | 271 | 18.755 | 35.949 | 14.919 |



|      |      |      |     |   |     |        |        |        |
|------|------|------|-----|---|-----|--------|--------|--------|
| ATOM | 4441 | H    | LEU | A | 271 | 19.717 | 35.686 | 15.086 |
| ATOM | 4442 | CA   | LEU | A | 271 | 17.842 | 34.902 | 14.431 |
| ATOM | 4443 | HA   | LEU | A | 271 | 17.292 | 35.270 | 13.562 |
| ATOM | 4444 | CB   | LEU | A | 271 | 18.681 | 33.671 | 14.027 |
| ATOM | 4445 | HB2  | LEU | A | 271 | 19.338 | 33.413 | 14.858 |
| ATOM | 4446 | HB3  | LEU | A | 271 | 18.018 | 32.819 | 13.863 |
| ATOM | 4447 | CG   | LEU | A | 271 | 19.524 | 33.895 | 12.756 |
| ATOM | 4448 | HG   | LEU | A | 271 | 19.974 | 34.887 | 12.795 |
| ATOM | 4449 | CD1  | LEU | A | 271 | 20.660 | 32.868 | 12.686 |
| ATOM | 4450 | HD11 | LEU | A | 271 | 21.261 | 33.059 | 11.799 |
| ATOM | 4451 | HD12 | LEU | A | 271 | 21.305 | 32.969 | 13.557 |
| ATOM | 4452 | HD13 | LEU | A | 271 | 20.257 | 31.856 | 12.645 |
| ATOM | 4453 | CD2  | LEU | A | 271 | 18.663 | 33.798 | 11.488 |
| ATOM | 4454 | HD21 | LEU | A | 271 | 17.888 | 34.564 | 11.496 |
| ATOM | 4455 | HD22 | LEU | A | 271 | 19.286 | 33.948 | 10.605 |
| ATOM | 4456 | HD23 | LEU | A | 271 | 18.193 | 32.815 | 11.425 |
| ATOM | 4457 | C    | LEU | A | 271 | 16.787 | 34.516 | 15.477 |
| ATOM | 4458 | O    | LEU | A | 271 | 15.615 | 34.367 | 15.132 |
| ATOM | 4459 | N    | PHE | A | 272 | 17.200 | 34.392 | 16.745 |
| ATOM | 4460 | H    | PHE | A | 272 | 18.190 | 34.493 | 16.924 |
| ATOM | 4461 | CA   | PHE | A | 272 | 16.360 | 33.971 | 17.872 |
| ATOM | 4462 | HA   | PHE | A | 272 | 15.317 | 33.925 | 17.554 |
| ATOM | 4463 | CB   | PHE | A | 272 | 16.781 | 32.549 | 18.295 |
| ATOM | 4464 | HB2  | PHE | A | 272 | 17.774 | 32.586 | 18.745 |
| ATOM | 4465 | HB3  | PHE | A | 272 | 16.088 | 32.207 | 19.062 |
| ATOM | 4466 | CG   | PHE | A | 272 | 16.802 | 31.510 | 17.192 |
| ATOM | 4467 | CD1  | PHE | A | 272 | 15.605 | 30.906 | 16.765 |
| ATOM | 4468 | HD1  | PHE | A | 272 | 14.663 | 31.193 | 17.213 |
| ATOM | 4469 | CE1  | PHE | A | 272 | 15.634 | 29.924 | 15.759 |
| ATOM | 4470 | HE1  | PHE | A | 272 | 14.721 | 29.446 | 15.442 |
| ATOM | 4471 | CZ   | PHE | A | 272 | 16.854 | 29.557 | 15.167 |
| ATOM | 4472 | HZ   | PHE | A | 272 | 16.872 | 28.812 | 14.388 |
| ATOM | 4473 | CE2  | PHE | A | 272 | 18.050 | 30.153 | 15.596 |
| ATOM | 4474 | HE2  | PHE | A | 272 | 18.986 | 29.853 | 15.154 |
| ATOM | 4475 | CD2  | PHE | A | 272 | 18.026 | 31.128 | 16.609 |
| ATOM | 4476 | HD2  | PHE | A | 272 | 18.949 | 31.583 | 16.941 |
| ATOM | 4477 | C    | PHE | A | 272 | 16.442 | 34.961 | 19.062 |
| ATOM | 4478 | O    | PHE | A | 272 | 17.016 | 34.615 | 20.103 |
| ATOM | 4479 | N    | PRO | A | 273 | 15.892 | 36.191 | 18.958 |
| ATOM | 4480 | CD   | PRO | A | 273 | 15.308 | 36.796 | 17.769 |
| ATOM | 4481 | HD2  | PRO | A | 273 | 14.281 | 36.446 | 17.646 |
| ATOM | 4482 | HD3  | PRO | A | 273 | 15.888 | 36.592 | 16.872 |
| ATOM | 4483 | CG   | PRO | A | 273 | 15.317 | 38.297 | 18.040 |
| ATOM | 4484 | HG2  | PRO | A | 273 | 14.534 | 38.809 | 17.486 |
| ATOM | 4485 | HG3  | PRO | A | 273 | 16.293 | 38.712 | 17.791 |
| ATOM | 4486 | CB   | PRO | A | 273 | 15.085 | 38.366 | 19.544 |
| ATOM | 4487 | HB2  | PRO | A | 273 | 14.016 | 38.268 | 19.738 |
| ATOM | 4488 | HB3  | PRO | A | 273 | 15.466 | 39.295 | 19.971 |
| ATOM | 4489 | CA   | PRO | A | 273 | 15.836 | 37.141 | 20.078 |
| ATOM | 4490 | HA   | PRO | A | 273 | 16.853 | 37.431 | 20.340 |
| ATOM | 4491 | C    | PRO | A | 273 | 15.120 | 36.581 | 21.317 |
| ATOM | 4492 | O    | PRO | A | 273 | 15.470 | 36.915 | 22.443 |
| ATOM | 4493 | N    | ASN | A | 274 | 14.151 | 35.686 | 21.103 |
| ATOM | 4494 | H    | ASN | A | 274 | 13.942 | 35.435 | 20.145 |
| ATOM | 4495 | CA   | ASN | A | 274 | 13.354 | 35.004 | 22.125 |
| ATOM | 4496 | HA   | ASN | A | 274 | 12.982 | 35.755 | 22.821 |
| ATOM | 4497 | CB   | ASN | A | 274 | 12.159 | 34.341 | 21.414 |

|      |      |      |     |   |     |        |        |        |
|------|------|------|-----|---|-----|--------|--------|--------|
| ATOM | 4498 | HB2  | ASN | A | 274 | 11.480 | 33.940 | 22.167 |
| ATOM | 4499 | HB3  | ASN | A | 274 | 11.610 | 35.084 | 20.837 |
| ATOM | 4500 | CG   | ASN | A | 274 | 12.582 | 33.225 | 20.461 |
| ATOM | 4501 | OD1  | ASN | A | 274 | 13.425 | 33.411 | 19.590 |
| ATOM | 4502 | ND2  | ASN | A | 274 | 12.035 | 32.037 | 20.604 |
| ATOM | 4503 | HD21 | ASN | A | 274 | 12.262 | 31.348 | 19.896 |
| ATOM | 4504 | HD22 | ASN | A | 274 | 11.305 | 31.853 | 21.276 |
| ATOM | 4505 | C    | ASN | A | 274 | 14.114 | 33.941 | 22.946 |
| ATOM | 4506 | O    | ASN | A | 274 | 13.599 | 33.486 | 23.975 |
| ATOM | 4507 | N    | ALA | A | 275 | 15.288 | 33.501 | 22.481 |
| ATOM | 4508 | H    | ALA | A | 275 | 15.665 | 33.948 | 21.655 |
| ATOM | 4509 | CA   | ALA | A | 275 | 16.056 | 32.407 | 23.069 |
| ATOM | 4510 | HA   | ALA | A | 275 | 15.365 | 31.688 | 23.508 |
| ATOM | 4511 | CB   | ALA | A | 275 | 16.825 | 31.705 | 21.949 |
| ATOM | 4512 | HB1  | ALA | A | 275 | 17.360 | 30.841 | 22.351 |
| ATOM | 4513 | HB2  | ALA | A | 275 | 16.130 | 31.375 | 21.177 |
| ATOM | 4514 | HB3  | ALA | A | 275 | 17.544 | 32.396 | 21.511 |
| ATOM | 4515 | C    | ALA | A | 275 | 17.007 | 32.886 | 24.170 |
| ATOM | 4516 | O    | ALA | A | 275 | 17.718 | 33.877 | 23.989 |
| ATOM | 4517 | N    | ASP | A | 276 | 17.060 | 32.144 | 25.275 |
| ATOM | 4518 | H    | ASP | A | 276 | 16.460 | 31.340 | 25.346 |
| ATOM | 4519 | CA   | ASP | A | 276 | 17.995 | 32.367 | 26.377 |
| ATOM | 4520 | HA   | ASP | A | 276 | 17.866 | 33.382 | 26.752 |
| ATOM | 4521 | CB   | ASP | A | 276 | 17.640 | 31.387 | 27.509 |
| ATOM | 4522 | HB2  | ASP | A | 276 | 16.555 | 31.373 | 27.622 |
| ATOM | 4523 | HB3  | ASP | A | 276 | 17.959 | 30.382 | 27.236 |
| ATOM | 4524 | CG   | ASP | A | 276 | 18.252 | 31.761 | 28.859 |
| ATOM | 4525 | OD1  | ASP | A | 276 | 19.441 | 32.143 | 28.908 |
| ATOM | 4526 | OD2  | ASP | A | 276 | 17.533 | 31.669 | 29.881 |
| ATOM | 4527 | C    | ASP | A | 276 | 19.448 | 32.197 | 25.901 |
| ATOM | 4528 | O    | ASP | A | 276 | 19.784 | 31.213 | 25.245 |
| ATOM | 4529 | N    | SER | A | 277 | 20.336 | 33.125 | 26.250 |
| ATOM | 4530 | H    | SER | A | 277 | 20.030 | 33.925 | 26.791 |
| ATOM | 4531 | CA   | SER | A | 277 | 21.773 | 33.048 | 25.954 |
| ATOM | 4532 | HA   | SER | A | 277 | 21.906 | 33.020 | 24.875 |
| ATOM | 4533 | CB   | SER | A | 277 | 22.468 | 34.325 | 26.450 |
| ATOM | 4534 | HB2  | SER | A | 277 | 23.552 | 34.203 | 26.398 |
| ATOM | 4535 | HB3  | SER | A | 277 | 22.181 | 35.147 | 25.793 |
| ATOM | 4536 | OG   | SER | A | 277 | 22.080 | 34.658 | 27.774 |
| ATOM | 4537 | HG   | SER | A | 277 | 21.962 | 35.630 | 27.812 |
| ATOM | 4538 | C    | SER | A | 277 | 22.438 | 31.777 | 26.524 |
| ATOM | 4539 | O    | SER | A | 277 | 23.454 | 31.309 | 25.999 |
| ATOM | 4540 | N    | LYS | A | 278 | 21.840 | 31.149 | 27.546 |
| ATOM | 4541 | H    | LYS | A | 278 | 21.021 | 31.592 | 27.962 |
| ATOM | 4542 | CA   | LYS | A | 278 | 22.232 | 29.837 | 28.070 |
| ATOM | 4543 | HA   | LYS | A | 278 | 23.317 | 29.819 | 28.190 |
| ATOM | 4544 | CB   | LYS | A | 278 | 21.573 | 29.667 | 29.453 |
| ATOM | 4545 | HB2  | LYS | A | 278 | 21.666 | 30.605 | 30.006 |
| ATOM | 4546 | HB3  | LYS | A | 278 | 20.510 | 29.442 | 29.333 |
| ATOM | 4547 | CG   | LYS | A | 278 | 22.257 | 28.563 | 30.266 |
| ATOM | 4548 | HG2  | LYS | A | 278 | 22.165 | 27.611 | 29.744 |
| ATOM | 4549 | HG3  | LYS | A | 278 | 23.317 | 28.804 | 30.356 |
| ATOM | 4550 | CD   | LYS | A | 278 | 21.648 | 28.433 | 31.667 |
| ATOM | 4551 | HD2  | LYS | A | 278 | 21.633 | 29.405 | 32.160 |
| ATOM | 4552 | HD3  | LYS | A | 278 | 20.630 | 28.051 | 31.590 |
| ATOM | 4553 | CE   | LYS | A | 278 | 22.520 | 27.465 | 32.459 |
| ATOM | 4554 | HE2  | LYS | A | 278 | 22.564 | 26.529 | 31.908 |

|      |      |      |     |   |     |        |        |        |
|------|------|------|-----|---|-----|--------|--------|--------|
| ATOM | 4555 | HE3  | LYS | A | 278 | 23.529 | 27.875 | 32.519 |
| ATOM | 4556 | NZ   | LYS | A | 278 | 22.015 | 27.210 | 33.822 |
| ATOM | 4557 | HZ1  | LYS | A | 278 | 21.112 | 26.746 | 33.810 |
| ATOM | 4558 | HZ2  | LYS | A | 278 | 22.637 | 26.586 | 34.323 |
| ATOM | 4559 | HZ3  | LYS | A | 278 | 21.917 | 28.074 | 34.348 |
| ATOM | 4560 | C    | LYS | A | 278 | 21.857 | 28.686 | 27.114 |
| ATOM | 4561 | O    | LYS | A | 278 | 22.652 | 27.772 | 26.905 |
| ATOM | 4562 | N    | ALA | A | 279 | 20.674 | 28.750 | 26.490 |
| ATOM | 4563 | H    | ALA | A | 279 | 20.114 | 29.578 | 26.642 |
| ATOM | 4564 | CA   | ALA | A | 279 | 20.231 | 27.811 | 25.449 |
| ATOM | 4565 | HA   | ALA | A | 279 | 20.343 | 26.786 | 25.808 |
| ATOM | 4566 | CB   | ALA | A | 279 | 18.748 | 28.081 | 25.141 |
| ATOM | 4567 | HB1  | ALA | A | 279 | 18.346 | 27.264 | 24.541 |
| ATOM | 4568 | HB2  | ALA | A | 279 | 18.173 | 28.161 | 26.061 |
| ATOM | 4569 | HB3  | ALA | A | 279 | 18.630 | 29.010 | 24.583 |
| ATOM | 4570 | C    | ALA | A | 279 | 21.071 | 27.963 | 24.173 |
| ATOM | 4571 | O    | ALA | A | 279 | 21.468 | 26.982 | 23.544 |
| ATOM | 4572 | N    | LEU | A | 280 | 21.367 | 29.213 | 23.814 |
| ATOM | 4573 | H    | LEU | A | 280 | 20.965 | 29.964 | 24.363 |
| ATOM | 4574 | CA   | LEU | A | 280 | 22.123 | 29.574 | 22.623 |
| ATOM | 4575 | HA   | LEU | A | 280 | 21.693 | 29.063 | 21.765 |
| ATOM | 4576 | CB   | LEU | A | 280 | 21.990 | 31.095 | 22.429 |
| ATOM | 4577 | HB2  | LEU | A | 280 | 22.233 | 31.589 | 23.365 |
| ATOM | 4578 | HB3  | LEU | A | 280 | 22.740 | 31.414 | 21.722 |
| ATOM | 4579 | CG   | LEU | A | 280 | 20.619 | 31.589 | 21.917 |
| ATOM | 4580 | HG   | LEU | A | 280 | 19.871 | 31.413 | 22.684 |
| ATOM | 4581 | CD1  | LEU | A | 280 | 20.680 | 33.096 | 21.645 |
| ATOM | 4582 | HD11 | LEU | A | 280 | 20.934 | 33.632 | 22.559 |
| ATOM | 4583 | HD12 | LEU | A | 280 | 21.423 | 33.308 | 20.878 |
| ATOM | 4584 | HD13 | LEU | A | 280 | 19.711 | 33.442 | 21.291 |
| ATOM | 4585 | CD2  | LEU | A | 280 | 20.168 | 30.867 | 20.639 |
| ATOM | 4586 | HD21 | LEU | A | 280 | 19.895 | 29.838 | 20.867 |
| ATOM | 4587 | HD22 | LEU | A | 280 | 19.294 | 31.360 | 20.217 |
| ATOM | 4588 | HD23 | LEU | A | 280 | 20.973 | 30.883 | 19.905 |
| ATOM | 4589 | C    | LEU | A | 280 | 23.583 | 29.099 | 22.668 |
| ATOM | 4590 | O    | LEU | A | 280 | 24.134 | 28.774 | 21.614 |
| ATOM | 4591 | N    | ASP | A | 281 | 24.201 | 28.986 | 23.849 |
| ATOM | 4592 | H    | ASP | A | 281 | 23.725 | 29.314 | 24.680 |
| ATOM | 4593 | CA   | ASP | A | 281 | 25.537 | 28.385 | 23.988 |
| ATOM | 4594 | HA   | ASP | A | 281 | 26.220 | 28.934 | 23.336 |
| ATOM | 4595 | CB   | ASP | A | 281 | 26.037 | 28.515 | 25.437 |
| ATOM | 4596 | HB2  | ASP | A | 281 | 25.913 | 29.551 | 25.761 |
| ATOM | 4597 | HB3  | ASP | A | 281 | 25.449 | 27.865 | 26.090 |
| ATOM | 4598 | CG   | ASP | A | 281 | 27.520 | 28.139 | 25.521 |
| ATOM | 4599 | OD1  | ASP | A | 281 | 27.856 | 27.009 | 25.950 |
| ATOM | 4600 | OD2  | ASP | A | 281 | 28.346 | 28.973 | 25.087 |
| ATOM | 4601 | C    | ASP | A | 281 | 25.562 | 26.907 | 23.549 |
| ATOM | 4602 | O    | ASP | A | 281 | 26.547 | 26.455 | 22.963 |
| ATOM | 4603 | N    | LEU | A | 282 | 24.468 | 26.171 | 23.785 |
| ATOM | 4604 | H    | LEU | A | 282 | 23.680 | 26.613 | 24.242 |
| ATOM | 4605 | CA   | LEU | A | 282 | 24.296 | 24.797 | 23.314 |
| ATOM | 4606 | HA   | LEU | A | 282 | 25.251 | 24.284 | 23.410 |
| ATOM | 4607 | CB   | LEU | A | 282 | 23.260 | 24.086 | 24.207 |
| ATOM | 4608 | HB2  | LEU | A | 282 | 23.560 | 24.187 | 25.248 |
| ATOM | 4609 | HB3  | LEU | A | 282 | 22.298 | 24.585 | 24.096 |
| ATOM | 4610 | CG   | LEU | A | 282 | 23.070 | 22.588 | 23.899 |
| ATOM | 4611 | HG   | LEU | A | 282 | 22.720 | 22.478 | 22.872 |

|      |      |      |     |   |     |        |        |        |
|------|------|------|-----|---|-----|--------|--------|--------|
| ATOM | 4612 | CD1  | LEU | A | 282 | 24.371 | 21.789 | 24.065 |
| ATOM | 4613 | HD11 | LEU | A | 282 | 25.107 | 22.103 | 23.325 |
| ATOM | 4614 | HD12 | LEU | A | 282 | 24.776 | 21.933 | 25.067 |
| ATOM | 4615 | HD13 | LEU | A | 282 | 24.174 | 20.730 | 23.913 |
| ATOM | 4616 | CD2  | LEU | A | 282 | 21.993 | 22.017 | 24.830 |
| ATOM | 4617 | HD21 | LEU | A | 282 | 21.809 | 20.971 | 24.585 |
| ATOM | 4618 | HD22 | LEU | A | 282 | 22.317 | 22.090 | 25.868 |
| ATOM | 4619 | HD23 | LEU | A | 282 | 21.067 | 22.576 | 24.703 |
| ATOM | 4620 | C    | LEU | A | 282 | 23.911 | 24.758 | 21.829 |
| ATOM | 4621 | O    | LEU | A | 282 | 24.440 | 23.922 | 21.098 |
| ATOM | 4622 | N    | LEU | A | 283 | 23.037 | 25.667 | 21.372 |
| ATOM | 4623 | H    | LEU | A | 283 | 22.615 | 26.293 | 22.050 |
| ATOM | 4624 | CA   | LEU | A | 283 | 22.598 | 25.742 | 19.971 |
| ATOM | 4625 | HA   | LEU | A | 283 | 22.098 | 24.803 | 19.727 |
| ATOM | 4626 | CB   | LEU | A | 283 | 21.613 | 26.917 | 19.791 |
| ATOM | 4627 | HB2  | LEU | A | 283 | 20.833 | 26.857 | 20.552 |
| ATOM | 4628 | HB3  | LEU | A | 283 | 22.162 | 27.848 | 19.940 |
| ATOM | 4629 | CG   | LEU | A | 283 | 20.952 | 26.957 | 18.393 |
| ATOM | 4630 | HG   | LEU | A | 283 | 21.715 | 26.837 | 17.624 |
| ATOM | 4631 | CD1  | LEU | A | 283 | 19.911 | 25.840 | 18.228 |
| ATOM | 4632 | HD11 | LEU | A | 283 | 19.142 | 25.933 | 18.996 |
| ATOM | 4633 | HD12 | LEU | A | 283 | 19.439 | 25.914 | 17.249 |
| ATOM | 4634 | HD13 | LEU | A | 283 | 20.385 | 24.862 | 18.306 |
| ATOM | 4635 | CD2  | LEU | A | 283 | 20.275 | 28.313 | 18.155 |
| ATOM | 4636 | HD21 | LEU | A | 283 | 19.488 | 28.477 | 18.891 |
| ATOM | 4637 | HD22 | LEU | A | 283 | 21.015 | 29.111 | 18.225 |
| ATOM | 4638 | HD23 | LEU | A | 283 | 19.840 | 28.336 | 17.156 |
| ATOM | 4639 | C    | LEU | A | 283 | 23.790 | 25.876 | 19.015 |
| ATOM | 4640 | O    | LEU | A | 283 | 23.878 | 25.121 | 18.055 |
| ATOM | 4641 | N    | ASP | A | 284 | 24.722 | 26.788 | 19.301 |
| ATOM | 4642 | H    | ASP | A | 284 | 24.584 | 27.346 | 20.136 |
| ATOM | 4643 | CA   | ASP | A | 284 | 25.937 | 27.036 | 18.503 |
| ATOM | 4644 | HA   | ASP | A | 284 | 25.651 | 27.215 | 17.465 |
| ATOM | 4645 | CB   | ASP | A | 284 | 26.579 | 28.320 | 19.055 |
| ATOM | 4646 | HB2  | ASP | A | 284 | 25.915 | 29.158 | 18.852 |
| ATOM | 4647 | HB3  | ASP | A | 284 | 26.663 | 28.233 | 20.137 |
| ATOM | 4648 | CG   | ASP | A | 284 | 27.956 | 28.634 | 18.467 |
| ATOM | 4649 | OD1  | ASP | A | 284 | 28.027 | 29.096 | 17.304 |
| ATOM | 4650 | OD2  | ASP | A | 284 | 28.962 | 28.441 | 19.192 |
| ATOM | 4651 | C    | ASP | A | 284 | 26.932 | 25.851 | 18.494 |
| ATOM | 4652 | O    | ASP | A | 284 | 27.784 | 25.763 | 17.610 |
| ATOM | 4653 | N    | LYS | A | 285 | 26.811 | 24.925 | 19.453 |
| ATOM | 4654 | H    | LYS | A | 285 | 26.073 | 25.047 | 20.136 |
| ATOM | 4655 | CA   | LYS | A | 285 | 27.599 | 23.685 | 19.526 |
| ATOM | 4656 | HA   | LYS | A | 285 | 28.513 | 23.801 | 18.943 |
| ATOM | 4657 | CB   | LYS | A | 285 | 28.005 | 23.431 | 20.987 |
| ATOM | 4658 | HB2  | LYS | A | 285 | 27.116 | 23.368 | 21.617 |
| ATOM | 4659 | HB3  | LYS | A | 285 | 28.529 | 22.483 | 21.033 |
| ATOM | 4660 | CG   | LYS | A | 285 | 28.955 | 24.502 | 21.532 |
| ATOM | 4661 | HG2  | LYS | A | 285 | 29.811 | 24.600 | 20.865 |
| ATOM | 4662 | HG3  | LYS | A | 285 | 28.428 | 25.447 | 21.574 |
| ATOM | 4663 | CD   | LYS | A | 285 | 29.458 | 24.125 | 22.931 |
| ATOM | 4664 | HD2  | LYS | A | 285 | 28.619 | 24.010 | 23.618 |
| ATOM | 4665 | HD3  | LYS | A | 285 | 29.977 | 23.169 | 22.859 |
| ATOM | 4666 | CE   | LYS | A | 285 | 30.447 | 25.160 | 23.473 |
| ATOM | 4667 | HE2  | LYS | A | 285 | 31.013 | 24.711 | 24.293 |
| ATOM | 4668 | HE3  | LYS | A | 285 | 31.157 | 25.412 | 22.681 |

|      |      |      |     |   |     |        |        |        |
|------|------|------|-----|---|-----|--------|--------|--------|
| ATOM | 4669 | NZ   | LYS | A | 285 | 29.785 | 26.390 | 23.957 |
| ATOM | 4670 | HZ1  | LYS | A | 285 | 29.133 | 26.219 | 24.717 |
| ATOM | 4671 | HZ2  | LYS | A | 285 | 30.471 | 27.058 | 24.295 |
| ATOM | 4672 | HZ3  | LYS | A | 285 | 29.285 | 26.860 | 23.210 |
| ATOM | 4673 | C    | LYS | A | 285 | 26.876 | 22.457 | 18.931 |
| ATOM | 4674 | O    | LYS | A | 285 | 27.504 | 21.417 | 18.714 |
| ATOM | 4675 | N    | MET | A | 286 | 25.567 | 22.554 | 18.667 |
| ATOM | 4676 | H    | MET | A | 286 | 25.111 | 23.420 | 18.935 |
| ATOM | 4677 | CA   | MET | A | 286 | 24.782 | 21.545 | 17.937 |
| ATOM | 4678 | HA   | MET | A | 286 | 25.276 | 20.574 | 17.989 |
| ATOM | 4679 | CB   | MET | A | 286 | 23.379 | 21.405 | 18.545 |
| ATOM | 4680 | HB2  | MET | A | 286 | 22.889 | 22.379 | 18.596 |
| ATOM | 4681 | HB3  | MET | A | 286 | 22.795 | 20.756 | 17.893 |
| ATOM | 4682 | CG   | MET | A | 286 | 23.379 | 20.763 | 19.931 |
| ATOM | 4683 | HG2  | MET | A | 286 | 23.864 | 19.790 | 19.860 |
| ATOM | 4684 | HG3  | MET | A | 286 | 23.945 | 21.387 | 20.625 |
| ATOM | 4685 | SD   | MET | A | 286 | 21.702 | 20.534 | 20.570 |
| ATOM | 4686 | CE   | MET | A | 286 | 22.032 | 19.278 | 21.820 |
| ATOM | 4687 | HE1  | MET | A | 286 | 22.749 | 19.656 | 22.543 |
| ATOM | 4688 | HE2  | MET | A | 286 | 21.105 | 19.029 | 22.329 |
| ATOM | 4689 | HE3  | MET | A | 286 | 22.430 | 18.384 | 21.345 |
| ATOM | 4690 | C    | MET | A | 286 | 24.669 | 21.903 | 16.453 |
| ATOM | 4691 | O    | MET | A | 286 | 25.015 | 21.097 | 15.594 |
| ATOM | 4692 | N    | LEU | A | 287 | 24.229 | 23.120 | 16.133 |
| ATOM | 4693 | H    | LEU | A | 287 | 24.013 | 23.764 | 16.887 |
| ATOM | 4694 | CA   | LEU | A | 287 | 24.271 | 23.674 | 14.785 |
| ATOM | 4695 | HA   | LEU | A | 287 | 24.121 | 22.882 | 14.048 |
| ATOM | 4696 | CB   | LEU | A | 287 | 23.158 | 24.728 | 14.618 |
| ATOM | 4697 | HB2  | LEU | A | 287 | 23.306 | 25.521 | 15.353 |
| ATOM | 4698 | HB3  | LEU | A | 287 | 23.260 | 25.172 | 13.628 |
| ATOM | 4699 | CG   | LEU | A | 287 | 21.721 | 24.191 | 14.765 |
| ATOM | 4700 | HG   | LEU | A | 287 | 21.575 | 23.833 | 15.785 |
| ATOM | 4701 | CD1  | LEU | A | 287 | 20.724 | 25.331 | 14.520 |
| ATOM | 4702 | HD11 | LEU | A | 287 | 19.709 | 24.967 | 14.676 |
| ATOM | 4703 | HD12 | LEU | A | 287 | 20.915 | 26.149 | 15.215 |
| ATOM | 4704 | HD13 | LEU | A | 287 | 20.816 | 25.702 | 13.500 |
| ATOM | 4705 | CD2  | LEU | A | 287 | 21.445 | 23.034 | 13.795 |
| ATOM | 4706 | HD21 | LEU | A | 287 | 20.379 | 22.819 | 13.776 |
| ATOM | 4707 | HD22 | LEU | A | 287 | 21.769 | 23.297 | 12.789 |
| ATOM | 4708 | HD23 | LEU | A | 287 | 21.975 | 22.138 | 14.118 |
| ATOM | 4709 | C    | LEU | A | 287 | 25.666 | 24.262 | 14.564 |
| ATOM | 4710 | O    | LEU | A | 287 | 25.918 | 25.426 | 14.875 |
| ATOM | 4711 | N    | THR | A | 288 | 26.579 | 23.448 | 14.030 |
| ATOM | 4712 | H    | THR | A | 288 | 26.304 | 22.490 | 13.866 |
| ATOM | 4713 | CA   | THR | A | 288 | 27.994 | 23.790 | 13.823 |
| ATOM | 4714 | HA   | THR | A | 288 | 28.122 | 24.869 | 13.832 |
| ATOM | 4715 | CB   | THR | A | 288 | 28.849 | 23.198 | 14.950 |
| ATOM | 4716 | HB   | THR | A | 288 | 28.989 | 22.136 | 14.770 |
| ATOM | 4717 | CG2  | THR | A | 288 | 30.217 | 23.852 | 15.030 |
| ATOM | 4718 | HG21 | THR | A | 288 | 30.117 | 24.915 | 15.253 |
| ATOM | 4719 | HG22 | THR | A | 288 | 30.798 | 23.375 | 15.818 |
| ATOM | 4720 | HG23 | THR | A | 288 | 30.751 | 23.729 | 14.089 |
| ATOM | 4721 | OG1  | THR | A | 288 | 28.220 | 23.358 | 16.202 |
| ATOM | 4722 | HG1  | THR | A | 288 | 28.215 | 24.300 | 16.442 |
| ATOM | 4723 | C    | THR | A | 288 | 28.446 | 23.257 | 12.469 |
| ATOM | 4724 | O    | THR | A | 288 | 28.188 | 22.092 | 12.160 |
| ATOM | 4725 | N    | PHE | A | 289 | 29.098 | 24.088 | 11.650 |

|      |      |      |     |   |     |        |        |        |
|------|------|------|-----|---|-----|--------|--------|--------|
| ATOM | 4726 | H    | PHE | A | 289 | 29.318 | 25.026 | 11.966 |
| ATOM | 4727 | CA   | PHE | A | 289 | 29.589 | 23.647 | 10.339 |
| ATOM | 4728 | HA   | PHE | A | 289 | 28.784 | 23.123 | 9.824  |
| ATOM | 4729 | CB   | PHE | A | 289 | 29.998 | 24.850 | 9.475  |
| ATOM | 4730 | HB2  | PHE | A | 289 | 29.117 | 25.463 | 9.295  |
| ATOM | 4731 | HB3  | PHE | A | 289 | 30.707 | 25.469 | 10.018 |
| ATOM | 4732 | CG   | PHE | A | 289 | 30.615 | 24.479 | 8.137  |
| ATOM | 4733 | CD1  | PHE | A | 289 | 29.804 | 24.366 | 6.992  |
| ATOM | 4734 | HD1  | PHE | A | 289 | 28.740 | 24.545 | 7.060  |
| ATOM | 4735 | CE1  | PHE | A | 289 | 30.376 | 24.045 | 5.748  |
| ATOM | 4736 | HE1  | PHE | A | 289 | 29.749 | 23.967 | 4.870  |
| ATOM | 4737 | CZ   | PHE | A | 289 | 31.761 | 23.831 | 5.644  |
| ATOM | 4738 | HZ   | PHE | A | 289 | 32.197 | 23.581 | 4.687  |
| ATOM | 4739 | CE2  | PHE | A | 289 | 32.576 | 23.938 | 6.784  |
| ATOM | 4740 | HE2  | PHE | A | 289 | 33.641 | 23.764 | 6.707  |
| ATOM | 4741 | CD2  | PHE | A | 289 | 32.005 | 24.265 | 8.028  |
| ATOM | 4742 | HD2  | PHE | A | 289 | 32.639 | 24.351 | 8.899  |
| ATOM | 4743 | C    | PHE | A | 289 | 30.733 | 22.642 | 10.510 |
| ATOM | 4744 | O    | PHE | A | 289 | 30.651 | 21.534 | 9.988  |
| ATOM | 4745 | N    | ASN | A | 290 | 31.768 | 23.002 | 11.276 |
| ATOM | 4746 | H    | ASN | A | 290 | 31.773 | 23.934 | 11.678 |
| ATOM | 4747 | CA   | ASN | A | 290 | 32.881 | 22.112 | 11.597 |
| ATOM | 4748 | HA   | ASN | A | 290 | 33.297 | 21.744 | 10.660 |
| ATOM | 4749 | CB   | ASN | A | 290 | 33.987 | 22.938 | 12.272 |
| ATOM | 4750 | HB2  | ASN | A | 290 | 34.246 | 23.768 | 11.615 |
| ATOM | 4751 | HB3  | ASN | A | 290 | 33.621 | 23.353 | 13.211 |
| ATOM | 4752 | CG   | ASN | A | 290 | 35.250 | 22.129 | 12.548 |
| ATOM | 4753 | OD1  | ASN | A | 290 | 35.216 | 20.918 | 12.716 |
| ATOM | 4754 | ND2  | ASN | A | 290 | 36.396 | 22.777 | 12.588 |
| ATOM | 4755 | HD21 | ASN | A | 290 | 37.241 | 22.240 | 12.724 |
| ATOM | 4756 | HD22 | ASN | A | 290 | 36.436 | 23.768 | 12.373 |
| ATOM | 4757 | C    | ASN | A | 290 | 32.397 | 20.925 | 12.473 |
| ATOM | 4758 | O    | ASN | A | 290 | 32.038 | 21.147 | 13.635 |
| ATOM | 4759 | N    | PRO | A | 291 | 32.399 | 19.671 | 11.966 |
| ATOM | 4760 | CD   | PRO | A | 291 | 32.798 | 19.261 | 10.626 |
| ATOM | 4761 | HD2  | PRO | A | 291 | 33.871 | 19.076 | 10.610 |
| ATOM | 4762 | HD3  | PRO | A | 291 | 32.539 | 19.990 | 9.860  |
| ATOM | 4763 | CG   | PRO | A | 291 | 32.039 | 17.971 | 10.361 |
| ATOM | 4764 | HG2  | PRO | A | 291 | 32.570 | 17.334 | 9.655  |
| ATOM | 4765 | HG3  | PRO | A | 291 | 31.042 | 18.219 | 9.998  |
| ATOM | 4766 | CB   | PRO | A | 291 | 31.931 | 17.325 | 11.738 |
| ATOM | 4767 | HB2  | PRO | A | 291 | 32.807 | 16.696 | 11.906 |
| ATOM | 4768 | HB3  | PRO | A | 291 | 31.023 | 16.728 | 11.825 |
| ATOM | 4769 | CA   | PRO | A | 291 | 31.919 | 18.509 | 12.716 |
| ATOM | 4770 | HA   | PRO | A | 291 | 30.895 | 18.694 | 13.044 |
| ATOM | 4771 | C    | PRO | A | 291 | 32.793 | 18.187 | 13.929 |
| ATOM | 4772 | O    | PRO | A | 291 | 32.284 | 17.741 | 14.952 |
| ATOM | 4773 | N    | HIE | A | 292 | 34.103 | 18.431 | 13.840 |
| ATOM | 4774 | H    | HIE | A | 292 | 34.468 | 18.898 | 13.018 |
| ATOM | 4775 | CA   | HIE | A | 292 | 35.086 | 18.057 | 14.861 |
| ATOM | 4776 | HA   | HIE | A | 292 | 34.850 | 17.056 | 15.214 |
| ATOM | 4777 | CB   | HIE | A | 292 | 36.481 | 18.016 | 14.206 |
| ATOM | 4778 | HB2  | HIE | A | 292 | 36.723 | 18.997 | 13.797 |
| ATOM | 4779 | HB3  | HIE | A | 292 | 37.217 | 17.797 | 14.979 |
| ATOM | 4780 | CG   | HIE | A | 292 | 36.635 | 16.985 | 13.114 |
| ATOM | 4781 | ND1  | HIE | A | 292 | 37.475 | 15.868 | 13.165 |
| ATOM | 4782 | CE1  | HIE | A | 292 | 37.262 | 15.202 | 12.016 |

|      |      |      |     |   |     |        |        |        |
|------|------|------|-----|---|-----|--------|--------|--------|
| ATOM | 4783 | HE1  | HIE | A | 292 | 37.744 | 14.275 | 11.741 |
| ATOM | 4784 | NE2  | HIE | A | 292 | 36.359 | 15.839 | 11.254 |
| ATOM | 4785 | HE2  | HIE | A | 292 | 35.979 | 15.511 | 10.367 |
| ATOM | 4786 | CD2  | HIE | A | 292 | 35.969 | 16.972 | 11.923 |
| ATOM | 4787 | HD2  | HIE | A | 292 | 35.245 | 17.690 | 11.586 |
| ATOM | 4788 | C    | HIE | A | 292 | 35.036 | 18.990 | 16.089 |
| ATOM | 4789 | O    | HIE | A | 292 | 35.447 | 18.610 | 17.189 |
| ATOM | 4790 | N    | LYS | A | 293 | 34.476 | 20.194 | 15.911 |
| ATOM | 4791 | H    | LYS | A | 293 | 34.229 | 20.431 | 14.958 |
| ATOM | 4792 | CA   | LYS | A | 293 | 34.123 | 21.149 | 16.972 |
| ATOM | 4793 | HA   | LYS | A | 293 | 34.769 | 20.987 | 17.837 |
| ATOM | 4794 | CB   | LYS | A | 293 | 34.369 | 22.573 | 16.446 |
| ATOM | 4795 | HB2  | LYS | A | 293 | 33.837 | 22.689 | 15.499 |
| ATOM | 4796 | HB3  | LYS | A | 293 | 33.946 | 23.283 | 17.159 |
| ATOM | 4797 | CG   | LYS | A | 293 | 35.851 | 22.940 | 16.259 |
| ATOM | 4798 | HG2  | LYS | A | 293 | 36.350 | 22.900 | 17.225 |
| ATOM | 4799 | HG3  | LYS | A | 293 | 36.328 | 22.228 | 15.585 |
| ATOM | 4800 | CD   | LYS | A | 293 | 35.955 | 24.356 | 15.681 |
| ATOM | 4801 | HD2  | LYS | A | 293 | 35.433 | 24.355 | 14.728 |
| ATOM | 4802 | HD3  | LYS | A | 293 | 35.478 | 25.054 | 16.372 |
| ATOM | 4803 | CE   | LYS | A | 293 | 37.399 | 24.798 | 15.454 |
| ATOM | 4804 | HE2  | LYS | A | 293 | 37.937 | 23.972 | 14.994 |
| ATOM | 4805 | HE3  | LYS | A | 293 | 37.866 | 25.000 | 16.418 |
| ATOM | 4806 | NZ   | LYS | A | 293 | 37.488 | 26.001 | 14.590 |
| ATOM | 4807 | HZ1  | LYS | A | 293 | 38.448 | 26.314 | 14.488 |
| ATOM | 4808 | HZ2  | LYS | A | 293 | 37.139 | 25.810 | 13.658 |
| ATOM | 4809 | HZ3  | LYS | A | 293 | 36.950 | 26.766 | 14.985 |
| ATOM | 4810 | C    | LYS | A | 293 | 32.659 | 21.014 | 17.460 |
| ATOM | 4811 | O    | LYS | A | 293 | 32.325 | 21.572 | 18.513 |
| ATOM | 4812 | N    | ARG | A | 294 | 31.789 | 20.306 | 16.726 |
| ATOM | 4813 | H    | ARG | A | 294 | 32.143 | 19.892 | 15.873 |
| ATOM | 4814 | CA   | ARG | A | 294 | 30.377 | 20.038 | 17.071 |
| ATOM | 4815 | HA   | ARG | A | 294 | 29.913 | 20.988 | 17.339 |
| ATOM | 4816 | CB   | ARG | A | 294 | 29.688 | 19.507 | 15.798 |
| ATOM | 4817 | HB2  | ARG | A | 294 | 30.074 | 20.087 | 14.960 |
| ATOM | 4818 | HB3  | ARG | A | 294 | 29.971 | 18.472 | 15.625 |
| ATOM | 4819 | CG   | ARG | A | 294 | 28.157 | 19.618 | 15.766 |
| ATOM | 4820 | HG2  | ARG | A | 294 | 27.705 | 18.785 | 16.303 |
| ATOM | 4821 | HG3  | ARG | A | 294 | 27.861 | 20.547 | 16.248 |
| ATOM | 4822 | CD   | ARG | A | 294 | 27.644 | 19.667 | 14.316 |
| ATOM | 4823 | HD2  | ARG | A | 294 | 26.609 | 19.993 | 14.313 |
| ATOM | 4824 | HD3  | ARG | A | 294 | 28.227 | 20.403 | 13.775 |
| ATOM | 4825 | NE   | ARG | A | 294 | 27.701 | 18.381 | 13.613 |
| ATOM | 4826 | HE   | ARG | A | 294 | 27.374 | 17.571 | 14.127 |
| ATOM | 4827 | CZ   | ARG | A | 294 | 27.956 | 18.186 | 12.322 |
| ATOM | 4828 | NH1  | ARG | A | 294 | 28.336 | 19.122 | 11.476 |
| ATOM | 4829 | HH11 | ARG | A | 294 | 28.416 | 20.095 | 11.750 |
| ATOM | 4830 | HH12 | ARG | A | 294 | 28.497 | 18.845 | 10.504 |
| ATOM | 4831 | NH2  | ARG | A | 294 | 27.805 | 16.977 | 11.848 |
| ATOM | 4832 | HH21 | ARG | A | 294 | 27.433 | 16.250 | 12.435 |
| ATOM | 4833 | HH22 | ARG | A | 294 | 28.043 | 16.757 | 10.874 |
| ATOM | 4834 | C    | ARG | A | 294 | 30.273 | 19.090 | 18.285 |
| ATOM | 4835 | O    | ARG | A | 294 | 31.212 | 18.339 | 18.548 |
| ATOM | 4836 | N    | ILE | A | 295 | 29.201 | 19.149 | 19.079 |
| ATOM | 4837 | H    | ILE | A | 295 | 28.488 | 19.834 | 18.842 |
| ATOM | 4838 | CA   | ILE | A | 295 | 29.165 | 18.540 | 20.434 |
| ATOM | 4839 | HA   | ILE | A | 295 | 30.157 | 18.691 | 20.862 |

|      |      |      |     |   |     |        |        |        |
|------|------|------|-----|---|-----|--------|--------|--------|
| ATOM | 4840 | CB   | ILE | A | 295 | 28.182 | 19.340 | 21.334 |
| ATOM | 4841 | HB   | ILE | A | 295 | 28.337 | 20.385 | 21.091 |
| ATOM | 4842 | CG2  | ILE | A | 295 | 26.706 | 19.034 | 21.032 |
| ATOM | 4843 | HG21 | ILE | A | 295 | 26.476 | 17.991 | 21.248 |
| ATOM | 4844 | HG22 | ILE | A | 295 | 26.055 | 19.674 | 21.627 |
| ATOM | 4845 | HG23 | ILE | A | 295 | 26.502 | 19.245 | 19.986 |
| ATOM | 4846 | CG1  | ILE | A | 295 | 28.496 | 19.211 | 22.842 |
| ATOM | 4847 | HG12 | ILE | A | 295 | 28.078 | 18.283 | 23.226 |
| ATOM | 4848 | HG13 | ILE | A | 295 | 29.578 | 19.195 | 22.987 |
| ATOM | 4849 | CD1  | ILE | A | 295 | 27.938 | 20.365 | 23.683 |
| ATOM | 4850 | HD11 | ILE | A | 295 | 28.342 | 21.314 | 23.331 |
| ATOM | 4851 | HD12 | ILE | A | 295 | 26.852 | 20.387 | 23.628 |
| ATOM | 4852 | HD13 | ILE | A | 295 | 28.227 | 20.228 | 24.725 |
| ATOM | 4853 | C    | ILE | A | 295 | 28.969 | 17.007 | 20.454 |
| ATOM | 4854 | O    | ILE | A | 295 | 28.739 | 16.373 | 19.426 |
| ATOM | 4855 | N    | GLU | A | 296 | 29.079 | 16.391 | 21.630 |
| ATOM | 4856 | H    | GLU | A | 296 | 29.226 | 16.961 | 22.447 |
| ATOM | 4857 | CA   | GLU | A | 296 | 28.793 | 14.972 | 21.886 |
| ATOM | 4858 | HA   | GLU | A | 296 | 28.391 | 14.509 | 20.992 |
| ATOM | 4859 | CB   | GLU | A | 296 | 30.080 | 14.234 | 22.293 |
| ATOM | 4860 | HB2  | GLU | A | 296 | 30.461 | 14.678 | 23.211 |
| ATOM | 4861 | HB3  | GLU | A | 296 | 29.811 | 13.201 | 22.503 |
| ATOM | 4862 | CG   | GLU | A | 296 | 31.196 | 14.240 | 21.223 |
| ATOM | 4863 | HG2  | GLU | A | 296 | 30.823 | 13.750 | 20.325 |
| ATOM | 4864 | HG3  | GLU | A | 296 | 31.464 | 15.267 | 20.970 |
| ATOM | 4865 | CD   | GLU | A | 296 | 32.468 | 13.507 | 21.669 |
| ATOM | 4866 | OE1  | GLU | A | 296 | 32.471 | 12.897 | 22.759 |
| ATOM | 4867 | OE2  | GLU | A | 296 | 33.484 | 13.491 | 20.935 |
| ATOM | 4868 | C    | GLU | A | 296 | 27.726 | 14.861 | 22.990 |
| ATOM | 4869 | O    | GLU | A | 296 | 27.661 | 15.738 | 23.849 |
| ATOM | 4870 | N    | VAL | A | 297 | 26.884 | 13.819 | 22.993 |
| ATOM | 4871 | H    | VAL | A | 297 | 27.026 | 13.078 | 22.300 |
| ATOM | 4872 | CA   | VAL | A | 297 | 25.675 | 13.748 | 23.852 |
| ATOM | 4873 | HA   | VAL | A | 297 | 25.019 | 14.563 | 23.539 |
| ATOM | 4874 | CB   | VAL | A | 297 | 24.896 | 12.427 | 23.635 |
| ATOM | 4875 | HB   | VAL | A | 297 | 25.606 | 11.601 | 23.623 |
| ATOM | 4876 | CG1  | VAL | A | 297 | 23.851 | 12.145 | 24.727 |
| ATOM | 4877 | HG11 | VAL | A | 297 | 24.342 | 11.889 | 25.667 |
| ATOM | 4878 | HG12 | VAL | A | 297 | 23.214 | 13.018 | 24.871 |
| ATOM | 4879 | HG13 | VAL | A | 297 | 23.233 | 11.304 | 24.425 |
| ATOM | 4880 | CG2  | VAL | A | 297 | 24.148 | 12.457 | 22.293 |
| ATOM | 4881 | HG21 | VAL | A | 297 | 23.628 | 11.512 | 22.136 |
| ATOM | 4882 | HG22 | VAL | A | 297 | 23.422 | 13.270 | 22.294 |
| ATOM | 4883 | HG23 | VAL | A | 297 | 24.842 | 12.604 | 21.473 |
| ATOM | 4884 | C    | VAL | A | 297 | 25.987 | 13.943 | 25.347 |
| ATOM | 4885 | O    | VAL | A | 297 | 25.267 | 14.666 | 26.032 |
| ATOM | 4886 | N    | GLU | A | 298 | 27.070 | 13.340 | 25.846 |
| ATOM | 4887 | H    | GLU | A | 298 | 27.581 | 12.722 | 25.217 |
| ATOM | 4888 | CA   | GLU | A | 298 | 27.534 | 13.476 | 27.238 |
| ATOM | 4889 | HA   | GLU | A | 298 | 26.731 | 13.177 | 27.914 |
| ATOM | 4890 | CB   | GLU | A | 298 | 28.765 | 12.589 | 27.534 |
| ATOM | 4891 | HB2  | GLU | A | 298 | 29.667 | 13.072 | 27.160 |
| ATOM | 4892 | HB3  | GLU | A | 298 | 28.879 | 12.525 | 28.617 |
| ATOM | 4893 | CG   | GLU | A | 298 | 28.723 | 11.165 | 26.972 |
| ATOM | 4894 | HG2  | GLU | A | 298 | 29.367 | 10.524 | 27.574 |
| ATOM | 4895 | HG3  | GLU | A | 298 | 27.706 | 10.774 | 27.020 |
| ATOM | 4896 | CD   | GLU | A | 298 | 29.243 | 11.161 | 25.541 |



|      |      |      |     |   |     |        |        |        |
|------|------|------|-----|---|-----|--------|--------|--------|
| ATOM | 4897 | OE1  | GLU | A | 298 | 30.477 | 11.178 | 25.348 |
| ATOM | 4898 | OE2  | GLU | A | 298 | 28.422 | 11.256 | 24.605 |
| ATOM | 4899 | C    | GLU | A | 298 | 27.914 | 14.927 | 27.555 |
| ATOM | 4900 | O    | GLU | A | 298 | 27.593 | 15.442 | 28.620 |
| ATOM | 4901 | N    | GLN | A | 299 | 28.562 | 15.597 | 26.601 |
| ATOM | 4902 | H    | GLN | A | 299 | 28.649 | 15.153 | 25.697 |
| ATOM | 4903 | CA   | GLN | A | 299 | 29.036 | 16.974 | 26.726 |
| ATOM | 4904 | HA   | GLN | A | 299 | 29.532 | 17.100 | 27.690 |
| ATOM | 4905 | CB   | GLN | A | 299 | 30.039 | 17.266 | 25.590 |
| ATOM | 4906 | HB2  | GLN | A | 299 | 29.546 | 17.169 | 24.627 |
| ATOM | 4907 | HB3  | GLN | A | 299 | 30.388 | 18.291 | 25.677 |
| ATOM | 4908 | CG   | GLN | A | 299 | 31.263 | 16.337 | 25.613 |
| ATOM | 4909 | HG2  | GLN | A | 299 | 31.796 | 16.475 | 26.551 |
| ATOM | 4910 | HG3  | GLN | A | 299 | 30.935 | 15.300 | 25.561 |
| ATOM | 4911 | CD   | GLN | A | 299 | 32.246 | 16.582 | 24.472 |
| ATOM | 4912 | OE1  | GLN | A | 299 | 32.307 | 17.641 | 23.858 |
| ATOM | 4913 | NE2  | GLN | A | 299 | 33.073 | 15.620 | 24.142 |
| ATOM | 4914 | HE21 | GLN | A | 299 | 33.760 | 15.810 | 23.419 |
| ATOM | 4915 | HE22 | GLN | A | 299 | 32.999 | 14.706 | 24.562 |
| ATOM | 4916 | C    | GLN | A | 299 | 27.852 | 17.950 | 26.692 |
| ATOM | 4917 | O    | GLN | A | 299 | 27.857 | 18.947 | 27.415 |
| ATOM | 4918 | N    | ALA | A | 300 | 26.823 | 17.638 | 25.892 |
| ATOM | 4919 | H    | ALA | A | 300 | 26.925 | 16.827 | 25.287 |
| ATOM | 4920 | CA   | ALA | A | 300 | 25.551 | 18.356 | 25.831 |
| ATOM | 4921 | HA   | ALA | A | 300 | 25.752 | 19.425 | 25.771 |
| ATOM | 4922 | CB   | ALA | A | 300 | 24.832 | 17.919 | 24.546 |
| ATOM | 4923 | HB1  | ALA | A | 300 | 24.646 | 16.845 | 24.567 |
| ATOM | 4924 | HB2  | ALA | A | 300 | 23.876 | 18.437 | 24.470 |
| ATOM | 4925 | HB3  | ALA | A | 300 | 25.442 | 18.159 | 23.675 |
| ATOM | 4926 | C    | ALA | A | 300 | 24.654 | 18.137 | 27.066 |
| ATOM | 4927 | O    | ALA | A | 300 | 23.865 | 19.015 | 27.392 |
| ATOM | 4928 | N    | LEU | A | 301 | 24.774 | 17.004 | 27.768 |
| ATOM | 4929 | H    | LEU | A | 301 | 25.407 | 16.298 | 27.420 |
| ATOM | 4930 | CA   | LEU | A | 301 | 24.053 | 16.735 | 29.023 |
| ATOM | 4931 | HA   | LEU | A | 301 | 23.078 | 17.220 | 28.991 |
| ATOM | 4932 | CB   | LEU | A | 301 | 23.877 | 15.216 | 29.198 |
| ATOM | 4933 | HB2  | LEU | A | 301 | 24.829 | 14.726 | 28.981 |
| ATOM | 4934 | HB3  | LEU | A | 301 | 23.632 | 15.013 | 30.241 |
| ATOM | 4935 | CG   | LEU | A | 301 | 22.763 | 14.614 | 28.318 |
| ATOM | 4936 | HG   | LEU | A | 301 | 22.883 | 14.955 | 27.290 |
| ATOM | 4937 | CD1  | LEU | A | 301 | 22.875 | 13.085 | 28.340 |
| ATOM | 4938 | HD11 | LEU | A | 301 | 23.850 | 12.784 | 27.958 |
| ATOM | 4939 | HD12 | LEU | A | 301 | 22.761 | 12.715 | 29.359 |
| ATOM | 4940 | HD13 | LEU | A | 301 | 22.102 | 12.647 | 27.708 |
| ATOM | 4941 | CD2  | LEU | A | 301 | 21.367 | 15.026 | 28.817 |
| ATOM | 4942 | HD21 | LEU | A | 301 | 21.226 | 16.101 | 28.713 |
| ATOM | 4943 | HD22 | LEU | A | 301 | 20.600 | 14.522 | 28.231 |
| ATOM | 4944 | HD23 | LEU | A | 301 | 21.248 | 14.750 | 29.865 |
| ATOM | 4945 | C    | LEU | A | 301 | 24.770 | 17.350 | 30.229 |
| ATOM | 4946 | O    | LEU | A | 301 | 24.118 | 17.880 | 31.126 |
| ATOM | 4947 | N    | ALA | A | 302 | 26.106 | 17.327 | 30.234 |
| ATOM | 4948 | H    | ALA | A | 302 | 26.583 | 16.781 | 29.522 |
| ATOM | 4949 | CA   | ALA | A | 302 | 26.921 | 18.036 | 31.217 |
| ATOM | 4950 | HA   | ALA | A | 302 | 26.582 | 17.764 | 32.214 |
| ATOM | 4951 | CB   | ALA | A | 302 | 28.373 | 17.571 | 31.050 |
| ATOM | 4952 | HB1  | ALA | A | 302 | 28.743 | 17.818 | 30.054 |
| ATOM | 4953 | HB2  | ALA | A | 302 | 29.000 | 18.054 | 31.799 |

|      |      |     |     |   |     |        |        |        |
|------|------|-----|-----|---|-----|--------|--------|--------|
| ATOM | 4954 | HB3 | ALA | A | 302 | 28.440 | 16.492 | 31.189 |
| ATOM | 4955 | C   | ALA | A | 302 | 26.805 | 19.568 | 31.102 |
| ATOM | 4956 | O   | ALA | A | 302 | 27.133 | 20.272 | 32.057 |
| ATOM | 4957 | N   | HIE | A | 303 | 26.368 | 20.081 | 29.946 |
| ATOM | 4958 | H   | HIE | A | 303 | 26.098 | 19.428 | 29.225 |
| ATOM | 4959 | CA  | HIE | A | 303 | 26.224 | 21.507 | 29.629 |
| ATOM | 4960 | HA  | HIE | A | 303 | 27.223 | 21.940 | 29.619 |
| ATOM | 4961 | CB  | HIE | A | 303 | 25.650 | 21.619 | 28.206 |
| ATOM | 4962 | HB2 | HIE | A | 303 | 26.245 | 21.011 | 27.525 |
| ATOM | 4963 | HB3 | HIE | A | 303 | 24.628 | 21.240 | 28.211 |
| ATOM | 4964 | CG  | HIE | A | 303 | 25.616 | 23.021 | 27.670 |
| ATOM | 4965 | ND1 | HIE | A | 303 | 24.644 | 23.971 | 27.982 |
| ATOM | 4966 | CE1 | HIE | A | 303 | 25.030 | 25.100 | 27.370 |
| ATOM | 4967 | HE1 | HIE | A | 303 | 24.501 | 26.044 | 27.422 |
| ATOM | 4968 | NE2 | HIE | A | 303 | 26.172 | 24.899 | 26.694 |
| ATOM | 4969 | HE2 | HIE | A | 303 | 26.691 | 25.619 | 26.198 |
| ATOM | 4970 | CD2 | HIE | A | 303 | 26.564 | 23.593 | 26.876 |
| ATOM | 4971 | HD2 | HIE | A | 303 | 27.459 | 23.119 | 26.499 |
| ATOM | 4972 | C   | HIE | A | 303 | 25.335 | 22.279 | 30.641 |
| ATOM | 4973 | O   | HIE | A | 303 | 24.300 | 21.745 | 31.063 |
| ATOM | 4974 | N   | PRO | A | 304 | 25.678 | 23.542 | 30.985 |
| ATOM | 4975 | CD  | PRO | A | 304 | 26.913 | 24.227 | 30.611 |
| ATOM | 4976 | HD2 | PRO | A | 304 | 26.912 | 24.442 | 29.545 |
| ATOM | 4977 | HD3 | PRO | A | 304 | 27.789 | 23.633 | 30.872 |
| ATOM | 4978 | CG  | PRO | A | 304 | 26.931 | 25.545 | 31.381 |
| ATOM | 4979 | HG2 | PRO | A | 304 | 27.414 | 26.334 | 30.810 |
| ATOM | 4980 | HG3 | PRO | A | 304 | 27.427 | 25.413 | 32.342 |
| ATOM | 4981 | CB  | PRO | A | 304 | 25.450 | 25.820 | 31.607 |
| ATOM | 4982 | HB2 | PRO | A | 304 | 25.016 | 26.245 | 30.699 |
| ATOM | 4983 | HB3 | PRO | A | 304 | 25.288 | 26.479 | 32.457 |
| ATOM | 4984 | CA  | PRO | A | 304 | 24.898 | 24.414 | 31.861 |
| ATOM | 4985 | HA  | PRO | A | 304 | 25.116 | 24.137 | 32.890 |
| ATOM | 4986 | C   | PRO | A | 304 | 23.382 | 24.384 | 31.661 |
| ATOM | 4987 | O   | PRO | A | 304 | 22.644 | 24.380 | 32.639 |
| ATOM | 4988 | N   | TYR | A | 305 | 22.892 | 24.370 | 30.419 |
| ATOM | 4989 | H   | TYR | A | 305 | 23.538 | 24.364 | 29.635 |
| ATOM | 4990 | CA  | TYR | A | 305 | 21.458 | 24.440 | 30.106 |
| ATOM | 4991 | HA  | TYR | A | 305 | 21.037 | 25.283 | 30.653 |
| ATOM | 4992 | CB  | TYR | A | 305 | 21.332 | 24.713 | 28.598 |
| ATOM | 4993 | HB2 | TYR | A | 305 | 21.992 | 25.540 | 28.336 |
| ATOM | 4994 | HB3 | TYR | A | 305 | 21.680 | 23.831 | 28.055 |
| ATOM | 4995 | CG  | TYR | A | 305 | 19.941 | 25.080 | 28.119 |
| ATOM | 4996 | CD1 | TYR | A | 305 | 19.278 | 26.193 | 28.673 |
| ATOM | 4997 | HD1 | TYR | A | 305 | 19.750 | 26.780 | 29.445 |
| ATOM | 4998 | CE1 | TYR | A | 305 | 17.996 | 26.552 | 28.219 |
| ATOM | 4999 | HE1 | TYR | A | 305 | 17.490 | 27.402 | 28.651 |
| ATOM | 5000 | CZ  | TYR | A | 305 | 17.377 | 25.806 | 27.189 |
| ATOM | 5001 | OH  | TYR | A | 305 | 16.145 | 26.159 | 26.733 |
| ATOM | 5002 | HH  | TYR | A | 305 | 15.798 | 26.941 | 27.189 |
| ATOM | 5003 | CE2 | TYR | A | 305 | 18.049 | 24.700 | 26.622 |
| ATOM | 5004 | HE2 | TYR | A | 305 | 17.578 | 24.138 | 25.831 |
| ATOM | 5005 | CD2 | TYR | A | 305 | 19.326 | 24.337 | 27.092 |
| ATOM | 5006 | HD2 | TYR | A | 305 | 19.838 | 23.493 | 26.655 |
| ATOM | 5007 | C   | TYR | A | 305 | 20.648 | 23.192 | 30.522 |
| ATOM | 5008 | O   | TYR | A | 305 | 19.419 | 23.266 | 30.624 |
| ATOM | 5009 | N   | LEU | A | 306 | 21.316 | 22.055 | 30.761 |
| ATOM | 5010 | H   | LEU | A | 306 | 22.324 | 22.087 | 30.658 |

|      |      |      |     |   |     |        |        |        |
|------|------|------|-----|---|-----|--------|--------|--------|
| ATOM | 5011 | CA   | LEU | A | 306 | 20.694 | 20.751 | 31.042 |
| ATOM | 5012 | HA   | LEU | A | 306 | 19.634 | 20.886 | 31.245 |
| ATOM | 5013 | CB   | LEU | A | 306 | 20.866 | 19.874 | 29.791 |
| ATOM | 5014 | HB2  | LEU | A | 306 | 21.926 | 19.855 | 29.528 |
| ATOM | 5015 | HB3  | LEU | A | 306 | 20.572 | 18.851 | 30.031 |
| ATOM | 5016 | CG   | LEU | A | 306 | 20.045 | 20.351 | 28.573 |
| ATOM | 5017 | HG   | LEU | A | 306 | 20.252 | 21.401 | 28.369 |
| ATOM | 5018 | CD1  | LEU | A | 306 | 20.478 | 19.546 | 27.348 |
| ATOM | 5019 | HD11 | LEU | A | 306 | 20.406 | 18.482 | 27.565 |
| ATOM | 5020 | HD12 | LEU | A | 306 | 19.852 | 19.791 | 26.495 |
| ATOM | 5021 | HD13 | LEU | A | 306 | 21.505 | 19.798 | 27.092 |
| ATOM | 5022 | CD2  | LEU | A | 306 | 18.533 | 20.180 | 28.794 |
| ATOM | 5023 | HD21 | LEU | A | 306 | 17.993 | 20.474 | 27.895 |
| ATOM | 5024 | HD22 | LEU | A | 306 | 18.306 | 19.139 | 29.019 |
| ATOM | 5025 | HD23 | LEU | A | 306 | 18.193 | 20.811 | 29.613 |
| ATOM | 5026 | C    | LEU | A | 306 | 21.243 | 20.042 | 32.292 |
| ATOM | 5027 | O    | LEU | A | 306 | 20.646 | 19.064 | 32.750 |
| ATOM | 5028 | N    | GLU | A | 307 | 22.321 | 20.558 | 32.885 |
| ATOM | 5029 | H    | GLU | A | 307 | 22.797 | 21.308 | 32.399 |
| ATOM | 5030 | CA   | GLU | A | 307 | 22.985 | 20.009 | 34.070 |
| ATOM | 5031 | HA   | GLU | A | 307 | 23.363 | 19.025 | 33.793 |
| ATOM | 5032 | CB   | GLU | A | 307 | 24.193 | 20.891 | 34.415 |
| ATOM | 5033 | HB2  | GLU | A | 307 | 24.797 | 20.371 | 35.152 |
| ATOM | 5034 | HB3  | GLU | A | 307 | 24.804 | 20.994 | 33.518 |
| ATOM | 5035 | CG   | GLU | A | 307 | 23.857 | 22.303 | 34.933 |
| ATOM | 5036 | HG2  | GLU | A | 307 | 24.675 | 22.962 | 34.654 |
| ATOM | 5037 | HG3  | GLU | A | 307 | 22.946 | 22.667 | 34.462 |
| ATOM | 5038 | CD   | GLU | A | 307 | 23.713 | 22.406 | 36.448 |
| ATOM | 5039 | OE1  | GLU | A | 307 | 22.843 | 23.164 | 36.941 |
| ATOM | 5040 | OE2  | GLU | A | 307 | 24.517 | 21.800 | 37.184 |
| ATOM | 5041 | C    | GLU | A | 307 | 22.078 | 19.827 | 35.302 |
| ATOM | 5042 | O    | GLU | A | 307 | 22.420 | 19.058 | 36.203 |
| ATOM | 5043 | N    | GLN | A | 308 | 20.932 | 20.512 | 35.349 |
| ATOM | 5044 | H    | GLN | A | 308 | 20.742 | 21.164 | 34.594 |
| ATOM | 5045 | CA   | GLN | A | 308 | 19.922 | 20.387 | 36.400 |
| ATOM | 5046 | HA   | GLN | A | 308 | 20.446 | 20.421 | 37.355 |
| ATOM | 5047 | CB   | GLN | A | 308 | 18.957 | 21.591 | 36.356 |
| ATOM | 5048 | HB2  | GLN | A | 308 | 18.363 | 21.559 | 37.266 |
| ATOM | 5049 | HB3  | GLN | A | 308 | 19.535 | 22.514 | 36.393 |
| ATOM | 5050 | CG   | GLN | A | 308 | 17.961 | 21.671 | 35.179 |
| ATOM | 5051 | HG2  | GLN | A | 308 | 17.475 | 20.708 | 35.031 |
| ATOM | 5052 | HG3  | GLN | A | 308 | 17.179 | 22.382 | 35.450 |
| ATOM | 5053 | CD   | GLN | A | 308 | 18.555 | 22.139 | 33.852 |
| ATOM | 5054 | OE1  | GLN | A | 308 | 19.731 | 22.456 | 33.724 |
| ATOM | 5055 | NE2  | GLN | A | 308 | 17.762 | 22.216 | 32.808 |
| ATOM | 5056 | HE21 | GLN | A | 308 | 18.175 | 22.539 | 31.941 |
| ATOM | 5057 | HE22 | GLN | A | 308 | 16.767 | 22.052 | 32.912 |
| ATOM | 5058 | C    | GLN | A | 308 | 19.166 | 19.046 | 36.374 |
| ATOM | 5059 | O    | GLN | A | 308 | 18.610 | 18.632 | 37.394 |
| ATOM | 5060 | N    | TYR | A | 309 | 19.157 | 18.334 | 35.243 |
| ATOM | 5061 | H    | TYR | A | 309 | 19.613 | 18.725 | 34.422 |
| ATOM | 5062 | CA   | TYR | A | 309 | 18.695 | 16.942 | 35.166 |
| ATOM | 5063 | HA   | TYR | A | 309 | 17.948 | 16.747 | 35.935 |
| ATOM | 5064 | CB   | TYR | A | 309 | 18.079 | 16.666 | 33.792 |
| ATOM | 5065 | HB2  | TYR | A | 309 | 18.829 | 16.819 | 33.016 |
| ATOM | 5066 | HB3  | TYR | A | 309 | 17.783 | 15.618 | 33.761 |
| ATOM | 5067 | CG   | TYR | A | 309 | 16.863 | 17.490 | 33.473 |

|      |      |     |     |   |     |        |        |        |
|------|------|-----|-----|---|-----|--------|--------|--------|
| ATOM | 5068 | CD1 | TYR | A | 309 | 15.680 | 17.287 | 34.203 |
| ATOM | 5069 | HD1 | TYR | A | 309 | 15.650 | 16.547 | 34.988 |
| ATOM | 5070 | CE1 | TYR | A | 309 | 14.540 | 18.051 | 33.914 |
| ATOM | 5071 | HE1 | TYR | A | 309 | 13.638 | 17.893 | 34.477 |
| ATOM | 5072 | CZ  | TYR | A | 309 | 14.581 | 19.018 | 32.888 |
| ATOM | 5073 | OH  | TYR | A | 309 | 13.500 | 19.804 | 32.643 |
| ATOM | 5074 | HH  | TYR | A | 309 | 12.748 | 19.604 | 33.212 |
| ATOM | 5075 | CE2 | TYR | A | 309 | 15.760 | 19.189 | 32.133 |
| ATOM | 5076 | HE2 | TYR | A | 309 | 15.782 | 19.886 | 31.317 |
| ATOM | 5077 | CD2 | TYR | A | 309 | 16.905 | 18.434 | 32.432 |
| ATOM | 5078 | HD2 | TYR | A | 309 | 17.811 | 18.572 | 31.858 |
| ATOM | 5079 | C   | TYR | A | 309 | 19.841 | 15.952 | 35.354 |
| ATOM | 5080 | O   | TYR | A | 309 | 19.736 | 14.996 | 36.124 |
| ATOM | 5081 | N   | TYR | A | 310 | 20.939 | 16.181 | 34.638 |
| ATOM | 5082 | H   | TYR | A | 310 | 20.966 | 17.028 | 34.083 |
| ATOM | 5083 | CA  | TYR | A | 310 | 21.980 | 15.193 | 34.384 |
| ATOM | 5084 | HA  | TYR | A | 310 | 21.536 | 14.376 | 33.817 |
| ATOM | 5085 | CB  | TYR | A | 310 | 23.034 | 15.858 | 33.497 |
| ATOM | 5086 | HB2 | TYR | A | 310 | 22.559 | 16.153 | 32.561 |
| ATOM | 5087 | HB3 | TYR | A | 310 | 23.374 | 16.765 | 33.998 |
| ATOM | 5088 | CG  | TYR | A | 310 | 24.246 | 15.008 | 33.157 |
| ATOM | 5089 | CD1 | TYR | A | 310 | 24.097 | 13.733 | 32.581 |
| ATOM | 5090 | HD1 | TYR | A | 310 | 23.108 | 13.338 | 32.408 |
| ATOM | 5091 | CE1 | TYR | A | 310 | 25.233 | 12.988 | 32.206 |
| ATOM | 5092 | HE1 | TYR | A | 310 | 25.115 | 12.016 | 31.747 |
| ATOM | 5093 | CZ  | TYR | A | 310 | 26.528 | 13.520 | 32.421 |
| ATOM | 5094 | OH  | TYR | A | 310 | 27.644 | 12.836 | 32.051 |
| ATOM | 5095 | HH  | TYR | A | 310 | 27.422 | 12.044 | 31.538 |
| ATOM | 5096 | CE2 | TYR | A | 310 | 26.671 | 14.787 | 33.021 |
| ATOM | 5097 | HE2 | TYR | A | 310 | 27.658 | 15.196 | 33.180 |
| ATOM | 5098 | CD2 | TYR | A | 310 | 25.531 | 15.523 | 33.386 |
| ATOM | 5099 | HD2 | TYR | A | 310 | 25.641 | 16.502 | 33.819 |
| ATOM | 5100 | C   | TYR | A | 310 | 22.605 | 14.598 | 35.656 |
| ATOM | 5101 | O   | TYR | A | 310 | 22.843 | 15.301 | 36.643 |
| ATOM | 5102 | N   | ASP | A | 311 | 22.899 | 13.303 | 35.626 |
| ATOM | 5103 | H   | ASP | A | 311 | 22.489 | 12.743 | 34.876 |
| ATOM | 5104 | CA  | ASP | A | 311 | 23.869 | 12.641 | 36.499 |
| ATOM | 5105 | HA  | ASP | A | 311 | 24.601 | 13.371 | 36.831 |
| ATOM | 5106 | CB  | ASP | A | 311 | 23.161 | 12.093 | 37.748 |
| ATOM | 5107 | HB2 | ASP | A | 311 | 22.515 | 12.875 | 38.150 |
| ATOM | 5108 | HB3 | ASP | A | 311 | 22.530 | 11.248 | 37.477 |
| ATOM | 5109 | CG  | ASP | A | 311 | 24.133 | 11.660 | 38.848 |
| ATOM | 5110 | OD1 | ASP | A | 311 | 23.913 | 12.065 | 40.015 |
| ATOM | 5111 | OD2 | ASP | A | 311 | 25.113 | 10.937 | 38.564 |
| ATOM | 5112 | C   | ASP | A | 311 | 24.564 | 11.527 | 35.695 |
| ATOM | 5113 | O   | ASP | A | 311 | 23.859 | 10.641 | 35.199 |
| ATOM | 5114 | N   | PRO | A | 312 | 25.910 | 11.530 | 35.560 |
| ATOM | 5115 | CD  | PRO | A | 312 | 26.841 | 12.510 | 36.103 |
| ATOM | 5116 | HD2 | PRO | A | 312 | 26.932 | 12.357 | 37.178 |
| ATOM | 5117 | HD3 | PRO | A | 312 | 26.523 | 13.530 | 35.886 |
| ATOM | 5118 | CG  | PRO | A | 312 | 28.189 | 12.247 | 35.439 |
| ATOM | 5119 | HG2 | PRO | A | 312 | 29.015 | 12.427 | 36.126 |
| ATOM | 5120 | HG3 | PRO | A | 312 | 28.300 | 12.887 | 34.569 |
| ATOM | 5121 | CB  | PRO | A | 312 | 28.124 | 10.785 | 35.003 |
| ATOM | 5122 | HB2 | PRO | A | 312 | 28.556 | 10.156 | 35.782 |
| ATOM | 5123 | HB3 | PRO | A | 312 | 28.658 | 10.631 | 34.065 |
| ATOM | 5124 | CA  | PRO | A | 312 | 26.630 | 10.480 | 34.843 |

|      |      |     |     |   |     |        |        |        |
|------|------|-----|-----|---|-----|--------|--------|--------|
| ATOM | 5125 | HA  | PRO | A | 312 | 26.365 | 10.535 | 33.787 |
| ATOM | 5126 | C   | PRO | A | 312 | 26.316 | 9.073  | 35.369 |
| ATOM | 5127 | O   | PRO | A | 312 | 26.442 | 8.106  | 34.625 |
| ATOM | 5128 | N   | SER | A | 313 | 25.893 | 8.943  | 36.629 |
| ATOM | 5129 | H   | SER | A | 313 | 25.775 | 9.778  | 37.206 |
| ATOM | 5130 | CA  | SER | A | 313 | 25.636 | 7.660  | 37.290 |
| ATOM | 5131 | HA  | SER | A | 313 | 26.248 | 6.886  | 36.823 |
| ATOM | 5132 | CB  | SER | A | 313 | 26.052 | 7.796  | 38.761 |
| ATOM | 5133 | HB2 | SER | A | 313 | 25.376 | 8.498  | 39.253 |
| ATOM | 5134 | HB3 | SER | A | 313 | 25.959 | 6.835  | 39.260 |
| ATOM | 5135 | OG  | SER | A | 313 | 27.390 | 8.253  | 38.899 |
| ATOM | 5136 | HG  | SER | A | 313 | 27.386 | 8.859  | 39.667 |
| ATOM | 5137 | C   | SER | A | 313 | 24.171 | 7.182  | 37.235 |
| ATOM | 5138 | O   | SER | A | 313 | 23.914 | 6.046  | 37.642 |
| ATOM | 5139 | N   | ASP | A | 314 | 23.234 | 8.028  | 36.771 |
| ATOM | 5140 | H   | ASP | A | 314 | 23.554 | 8.946  | 36.492 |
| ATOM | 5141 | CA  | ASP | A | 314 | 21.779 | 7.759  | 36.697 |
| ATOM | 5142 | HA  | ASP | A | 314 | 21.616 | 6.720  | 36.969 |
| ATOM | 5143 | CB  | ASP | A | 314 | 21.063 | 8.643  | 37.741 |
| ATOM | 5144 | HB2 | ASP | A | 314 | 21.706 | 8.755  | 38.616 |
| ATOM | 5145 | HB3 | ASP | A | 314 | 20.904 | 9.637  | 37.321 |
| ATOM | 5146 | CG  | ASP | A | 314 | 19.726 | 8.082  | 38.245 |
| ATOM | 5147 | OD1 | ASP | A | 314 | 18.749 | 8.863  | 38.354 |
| ATOM | 5148 | OD2 | ASP | A | 314 | 19.650 | 6.892  | 38.631 |
| ATOM | 5149 | C   | ASP | A | 314 | 21.180 | 7.940  | 35.277 |
| ATOM | 5150 | O   | ASP | A | 314 | 20.057 | 7.506  | 35.006 |
| ATOM | 5151 | N   | GLU | A | 315 | 21.939 | 8.527  | 34.347 |
| ATOM | 5152 | H   | GLU | A | 315 | 22.820 | 8.926  | 34.648 |
| ATOM | 5153 | CA  | GLU | A | 315 | 21.680 | 8.481  | 32.906 |
| ATOM | 5154 | HA  | GLU | A | 315 | 20.605 | 8.535  | 32.742 |
| ATOM | 5155 | CB  | GLU | A | 315 | 22.332 | 9.698  | 32.222 |
| ATOM | 5156 | HB2 | GLU | A | 315 | 23.146 | 10.086 | 32.830 |
| ATOM | 5157 | HB3 | GLU | A | 315 | 22.776 | 9.394  | 31.274 |
| ATOM | 5158 | CG  | GLU | A | 315 | 21.331 | 10.819 | 31.920 |
| ATOM | 5159 | HG2 | GLU | A | 315 | 21.871 | 11.685 | 31.544 |
| ATOM | 5160 | HG3 | GLU | A | 315 | 20.673 | 10.480 | 31.121 |
| ATOM | 5161 | CD  | GLU | A | 315 | 20.473 | 11.237 | 33.115 |
| ATOM | 5162 | OE1 | GLU | A | 315 | 20.894 | 12.085 | 33.927 |
| ATOM | 5163 | OE2 | GLU | A | 315 | 19.311 | 10.779 | 33.191 |
| ATOM | 5164 | C   | GLU | A | 315 | 22.181 | 7.150  | 32.306 |
| ATOM | 5165 | O   | GLU | A | 315 | 23.143 | 6.564  | 32.816 |
| ATOM | 5166 | N   | PRO | A | 316 | 21.572 | 6.670  | 31.205 |
| ATOM | 5167 | CD  | PRO | A | 316 | 20.560 | 7.354  | 30.411 |
| ATOM | 5168 | HD2 | PRO | A | 316 | 20.944 | 8.277  | 29.968 |
| ATOM | 5169 | HD3 | PRO | A | 316 | 19.705 | 7.554  | 31.046 |
| ATOM | 5170 | CG  | PRO | A | 316 | 20.132 | 6.379  | 29.314 |
| ATOM | 5171 | HG2 | PRO | A | 316 | 20.753 | 6.519  | 28.426 |
| ATOM | 5172 | HG3 | PRO | A | 316 | 19.073 | 6.487  | 29.074 |
| ATOM | 5173 | CB  | PRO | A | 316 | 20.438 | 5.024  | 29.953 |
| ATOM | 5174 | HB2 | PRO | A | 316 | 20.560 | 4.233  | 29.211 |
| ATOM | 5175 | HB3 | PRO | A | 316 | 19.647 | 4.762  | 30.653 |
| ATOM | 5176 | CA  | PRO | A | 316 | 21.725 | 5.300  | 30.732 |
| ATOM | 5177 | HA  | PRO | A | 316 | 21.797 | 4.623  | 31.584 |
| ATOM | 5178 | C   | PRO | A | 316 | 22.937 | 5.100  | 29.815 |
| ATOM | 5179 | O   | PRO | A | 316 | 23.417 | 6.037  | 29.183 |
| ATOM | 5180 | N   | ILE | A | 317 | 23.369 | 3.844  | 29.678 |
| ATOM | 5181 | H   | ILE | A | 317 | 22.899 | 3.122  | 30.216 |

|      |      |      |     |   |     |        |        |        |
|------|------|------|-----|---|-----|--------|--------|--------|
| ATOM | 5182 | CA   | ILE | A | 317 | 24.324 | 3.357  | 28.665 |
| ATOM | 5183 | HA   | ILE | A | 317 | 24.485 | 4.127  | 27.905 |
| ATOM | 5184 | CB   | ILE | A | 317 | 25.695 | 3.001  | 29.311 |
| ATOM | 5185 | HB   | ILE | A | 317 | 25.558 | 2.149  | 29.981 |
| ATOM | 5186 | CG2  | ILE | A | 317 | 26.715 | 2.578  | 28.236 |
| ATOM | 5187 | HG21 | ILE | A | 317 | 27.696 | 2.415  | 28.684 |
| ATOM | 5188 | HG22 | ILE | A | 317 | 26.419 | 1.642  | 27.767 |
| ATOM | 5189 | HG23 | ILE | A | 317 | 26.797 | 3.354  | 27.477 |
| ATOM | 5190 | CG1  | ILE | A | 317 | 26.312 | 4.172  | 30.115 |
| ATOM | 5191 | HG12 | ILE | A | 317 | 27.399 | 4.144  | 30.049 |
| ATOM | 5192 | HG13 | ILE | A | 317 | 25.987 | 5.121  | 29.694 |
| ATOM | 5193 | CD1  | ILE | A | 317 | 25.968 | 4.122  | 31.607 |
| ATOM | 5194 | HD11 | ILE | A | 317 | 26.443 | 4.956  | 32.119 |
| ATOM | 5195 | HD12 | ILE | A | 317 | 24.894 | 4.185  | 31.769 |
| ATOM | 5196 | HD13 | ILE | A | 317 | 26.349 | 3.193  | 32.030 |
| ATOM | 5197 | C    | ILE | A | 317 | 23.687 | 2.123  | 27.998 |
| ATOM | 5198 | O    | ILE | A | 317 | 22.890 | 1.432  | 28.637 |
| ATOM | 5199 | N    | ALA | A | 318 | 24.018 | 1.804  | 26.745 |
| ATOM | 5200 | H    | ALA | A | 318 | 24.640 | 2.419  | 26.231 |
| ATOM | 5201 | CA   | ALA | A | 318 | 23.605 | 0.555  | 26.096 |
| ATOM | 5202 | HA   | ALA | A | 318 | 22.521 | 0.557  | 25.988 |
| ATOM | 5203 | CB   | ALA | A | 318 | 24.237 | 0.513  | 24.709 |
| ATOM | 5204 | HB1  | ALA | A | 318 | 23.952 | -0.400 | 24.185 |
| ATOM | 5205 | HB2  | ALA | A | 318 | 23.897 | 1.373  | 24.142 |
| ATOM | 5206 | HB3  | ALA | A | 318 | 25.324 | 0.552  | 24.795 |
| ATOM | 5207 | C    | ALA | A | 318 | 24.013 | -0.694 | 26.895 |
| ATOM | 5208 | O    | ALA | A | 318 | 25.153 | -0.792 | 27.344 |
| ATOM | 5209 | N    | GLU | A | 319 | 23.121 | -1.681 | 27.018 |
| ATOM | 5210 | H    | GLU | A | 319 | 22.195 | -1.543 | 26.646 |
| ATOM | 5211 | CA   | GLU | A | 319 | 23.368 | -2.847 | 27.876 |
| ATOM | 5212 | HA   | GLU | A | 319 | 23.831 | -2.478 | 28.792 |
| ATOM | 5213 | CB   | GLU | A | 319 | 22.046 | -3.499 | 28.284 |
| ATOM | 5214 | HB2  | GLU | A | 319 | 22.268 | -4.194 | 29.087 |
| ATOM | 5215 | HB3  | GLU | A | 319 | 21.400 | -2.718 | 28.681 |
| ATOM | 5216 | CG   | GLU | A | 319 | 21.276 | -4.272 | 27.205 |
| ATOM | 5217 | HG2  | GLU | A | 319 | 20.877 | -3.580 | 26.464 |
| ATOM | 5218 | HG3  | GLU | A | 319 | 21.930 | -4.987 | 26.705 |
| ATOM | 5219 | CD   | GLU | A | 319 | 20.132 | -5.033 | 27.867 |
| ATOM | 5220 | OE1  | GLU | A | 319 | 19.166 | -4.386 | 28.329 |
| ATOM | 5221 | OE2  | GLU | A | 319 | 20.217 | -6.268 | 28.029 |
| ATOM | 5222 | C    | GLU | A | 319 | 24.331 | -3.891 | 27.290 |
| ATOM | 5223 | O    | GLU | A | 319 | 24.963 | -4.632 | 28.046 |
| ATOM | 5224 | N    | ALA | A | 320 | 24.455 | -3.957 | 25.964 |
| ATOM | 5225 | H    | ALA | A | 320 | 23.902 | -3.325 | 25.405 |
| ATOM | 5226 | CA   | ALA | A | 320 | 25.348 | -4.853 | 25.228 |
| ATOM | 5227 | HA   | ALA | A | 320 | 26.332 | -4.820 | 25.699 |
| ATOM | 5228 | CB   | ALA | A | 320 | 24.808 | -6.293 | 25.296 |
| ATOM | 5229 | HB1  | ALA | A | 320 | 24.644 | -6.593 | 26.329 |
| ATOM | 5230 | HB2  | ALA | A | 320 | 23.858 | -6.365 | 24.764 |
| ATOM | 5231 | HB3  | ALA | A | 320 | 25.520 | -6.979 | 24.834 |
| ATOM | 5232 | C    | ALA | A | 320 | 25.468 | -4.391 | 23.760 |
| ATOM | 5233 | O    | ALA | A | 320 | 24.453 | -3.941 | 23.211 |
| ATOM | 5234 | N    | PRO | A | 321 | 26.646 | -4.523 | 23.120 |
| ATOM | 5235 | CD   | PRO | A | 321 | 27.912 | -4.960 | 23.699 |
| ATOM | 5236 | HD2  | PRO | A | 321 | 27.824 | -5.941 | 24.170 |
| ATOM | 5237 | HD3  | PRO | A | 321 | 28.249 | -4.214 | 24.420 |
| ATOM | 5238 | CG   | PRO | A | 321 | 28.910 | -5.021 | 22.541 |

|      |      |     |     |   |     |        |         |        |
|------|------|-----|-----|---|-----|--------|---------|--------|
| ATOM | 5239 | HG2 | PRO | A | 321 | 28.916 | -6.020  | 22.110 |
| ATOM | 5240 | HG3 | PRO | A | 321 | 29.916 | -4.737  | 22.846 |
| ATOM | 5241 | CB  | PRO | A | 321 | 28.337 | -4.037  | 21.525 |
| ATOM | 5242 | HB2 | PRO | A | 321 | 28.648 | -4.272  | 20.506 |
| ATOM | 5243 | HB3 | PRO | A | 321 | 28.640 | -3.023  | 21.782 |
| ATOM | 5244 | CA  | PRO | A | 321 | 26.826 | -4.177  | 21.717 |
| ATOM | 5245 | HA  | PRO | A | 321 | 26.343 | -3.222  | 21.508 |
| ATOM | 5246 | C   | PRO | A | 321 | 26.251 | -5.244  | 20.780 |
| ATOM | 5247 | O   | PRO | A | 321 | 26.063 | -6.405  | 21.150 |
| ATOM | 5248 | N   | PHE | A | 322 | 26.038 | -4.841  | 19.527 |
| ATOM | 5249 | H   | PHE | A | 322 | 26.240 | -3.870  | 19.313 |
| ATOM | 5250 | CA  | PHE | A | 322 | 25.723 | -5.728  | 18.411 |
| ATOM | 5251 | HA  | PHE | A | 322 | 24.997 | -6.469  | 18.742 |
| ATOM | 5252 | CB  | PHE | A | 322 | 25.101 | -4.920  | 17.264 |
| ATOM | 5253 | HB2 | PHE | A | 322 | 25.780 | -4.115  | 16.986 |
| ATOM | 5254 | HB3 | PHE | A | 322 | 25.020 | -5.573  | 16.398 |
| ATOM | 5255 | CG  | PHE | A | 322 | 23.726 | -4.340  | 17.533 |
| ATOM | 5256 | CD1 | PHE | A | 322 | 23.589 | -3.000  | 17.940 |
| ATOM | 5257 | HD1 | PHE | A | 322 | 24.464 | -2.389  | 18.097 |
| ATOM | 5258 | CE1 | PHE | A | 322 | 22.311 | -2.445  | 18.125 |
| ATOM | 5259 | HE1 | PHE | A | 322 | 22.217 | -1.411  | 18.422 |
| ATOM | 5260 | CZ  | PHE | A | 322 | 21.162 | -3.225  | 17.902 |
| ATOM | 5261 | HZ  | PHE | A | 322 | 20.180 | -2.792  | 18.034 |
| ATOM | 5262 | CE2 | PHE | A | 322 | 21.297 | -4.561  | 17.485 |
| ATOM | 5263 | HE2 | PHE | A | 322 | 20.419 | -5.158  | 17.283 |
| ATOM | 5264 | CD2 | PHE | A | 322 | 22.575 | -5.121  | 17.309 |
| ATOM | 5265 | HD2 | PHE | A | 322 | 22.665 | -6.144  | 16.972 |
| ATOM | 5266 | C   | PHE | A | 322 | 26.969 | -6.475  | 17.910 |
| ATOM | 5267 | O   | PHE | A | 322 | 28.088 | -5.949  | 17.924 |
| ATOM | 5268 | N   | LYS | A | 323 | 26.748 | -7.695  | 17.410 |
| ATOM | 5269 | H   | LYS | A | 323 | 25.800 | -8.042  | 17.410 |
| ATOM | 5270 | CA  | LYS | A | 323 | 27.760 | -8.533  | 16.757 |
| ATOM | 5271 | HA  | LYS | A | 323 | 28.728 | -8.317  | 17.202 |
| ATOM | 5272 | CB  | LYS | A | 323 | 27.440 | -10.017 | 17.032 |
| ATOM | 5273 | HB2 | LYS | A | 323 | 26.478 | -10.256 | 16.579 |
| ATOM | 5274 | HB3 | LYS | A | 323 | 28.204 | -10.639 | 16.563 |
| ATOM | 5275 | CG  | LYS | A | 323 | 27.379 | -10.374 | 18.529 |
| ATOM | 5276 | HG2 | LYS | A | 323 | 28.338 | -10.144 | 18.998 |
| ATOM | 5277 | HG3 | LYS | A | 323 | 26.590 | -9.796  | 19.014 |
| ATOM | 5278 | CD  | LYS | A | 323 | 27.075 | -11.871 | 18.693 |
| ATOM | 5279 | HD2 | LYS | A | 323 | 26.144 | -12.114 | 18.180 |
| ATOM | 5280 | HD3 | LYS | A | 323 | 27.872 | -12.440 | 18.215 |
| ATOM | 5281 | CE  | LYS | A | 323 | 26.978 | -12.313 | 20.159 |
| ATOM | 5282 | HE2 | LYS | A | 323 | 26.938 | -13.405 | 20.186 |
| ATOM | 5283 | HE3 | LYS | A | 323 | 27.883 | -11.998 | 20.687 |
| ATOM | 5284 | NZ  | LYS | A | 323 | 25.780 | -11.761 | 20.836 |
| ATOM | 5285 | HZ1 | LYS | A | 323 | 25.685 | -12.141 | 21.770 |
| ATOM | 5286 | HZ2 | LYS | A | 323 | 25.841 | -10.750 | 20.942 |
| ATOM | 5287 | HZ3 | LYS | A | 323 | 24.918 | -11.945 | 20.334 |
| ATOM | 5288 | C   | LYS | A | 323 | 27.883 | -8.225  | 15.246 |
| ATOM | 5289 | O   | LYS | A | 323 | 27.174 | -7.362  | 14.710 |
| ATOM | 5290 | N   | PHE | A | 324 | 28.793 | -8.924  | 14.550 |
| ATOM | 5291 | H   | PHE | A | 324 | 29.342 | -9.605  | 15.051 |
| ATOM | 5292 | CA  | PHE | A | 324 | 29.116 | -8.736  | 13.123 |
| ATOM | 5293 | HA  | PHE | A | 324 | 29.582 | -7.759  | 13.013 |
| ATOM | 5294 | CB  | PHE | A | 324 | 30.140 | -9.807  | 12.701 |
| ATOM | 5295 | HB2 | PHE | A | 324 | 30.546 | -9.516  | 11.729 |

|      |      |     |     |   |     |        |         |        |
|------|------|-----|-----|---|-----|--------|---------|--------|
| ATOM | 5296 | HB3 | PHE | A | 324 | 30.972 | -9.801  | 13.405 |
| ATOM | 5297 | CG  | PHE | A | 324 | 29.587 | -11.225 | 12.589 |
| ATOM | 5298 | CD1 | PHE | A | 324 | 29.254 | -11.755 | 11.326 |
| ATOM | 5299 | HD1 | PHE | A | 324 | 29.402 | -11.164 | 10.433 |
| ATOM | 5300 | CE1 | PHE | A | 324 | 28.739 | -13.060 | 11.215 |
| ATOM | 5301 | HE1 | PHE | A | 324 | 28.484 | -13.460 | 10.244 |
| ATOM | 5302 | CZ  | PHE | A | 324 | 28.554 | -13.845 | 12.366 |
| ATOM | 5303 | HZ  | PHE | A | 324 | 28.163 | -14.849 | 12.282 |
| ATOM | 5304 | CE2 | PHE | A | 324 | 28.871 | -13.319 | 13.630 |
| ATOM | 5305 | HE2 | PHE | A | 324 | 28.723 | -13.920 | 14.517 |
| ATOM | 5306 | CD2 | PHE | A | 324 | 29.381 | -12.013 | 13.740 |
| ATOM | 5307 | HD2 | PHE | A | 324 | 29.618 | -11.626 | 14.717 |
| ATOM | 5308 | C   | PHE | A | 324 | 27.903 | -8.776  | 12.174 |
| ATOM | 5309 | O   | PHE | A | 324 | 27.866 | -8.064  | 11.170 |
| ATOM | 5310 | N   | ASP | A | 325 | 26.902 | -9.591  | 12.507 |
| ATOM | 5311 | H   | ASP | A | 325 | 26.959 | -10.091 | 13.385 |
| ATOM | 5312 | CA  | ASP | A | 325 | 25.711 | -9.851  | 11.703 |
| ATOM | 5313 | HA  | ASP | A | 325 | 26.033 | -10.158 | 10.709 |
| ATOM | 5314 | CB  | ASP | A | 325 | 24.939 | -11.025 | 12.325 |
| ATOM | 5315 | HB2 | ASP | A | 325 | 24.183 | -11.360 | 11.612 |
| ATOM | 5316 | HB3 | ASP | A | 325 | 25.617 | -11.863 | 12.500 |
| ATOM | 5317 | CG  | ASP | A | 325 | 24.253 | -10.638 | 13.637 |
| ATOM | 5318 | OD1 | ASP | A | 325 | 22.999 | -10.681 | 13.672 |
| ATOM | 5319 | OD2 | ASP | A | 325 | 24.970 | -10.243 | 14.578 |
| ATOM | 5320 | C   | ASP | A | 325 | 24.805 | -8.619  | 11.555 |
| ATOM | 5321 | O   | ASP | A | 325 | 24.055 | -8.537  | 10.591 |
| ATOM | 5322 | N   | MET | A | 326 | 24.873 | -7.647  | 12.471 |
| ATOM | 5323 | H   | MET | A | 326 | 25.461 | -7.806  | 13.285 |
| ATOM | 5324 | CA  | MET | A | 326 | 24.093 | -6.404  | 12.372 |
| ATOM | 5325 | HA  | MET | A | 326 | 23.069 | -6.672  | 12.112 |
| ATOM | 5326 | CB  | MET | A | 326 | 24.076 | -5.731  | 13.750 |
| ATOM | 5327 | HB2 | MET | A | 326 | 23.788 | -6.473  | 14.498 |
| ATOM | 5328 | HB3 | MET | A | 326 | 25.083 | -5.385  | 13.986 |
| ATOM | 5329 | CG  | MET | A | 326 | 23.100 | -4.551  | 13.853 |
| ATOM | 5330 | HG2 | MET | A | 326 | 23.286 | -4.056  | 14.805 |
| ATOM | 5331 | HG3 | MET | A | 326 | 23.310 | -3.820  | 13.074 |
| ATOM | 5332 | SD  | MET | A | 326 | 21.337 | -4.980  | 13.822 |
| ATOM | 5333 | CE  | MET | A | 326 | 20.936 | -4.681  | 12.082 |
| ATOM | 5334 | HE1 | MET | A | 326 | 21.266 | -3.687  | 11.785 |
| ATOM | 5335 | HE2 | MET | A | 326 | 21.419 | -5.421  | 11.447 |
| ATOM | 5336 | HE3 | MET | A | 326 | 19.859 | -4.750  | 11.936 |
| ATOM | 5337 | C   | MET | A | 326 | 24.615 | -5.464  | 11.264 |
| ATOM | 5338 | O   | MET | A | 326 | 23.860 | -4.652  | 10.728 |
| ATOM | 5339 | N   | GLU | A | 327 | 25.886 | -5.597  | 10.874 |
| ATOM | 5340 | H   | GLU | A | 327 | 26.438 | -6.313  | 11.329 |
| ATOM | 5341 | CA  | GLU | A | 327 | 26.495 | -4.890  | 9.737  |
| ATOM | 5342 | HA  | GLU | A | 327 | 25.929 | -3.979  | 9.540  |
| ATOM | 5343 | CB  | GLU | A | 327 | 27.927 | -4.479  | 10.134 |
| ATOM | 5344 | HB2 | GLU | A | 327 | 27.933 | -4.182  | 11.182 |
| ATOM | 5345 | HB3 | GLU | A | 327 | 28.589 | -5.336  | 10.017 |
| ATOM | 5346 | CG  | GLU | A | 327 | 28.482 | -3.290  | 9.342  |
| ATOM | 5347 | HG2 | GLU | A | 327 | 28.442 | -3.495  | 8.277  |
| ATOM | 5348 | HG3 | GLU | A | 327 | 27.873 | -2.409  | 9.541  |
| ATOM | 5349 | CD  | GLU | A | 327 | 29.932 | -3.003  | 9.723  |
| ATOM | 5350 | OE1 | GLU | A | 327 | 30.847 | -3.718  | 9.249  |
| ATOM | 5351 | OE2 | GLU | A | 327 | 30.195 | -2.095  | 10.541 |
| ATOM | 5352 | C   | GLU | A | 327 | 26.461 | -5.754  | 8.451  |



|      |      |      |     |   |     |        |         |        |
|------|------|------|-----|---|-----|--------|---------|--------|
| ATOM | 5353 | O    | GLU | A | 327 | 26.997 | -5.342  | 7.420  |
| ATOM | 5354 | N    | LEU | A | 328 | 25.851 | -6.949  | 8.492  |
| ATOM | 5355 | H    | LEU | A | 328 | 25.375 | -7.211  | 9.346  |
| ATOM | 5356 | CA   | LEU | A | 328 | 25.797 | -7.923  | 7.395  |
| ATOM | 5357 | HA   | LEU | A | 328 | 26.555 | -7.665  | 6.660  |
| ATOM | 5358 | CB   | LEU | A | 328 | 26.135 | -9.311  | 7.989  |
| ATOM | 5359 | HB2  | LEU | A | 328 | 27.016 | -9.222  | 8.626  |
| ATOM | 5360 | HB3  | LEU | A | 328 | 25.306 | -9.619  | 8.625  |
| ATOM | 5361 | CG   | LEU | A | 328 | 26.396 | -10.438 | 6.973  |
| ATOM | 5362 | HG   | LEU | A | 328 | 25.558 | -10.499 | 6.279  |
| ATOM | 5363 | CD1  | LEU | A | 328 | 27.690 | -10.206 | 6.182  |
| ATOM | 5364 | HD11 | LEU | A | 328 | 27.610 | -9.292  | 5.599  |
| ATOM | 5365 | HD12 | LEU | A | 328 | 28.539 | -10.127 | 6.863  |
| ATOM | 5366 | HD13 | LEU | A | 328 | 27.860 | -11.036 | 5.495  |
| ATOM | 5367 | CD2  | LEU | A | 328 | 26.510 | -11.771 | 7.727  |
| ATOM | 5368 | HD21 | LEU | A | 328 | 26.681 | -12.585 | 7.021  |
| ATOM | 5369 | HD22 | LEU | A | 328 | 27.340 | -11.730 | 8.434  |
| ATOM | 5370 | HD23 | LEU | A | 328 | 25.587 | -11.969 | 8.274  |
| ATOM | 5371 | C    | LEU | A | 328 | 24.415 | -7.889  | 6.708  |
| ATOM | 5372 | O    | LEU | A | 328 | 23.428 | -8.361  | 7.272  |
| ATOM | 5373 | N    | ASP | A | 329 | 24.345 | -7.338  | 5.492  |
| ATOM | 5374 | H    | ASP | A | 329 | 25.219 | -6.998  | 5.103  |
| ATOM | 5375 | CA   | ASP | A | 329 | 23.109 | -7.133  | 4.706  |
| ATOM | 5376 | HA   | ASP | A | 329 | 22.553 | -8.070  | 4.758  |
| ATOM | 5377 | CB   | ASP | A | 329 | 22.211 | -6.073  | 5.377  |
| ATOM | 5378 | HB2  | ASP | A | 329 | 21.274 | -5.998  | 4.825  |
| ATOM | 5379 | HB3  | ASP | A | 329 | 21.951 | -6.411  | 6.379  |
| ATOM | 5380 | CG   | ASP | A | 329 | 22.836 | -4.682  | 5.471  |
| ATOM | 5381 | OD1  | ASP | A | 329 | 23.325 | -4.147  | 4.454  |
| ATOM | 5382 | OD2  | ASP | A | 329 | 22.783 | -4.050  | 6.552  |
| ATOM | 5383 | C    | ASP | A | 329 | 23.304 | -6.873  | 3.187  |
| ATOM | 5384 | O    | ASP | A | 329 | 22.337 | -6.567  | 2.483  |
| ATOM | 5385 | N    | ASP | A | 330 | 24.513 | -7.068  | 2.645  |
| ATOM | 5386 | H    | ASP | A | 330 | 25.271 | -7.288  | 3.282  |
| ATOM | 5387 | CA   | ASP | A | 330 | 24.814 | -7.182  | 1.198  |
| ATOM | 5388 | HA   | ASP | A | 330 | 24.220 | -6.440  | 0.664  |
| ATOM | 5389 | CB   | ASP | A | 330 | 26.294 | -6.840  | 0.946  |
| ATOM | 5390 | HB2  | ASP | A | 330 | 26.481 | -5.826  | 1.295  |
| ATOM | 5391 | HB3  | ASP | A | 330 | 26.916 | -7.508  | 1.535  |
| ATOM | 5392 | CG   | ASP | A | 330 | 26.715 | -6.920  | -0.527 |
| ATOM | 5393 | OD1  | ASP | A | 330 | 26.096 | -6.250  | -1.380 |
| ATOM | 5394 | OD2  | ASP | A | 330 | 27.701 | -7.631  | -0.837 |
| ATOM | 5395 | C    | ASP | A | 330 | 24.389 | -8.571  | 0.662  |
| ATOM | 5396 | O    | ASP | A | 330 | 25.134 | -9.297  | -0.003 |
| ATOM | 5397 | N    | LEU | A | 331 | 23.170 | -8.960  | 1.035  |
| ATOM | 5398 | H    | LEU | A | 331 | 22.652 | -8.292  | 1.593  |
| ATOM | 5399 | CA   | LEU | A | 331 | 22.479 | -10.199 | 0.697  |
| ATOM | 5400 | HA   | LEU | A | 331 | 23.199 | -10.932 | 0.328  |
| ATOM | 5401 | CB   | LEU | A | 331 | 21.805 | -10.739 | 1.977  |
| ATOM | 5402 | HB2  | LEU | A | 331 | 21.392 | -9.900  | 2.539  |
| ATOM | 5403 | HB3  | LEU | A | 331 | 20.960 | -11.363 | 1.684  |
| ATOM | 5404 | CG   | LEU | A | 331 | 22.692 | -11.585 | 2.917  |
| ATOM | 5405 | HG   | LEU | A | 331 | 22.942 | -12.516 | 2.407  |
| ATOM | 5406 | CD1  | LEU | A | 331 | 24.002 | -10.909 | 3.352  |
| ATOM | 5407 | HD11 | LEU | A | 331 | 23.793 | -9.937  | 3.800  |
| ATOM | 5408 | HD12 | LEU | A | 331 | 24.516 | -11.534 | 4.083  |
| ATOM | 5409 | HD13 | LEU | A | 331 | 24.663 | -10.783 | 2.494  |

|      |      |      |     |   |     |        |         |        |
|------|------|------|-----|---|-----|--------|---------|--------|
| ATOM | 5410 | CD2  | LEU | A | 331 | 21.872 | -11.925 | 4.171  |
| ATOM | 5411 | HD21 | LEU | A | 331 | 21.634 | -11.008 | 4.711  |
| ATOM | 5412 | HD22 | LEU | A | 331 | 20.946 | -12.429 | 3.890  |
| ATOM | 5413 | HD23 | LEU | A | 331 | 22.446 | -12.586 | 4.823  |
| ATOM | 5414 | C    | LEU | A | 331 | 21.421 | -9.911  | -0.393 |
| ATOM | 5415 | O    | LEU | A | 331 | 20.883 | -8.795  | -0.424 |
| ATOM | 5416 | N    | PRO | A | 332 | 21.099 | -10.891 | -1.262 |
| ATOM | 5417 | CD   | PRO | A | 332 | 21.749 | -12.192 | -1.379 |
| ATOM | 5418 | HD2  | PRO | A | 332 | 21.752 | -12.725 | -0.428 |
| ATOM | 5419 | HD3  | PRO | A | 332 | 22.772 | -12.057 | -1.735 |
| ATOM | 5420 | CG   | PRO | A | 332 | 20.950 | -12.971 | -2.423 |
| ATOM | 5421 | HG2  | PRO | A | 332 | 20.140 | -13.516 | -1.943 |
| ATOM | 5422 | HG3  | PRO | A | 332 | 21.583 | -13.646 | -2.996 |
| ATOM | 5423 | CB   | PRO | A | 332 | 20.365 | -11.867 | -3.298 |
| ATOM | 5424 | HB2  | PRO | A | 332 | 19.475 | -12.199 | -3.832 |
| ATOM | 5425 | HB3  | PRO | A | 332 | 21.123 | -11.523 | -4.003 |
| ATOM | 5426 | CA   | PRO | A | 332 | 20.066 | -10.758 | -2.286 |
| ATOM | 5427 | HA   | PRO | A | 332 | 20.168 | -9.796  | -2.786 |
| ATOM | 5428 | C    | PRO | A | 332 | 18.649 | -10.867 | -1.697 |
| ATOM | 5429 | O    | PRO | A | 332 | 18.458 | -11.259 | -0.543 |
| ATOM | 5430 | N    | LYS | A | 333 | 17.639 | -10.525 | -2.509 |
| ATOM | 5431 | H    | LYS | A | 333 | 17.877 | -10.237 | -3.450 |
| ATOM | 5432 | CA   | LYS | A | 333 | 16.255 | -10.297 | -2.064 |
| ATOM | 5433 | HA   | LYS | A | 333 | 16.274 | -9.462  | -1.361 |
| ATOM | 5434 | CB   | LYS | A | 333 | 15.424 | -9.864  | -3.291 |
| ATOM | 5435 | HB2  | LYS | A | 333 | 15.987 | -9.100  | -3.831 |
| ATOM | 5436 | HB3  | LYS | A | 333 | 15.279 | -10.715 | -3.960 |
| ATOM | 5437 | CG   | LYS | A | 333 | 14.060 | -9.267  | -2.898 |
| ATOM | 5438 | HG2  | LYS | A | 333 | 13.421 | -10.039 | -2.468 |
| ATOM | 5439 | HG3  | LYS | A | 333 | 14.232 | -8.504  | -2.137 |
| ATOM | 5440 | CD   | LYS | A | 333 | 13.345 | -8.593  | -4.082 |
| ATOM | 5441 | HD2  | LYS | A | 333 | 12.590 | -7.914  | -3.689 |
| ATOM | 5442 | HD3  | LYS | A | 333 | 14.066 | -7.975  | -4.620 |
| ATOM | 5443 | CE   | LYS | A | 333 | 12.676 | -9.536  | -5.096 |
| ATOM | 5444 | HE2  | LYS | A | 333 | 12.437 | -8.931  | -5.976 |
| ATOM | 5445 | HE3  | LYS | A | 333 | 13.375 | -10.312 | -5.414 |
| ATOM | 5446 | NZ   | LYS | A | 333 | 11.409 | -10.129 | -4.601 |
| ATOM | 5447 | HZ1  | LYS | A | 333 | 11.557 | -10.937 | -4.001 |
| ATOM | 5448 | HZ2  | LYS | A | 333 | 10.882 | -9.438  | -4.074 |
| ATOM | 5449 | HZ3  | LYS | A | 333 | 10.838 | -10.430 | -5.378 |
| ATOM | 5450 | C    | LYS | A | 333 | 15.613 | -11.471 | -1.295 |
| ATOM | 5451 | O    | LYS | A | 333 | 14.988 | -11.231 | -0.263 |
| ATOM | 5452 | N    | GLU | A | 334 | 15.769 | -12.721 | -1.750 |
| ATOM | 5453 | H    | GLU | A | 334 | 16.305 | -12.868 | -2.591 |
| ATOM | 5454 | CA   | GLU | A | 334 | 15.169 | -13.879 | -1.063 |
| ATOM | 5455 | HA   | GLU | A | 334 | 14.131 | -13.622 | -0.845 |
| ATOM | 5456 | CB   | GLU | A | 334 | 15.143 | -15.117 | -1.982 |
| ATOM | 5457 | HB2  | GLU | A | 334 | 14.715 | -14.828 | -2.943 |
| ATOM | 5458 | HB3  | GLU | A | 334 | 16.158 | -15.482 | -2.145 |
| ATOM | 5459 | CG   | GLU | A | 334 | 14.279 | -16.241 | -1.386 |
| ATOM | 5460 | HG2  | GLU | A | 334 | 14.773 | -16.651 | -0.504 |
| ATOM | 5461 | HG3  | GLU | A | 334 | 13.321 | -15.827 | -1.069 |
| ATOM | 5462 | CD   | GLU | A | 334 | 14.011 | -17.368 | -2.386 |
| ATOM | 5463 | OE1  | GLU | A | 334 | 14.715 | -18.406 | -2.343 |
| ATOM | 5464 | OE2  | GLU | A | 334 | 13.049 | -17.250 | -3.179 |
| ATOM | 5465 | C    | GLU | A | 334 | 15.858 | -14.170 | 0.285  |
| ATOM | 5466 | O    | GLU | A | 334 | 15.188 | -14.467 | 1.269  |

|      |      |      |     |   |     |        |         |        |
|------|------|------|-----|---|-----|--------|---------|--------|
| ATOM | 5467 | N    | LYS | A | 335 | 17.180 | -13.998 | 0.387  |
| ATOM | 5468 | H    | LYS | A | 335 | 17.701 | -13.710 | -0.427 |
| ATOM | 5469 | CA   | LYS | A | 335 | 17.914 | -14.188 | 1.650  |
| ATOM | 5470 | HA   | LYS | A | 335 | 17.645 | -15.153 | 2.083  |
| ATOM | 5471 | CB   | LYS | A | 335 | 19.428 | -14.188 | 1.369  |
| ATOM | 5472 | HB2  | LYS | A | 335 | 19.714 | -13.212 | 0.975  |
| ATOM | 5473 | HB3  | LYS | A | 335 | 19.962 | -14.334 | 2.310  |
| ATOM | 5474 | CG   | LYS | A | 335 | 19.887 | -15.267 | 0.372  |
| ATOM | 5475 | HG2  | LYS | A | 335 | 19.387 | -15.105 | -0.582 |
| ATOM | 5476 | HG3  | LYS | A | 335 | 20.957 | -15.133 | 0.210  |
| ATOM | 5477 | CD   | LYS | A | 335 | 19.623 | -16.715 | 0.808  |
| ATOM | 5478 | HD2  | LYS | A | 335 | 20.074 | -16.895 | 1.785  |
| ATOM | 5479 | HD3  | LYS | A | 335 | 18.550 | -16.896 | 0.871  |
| ATOM | 5480 | CE   | LYS | A | 335 | 20.243 | -17.640 | -0.245 |
| ATOM | 5481 | HE2  | LYS | A | 335 | 19.778 | -17.438 | -1.214 |
| ATOM | 5482 | HE3  | LYS | A | 335 | 21.307 | -17.407 | -0.334 |
| ATOM | 5483 | NZ   | LYS | A | 335 | 20.083 | -19.068 | 0.099  |
| ATOM | 5484 | HZ1  | LYS | A | 335 | 20.436 | -19.674 | -0.635 |
| ATOM | 5485 | HZ2  | LYS | A | 335 | 20.583 | -19.313 | 0.945  |
| ATOM | 5486 | HZ3  | LYS | A | 335 | 19.116 | -19.319 | 0.270  |
| ATOM | 5487 | C    | LYS | A | 335 | 17.521 | -13.132 | 2.701  |
| ATOM | 5488 | O    | LYS | A | 335 | 17.288 | -13.462 | 3.862  |
| ATOM | 5489 | N    | LEU | A | 336 | 17.347 | -11.865 | 2.301  |
| ATOM | 5490 | H    | LEU | A | 336 | 17.548 | -11.640 | 1.335  |
| ATOM | 5491 | CA   | LEU | A | 336 | 16.779 | -10.821 | 3.172  |
| ATOM | 5492 | HA   | LEU | A | 336 | 17.358 | -10.774 | 4.095  |
| ATOM | 5493 | CB   | LEU | A | 336 | 16.853 | -9.456  | 2.459  |
| ATOM | 5494 | HB2  | LEU | A | 336 | 16.361 | -9.548  | 1.489  |
| ATOM | 5495 | HB3  | LEU | A | 336 | 16.291 | -8.729  | 3.050  |
| ATOM | 5496 | CG   | LEU | A | 336 | 18.281 | -8.904  | 2.255  |
| ATOM | 5497 | HG   | LEU | A | 336 | 18.900 | -9.659  | 1.770  |
| ATOM | 5498 | CD1  | LEU | A | 336 | 18.209 | -7.683  | 1.331  |
| ATOM | 5499 | HD11 | LEU | A | 336 | 17.537 | -6.936  | 1.750  |
| ATOM | 5500 | HD12 | LEU | A | 336 | 19.200 | -7.247  | 1.210  |
| ATOM | 5501 | HD13 | LEU | A | 336 | 17.838 | -7.985  | 0.353  |
| ATOM | 5502 | CD2  | LEU | A | 336 | 18.939 | -8.504  | 3.586  |
| ATOM | 5503 | HD21 | LEU | A | 336 | 19.094 | -9.383  | 4.209  |
| ATOM | 5504 | HD22 | LEU | A | 336 | 19.910 | -8.047  | 3.397  |
| ATOM | 5505 | HD23 | LEU | A | 336 | 18.311 | -7.791  | 4.121  |
| ATOM | 5506 | C    | LEU | A | 336 | 15.338 | -11.162 | 3.603  |
| ATOM | 5507 | O    | LEU | A | 336 | 14.990 | -11.004 | 4.776  |
| ATOM | 5508 | N    | LYS | A | 337 | 14.520 | -11.717 | 2.697  |
| ATOM | 5509 | H    | LYS | A | 337 | 14.832 | -11.787 | 1.735  |
| ATOM | 5510 | CA   | LYS | A | 337 | 13.195 | -12.254 | 3.041  |
| ATOM | 5511 | HA   | LYS | A | 337 | 12.638 | -11.462 | 3.546  |
| ATOM | 5512 | CB   | LYS | A | 337 | 12.422 | -12.616 | 1.750  |
| ATOM | 5513 | HB2  | LYS | A | 337 | 12.376 | -11.731 | 1.112  |
| ATOM | 5514 | HB3  | LYS | A | 337 | 12.952 | -13.396 | 1.208  |
| ATOM | 5515 | CG   | LYS | A | 337 | 10.991 | -13.102 | 2.035  |
| ATOM | 5516 | HG2  | LYS | A | 337 | 11.041 | -14.018 | 2.620  |
| ATOM | 5517 | HG3  | LYS | A | 337 | 10.479 | -12.350 | 2.631  |
| ATOM | 5518 | CD   | LYS | A | 337 | 10.173 | -13.370 | 0.763  |
| ATOM | 5519 | HD2  | LYS | A | 337 | 10.012 | -12.434 | 0.228  |
| ATOM | 5520 | HD3  | LYS | A | 337 | 10.711 | -14.069 | 0.119  |
| ATOM | 5521 | CE   | LYS | A | 337 | 8.830  | -13.976 | 1.184  |
| ATOM | 5522 | HE2  | LYS | A | 337 | 9.021  | -14.912 | 1.706  |
| ATOM | 5523 | HE3  | LYS | A | 337 | 8.335  | -13.302 | 1.888  |

|      |      |      |     |   |     |        |         |        |
|------|------|------|-----|---|-----|--------|---------|--------|
| ATOM | 5524 | NZ   | LYS | A | 337 | 7.909  | -14.247 | 0.056  |
| ATOM | 5525 | HZ1  | LYS | A | 337 | 8.388  | -14.371 | -0.831 |
| ATOM | 5526 | HZ2  | LYS | A | 337 | 7.376  | -15.088 | 0.260  |
| ATOM | 5527 | HZ3  | LYS | A | 337 | 7.238  | -13.494 | -0.028 |
| ATOM | 5528 | C    | LYS | A | 337 | 13.291 | -13.415 | 4.056  |
| ATOM | 5529 | O    | LYS | A | 337 | 12.466 | -13.452 | 4.968  |
| ATOM | 5530 | N    | GLU | A | 338 | 14.285 | -14.310 | 3.960  |
| ATOM | 5531 | H    | GLU | A | 338 | 14.875 | -14.279 | 3.133  |
| ATOM | 5532 | CA   | GLU | A | 338 | 14.536 | -15.352 | 4.971  |
| ATOM | 5533 | HA   | GLU | A | 338 | 13.611 | -15.911 | 5.113  |
| ATOM | 5534 | CB   | GLU | A | 338 | 15.621 | -16.354 | 4.537  |
| ATOM | 5535 | HB2  | GLU | A | 338 | 16.525 | -15.835 | 4.231  |
| ATOM | 5536 | HB3  | GLU | A | 338 | 15.871 | -16.966 | 5.405  |
| ATOM | 5537 | CG   | GLU | A | 338 | 15.168 | -17.289 | 3.413  |
| ATOM | 5538 | HG2  | GLU | A | 338 | 14.151 | -17.616 | 3.607  |
| ATOM | 5539 | HG3  | GLU | A | 338 | 15.200 | -16.772 | 2.457  |
| ATOM | 5540 | CD   | GLU | A | 338 | 16.040 | -18.532 | 3.354  |
| ATOM | 5541 | OE1  | GLU | A | 338 | 15.707 | -19.533 | 4.026  |
| ATOM | 5542 | OE2  | GLU | A | 338 | 17.099 | -18.527 | 2.692  |
| ATOM | 5543 | C    | GLU | A | 338 | 14.911 | -14.774 | 6.344  |
| ATOM | 5544 | O    | GLU | A | 338 | 14.395 | -15.259 | 7.351  |
| ATOM | 5545 | N    | LEU | A | 339 | 15.741 | -13.721 | 6.417  |
| ATOM | 5546 | H    | LEU | A | 339 | 16.195 | -13.393 | 5.571  |
| ATOM | 5547 | CA   | LEU | A | 339 | 16.067 | -13.080 | 7.701  |
| ATOM | 5548 | HA   | LEU | A | 339 | 16.466 | -13.842 | 8.371  |
| ATOM | 5549 | CB   | LEU | A | 339 | 17.122 | -11.966 | 7.544  |
| ATOM | 5550 | HB2  | LEU | A | 339 | 16.702 | -11.165 | 6.936  |
| ATOM | 5551 | HB3  | LEU | A | 339 | 17.297 | -11.565 | 8.544  |
| ATOM | 5552 | CG   | LEU | A | 339 | 18.492 | -12.355 | 6.951  |
| ATOM | 5553 | HG   | LEU | A | 339 | 18.378 | -12.557 | 5.888  |
| ATOM | 5554 | CD1  | LEU | A | 339 | 19.445 | -11.161 | 7.108  |
| ATOM | 5555 | HD11 | LEU | A | 339 | 19.572 | -10.909 | 8.163  |
| ATOM | 5556 | HD12 | LEU | A | 339 | 20.419 | -11.406 | 6.689  |
| ATOM | 5557 | HD13 | LEU | A | 339 | 19.046 | -10.295 | 6.581  |
| ATOM | 5558 | CD2  | LEU | A | 339 | 19.115 | -13.592 | 7.611  |
| ATOM | 5559 | HD21 | LEU | A | 339 | 19.224 | -13.431 | 8.684  |
| ATOM | 5560 | HD22 | LEU | A | 339 | 18.491 | -14.466 | 7.431  |
| ATOM | 5561 | HD23 | LEU | A | 339 | 20.096 | -13.786 | 7.178  |
| ATOM | 5562 | C    | LEU | A | 339 | 14.806 | -12.536 | 8.387  |
| ATOM | 5563 | O    | LEU | A | 339 | 14.564 | -12.836 | 9.555  |
| ATOM | 5564 | N    | ILE | A | 340 | 13.961 | -11.795 | 7.657  |
| ATOM | 5565 | H    | ILE | A | 340 | 14.222 | -11.601 | 6.696  |
| ATOM | 5566 | CA   | ILE | A | 340 | 12.664 | -11.309 | 8.180  |
| ATOM | 5567 | HA   | ILE | A | 340 | 12.847 | -10.755 | 9.100  |
| ATOM | 5568 | CB   | ILE | A | 340 | 11.978 | -10.347 | 7.172  |
| ATOM | 5569 | HB   | ILE | A | 340 | 11.892 | -10.856 | 6.212  |
| ATOM | 5570 | CG2  | ILE | A | 340 | 10.555 | -9.973  | 7.649  |
| ATOM | 5571 | HG21 | ILE | A | 340 | 9.926  | -10.861 | 7.719  |
| ATOM | 5572 | HG22 | ILE | A | 340 | 10.604 | -9.490  | 8.626  |
| ATOM | 5573 | HG23 | ILE | A | 340 | 10.070 | -9.299  | 6.944  |
| ATOM | 5574 | CG1  | ILE | A | 340 | 12.841 | -9.073  | 6.981  |
| ATOM | 5575 | HG12 | ILE | A | 340 | 12.932 | -8.557  | 7.939  |
| ATOM | 5576 | HG13 | ILE | A | 340 | 13.839 | -9.368  | 6.655  |
| ATOM | 5577 | CD1  | ILE | A | 340 | 12.318 | -8.073  | 5.940  |
| ATOM | 5578 | HD11 | ILE | A | 340 | 13.032 | -7.258  | 5.832  |
| ATOM | 5579 | HD12 | ILE | A | 340 | 12.212 | -8.564  | 4.975  |
| ATOM | 5580 | HD13 | ILE | A | 340 | 11.365 | -7.646  | 6.248  |

|      |      |     |     |   |     |        |         |        |
|------|------|-----|-----|---|-----|--------|---------|--------|
| ATOM | 5581 | C   | ILE | A | 340 | 11.763 | -12.485 | 8.595  |
| ATOM | 5582 | O   | ILE | A | 340 | 11.155 | -12.443 | 9.666  |
| ATOM | 5583 | N   | PHE | A | 341 | 11.709 | -13.555 | 7.798  |
| ATOM | 5584 | H   | PHE | A | 341 | 12.260 | -13.552 | 6.947  |
| ATOM | 5585 | CA  | PHE | A | 341 | 10.915 | -14.746 | 8.095  |
| ATOM | 5586 | HA  | PHE | A | 341 | 9.872  | -14.446 | 8.215  |
| ATOM | 5587 | CB  | PHE | A | 341 | 11.008 | -15.719 | 6.912  |
| ATOM | 5588 | HB2 | PHE | A | 341 | 10.745 | -15.204 | 5.991  |
| ATOM | 5589 | HB3 | PHE | A | 341 | 12.036 | -16.060 | 6.806  |
| ATOM | 5590 | CG  | PHE | A | 341 | 10.109 | -16.926 | 7.050  |
| ATOM | 5591 | CD1 | PHE | A | 341 | 8.735  | -16.812 | 6.772  |
| ATOM | 5592 | HD1 | PHE | A | 341 | 8.319  | -15.864 | 6.467  |
| ATOM | 5593 | CE1 | PHE | A | 341 | 7.897  | -17.929 | 6.905  |
| ATOM | 5594 | HE1 | PHE | A | 341 | 6.839  | -17.833 | 6.709  |
| ATOM | 5595 | CZ  | PHE | A | 341 | 8.433  | -19.164 | 7.310  |
| ATOM | 5596 | HZ  | PHE | A | 341 | 7.793  | -20.027 | 7.415  |
| ATOM | 5597 | CE2 | PHE | A | 341 | 9.803  | -19.276 | 7.599  |
| ATOM | 5598 | HE2 | PHE | A | 341 | 10.214 | -20.221 | 7.921  |
| ATOM | 5599 | CD2 | PHE | A | 341 | 10.642 | -18.157 | 7.472  |
| ATOM | 5600 | HD2 | PHE | A | 341 | 11.695 | -18.248 | 7.702  |
| ATOM | 5601 | C   | PHE | A | 341 | 11.358 | -15.425 | 9.399  |
| ATOM | 5602 | O   | PHE | A | 341 | 10.511 | -15.782 | 10.218 |
| ATOM | 5603 | N   | GLU | A | 342 | 12.667 | -15.585 | 9.608  |
| ATOM | 5604 | H   | GLU | A | 342 | 13.317 | -15.295 | 8.878  |
| ATOM | 5605 | CA  | GLU | A | 342 | 13.204 | -16.250 | 10.793 |
| ATOM | 5606 | HA  | GLU | A | 342 | 12.584 | -17.127 | 10.987 |
| ATOM | 5607 | CB  | GLU | A | 342 | 14.629 | -16.746 | 10.508 |
| ATOM | 5608 | HB2 | GLU | A | 342 | 14.685 | -17.117 | 9.484  |
| ATOM | 5609 | HB3 | GLU | A | 342 | 15.333 | -15.919 | 10.613 |
| ATOM | 5610 | CG  | GLU | A | 342 | 15.012 | -17.895 | 11.447 |
| ATOM | 5611 | HG2 | GLU | A | 342 | 14.953 | -17.549 | 12.476 |
| ATOM | 5612 | HG3 | GLU | A | 342 | 14.317 | -18.726 | 11.311 |
| ATOM | 5613 | CD  | GLU | A | 342 | 16.433 | -18.370 | 11.180 |
| ATOM | 5614 | OE1 | GLU | A | 342 | 16.639 | -19.412 | 10.514 |
| ATOM | 5615 | OE2 | GLU | A | 342 | 17.384 | -17.659 | 11.575 |
| ATOM | 5616 | C   | GLU | A | 342 | 13.131 | -15.352 | 12.039 |
| ATOM | 5617 | O   | GLU | A | 342 | 12.766 | -15.838 | 13.107 |
| ATOM | 5618 | N   | GLU | A | 343 | 13.378 | -14.041 | 11.921 |
| ATOM | 5619 | H   | GLU | A | 343 | 13.718 | -13.680 | 11.032 |
| ATOM | 5620 | CA  | GLU | A | 343 | 13.190 | -13.094 | 13.032 |
| ATOM | 5621 | HA  | GLU | A | 343 | 13.787 | -13.431 | 13.879 |
| ATOM | 5622 | CB  | GLU | A | 343 | 13.665 | -11.686 | 12.631 |
| ATOM | 5623 | HB2 | GLU | A | 343 | 13.223 | -11.428 | 11.667 |
| ATOM | 5624 | HB3 | GLU | A | 343 | 13.295 | -10.962 | 13.360 |
| ATOM | 5625 | CG  | GLU | A | 343 | 15.194 | -11.541 | 12.533 |
| ATOM | 5626 | HG2 | GLU | A | 343 | 15.589 | -12.305 | 11.864 |
| ATOM | 5627 | HG3 | GLU | A | 343 | 15.412 | -10.566 | 12.094 |
| ATOM | 5628 | CD  | GLU | A | 343 | 15.936 | -11.633 | 13.869 |
| ATOM | 5629 | OE1 | GLU | A | 343 | 15.307 | -11.626 | 14.953 |
| ATOM | 5630 | OE2 | GLU | A | 343 | 17.184 | -11.698 | 13.849 |
| ATOM | 5631 | C   | GLU | A | 343 | 11.723 | -13.037 | 13.503 |
| ATOM | 5632 | O   | GLU | A | 343 | 11.461 | -12.925 | 14.702 |
| ATOM | 5633 | N   | THR | A | 344 | 10.752 | -13.171 | 12.590 |
| ATOM | 5634 | H   | THR | A | 344 | 11.024 | -13.252 | 11.616 |
| ATOM | 5635 | CA  | THR | A | 344 | 9.311  | -13.151 | 12.914 |
| ATOM | 5636 | HA  | THR | A | 344 | 9.169  | -12.489 | 13.768 |
| ATOM | 5637 | CB  | THR | A | 344 | 8.494  | -12.583 | 11.751 |

|      |      |      |     |   |     |        |         |        |
|------|------|------|-----|---|-----|--------|---------|--------|
| ATOM | 5638 | HB   | THR | A | 344 | 7.433  | -12.688 | 11.981 |
| ATOM | 5639 | CG2  | THR | A | 344 | 8.783  | -11.100 | 11.538 |
| ATOM | 5640 | HG21 | THR | A | 344 | 9.817  | -10.939 | 11.239 |
| ATOM | 5641 | HG22 | THR | A | 344 | 8.116  | -10.706 | 10.771 |
| ATOM | 5642 | HG23 | THR | A | 344 | 8.608  | -10.572 | 12.473 |
| ATOM | 5643 | OG1  | THR | A | 344 | 8.787  | -13.291 | 10.570 |
| ATOM | 5644 | HG1  | THR | A | 344 | 9.626  | -12.931 | 10.218 |
| ATOM | 5645 | C    | THR | A | 344 | 8.729  | -14.495 | 13.345 |
| ATOM | 5646 | O    | THR | A | 344 | 7.577  | -14.529 | 13.780 |
| ATOM | 5647 | N    | ALA | A | 345 | 9.477  | -15.599 | 13.254 |
| ATOM | 5648 | H    | ALA | A | 345 | 10.431 | -15.513 | 12.923 |
| ATOM | 5649 | CA   | ALA | A | 345 | 8.961  | -16.940 | 13.548 |
| ATOM | 5650 | HA   | ALA | A | 345 | 8.082  | -17.120 | 12.931 |
| ATOM | 5651 | CB   | ALA | A | 345 | 10.034 | -17.966 | 13.163 |
| ATOM | 5652 | HB1  | ALA | A | 345 | 9.659  | -18.974 | 13.349 |
| ATOM | 5653 | HB2  | ALA | A | 345 | 10.287 | -17.872 | 12.107 |
| ATOM | 5654 | HB3  | ALA | A | 345 | 10.936 | -17.806 | 13.754 |
| ATOM | 5655 | C    | ALA | A | 345 | 8.497  | -17.105 | 15.006 |
| ATOM | 5656 | O    | ALA | A | 345 | 7.441  | -17.691 | 15.247 |
| ATOM | 5657 | N    | ARG | A | 346 | 9.220  | -16.516 | 15.969 |
| ATOM | 5658 | H    | ARG | A | 346 | 10.072 | -16.050 | 15.690 |
| ATOM | 5659 | CA   | ARG | A | 346 | 8.962  | -16.670 | 17.410 |
| ATOM | 5660 | HA   | ARG | A | 346 | 9.036  | -17.737 | 17.625 |
| ATOM | 5661 | CB   | ARG | A | 346 | 10.076 | -15.971 | 18.212 |
| ATOM | 5662 | HB2  | ARG | A | 346 | 10.009 | -16.302 | 19.245 |
| ATOM | 5663 | HB3  | ARG | A | 346 | 11.041 | -16.307 | 17.835 |
| ATOM | 5664 | CG   | ARG | A | 346 | 10.023 | -14.431 | 18.169 |
| ATOM | 5665 | HG2  | ARG | A | 346 | 10.210 | -14.091 | 17.151 |
| ATOM | 5666 | HG3  | ARG | A | 346 | 9.026  | -14.103 | 18.458 |
| ATOM | 5667 | CD   | ARG | A | 346 | 11.013 | -13.738 | 19.121 |
| ATOM | 5668 | HD2  | ARG | A | 346 | 10.890 | -12.662 | 19.003 |
| ATOM | 5669 | HD3  | ARG | A | 346 | 10.759 | -13.985 | 20.152 |
| ATOM | 5670 | NE   | ARG | A | 346 | 12.421 | -14.072 | 18.837 |
| ATOM | 5671 | HE   | ARG | A | 346 | 12.866 | -13.562 | 18.081 |
| ATOM | 5672 | CZ   | ARG | A | 346 | 13.150 | -15.030 | 19.395 |
| ATOM | 5673 | NH1  | ARG | A | 346 | 12.699 | -15.757 | 20.391 |
| ATOM | 5674 | HH11 | ARG | A | 346 | 11.853 | -15.493 | 20.888 |
| ATOM | 5675 | HH12 | ARG | A | 346 | 13.258 | -16.514 | 20.755 |
| ATOM | 5676 | NH2  | ARG | A | 346 | 14.363 | -15.287 | 18.959 |
| ATOM | 5677 | HH21 | ARG | A | 346 | 14.768 | -14.786 | 18.175 |
| ATOM | 5678 | HH22 | ARG | A | 346 | 14.909 | -16.007 | 19.417 |
| ATOM | 5679 | C    | ARG | A | 346 | 7.562  | -16.233 | 17.894 |
| ATOM | 5680 | O    | ARG | A | 346 | 7.219  | -16.513 | 19.041 |
| ATOM | 5681 | N    | PHE | A | 347 | 6.768  | -15.539 | 17.066 |
| ATOM | 5682 | H    | PHE | A | 347 | 7.134  | -15.326 | 16.148 |
| ATOM | 5683 | CA   | PHE | A | 347 | 5.420  | -15.039 | 17.388 |
| ATOM | 5684 | HA   | PHE | A | 347 | 5.256  | -15.105 | 18.467 |
| ATOM | 5685 | CB   | PHE | A | 347 | 5.329  | -13.561 | 16.964 |
| ATOM | 5686 | HB2  | PHE | A | 347 | 5.232  | -13.516 | 15.880 |
| ATOM | 5687 | HB3  | PHE | A | 347 | 4.410  | -13.151 | 17.380 |
| ATOM | 5688 | CG   | PHE | A | 347 | 6.479  | -12.665 | 17.387 |
| ATOM | 5689 | CD1  | PHE | A | 347 | 6.609  | -12.274 | 18.731 |
| ATOM | 5690 | HD1  | PHE | A | 347 | 5.884  | -12.603 | 19.463 |
| ATOM | 5691 | CE1  | PHE | A | 347 | 7.678  | -11.454 | 19.125 |
| ATOM | 5692 | HE1  | PHE | A | 347 | 7.769  | -11.169 | 20.159 |
| ATOM | 5693 | CZ   | PHE | A | 347 | 8.621  | -11.015 | 18.179 |
| ATOM | 5694 | HZ   | PHE | A | 347 | 9.437  | -10.373 | 18.480 |

|      |      |      |     |   |     |        |         |        |
|------|------|------|-----|---|-----|--------|---------|--------|
| ATOM | 5695 | CE2  | PHE | A | 347 | 8.502  | -11.412 | 16.837 |
| ATOM | 5696 | HE2  | PHE | A | 347 | 9.241  | -11.096 | 16.113 |
| ATOM | 5697 | CD2  | PHE | A | 347 | 7.426  | -12.226 | 16.440 |
| ATOM | 5698 | HD2  | PHE | A | 347 | 7.325  | -12.509 | 15.403 |
| ATOM | 5699 | C    | PHE | A | 347 | 4.275  | -15.830 | 16.715 |
| ATOM | 5700 | O    | PHE | A | 347 | 3.103  | -15.462 | 16.856 |
| ATOM | 5701 | N    | GLN | A | 348 | 4.586  | -16.875 | 15.942 |
| ATOM | 5702 | H    | GLN | A | 348 | 5.560  | -17.153 | 15.865 |
| ATOM | 5703 | CA   | GLN | A | 348 | 3.614  | -17.624 | 15.138 |
| ATOM | 5704 | HA   | GLN | A | 348 | 2.959  | -16.904 | 14.649 |
| ATOM | 5705 | CB   | GLN | A | 348 | 4.398  | -18.406 | 14.068 |
| ATOM | 5706 | HB2  | GLN | A | 348 | 5.253  | -18.876 | 14.546 |
| ATOM | 5707 | HB3  | GLN | A | 348 | 3.781  | -19.201 | 13.652 |
| ATOM | 5708 | CG   | GLN | A | 348 | 4.918  | -17.539 | 12.912 |
| ATOM | 5709 | HG2  | GLN | A | 348 | 5.462  | -16.677 | 13.300 |
| ATOM | 5710 | HG3  | GLN | A | 348 | 5.615  | -18.136 | 12.325 |
| ATOM | 5711 | CD   | GLN | A | 348 | 3.789  | -17.084 | 11.993 |
| ATOM | 5712 | OE1  | GLN | A | 348 | 3.163  | -17.869 | 11.303 |
| ATOM | 5713 | NE2  | GLN | A | 348 | 3.458  | -15.816 | 11.960 |
| ATOM | 5714 | HE21 | GLN | A | 348 | 2.774  | -15.543 | 11.265 |
| ATOM | 5715 | HE22 | GLN | A | 348 | 3.990  | -15.128 | 12.491 |
| ATOM | 5716 | C    | GLN | A | 348 | 2.711  | -18.566 | 15.975 |
| ATOM | 5717 | O    | GLN | A | 348 | 3.010  | -18.830 | 17.148 |
| ATOM | 5718 | N    | PRO | A | 349 | 1.611  | -19.094 | 15.391 |
| ATOM | 5719 | CD   | PRO | A | 349 | 1.001  | -18.662 | 14.138 |
| ATOM | 5720 | HD2  | PRO | A | 349 | 1.535  | -19.106 | 13.298 |
| ATOM | 5721 | HD3  | PRO | A | 349 | 0.981  | -17.576 | 14.047 |
| ATOM | 5722 | CG   | PRO | A | 349 | -0.428 | -19.201 | 14.170 |
| ATOM | 5723 | HG2  | PRO | A | 349 | -0.823 | -19.368 | 13.166 |
| ATOM | 5724 | HG3  | PRO | A | 349 | -1.070 | -18.519 | 14.732 |
| ATOM | 5725 | CB   | PRO | A | 349 | -0.266 | -20.510 | 14.940 |
| ATOM | 5726 | HB2  | PRO | A | 349 | 0.089  | -21.286 | 14.260 |
| ATOM | 5727 | HB3  | PRO | A | 349 | -1.197 | -20.819 | 15.417 |
| ATOM | 5728 | CA   | PRO | A | 349 | 0.812  | -20.168 | 15.975 |
| ATOM | 5729 | HA   | PRO | A | 349 | 0.319  | -19.792 | 16.868 |
| ATOM | 5730 | C    | PRO | A | 349 | 1.674  | -21.382 | 16.334 |
| ATOM | 5731 | O    | PRO | A | 349 | 2.440  | -21.870 | 15.507 |
| ATOM | 5732 | N    | GLY | A | 350 | 1.558  | -21.851 | 17.580 |
| ATOM | 5733 | H    | GLY | A | 350 | 0.879  | -21.412 | 18.189 |
| ATOM | 5734 | CA   | GLY | A | 350 | 2.331  | -22.968 | 18.134 |
| ATOM | 5735 | HA2  | GLY | A | 350 | 1.726  | -23.480 | 18.880 |
| ATOM | 5736 | HA3  | GLY | A | 350 | 2.581  | -23.662 | 17.331 |
| ATOM | 5737 | C    | GLY | A | 350 | 3.645  | -22.563 | 18.809 |
| ATOM | 5738 | O    | GLY | A | 350 | 4.092  | -23.273 | 19.709 |
| ATOM | 5739 | N    | TYR | A | 351 | 4.254  | -21.437 | 18.422 |
| ATOM | 5740 | H    | TYR | A | 351 | 3.800  | -20.880 | 17.710 |
| ATOM | 5741 | CA   | TYR | A | 351 | 5.585  | -21.003 | 18.888 |
| ATOM | 5742 | HA   | TYR | A | 351 | 6.219  | -21.886 | 18.987 |
| ATOM | 5743 | CB   | TYR | A | 351 | 6.243  | -20.092 | 17.833 |
| ATOM | 5744 | HB2  | TYR | A | 351 | 5.560  | -19.284 | 17.573 |
| ATOM | 5745 | HB3  | TYR | A | 351 | 7.124  | -19.618 | 18.266 |
| ATOM | 5746 | CG   | TYR | A | 351 | 6.687  | -20.791 | 16.561 |
| ATOM | 5747 | CD1  | TYR | A | 351 | 5.737  | -21.190 | 15.604 |
| ATOM | 5748 | HD1  | TYR | A | 351 | 4.691  | -21.014 | 15.789 |
| ATOM | 5749 | CE1  | TYR | A | 351 | 6.139  | -21.765 | 14.386 |
| ATOM | 5750 | HE1  | TYR | A | 351 | 5.396  | -22.038 | 13.651 |
| ATOM | 5751 | CZ   | TYR | A | 351 | 7.513  | -21.959 | 14.124 |

|      |      |      |       |     |        |         |         |        |
|------|------|------|-------|-----|--------|---------|---------|--------|
| ATOM | 5752 | OH   | TYR   | A   | 351    | 7.918   | -22.474 | 12.933 |
| ATOM | 5753 | HH   | TYR   | A   | 351    | 7.184   | -22.653 | 12.343 |
| ATOM | 5754 | CE2  | TYR   | A   | 351    | 8.468   | -21.596 | 15.098 |
| ATOM | 5755 | HE2  | TYR   | A   | 351    | 9.518   | -21.749 | 14.898 |
| ATOM | 5756 | CD2  | TYR   | A   | 351    | 8.055   | -21.010 | 16.310 |
| ATOM | 5757 | HD2  | TYR   | A   | 351    | 8.797   | -20.708 | 17.035 |
| ATOM | 5758 | C    | TYR   | A   | 351    | 5.567   | -20.319 | 20.272 |
| ATOM | 5759 | O    | TYR   | A   | 351    | 4.508   | -20.037 | 20.841 |
| ATOM | 5760 | N    | ARG   | A   | 352    | 6.760   | -20.063 | 20.821 |
| ATOM | 5761 | H    | ARG   | A   | 352    | 7.581   | -20.308 | 20.283 |
| ATOM | 5762 | CA   | ARG   | A   | 352    | 7.007   | -19.351 | 22.082 |
| ATOM | 5763 | HA   | ARG   | A   | 352    | 6.100   | -18.838 | 22.399 |
| ATOM | 5764 | CB   | ARG   | A   | 352    | 7.430   | -20.354 | 23.170 |
| ATOM | 5765 | HB2  | ARG   | A   | 352    | 8.355   | -20.836 | 22.855 |
| ATOM | 5766 | HB3  | ARG   | A   | 352    | 7.652   | -19.803 | 24.080 |
| ATOM | 5767 | CG   | ARG   | A   | 352    | 6.401   | -21.463 | 23.483 |
| ATOM | 5768 | HG2  | ARG   | A   | 352    | 6.197   | -22.033 | 22.575 |
| ATOM | 5769 | HG3  | ARG   | A   | 352    | 6.859   | -22.144 | 24.201 |
| ATOM | 5770 | CD   | ARG   | A   | 352    | 5.068   | -20.965 | 24.071 |
| ATOM | 5771 | HD2  | ARG   | A   | 352    | 5.263   | -20.486 | 25.033 |
| ATOM | 5772 | HD3  | ARG   | A   | 352    | 4.626   | -20.217 | 23.415 |
| ATOM | 5773 | NE   | ARG   | A   | 352    | 4.113   | -22.073 | 24.279 |
| ATOM | 5774 | HE   | ARG   | A   | 352    | 4.094   | -22.480 | 25.205 |
| ATOM | 5775 | CZ   | ARG   | A   | 352    | 3.194   | -22.521 | 23.429 |
| ATOM | 5776 | NH1  | ARG   | A   | 352    | 3.002   | -21.992 | 22.242 |
| ATOM | 5777 | HH11 | ARG   | A   | 352    | 3.569   | -21.215 | 21.932 |
| ATOM | 5778 | HH12 | ARG   | A   | 352    | 2.310   | -22.372 | 21.622 |
| ATOM | 5779 | NH2  | ARG   | A   | 352    | 2.428   | -23.534 | 23.762 |
| ATOM | 5780 | HH21 | ARG   | A   | 352    | 2.492   | -23.947 | 24.688 |
| ATOM | 5781 | HH22 | ARG   | A   | 352    | 1.689   | -23.841 | 23.157 |
| ATOM | 5782 | C    | ARG   | A   | 352    | 8.097   | -18.291 | 21.854 |
| ATOM | 5783 | O    | ARG   | A   | 352    | 9.008   | -18.519 | 21.053 |
| ATOM | 5784 | N    | CSERA | 353 | 7.994  | -17.131 | 22.510  |        |
| ATOM | 5785 | H    | CSERA | 353 | 7.292  | -17.061 | 23.236  |        |
| ATOM | 5786 | CA   | CSERA | 353 | 8.735  | -15.904 | 22.137  |        |
| ATOM | 5787 | HA   | CSERA | 353 | 9.145  | -16.033 | 21.143  |        |
| ATOM | 5788 | CB   | CSERA | 353 | 7.800  | -14.701 | 22.088  |        |
| ATOM | 5789 | HB2  | CSERA | 353 | 7.364  | -14.517 | 23.069  |        |
| ATOM | 5790 | HB3  | CSERA | 353 | 8.358  | -13.813 | 21.780  |        |
| ATOM | 5791 | OG   | CSERA | 353 | 6.773  | -14.965 | 21.159  |        |
| ATOM | 5792 | HG   | CSERA | 353 | 7.081  | -15.624 | 20.502  |        |
| ATOM | 5793 | C    | CSERA | 353 | 9.938  | -15.587 | 23.009  |        |
| ATOM | 5794 | O    | CSERA | 353 | 10.927 | -15.066 | 22.455  |        |
| ATOM | 5795 | OXT  | CSERA | 353 | 9.905  | -15.776 | 24.243  |        |
| ATOM | 5796 | C4*  | ATB   | C   | 354    | 4.078   | 8.181   | 11.577 |
| ATOM | 5797 | H40  | ATB   | C   | 354    | 3.443   | 8.727   | 10.880 |
| ATOM | 5798 | O4*  | ATB   | C   | 354    | 3.281   | 7.154   | 12.150 |
| ATOM | 5799 | C1*  | ATB   | C   | 354    | 2.873   | 7.527   | 13.457 |
| ATOM | 5800 | H10  | ATB   | C   | 354    | 1.786   | 7.558   | 13.524 |
| ATOM | 5801 | N9   | ATB   | C   | 354    | 3.349   | 6.523   | 14.437 |
| ATOM | 5802 | C8   | ATB   | C   | 354    | 4.445   | 5.691   | 14.378 |
| ATOM | 5803 | H80  | ATB   | C   | 354    | 5.149   | 5.689   | 13.554 |
| ATOM | 5804 | N7   | ATB   | C   | 354    | 4.567   | 4.896   | 15.412 |
| ATOM | 5805 | C5   | ATB   | C   | 354    | 3.448   | 5.211   | 16.201 |
| ATOM | 5806 | C6   | ATB   | C   | 354    | 2.922   | 4.746   | 17.435 |
| ATOM | 5807 | N6   | ATB   | C   | 354    | 3.455   | 3.791   | 18.166 |
| ATOM | 5808 | H60  | ATB   | C   | 354    | 2.997   | 3.503   | 19.023 |



|      |      |      |     |   |     |        |        |        |
|------|------|------|-----|---|-----|--------|--------|--------|
| ATOM | 5809 | H61  | ATB | C | 354 | 4.251  | 3.312  | 17.792 |
| ATOM | 5810 | N1   | ATB | C | 354 | 1.807  | 5.272  | 17.949 |
| ATOM | 5811 | C2   | ATB | C | 354 | 1.206  | 6.226  | 17.254 |
| ATOM | 5812 | H2   | ATB | C | 354 | 0.304  | 6.637  | 17.679 |
| ATOM | 5813 | N3   | ATB | C | 354 | 1.567  | 6.752  | 16.092 |
| ATOM | 5814 | C4   | ATB | C | 354 | 2.712  | 6.193  | 15.613 |
| ATOM | 5815 | C3*  | ATB | C | 354 | 4.476  | 9.176  | 12.670 |
| ATOM | 5816 | H30  | ATB | C | 354 | 5.466  | 8.928  | 13.063 |
| ATOM | 5817 | O3*  | ATB | C | 354 | 4.421  | 10.523 | 12.180 |
| ATOM | 5818 | H3'  | ATB | C | 354 | 5.304  | 10.945 | 12.280 |
| ATOM | 5819 | C2*  | ATB | C | 354 | 3.396  | 8.939  | 13.742 |
| ATOM | 5820 | H20  | ATB | C | 354 | 3.827  | 9.013  | 14.744 |
| ATOM | 5821 | O2*  | ATB | C | 354 | 2.316  | 9.856  | 13.610 |
| ATOM | 5822 | H2'  | ATB | C | 354 | 2.716  | 10.697 | 13.337 |
| ATOM | 5823 | HH31 | ACE | C | 355 | 12.354 | 18.582 | 1.388  |
| ATOM | 5824 | CH3  | ACE | C | 355 | 12.092 | 17.688 | 0.828  |
| ATOM | 5825 | HH32 | ACE | C | 355 | 12.959 | 17.327 | 0.279  |
| ATOM | 5826 | HH33 | ACE | C | 355 | 11.289 | 17.915 | 0.129  |
| ATOM | 5827 | C    | ACE | C | 355 | 11.634 | 16.615 | 1.783  |
| ATOM | 5828 | O    | ACE | C | 355 | 11.544 | 16.857 | 2.984  |
| ATOM | 5829 | N    | ALA | C | 356 | 11.347 | 15.435 | 1.240  |
| ATOM | 5830 | H    | ALA | C | 356 | 11.472 | 15.334 | 0.246  |
| ATOM | 5831 | CA   | ALA | C | 356 | 10.959 | 14.237 | 1.987  |
| ATOM | 5832 | HA   | ALA | C | 356 | 10.249 | 14.515 | 2.769  |
| ATOM | 5833 | CB   | ALA | C | 356 | 10.256 | 13.297 | 0.992  |
| ATOM | 5834 | HB1  | ALA | C | 356 | 10.957 | 13.001 | 0.208  |
| ATOM | 5835 | HB2  | ALA | C | 356 | 9.904  | 12.398 | 1.498  |
| ATOM | 5836 | HB3  | ALA | C | 356 | 9.399  | 13.800 | 0.541  |
| ATOM | 5837 | C    | ALA | C | 356 | 12.161 | 13.539 | 2.666  |
| ATOM | 5838 | O    | ALA | C | 356 | 13.320 | 13.916 | 2.459  |
| ATOM | 5839 | N    | THB | C | 357 | 11.887 | 12.487 | 3.445  |
| ATOM | 5840 | H    | THB | C | 357 | 10.923 | 12.256 | 3.619  |
| ATOM | 5841 | CA   | THB | C | 357 | 12.891 | 11.485 | 3.824  |
| ATOM | 5842 | HA   | THB | C | 357 | 13.699 | 11.996 | 4.348  |
| ATOM | 5843 | C    | THB | C | 357 | 13.451 | 10.805 | 2.555  |
| ATOM | 5844 | O    | THB | C | 357 | 12.665 | 10.280 | 1.755  |
| ATOM | 5845 | N    | PRO | C | 358 | 14.785 | 10.779 | 2.339  |
| ATOM | 5846 | CD   | PRO | C | 358 | 15.811 | 11.437 | 3.143  |
| ATOM | 5847 | HD2  | PRO | C | 358 | 15.761 | 11.133 | 4.188  |
| ATOM | 5848 | HD3  | PRO | C | 358 | 15.693 | 12.518 | 3.061  |
| ATOM | 5849 | CG   | PRO | C | 358 | 17.149 | 11.028 | 2.534  |
| ATOM | 5850 | HG2  | PRO | C | 358 | 17.481 | 10.084 | 2.972  |
| ATOM | 5851 | HG3  | PRO | C | 358 | 17.908 | 11.800 | 2.654  |
| ATOM | 5852 | CB   | PRO | C | 358 | 16.769 | 10.827 | 1.069  |
| ATOM | 5853 | HB2  | PRO | C | 358 | 17.474 | 10.182 | 0.552  |
| ATOM | 5854 | HB3  | PRO | C | 358 | 16.703 | 11.799 | 0.574  |
| ATOM | 5855 | CA   | PRO | C | 358 | 15.386 | 10.189 | 1.143  |
| ATOM | 5856 | HA   | PRO | C | 358 | 14.815 | 10.471 | 0.257  |
| ATOM | 5857 | C    | PRO | C | 358 | 15.496 | 8.654  | 1.190  |
| ATOM | 5858 | O    | PRO | C | 358 | 15.810 | 8.040  | 0.171  |
| ATOM | 5859 | N    | NME | C | 359 | 15.252 | 8.034  | 2.351  |
| ATOM | 5860 | H    | NME | C | 359 | 14.996 | 8.606  | 3.143  |
| ATOM | 5861 | CH3  | NME | C | 359 | 15.307 | 6.592  | 2.539  |
| ATOM | 5862 | HH31 | NME | C | 359 | 14.698 | 6.104  | 1.777  |
| ATOM | 5863 | HH32 | NME | C | 359 | 16.338 | 6.250  | 2.445  |
| ATOM | 5864 | HH33 | NME | C | 359 | 14.925 | 6.330  | 3.524  |

END

**Complete citations for refs 22 and 26 in the manuscript:**

22. Berman, H. M.; Battistuz, T.; Bhat, T. N.; Bluhm, W. F.; Bourne, P. E.; Burkhardt, K.; Feng, Z.; Gilliland, G. L.; Iype, L.; Jain, S.; Fagan, P.; Marvin, J.; Padilla, D.; Ravichandran, V.; Schneider, B.; Thanki, N.; Weissig, H.; Westbrook, J. D.; Zardecki, C. *Acta Crystallogr., Sect. D.: Biol. Crystallogr.* **2002**, *58*, 899–907.
  
26. Case, A.; Pearlman, D. A.; Caldwell, J. W.; Cheatham, T. E.; Wang, J. M.; Ross, W. S.; Simmerling, C.; Darden, T.; Merz, K. M.; Stanton, R. V.; Cheng, A.; Vincent, J. J.; Crowley, M.; Tsui, V.; Gohlke, H.; Radmer, R.; Duan, Y.; Pitera, J.; Massova, I.; Seibel, G. L.; Singh, U. C.; Weiner, P. A. *Amber 7*; University of California: San Francisco, 2002.
